# Supplementary material for: Autoimmune hypothyroidism GWAS reveals independent autoimmune and thyroid-specific contributions and an inverse relation with cancer risk
Source: Research Square preprint supplement (doi:10.21203/rs.3.rs-4626646/v1), 2024-07-08
Supplement: Supplementary file 1 [file 935bf792bcd4053948f01c3d.xlsx]

## Sheet: Table 1a - coding variants
lead_variant	pval	FIN_af		r2 coding	gene : aa_sub	functional_variants_strict
12:111446804:T:C	9.07e-234	0.595		1	SH2B3:W262R	chr12_111446804_T_C|missense_variant|SH2B3|1.0
2:162267541:C:T	2.09e-32	0.585		1	IFIH1:A946T	chr2_162267541_C_T|missense_variant|IFIH1|1.0
16:50301163:C:A	4.66e-30	0.00872		1	ADCY7:D439E	chr16_50301163_C_A|missense_variant|ADCY7|1.0
2:162268127:T:C	6.91e-28	0.0194		1	IFIH1:I923V	chr2_162268127_T_C|missense_variant|IFIH1|1.0
19:10352442:G:C	1.17e-24	0.0309		1	TYK2:P1104A	chr19_10352442_G_C|missense_variant|TYK2|1.0
8:132887335:C:T	2.01e-21	0.00145		1	TG:Q655X	chr8_132887335_C_T|stop_gained|TG|1.0
1:2562891:G:A	6.82e-21	0.121		1	TNFRSF14:V241I	chr1_2562891_G_A|missense_variant|TNFRSF14|1.0
6:166929653:G:A	6.25e-16	0.0579		1	RNASET2:R236W	chr6_166929653_G_A|missense_variant|RNASET2|1.0
19:11416089:T:G	9.88e-16	0.576		1	RGL3:H162P	chr19_11416089_T_G|missense_variant|RGL3|1.0
11:94179472:A:G	3.41e-14	0.0859		1	PANX1:I272V	chr11_94179870_A_G|missense_variant|PANX1|1.0
19:48703417:G:A	1.07e-13	0.374		1	FUT2:W154X	chr19_48703417_G_A|stop_gained|FUT2|1.0
2:97658891:G:A	4.22e-13	0.234		1	ACTR1B:A143V, ANKRD36:K5S_fsTer29	chr2_97658891_G_A|missense_variant|ACTR1B|1.0;chr2_97113750_GC_G|frameshift_variant|ANKRD36|0.972192
3:58197909:G:A	1.7e-11	0.061		1	DNASE1L3:R206C	chr3_58197909_G_A|missense_variant|DNASE1L3|1.0
19:3179519:C:T	1.12e-10	0.0546		1	S1PR4:R243C	chr19_3179519_C_T|missense_variant|S1PR4|1.0
19:49665663:G:A	2.77e-10	0.00313		1	IRF3:A277T	chr19_49662101_C_T|missense_variant|IRF3|1.0
11:308290:T:C	4.05e-10	0.482		1	IFITM2:V33A	chr11_308290_T_C|missense_variant|IFITM2|1.0
13:42574410:C:G	9.51e-10	0.0413		1	TNFSF11:P36A	chr13_42574410_C_G|missense_variant|TNFSF11|1.0
1:185182538:G:A	1.03e-09	0.345		1	SWT1:H536R, I148V	chr1_185202737_A_G|missense_variant|SWT1|1.0;chr1_185174589_A_G|missense_variant|SWT1|0.901283
10:113588287:G:A	1.27e-09	0.0272		1	HABP2:G534E	chr10_113588287_G_A|missense_variant|HABP2|1.0
23:154018741:A:G	1.6e-09	0.853		1	IRAK1:F196S, S532L	chr23_154018741_A_G|missense_variant|IRAK1|1.0;chr23_154013378_G_A|missense_variant|IRAK1|0.956464
12:6773332:C:A	1.67e-09	0.00098		1	LAG3:P67T	chr12_6773332_C_A|missense_variant|LAG3|1.0
19:21537632:CA:C	5.24e-09	0.00724		1	ZNF429:H527L_fsTer157	chr19_21537632_CA_C|frameshift_variant|ZNF429|1.0
7:127375029:G:A	5.53e-09	0.0423		1	ZNF800:P103S	chr7_127375029_G_A|missense_variant|ZNF800|1.0
3:101852100:G:C	5.67e-09	0.0146		1	NFKBIZ:G102A	chr3_101852100_G_C|missense_variant|NFKBIZ|1.0
7:44977336:G:A	8.71e-09	0.336		1	MYO1G:V49M	chr7_44977022_C_T|missense_variant|MYO1G|1.0
1:113834946:A:G	4.94e-324	0.855		1	PTPN22:W620R	chr1_113834946_A_G|missense_variant|PTPN22|1.0
1:116769497:A:G	8.58e-09	0.188		0.999294	CD2:H266Q	chr1_116768525_C_A|missense_variant|CD2|0.999294
10:122389836:C:T	1.95e-16	0.29		0.998056	PLEKHA1:T320A	chr10_122429681_A_G|missense_variant|PLEKHA1|0.998056
17:39787478:C:A	1.61e-11	0.0423		0.996705	IKZF3:G234A, GSDMB:N250G	chr17_39788266_C_G|missense_variant|IKZF3|0.996705;chr17_39906250_T_C|missense_variant|GSDMB|0.944618
2:97890066:T:C	7.6e-24	0.0193		0.994234	ZAP70:T155M	chr2_97725153_C_T|missense_variant|ZAP70|0.994234
8:60473974:T:C	2.3e-18	0.405		0.993393	RAB2A:L68P *	chr8_60576265_T_C|missense_variant|RAB2A|0.993393
4:105282863:A:C	1.08e-08	0.34		0.992449	TET2:I1762V	chr4_105275794_A_G|missense_variant|TET2|0.992449
3:12209924:G:A	8.3e-38	0.771		0.991558	SYN2:T506A	chr3_12187515_A_G|missense_variant|SYN2|0.991558
5:139474618:A:C	3.11e-13	0.702		0.989686	SMIM33:G88S	chr5_139472784_G_A|missense_variant|SMIM33|0.989686
22:31146151:A:G	1.67e-09	0.782		0.987389	PLA2G3:S70A	chr22_31140147_A_C|missense_variant|PLA2G3|0.987389
22:37187692:G:GC	1.32e-57	0.399		0.983155	C1QTNF6:G21V	chr22_37185445_C_A|missense_variant|C1QTNF6|0.983155
23:79185670:A:C	3.53e-26	0.629		0.979844	GPR174:S162P	chr23_79171491_T_C|missense_variant|GPR174|0.979844
16:67628912:T:A	1.18e-13	0.039		0.979578	AGRP:A67T, LRRC36:S744G R222P G509S, KCTD19:E750K	chr16_67483042_C_T|missense_variant|AGRP|0.979578;chr16_67385054_A_G|missense_variant|LRRC36|0.96774;chr16_67291808_C_T|missense_variant|KCTD19|0.96774;chr16_67363677_G_C|missense_variant|LRRC36|0.96774;chr16_67375277_G_A|missense_variant|LRRC36|0.966133
17:46019187:G:A	5.63e-10	0.081		0.97744	SPPL2C:R461P P643R G620R S224P I471V S601P, MAPT:V364A P277L R455W, KANSL1:I1085T	chr17_45846288_G_C|missense_variant|SPPL2C|0.97744;chr17_45846834_C_G|missense_variant|SPPL2C|0.97744;chr17_45846764_G_A|missense_variant|SPPL2C|0.97744;chr17_45845576_T_C|missense_variant|SPPL2C|0.97744;chr17_45846317_A_G|missense_variant|SPPL2C|0.97744;chr17_45983670_T_C|missense_variant|MAPT|0.97744;chr17_46031540_A_G|missense_variant|KANSL1|0.97744;chr17_45983409_C_T|missense_variant|MAPT|0.9…
1:7884770:C:A	1.87e-08	0.0269		0.975569	PER3:P415A H417R	chr1_7809893_C_G|missense_variant|PER3|0.975569;chr1_7809900_A_G|missense_variant|PER3|0.975569
22:29579458:A:G	8.35e-10	0.804		0.974539	THOC5:V579I	chr22_29512083_C_T|missense_variant|THOC5|0.974539
14:105759223:C:T	1.37e-16	0.39		0.969527	IGHG3:P221L S314N Y226F, IGHG1:L97R D239E L241M	chr14_105769806_G_A|missense_variant|IGHG3|0.969527;chr14_105769430_C_T|missense_variant|IGHG3|0.969285;chr14_105742782_T_C|missense_variant|IGHG1|0.955058;chr14_105741749_A_C|missense_variant|IGHG1|0.954348;chr14_105741745_G_T|missense_variant|IGHG1|0.954348;chr14_105769791_T_A|missense_variant|IGHG3|0.891045
1:156825994:A:G	1.44e-24	0.627		0.967335	SH2D2A:N52S	chr1_156815190_T_C|missense_variant|SH2D2A|0.967335
2:55631052:T:G	1.35e-09	0.0367		0.965914	CFAP36:I246F, PNPT1:N590D	chr2_55544033_A_T|missense_variant|CFAP36|0.965914;chr2_55645403_T_C|missense_variant|PNPT1|0.952138
11:61128363:A:G	9.58e-09	0.612		0.963744	CD5:A471V	chr11_61125763_C_T|missense_variant|CD5|0.963744
18:69860373:A:G	2.34e-20	0.536		0.95002	CD226:S307G	chr18_69864406_T_C|missense_variant|CD226|0.95002
9:125354538:A:G	6.3e-10	0.508		0.946246	GAPVD1:V334L *	chr9_125309994_G_C|missense_variant|GAPVD1|0.946246;chr9_125263683_ACAGCACTCCATCTGTAGGTATGTCTGT_A|splice_donor_variant|GAPVD1|0.942064
17:7826527:C:A	2.64e-08	0.0934		0.945671	KDM6B:T761T762del	chr17_7848540_TCACCAC_T|inframe_deletion|KDM6B|0.945671
19:40278113:C:T	1.54e-15	0.0106		0.875708	ZNF780B:K284N	chr19_40036007_T_G|missense_variant|ZNF780B|0.875708
17:42137394:T:C	2.17e-31	0.203		0.848517	HSPB9:Q2P	chr17_42122855_A_C|missense_variant|HSPB9|0.848517
11:64340005:T:C	1.24e-13	0.385		0.848291	CCDC88B:D193E	chr11_64341646_T_G|missense_variant|CCDC88B|0.848291
6:108989516:T:G	1.66e-15	0.824		0.83319	SESN1:L103I	chr6_109002316_G_T|missense_variant|SESN1|0.83319
8:132905343:G:A	9.93e-29	0.65		0.812947	TG:D1312G	chr8_132908273_A_G|missense_variant|TG|0.812947
4:186086720:A:G	1.59e-35	0.368		0.802475	TLR3:L412F	chr4_186082920_C_T|missense_variant|TLR3|0.802475
6:368019:T:A	6.42e-11	0.00431		0.78485	IRF4:P88Q	chr6_394867_C_A|missense_variant|IRF4|0.78485
22:41428193:A:AAAT	6.01e-12	0.751		0.783721	C22orf46 (non-coding transcript)	chr22_41693619_T_C|missense_variant|C22orf46|0.783721
5:157186630:T:C	1.02e-11	0.106		0.782093	FAM71B:M564T	chr5_157162574_A_G|missense_variant|FAM71B|0.782093
6:108941239:G:C	2.55e-09	0.426		0.779716	ARMC2 (splice acceptor) *	chr6_108879926_A_C|splice_acceptor_variant|ARMC2|0.779716
9:124267351:A:G	9.95e-46	0.402		0.771909	PSMB7:V39A	chr9_124414882_A_G|missense_variant|PSMB7|0.771909
1:1238231:G:A	1.38e-09	0.154		0.753681	C1QTNF12:C231R A180V	chr1_1243102_A_G|missense_variant|C1QTNF12|0.753681;chr1_1243545_G_A|missense_variant|C1QTNF12|0.752422
12:56627222:T:C	5.73e-14	0.317		0.7434	NACA:V336E	chr12_56720523_A_T|missense_variant|NACA|0.743446
20:33085232:A:T	1.27e-09	0.0652		0.742837	BPIFB1:T464S	chr20_33306983_C_G|missense_variant|BPIFB1|0.742837
2:200872011:T:C	2.17e-17	0.236		0.741377	NIF3L1:T324I	chr2_200903515_C_T|missense_variant|NIF3L1|0.741377
5:35837132:G:A	1.51e-21	0.396		0.73841	IL7R:T244I	chr5_35874473_C_T|missense_variant|IL7R|0.73841
3:36979158:T:C	1.56e-12	0.371		0.719468	MLH1:I219V	chr3_37012077_A_G|missense_variant|MLH1|0.719468
11:10509469:T:C	1.04e-13	0.0313		0.716495	IRAG1:A79T	chr11_10634062_C_T|missense_variant|IRAG1|0.716495
22:38700597:T:C	1.43e-13	0.399		0.70125	KDELR3:V199G	chr22_38481456_T_G|missense_variant|KDELR3|0.70125
All coding variant annotations using MANE select transcript as reported in gnomAD v4, except those marked with '*' which pertain to an alternate transcript

## Sheet: Table 1b - FE
locus_id	rsids	chrom	pos	ref	alt	meta-pval	FIN_af	FIN_enr	FG_beta	FG_se	FG_pval		coding_assoc
12:6773332:C:A	rs149722682	12	6773332	C	A	1.67e-09	0.00098	inf	0.63	0.104	1.67e-09		LAG3
8:132887335:C:T	rs771807370	8	132887335	C	T	2.01e-21	0.00145	inf	0.829	0.0872	2.01e-21		TG
23:155548829:G:A	rs184966528	23	155548829	G	A	2.36e-08	0.0265	120.2	-0.113	0.0202	2.36e-08
19:40278113:C:T	rs565825677	19	40278113	C	T	1.54e-15	0.0106	93.6	0.252	0.0316	1.54e-15		ZNF780B
1:51075821:C:CA	NA	1	51075821	C	CA	4.74e-10	0.0568	53	0.0901	0.0145	4.74e-10
16:27384341:C:CT	rs201121732	16	27384341	C	CT	2.17e-34	0.0582	50.6	0.173	0.0141	2.17e-34
2:97890066:T:C	rs182482858	2	97890066	T	C	7.6e-24	0.0193	38	0.237	0.0235	7.61e-24		ZAP70
3:152243543:C:T	rs183867058	3	152243543	C	T	4.51e-08	0.0212	37.3	0.127	0.0233	4.51e-08
12:519821:G:C	rs150722154	12	519821	G	C	1.63e-08	0.0351	16.9	0.104	0.0185	1.63e-08
6:368019:T:A	NA	6	368019	T	A	6.42e-11	0.00431	13.3	-0.376	0.0575	6.42e-11		IRF4
2:100705638:A:G	rs181377372	2	100705638	A	G	3.96e-09	0.0209	10.4	0.135	0.0232	6.34e-09	*
9:3857583:G:A	rs1253764564	9	3857583	G	A	5.68e-10	0.00126	9.4	0.545	0.0879	5.68e-10
12:56182198:T:G	rs554485811	12	56182198	T	G	6.88e-12	0.00521	7.3	0.31	0.0452	6.88e-12
19:3179519:C:T	rs61731111	19	3179519	C	T	1.12e-10	0.0546	5.8	-0.0888	0.0155	9.43e-09	*	S1PR4
Table 1b - 14 index associations to low frequency variants with 5x or greater frequency in Finns than non-Finnish-Swedish-Estonian Europeans (gnomAD v3)
All variants except the two asterisked variants did not have association data in panUKBB owing to the extreme low frequency.
coding_assoc column denotes variants also appearing in Table 1a in which a coding variant is, or is in high LD with, the lead variant.

## Sheet: ST1 - 417 hits
chrom	pos	ref	alt	beta	pval		FG_beta	FG_se	FG_pval	FG_af		UKBB_beta	UKBB_se	UKBB_pval	UKBB_af
1	1238231	G	A	-0.0476	1.38e-09		-0.0408	0.00951	1.76e-05	0.154		-0.0623	0.014	8.25e-06	0.14361
1	2562891	G	A	0.0788	6.82e-21		0.071	0.0103	6.38e-12	0.121		0.0937	0.0144	7.66e-11	0.13241
1	2590765	G	T	-0.0396	1.77e-08		-0.0334	0.00837	6.57e-05	0.211		-0.0543	0.0129	2.65e-05	0.17405
1	7884770	C	A	-0.115	1.87e-08		-0.11	0.0216	3.59e-07	0.0269		-0.163	0.065	0.0118	0.005896
1	8437247	T	A	-0.035	1.66e-09		-0.0258	0.00716	0.000305	0.656		-0.0526	0.00993	1.16e-07	0.58634
1	10683890	G	A	-0.0342	1.43e-09		-0.0292	0.00687	2.19e-05	0.443		-0.0445	0.0099	6.89e-06	0.42868
1	12203862	C	T	-0.0519	2.1e-13		-0.0456	0.00845	6.96e-08	0.213		-0.0665	0.0129	2.4e-07	0.19552
1	19445431	C	T	0.0834	4.48e-45		0.091	0.00727	5.01e-36	0.318		0.0682	0.0102	2.23e-11	0.36048
1	19517082	A	G	-0.112	1.03e-40		-0.117	0.0107	3.55e-28	0.121		-0.103	0.0136	2.59e-14	0.15487
1	25001856	C	T	0.0501	1.52e-15		0.0484	0.00756	1.48e-10	0.713		0.0538	0.0113	1.89e-06	0.74971
1	28193650	C	T	-0.0341	7.58e-09		-0.0304	0.00724	2.64e-05	0.33		-0.0413	0.0102	4.93e-05	0.35751
1	37898603	G	A	-0.0469	6.65e-17		-0.038	0.00683	2.63e-08	0.465		-0.0652	0.00984	3.3e-11	0.44125
1	38151199	C	A	-0.0412	1.94e-10		-0.027	0.00794	0.000664	0.243		-0.0688	0.0111	6.15e-10	0.26074
1	39929497	A	G	0.0373	3.19e-09		0.0329	0.00765	1.74e-05	0.271		0.0465	0.0111	2.66e-05	0.26551
1	51075821	C	CA	0.0901	4.74e-10		0.0901	0.0145	4.74e-10	0.0568		NA	NA	NA	NA
1	53909897	C	A	-0.0432	1.32e-14		-0.0545	0.00684	1.71e-15	0.545		-0.0202	0.00979	0.0395	0.53123
1	59705533	A	G	0.0553	1.13e-08		0.0508	0.0125	5.08e-05	0.0799		0.062	0.0152	4.85e-05	0.1246
1	61144924	G	GAC	0.0974	1.77e-08		0.0828	0.0251	0.00096	0.98		0.111	0.0239	3.59e-06	0.95492
1	61208380	T	G	-0.0327	6.46e-09		-0.0319	0.00689	3.57e-06	0.424		-0.0343	0.00981	0.000466	0.46965
1	64989483	G	C	0.0755	1.27e-10		0.057	0.0148	0.000116	0.0548		0.107	0.0193	3.05e-08	0.070633
1	64989794	C	A	0.0796	1.27e-18		0.0654	0.0109	2.1e-09	0.887		0.11	0.0161	6.99e-12	0.89342
1	67273905	A	C	0.0387	2.05e-08		0.0277	0.00876	0.00155	0.184		0.0565	0.0112	4.34e-07	0.25988
1	67327488	C	G	0.059	3.44e-11		0.0426	0.012	0.000399	0.0871		0.0787	0.0132	2.62e-09	0.16266
1	77984833	C	A	0.0518	6.14e-10		0.0526	0.0101	1.94e-07	0.128		0.0501	0.015	0.000816	0.12414
1	101270361	C	T	-0.032	4.32e-08		-0.0244	0.007	0.000483	0.384		-0.0496	0.0106	3.15e-06	0.30756
1	107819547	GAC	G	0.227	2.6e-143		0.205	0.0103	7.55e-88	0.115		0.29	0.0176	3.78e-61	0.089134
1	109804203	G	A	0.0364	3.7e-08		0.0287	0.00813	0.000405	0.228		0.0516	0.0114	6.11e-06	0.26096
1	109813390	T	G	0.0395	3.29e-12		0.0309	0.00692	7.86e-06	0.407		0.0568	0.00987	8.52e-09	0.52523
1	111154187	GTATTTTATTTTATTTTATTTTATTT	G	-0.0871	3.49e-11		-0.0871	0.0132	3.49e-11	0.0753		NA	NA	NA	NA
1	113834946	A	G	-0.347	4.94e-324		-0.309	0.00922	1.47e-245	0.855		-0.476	0.0168	3.76e-177	0.89851
1	116769497	A	G	-0.0453	8.58e-09		-0.0336	0.00873	0.000117	0.188		-0.0951	0.0181	1.44e-07	0.079267
1	149671787	A	T	-0.237	6.51e-09		-0.237	0.0408	6.51e-09	0.00957		NA	NA	NA	NA
1	150715890	AAT	A	-0.036	1.35e-10		-0.0345	0.00682	4.13e-07	0.466		-0.039	0.00982	7.28e-05	0.47349
1	156825994	A	G	-0.0597	1.44e-24		-0.0553	0.00703	3.6e-15	0.627		-0.0693	0.0104	3.28e-11	0.6769
1	157764025	A	G	0.0334	2.99e-09		0.036	0.00685	1.51e-07	0.459		0.028	0.00985	0.00452	0.47254
1	160460999	C	CAG	-0.0539	2.83e-08		-0.04	0.0122	0.000991	0.0893		-0.0782	0.0161	1.21e-06	0.116
1	167457187	G	A	0.0467	5.35e-14		0.0401	0.0079	3.7e-07	0.246		0.0573	0.01	1.16e-08	0.3856
1	168544770	C	T	0.0437	8.99e-14		0.0436	0.00698	4.34e-10	0.384		0.0441	0.0108	4.55e-05	0.28883
1	185182538	G	A	0.0357	1.03e-09		0.038	0.00713	9.71e-08	0.345		0.0308	0.0102	0.00247	0.3571
1	198684045	A	G	-0.0664	1.01e-10		-0.0519	0.0134	0.000108	0.0708		-0.0872	0.016	5.09e-08	0.1061
1	198977059	C	T	0.054	1e-19		0.053	0.0073	3.95e-13	0.32		0.0559	0.0102	4.34e-08	0.36365
1	200228410	A	G	-0.033	4.13e-09		-0.0272	0.00687	7.36e-05	0.572		-0.0446	0.00975	4.66e-06	0.50801
1	200858418	C	CT	0.0651	7.14e-15		0.048	0.01	1.68e-06	0.13		0.104	0.0151	6.69e-12	0.11895
1	206477509	C	CA	-0.0509	6.1e-11		-0.0495	0.00933	1.1e-07	0.843		-0.0539	0.0141	0.000128	0.85384
1	206989558	A	G	0.048	8.81e-16		0.0473	0.00736	1.31e-10	0.303		0.0494	0.0102	1.31e-06	0.35633
1	212670845	T	C	0.0361	1.2e-10		0.0344	0.0068	4.33e-07	0.51		0.0396	0.00988	5.98e-05	0.44956
1	212801014	A	G	-0.0344	1.31e-08		-0.0288	0.00752	0.000128	0.717		-0.0448	0.0102	1.16e-05	0.64812
1	218408167	T	C	-0.0394	1.68e-11		-0.0346	0.00705	9.08e-07	0.374		-0.0498	0.0105	1.94e-06	0.33609
1	236143235	A	C	0.0325	5.91e-09		0.0274	0.00679	5.35e-05	0.485		0.0429	0.00979	1.16e-05	0.49461
1	236465834	C	A	0.05	3.52e-18		0.0386	0.00702	3.79e-08	0.405		0.0731	0.01	2.89e-13	0.48838
2	1403856	C	T	0.109	6.04e-83		0.105	0.00685	9.02e-53	0.442		0.117	0.00989	3.44e-32	0.42291
2	8302118	G	A	-0.0442	1.39e-13		-0.0334	0.00719	3.45e-06	0.345		-0.0683	0.0107	1.98e-10	0.29408
2	12504610	C	T	-0.0695	2.96e-34		-0.0586	0.00691	2.44e-17	0.419		-0.0925	0.01	3.07e-20	0.39028
2	43282478	A	G	0.0461	1.53e-15		0.0491	0.00708	4.29e-12	0.623		0.0402	0.01	5.95e-05	0.60707
2	48052438	G	C	0.0372	2.05e-09		0.0401	0.00786	3.41e-07	0.251		0.0324	0.0101	0.00134	0.37614
2	55631052	T	G	0.0839	1.35e-09		0.0547	0.018	0.00238	0.0367		0.126	0.0216	5.71e-09	0.053646
2	61177770	C	G	-0.0414	9.77e-12		-0.042	0.00749	2.08e-08	0.298		-0.0403	0.0104	0.000109	0.32767
2	62232878	T	C	0.0592	1.84e-12		0.0595	0.0102	4.98e-09	0.126		0.0585	0.0149	8.45e-05	0.12392
2	62304949	C	T	0.0447	2.64e-15		0.0386	0.00685	1.78e-08	0.444		0.0578	0.01	7.85e-09	0.39504
2	64690875	AATAGTGGC	A	0.0505	3.75e-16		0.0556	0.00727	1.99e-14	0.327		0.0369	0.0119	0.00191	0.22709
2	65377780	A	G	-0.0398	6.92e-11		-0.0347	0.00725	1.71e-06	0.675		-0.052	0.0113	3.89e-06	0.74972
2	66425823	C	A	-0.0339	1.09e-08		-0.0348	0.00719	1.31e-06	0.663		-0.0319	0.0105	0.00228	0.67535
2	97658891	G	A	-0.054	4.22e-13		-0.0588	0.00814	5.09e-13	0.234		-0.0292	0.0184	0.112	0.083739
2	97890066	T	C	0.237	7.6e-24		0.237	0.0235	7.61e-24	0.0193		NA	NA	NA	NA
2	100705638	A	G	0.132	3.96e-09		0.135	0.0232	6.34e-09	0.0209		0.0951	0.0909	0.296	0.0031352
2	159764337	G	A	0.033	1.85e-08		0.0302	0.00718	2.69e-05	0.348		0.0388	0.0102	0.00014	0.35625
2	159963899	T	C	0.0422	8.03e-10		0.0442	0.00843	1.56e-07	0.791		0.0382	0.0119	0.00126	0.78344
2	161244750	G	A	0.042	3.38e-13		0.033	0.00702	2.61e-06	0.399		0.0607	0.0101	2.01e-09	0.46351
2	162267541	C	T	0.0675	2.09e-32		0.0642	0.00693	1.83e-20	0.585		0.0743	0.01	1.09e-13	0.60916
2	162268127	T	C	-0.225	6.91e-28		-0.206	0.0257	1.05e-15	0.0194		-0.259	0.0343	4.39e-14	0.021544
2	168728843	T	TA	-0.0809	2.79e-08		-0.0774	0.0173	7.68e-06	0.0425		-0.0894	0.027	0.000926	0.037706
2	172024450	A	G	-0.0505	3.47e-08		-0.0527	0.0101	1.97e-07	0.133		-0.0407	0.0214	0.057	0.055262
2	173929212	G	A	-0.0315	2.6e-08		-0.0282	0.00686	4.02e-05	0.449		-0.0384	0.00998	0.000117	0.40606
2	181279128	G	T	0.0515	8.4e-16		0.0442	0.0078	1.42e-08	0.252		0.0666	0.0112	2.81e-09	0.25614
2	191105394	C	G	-0.125	9.82e-80		-0.11	0.00798	6.01e-43	0.769		-0.159	0.0118	3.62e-41	0.77498
2	200176258	C	T	0.0402	1.23e-08		0.0412	0.00835	7.89e-07	0.209		0.0377	0.0132	0.00442	0.16336
2	200872011	T	C	0.0567	2.17e-17		0.0622	0.00797	5.64e-15	0.236		0.0435	0.0123	0.000385	0.19879
2	201311672	G	A	-0.0358	1.63e-10		-0.0339	0.00683	7e-07	0.467		-0.0398	0.0098	4.88e-05	0.4615
2	202099464	C	T	0.0361	5.17e-09		0.0319	0.00742	1.74e-05	0.304		0.0459	0.0112	4.25e-05	0.26126
2	202499211	A	G	-0.0552	2.29e-12		-0.0579	0.00912	2.27e-10	0.172		-0.0474	0.0155	0.00225	0.11233
2	203880280	T	C	-0.149	6.26e-148		-0.122	0.00708	7.27e-67	0.373		-0.2	0.00983	6.3e-92	0.49065
2	213154257	C	G	-0.0458	1.49e-14		-0.0512	0.00741	4.98e-12	0.311		-0.0359	0.00999	0.000324	0.40234
2	216761868	G	T	0.0791	2.76e-40		0.0952	0.00706	1.89e-41	0.625		0.0395	0.0111	0.00036	0.73252
2	217372063	T	C	-0.0682	4.45e-30		-0.0807	0.00703	1.64e-30	0.405		-0.0352	0.0114	0.00199	0.26
2	241255979	C	T	-0.0403	4.32e-10		-0.0312	0.00801	9.62e-05	0.241		-0.0571	0.0109	1.65e-07	0.28011
2	241513201	C	T	-0.0438	9.5e-10		-0.0372	0.00854	1.31e-05	0.202		-0.0595	0.0132	6.12e-06	0.16904
3	4984323	A	G	0.0423	1.27e-10		0.0338	0.00765	1.02e-05	0.27		0.067	0.013	2.3e-07	0.17148
3	12056168	TG	T	-0.0781	3.31e-09		-0.119	0.0758	0.116	0.00216		-0.0768	0.0134	1.01e-08	0.16179
3	12209924	G	A	-0.0842	8.3e-38		-0.0802	0.00805	2.2e-23	0.771		-0.0921	0.0113	3.24e-16	0.74871
3	18241082	G	A	-0.0385	1.21e-09		-0.0298	0.00761	9.05e-05	0.284		-0.0579	0.0114	3.73e-07	0.24467
3	18676563	C	G	0.038	3.28e-10		0.0377	0.00724	1.92e-07	0.668		0.0387	0.011	0.00043	0.7307
3	32310152	A	T	0.0516	1.7e-10		0.0453	0.00913	7.01e-07	0.169		0.0747	0.0174	1.78e-05	0.095039
3	36979158	T	C	-0.0406	1.56e-12		-0.0327	0.00708	3.7e-06	0.371		-0.0556	0.00981	1.44e-08	0.45806
3	39362837	A	T	0.236	3.47e-10		0.224	0.049	4.62e-06	0.00456		0.253	0.0588	1.66e-05	0.0076305
3	39372033	C	T	0.0517	4.44e-15		0.0414	0.0081	3.3e-07	0.23		0.0718	0.0113	2.29e-10	0.25535
3	45875055	TA	T	0.0497	1.04e-13		0.043	0.00781	3.66e-08	0.255		0.068	0.0129	1.4e-07	0.17771
3	58197909	G	A	0.0747	1.7e-11		0.0503	0.0142	0.000395	0.061		0.113	0.0178	2.15e-10	0.081917
3	58274272	A	G	0.0354	6.41e-10		0.0262	0.00698	0.000176	0.395		0.0545	0.01	5.6e-08	0.38888
3	71436486	T	TC	-0.0474	6.41e-11		-0.0435	0.00888	9.8e-07	0.824		-0.0554	0.0126	1.1e-05	0.81318
3	98743259	G	A	0.0459	4.01e-13		0.0455	0.00759	2.09e-09	0.279		0.0468	0.0114	4.24e-05	0.23977
3	101852100	G	C	-0.179	5.67e-09		-0.179	0.0307	5.67e-09	0.0146		NA	NA	NA	NA
3	105766711	T	C	0.0365	3.21e-10		0.0264	0.00697	0.000149	0.602		0.0589	0.0104	1.67e-08	0.67707
3	106216385	TA	T	0.0775	1.83e-27		0.0612	0.00909	1.71e-11	0.166		0.104	0.0115	2.21e-19	0.23498
3	108824113	G	A	-0.0628	1.51e-24		-0.0556	0.00736	4.03e-14	0.323		-0.0793	0.0111	1.16e-12	0.2636
3	119510639	G	A	0.0503	4.32e-14		0.0336	0.00789	2.1e-05	0.245		0.0918	0.0124	1.5e-13	0.19066
3	122024312	C	A	0.0828	4.37e-10		0.0527	0.0177	0.00288	0.0378		0.121	0.0201	1.41e-09	0.06402
3	141899991	G	A	-0.0483	1.35e-08		-0.0379	0.0109	0.000517	0.111		-0.0643	0.0136	2.08e-06	0.15333
3	149485791	T	TAAAAAC	-0.0433	1.77e-13		-0.045	0.00725	5.63e-10	0.337		-0.04	0.01	6.45e-05	0.41162
3	152243543	C	T	0.127	4.51e-08		0.127	0.0233	4.51e-08	0.0212		NA	NA	NA	NA
3	160653119	C	T	-0.035	1.64e-09		-0.0269	0.00702	0.00013	0.383		-0.0525	0.0103	3.48e-07	0.34326
3	169759718	A	G	0.0358	1.11e-08		0.0306	0.00757	5.3e-05	0.283		0.047	0.0111	2.49e-05	0.26109
3	185812502	T	C	-0.0494	3.54e-16		-0.0488	0.00742	4.75e-11	0.306		-0.0507	0.0105	1.44e-06	0.31386
3	188407204	AC	A	-0.115	2.13e-89		-0.102	0.00703	5.52e-48	0.386		-0.14	0.00988	2.69e-45	0.45168
3	191330673	C	T	0.0381	1.56e-09		0.0308	0.00765	5.8e-05	0.272		0.0538	0.0112	1.47e-06	0.26587
3	192899490	C	T	0.0459	1.27e-15		0.0417	0.00705	3.38e-09	0.624		0.0541	0.00987	4.18e-08	0.57587
4	10700346	T	G	0.0652	8.28e-31		0.0587	0.00688	1.41e-17	0.554		0.0787	0.00991	1.98e-15	0.5356
4	26102491	C	T	0.0672	7.38e-28		0.0625	0.00753	1.06e-16	0.28		0.0765	0.0106	5.58e-13	0.30327
4	38675390	T	TC	-0.0318	1.51e-08		-0.0239	0.00682	0.000461	0.484		-0.0483	0.00989	1.01e-06	0.44884
4	40258109	G	A	-0.0384	2.1e-11		-0.0419	0.00695	1.73e-09	0.435		-0.0311	0.0102	0.00219	0.37149
4	40317629	C	T	-0.0573	1.57e-20		-0.0555	0.00766	4.41e-13	0.282		-0.0606	0.0104	5.59e-09	0.32994
4	55457212	C	T	-0.0336	8.26e-09		-0.0318	0.00705	6.38e-06	0.375		-0.0376	0.0104	0.000302	0.32782
4	86953856	GCA	G	0.0518	6.08e-12		0.0351	0.00954	0.000233	0.15		0.0792	0.0122	1e-10	0.19875
4	102527974	A	G	-0.139	1.69e-10		-0.0927	0.0297	0.00181	0.0143		-0.193	0.032	1.7e-09	0.026362
4	105282863	A	C	-0.0335	1.08e-08		-0.0307	0.00721	2.11e-05	0.34		-0.0389	0.01	0.000105	0.38667
4	108177007	C	A	-0.0349	5.6e-10		-0.0351	0.00683	2.75e-07	0.494		-0.0343	0.00989	0.00052	0.57688
4	108402225	A	C	-0.0376	2.4e-09		-0.0389	0.00788	7.69e-07	0.253		-0.0352	0.0105	0.000787	0.32053
4	122113805	A	G	0.0624	3.93e-09		0.053	0.0121	1.11e-05	0.0855		0.0945	0.0223	2.17e-05	0.053416
4	122598164	C	T	-0.0552	1.03e-14		-0.0464	0.00948	9.8e-07	0.156		-0.0666	0.0108	7.71e-10	0.28746
4	141618041	G	GCTAAACA	0.0465	3.69e-08		0.0438	0.0106	3.55e-05	0.116		0.0513	0.014	0.000253	0.14448
4	148737417	A	AT	-0.149	1.16e-75		-0.137	0.0108	5.58e-37	0.122		-0.165	0.0123	4.13e-41	0.20357
4	150382166	G	A	-0.0333	1.28e-08		-0.0349	0.00715	1.07e-06	0.655		-0.03	0.0101	0.00314	0.63774
4	186086720	A	G	-0.0725	1.59e-35		-0.0691	0.00711	2.48e-22	0.368		-0.0795	0.0102	5.79e-15	0.36866
5	692915	A	G	-0.0478	4.91e-10		-0.0478	0.00768	4.91e-10	0.687		NA	NA	NA	NA
5	10597747	T	C	-0.0352	9.78e-10		-0.0289	0.00699	3.61e-05	0.404		-0.0484	0.0101	1.77e-06	0.37695
5	35837132	G	A	-0.0552	1.51e-21		-0.0472	0.007	1.62e-11	0.396		-0.0727	0.0103	1.77e-12	0.34218
5	57282432	T	G	-0.0375	2.31e-09		-0.0361	0.00765	2.41e-06	0.275		-0.0404	0.011	0.000231	0.27235
5	72448837	T	G	0.0335	2.87e-08		0.0239	0.00727	0.000991	0.67		0.0548	0.0108	4.32e-07	0.71396
5	72697394	A	G	0.0524	2.75e-15		0.0507	0.00796	1.88e-10	0.236		0.056	0.0119	2.75e-06	0.21139
5	77179060	A	G	-0.0775	1.82e-15		-0.0888	0.0113	3.17e-15	0.106		-0.0439	0.0195	0.0243	0.068891
5	77239986	T	G	0.115	9.8e-91		0.133	0.00689	4.9e-83	0.414		0.0758	0.00998	3.23e-14	0.39202
5	103260191	C	G	-0.0629	1.23e-25		-0.0524	0.00735	1.05e-12	0.316		-0.0843	0.0104	7.34e-16	0.323
5	111230662	C	T	0.0815	2.29e-12		0.0555	0.0145	0.000129	0.058		0.128	0.0194	4.23e-11	0.073871
5	112116632	C	A	0.0409	4.15e-13		0.0357	0.00685	1.9e-07	0.456		0.0518	0.00993	1.82e-07	0.43969
5	126732070	T	C	-0.0329	8.63e-09		-0.0246	0.007	0.000441	0.387		-0.0497	0.00994	5.57e-07	0.41023
5	134088103	T	C	-0.0812	6.73e-32		-0.0684	0.00779	1.63e-18	0.749		-0.128	0.0149	9.32e-18	0.87719
5	139474618	A	C	0.0453	3.11e-13		0.038	0.00746	3.6e-07	0.702		0.0617	0.0112	3.63e-08	0.74189
5	143413085	A	G	-0.0441	2.03e-14		-0.0399	0.00708	1.81e-08	0.38		-0.0524	0.00992	1.29e-07	0.41026
5	157186630	T	C	0.059	1.02e-11		0.0488	0.011	8.76e-06	0.106		0.0759	0.0141	7.93e-08	0.13846
6	368019	T	A	-0.376	6.42e-11		-0.376	0.0575	6.42e-11	0.00431		NA	NA	NA	NA
6	408079	C	T	0.0586	9.49e-26		0.0505	0.00679	1.07e-13	0.474		0.0758	0.00984	1.35e-14	0.52774
6	7109200	C	T	-0.0333	3.17e-09		-0.027	0.00683	7.59e-05	0.485		-0.0463	0.00987	2.75e-06	0.52254
6	21881714	G	GCGC	0.0752	6.43e-27		0.0775	0.00807	8.12e-22	0.224		0.0684	0.0141	1.19e-06	0.14217
6	22114901	A	C	0.0418	2.64e-13		0.042	0.00687	1.01e-09	0.43		0.0414	0.0103	5.81e-05	0.34607
6	43838872	G	A	0.0902	3.67e-50		0.102	0.00739	3.34e-43	0.679		0.0664	0.0106	3.41e-10	0.69411
6	43938518	C	T	-0.0598	1.62e-18		-0.073	0.00854	1.23e-17	0.202		-0.0367	0.0113	0.00117	0.24817
6	90279406	G	C	0.0953	1.36e-64		0.0759	0.00682	8.84e-29	0.447		0.136	0.00991	4.26e-43	0.58065
6	107114666	TCCGGCCGCC	T	0.0421	1.91e-13		0.0462	0.00694	2.86e-11	0.414		0.0335	0.0101	0.000967	0.39007
6	107724925	T	G	0.0451	1.37e-11		0.0452	0.00768	4.1e-09	0.266		0.0448	0.0134	0.00085	0.15659
6	108941239	G	C	-0.034	2.55e-09		-0.0345	0.00689	5.44e-07	0.426		-0.0329	0.0102	0.00125	0.36746
6	108989516	T	G	-0.0595	1.66e-15		-0.0525	0.00887	3.26e-09	0.824		-0.0765	0.0138	3.26e-08	0.85039
6	111777061	A	G	-0.0353	3.3e-10		-0.0293	0.00685	1.86e-05	0.459		-0.0474	0.00979	1.28e-06	0.47664
6	132827664	A	G	-0.0556	1.66e-08		-0.046	0.0115	6.19e-05	0.0984		-0.0829	0.0193	1.67e-05	0.069818
6	135150478	T	C	0.049	3.13e-13		0.04	0.0082	1.06e-06	0.219		0.0673	0.0117	9.54e-09	0.22522
6	135815734	C	T	0.0483	4.88e-14		0.0355	0.00818	1.45e-05	0.228		0.0687	0.0103	2.76e-11	0.34219
6	137678425	GA	G	0.0451	2.14e-11		0.0448	0.00828	6.27e-08	0.209		0.0456	0.0116	7.99e-05	0.23435
6	137829402	C	T	-0.0506	4.68e-13		-0.0434	0.00862	4.92e-07	0.198		-0.0645	0.012	6.86e-08	0.21568
6	142917587	T	A	-0.0519	4.66e-12		-0.0562	0.00879	1.65e-10	0.186		-0.0404	0.0144	0.00507	0.1324
6	148200156	C	T	0.0761	4.15e-39		0.0634	0.00717	8.67e-19	0.337		0.1	0.00995	5.83e-24	0.40937
6	148316764	G	T	0.292	1.18e-11		0.21	0.0586	0.00034	0.00305		0.388	0.0634	9.54e-10	0.0063398
6	159047533	G	A	0.0434	1.63e-14		0.0395	0.0069	1.07e-08	0.581		0.0513	0.00984	1.84e-07	0.56452
6	165625087	T	C	-0.0506	1.2e-10		-0.0487	0.00954	3.38e-07	0.153		-0.0547	0.0139	7.95e-05	0.14811
6	165633546	A	G	-0.0813	2.87e-38		-0.0854	0.00779	5.53e-28	0.262		-0.0735	0.0106	4.58e-12	0.30514
6	166929653	G	A	0.0928	6.25e-16		0.0804	0.0144	2.48e-08	0.0579		0.114	0.0189	1.71e-09	0.071849
6	166986024	A	G	-0.0847	1.27e-47		-0.0703	0.00706	2.51e-23	0.372		-0.116	0.0104	7.59e-29	0.3346
6	168486653	C	T	0.0355	1.1e-08		0.0402	0.00728	3.36e-08	0.323		0.0229	0.0118	0.0538	0.22176
7	2894752	A	G	0.0532	4.04e-16		0.0551	0.00809	9.46e-12	0.233		0.0495	0.0111	7.95e-06	0.28117
7	4745498	T	G	-0.0452	8.26e-14		-0.0354	0.00762	3.48e-06	0.704		-0.0621	0.00998	4.79e-10	0.5722
7	5753939	G	C	-0.0578	1.58e-10		-0.0484	0.0103	2.42e-06	0.13		-0.09	0.019	2.2e-06	0.072346
7	6395481	A	G	0.0328	7.36e-09		0.0319	0.00694	4.3e-06	0.407		0.0345	0.00982	0.00044	0.45954
7	20418351	C	A	-0.041	1.93e-12		-0.0318	0.00705	6.62e-06	0.631		-0.061	0.0104	3.85e-09	0.6592
7	26110866	GCT	G	-0.0462	4.7e-11		-0.0408	0.00865	2.39e-06	0.196		-0.0568	0.0121	2.45e-06	0.20784
7	26723364	C	G	0.0466	7.27e-14		0.046	0.00784	4.33e-09	0.739		0.0476	0.0102	3.47e-06	0.65204
7	37342861	T	G	0.0611	4.17e-11		0.0415	0.0113	0.000224	0.101		0.102	0.0163	3.58e-10	0.10065
7	37383868	T	A	-0.0343	1.85e-09		-0.0321	0.00691	3.39e-06	0.428		-0.0391	0.0101	0.000116	0.39614
7	44977336	G	A	0.0354	8.71e-09		0.0339	0.00721	2.64e-06	0.336		0.0393	0.0118	0.000818	0.21986
7	46694687	G	C	0.039	2.81e-08		0.0367	0.00906	5.17e-05	0.827		0.0424	0.0111	0.000132	0.73444
7	74606017	G	A	0.105	2.12e-08		0.108	0.0202	9.9e-08	0.0283		0.0904	0.0514	0.0788	0.009467
7	77538960	A	G	0.0422	4.6e-12		0.039	0.00744	1.59e-07	0.297		0.0486	0.0106	4.8e-06	0.30615
7	80372340	A	G	0.0539	3.11e-08		0.0646	0.0124	1.73e-07	0.08		0.0364	0.0158	0.0213	0.107
7	92595474	A	G	0.299	3.48e-09		0.187	0.077	0.0153	0.00193		0.384	0.0671	1.05e-08	0.0061024
7	100804203	T	G	-0.035	1.79e-09		-0.0327	0.00709	3.95e-06	0.367		-0.0395	0.0101	9.64e-05	0.36777
7	127375029	G	A	0.0882	5.53e-09		0.0916	0.0167	4.04e-08	0.0423		0.0723	0.0357	0.0427	0.020387
7	128939988	A	G	0.0523	1.63e-20		0.0471	0.00686	6.9e-12	0.439		0.0632	0.00987	1.58e-10	0.46047
7	129057976	T	TTG	0.0379	2.81e-08		0.0345	0.00788	1.18e-05	0.249		0.0481	0.0137	0.000434	0.15249
7	139098477	C	G	0.0393	2.23e-09		0.0412	0.00791	1.87e-07	0.245		0.0351	0.0118	0.00304	0.2167
7	139704867	A	C	-0.0471	1.17e-11		-0.0465	0.00837	2.66e-08	0.215		-0.0483	0.0124	0.000102	0.19272
8	8462453	G	C	-0.0753	7.17e-41		-0.0604	0.00685	1.19e-18	0.501		-0.106	0.00984	4.85e-27	0.4527
8	9459499	C	T	-0.108	1.55e-10		-0.0958	0.0203	2.46e-06	0.0304		-0.133	0.0298	8.45e-06	0.028915
8	11582510	G	A	0.0494	2.38e-18		0.0341	0.00692	8.42e-07	0.452		0.0804	0.00983	2.81e-16	0.53283
8	23512505	C	T	-0.0469	1.19e-10		-0.0458	0.00943	1.19e-06	0.159		-0.0485	0.0115	2.31e-05	0.23929
8	30325413	A	G	-0.0386	3.2e-08		-0.038	0.00858	9.3e-06	0.2		-0.0396	0.012	0.00094	0.21026
8	32446867	T	G	0.0307	4.81e-08		0.0342	0.00686	6.19e-07	0.445		0.0236	0.00984	0.0167	0.44165
8	32549031	G	A	-0.0541	3.64e-16		-0.0612	0.00792	1.1e-14	0.25		-0.0373	0.0121	0.00212	0.20374
8	60473974	T	C	0.05	2.3e-18		0.0462	0.00693	2.67e-11	0.405		0.0581	0.0101	9.45e-09	0.36643
8	60842154	C	T	-0.068	1.87e-08		-0.0725	0.013	2.24e-08	0.0779		-0.0379	0.0335	0.259	0.021897
8	100317981	A	C	0.0338	2.09e-09		0.0352	0.00688	3.14e-07	0.428		0.0309	0.00984	0.00169	0.43856
8	100409029	GC	G	-0.0826	1.73e-08		-0.0728	0.018	5.19e-05	0.0384		-0.102	0.0252	5.52e-05	0.040288
8	118939661	A	C	-0.0467	4.4e-16		-0.0396	0.00694	1.13e-08	0.409		-0.062	0.0102	1.36e-09	0.35505
8	119850527	T	TA	0.0348	2.64e-08		0.033	0.00733	6.88e-06	0.313		0.0395	0.012	0.000938	0.21699
8	127181049	G	A	-0.0711	1.17e-32		-0.0644	0.00737	2.41e-18	0.317		-0.0839	0.0102	1.89e-16	0.35914
8	127990983	C	A	0.0432	2.69e-12		0.0385	0.00737	1.76e-07	0.308		0.0546	0.0114	1.59e-06	0.25602
8	128144770	A	G	-0.0462	9.41e-16		-0.0398	0.00707	1.77e-08	0.371		-0.0587	0.00989	2.93e-09	0.43947
8	128589526	G	A	0.0555	2.74e-13		0.0565	0.0089	2.15e-10	0.178		0.0526	0.0145	0.000293	0.13452
8	132887335	C	T	0.829	2.01e-21		0.829	0.0872	2.01e-21	0.00145		NA	NA	NA	NA
8	132905343	G	A	-0.0648	9.93e-29		-0.0601	0.00714	3.84e-17	0.65		-0.074	0.0101	1.93e-13	0.61303
8	139988205	C	T	-0.101	3.66e-08		-0.103	0.0194	1.26e-07	0.0337		-0.0852	0.0541	0.115	0.0088549
8	140587112	A	G	-0.0682	1.39e-23		-0.0749	0.00807	1.8e-20	0.773		-0.0517	0.0127	4.72e-05	0.8195
8	141190368	G	A	-0.0384	1.16e-09		-0.0397	0.00766	2.2e-07	0.278		-0.0356	0.0111	0.00135	0.27007
9	3857583	G	A	0.545	5.68e-10		0.545	0.0879	5.68e-10	0.00126		NA	NA	NA	NA
9	4221298	A	C	-0.052	1.64e-17		-0.064	0.00727	1.29e-18	0.68		-0.0232	0.0112	0.0389	0.74344
9	4290544	T	C	-0.0564	1.03e-23		-0.0676	0.00682	3.69e-23	0.544		-0.0327	0.00989	0.000934	0.58433
9	5438435	C	A	0.0478	5.14e-12		0.0264	0.00828	0.00141	0.225		0.0981	0.0127	1.05e-14	0.20789
9	5525775	A	G	-0.0338	1.13e-08		-0.0373	0.00719	2.12e-07	0.366		-0.0264	0.0104	0.0112	0.43339
9	21576592	A	C	-0.0611	4.37e-24		-0.0458	0.00744	7.3e-10	0.705		-0.0906	0.0103	1.81e-18	0.66129
9	21632813	A	G	0.101	2.46e-16		0.0845	0.0166	3.39e-07	0.043		0.122	0.0184	4.43e-11	0.077927
9	95781499	GCA	G	-0.122	7.91e-12		-0.122	0.0179	7.91e-12	0.0406		NA	NA	NA	NA
9	96322658	G	A	0.046	2.83e-09		0.0429	0.00905	2.1e-06	0.169		0.0546	0.015	0.000274	0.12245
9	97796811	C	T	0.239	4.94e-324		0.246	0.00728	1.64e-250	0.653		0.224	0.0105	2.42e-101	0.65671
9	99067260	G	A	0.0459	1.22e-10		0.0504	0.00897	1.93e-08	0.172		0.0381	0.0117	0.00116	0.22355
9	99427621	C	T	-0.0386	3.67e-08		-0.0484	0.00885	4.58e-08	0.184		-0.0221	0.0115	0.054	0.23906
9	107841065	G	C	0.0619	1.27e-12		0.0532	0.00962	3.1e-08	0.145		0.102	0.0207	8.33e-07	0.059848
9	107875268	C	T	-0.0532	1.25e-10		-0.0364	0.0108	0.000739	0.117		-0.0771	0.0129	2.08e-09	0.1757
9	114760300	C	A	0.0354	7.01e-10		0.0427	0.00694	7.52e-10	0.405		0.0196	0.0103	0.0567	0.34996
9	124267351	A	G	0.0809	9.95e-46		0.0917	0.00693	5.64e-40	0.402		0.0583	0.01	5.96e-09	0.38594
9	125354538	A	G	-0.0345	6.3e-10		-0.0375	0.00681	3.59e-08	0.508		-0.0284	0.00977	0.00365	0.46822
9	128897445	T	C	-0.0633	2.19e-12		-0.0498	0.0112	8.74e-06	0.105		-0.0882	0.0152	6.5e-09	0.1196
10	3889686	C	T	0.0353	4.73e-08		0.0365	0.00781	2.96e-06	0.253		0.0328	0.0115	0.00454	0.23348
10	6056861	T	C	-0.0745	8.94e-39		-0.065	0.00705	3e-20	0.378		-0.0929	0.00979	2.41e-21	0.46699
10	6348230	G	C	0.0679	2.94e-22		0.0611	0.00866	1.64e-12	0.805		0.0808	0.0119	1.15e-11	0.78051
10	6471591	G	GA	0.06	2.22e-21		0.0612	0.00748	2.72e-16	0.29		0.0569	0.0118	1.43e-06	0.22061
10	8563235	G	A	0.0669	1.55e-18		0.0665	0.00926	7.17e-13	0.163		0.0678	0.0134	3.97e-07	0.16822
10	14476200	C	T	-0.033	2.06e-08		-0.0312	0.00727	1.83e-05	0.332		-0.0366	0.01	0.000269	0.39468
10	32276910	T	C	0.0517	4.29e-08		0.0394	0.0121	0.00118	0.0856		0.0704	0.015	2.63e-06	0.12134
10	62020112	C	T	0.104	4.95e-48		0.0906	0.00872	2.8e-25	0.185		0.132	0.0125	4.63e-26	0.19332
10	62297443	A	G	-0.0668	2.08e-31		-0.0609	0.00703	4.69e-18	0.626		-0.0782	0.00986	2.12e-15	0.54869
10	71376162	G	A	0.0521	2.92e-09		0.0513	0.0103	6.92e-07	0.872		0.0543	0.0167	0.00112	0.90557
10	79307723	C	G	0.0332	5.19e-09		0.0249	0.00688	0.000294	0.467		0.0513	0.0101	4.07e-07	0.40879
10	88089762	A	G	-0.0412	7.32e-13		-0.0438	0.00696	2.96e-10	0.428		-0.0355	0.0101	0.000474	0.40474
10	88230764	G	A	-0.0383	5.68e-10		-0.0362	0.00761	1.89e-06	0.722		-0.0422	0.0106	6.55e-05	0.69192
10	88998030	A	C	-0.031	3.89e-08		-0.0292	0.00684	2.01e-05	0.466		-0.0348	0.00994	0.000468	0.41336
10	99523573	C	A	-0.0757	4.79e-39		-0.076	0.00714	1.76e-26	0.652		-0.0752	0.00992	3.44e-14	0.56634
10	101130337	T	G	-0.0319	3.29e-08		-0.0272	0.00686	7.55e-05	0.459		-0.0433	0.0107	4.91e-05	0.30565
10	101733469	T	C	0.0348	6.11e-10		0.0362	0.00684	1.14e-07	0.514		0.0319	0.00993	0.00133	0.57147
10	113588287	G	A	0.0959	1.27e-09		0.0726	0.0208	0.000489	0.0272		0.128	0.0243	1.44e-07	0.043801
10	122389836	C	T	-0.0494	1.95e-16		-0.0434	0.00755	9.28e-09	0.29		-0.0599	0.00992	1.6e-09	0.41485
10	132537901	CAGCG	C	0.0752	3.05e-10		0.0616	0.0145	2.18e-05	0.0582		0.104	0.021	8.01e-07	0.057901
11	308290	T	C	-0.0354	4.05e-10		-0.0278	0.00684	4.89e-05	0.482		-0.0519	0.0101	2.6e-07	0.56575
11	640349	G	A	-0.052	4.69e-15		-0.0466	0.00819	1.32e-08	0.23		-0.0622	0.0113	3.61e-08	0.26533
11	9770097	C	T	0.0393	6.49e-10		0.0296	0.00816	0.000289	0.77		0.0545	0.0102	8.51e-08	0.63513
11	10509469	T	C	0.132	1.04e-13		0.128	0.0191	2.42e-11	0.0313		0.154	0.0466	0.000922	0.011254
11	35243666	T	TCAAA	0.0685	2.82e-32		0.0562	0.00708	2.03e-15	0.359		0.093	0.01	1.98e-20	0.38912
11	47408641	T	TCGC	0.0388	7.71e-11		0.0325	0.00727	7.69e-06	0.326		0.052	0.0105	6.89e-07	0.31896
11	57430308	G	A	-0.0382	5.74e-09		-0.0391	0.00787	6.91e-07	0.252		-0.0362	0.0119	0.00226	0.21785
11	61128363	A	G	-0.0326	9.58e-09		-0.0225	0.00699	0.00127	0.612		-0.0522	0.00976	8.7e-08	0.49843
11	64340005	T	C	-0.043	1.24e-13		-0.032	0.00702	5.12e-06	0.385		-0.0667	0.0103	9.61e-11	0.34285
11	72814897	G	T	-0.0375	1.77e-10		-0.0341	0.00722	2.28e-06	0.34		-0.0439	0.0101	1.32e-05	0.37762
11	86354173	C	T	0.0606	1.35e-09		0.0645	0.013	6.62e-07	0.0734		0.055	0.0157	0.000468	0.10781
11	86360905	A	G	-0.0398	1.45e-11		-0.0416	0.00716	6.06e-09	0.359		-0.036	0.0104	0.000537	0.33256
11	94179472	A	G	-0.0779	3.41e-14		-0.0613	0.0123	6e-07	0.0859		-0.116	0.0187	5.14e-10	0.074064
11	95550310	C	T	-0.0359	2.66e-10		-0.0233	0.0069	0.000745	0.429		-0.0627	0.01	4.18e-10	0.39485
11	95578258	T	C	0.105	1.2e-45		0.0831	0.00905	4.19e-20	0.166		0.152	0.013	2.68e-31	0.17138
11	111776191	T	A	0.0349	6.07e-09		0.0372	0.00736	4.31e-07	0.685		0.0304	0.0104	0.00346	0.6666
11	115182291	A	G	0.0501	4.88e-19		0.0493	0.00685	6.47e-13	0.542		0.0517	0.00981	1.33e-07	0.54006
11	116863829	G	A	0.0392	1.29e-10		0.0303	0.00752	5.7e-05	0.289		0.0561	0.0104	6.53e-08	0.33974
11	117212250	G	A	-0.0956	7.6e-23		-0.0824	0.0116	1.18e-12	0.0989		-0.127	0.0178	1.11e-12	0.08352
11	118392339	G	A	0.0485	5.03e-12		0.0452	0.00838	6.92e-08	0.205		0.0564	0.0129	1.23e-05	0.17381
11	118709639	C	T	-0.0418	2.12e-13		-0.041	0.00693	3.26e-09	0.415		-0.0433	0.00996	1.38e-05	0.40615
11	128286419	A	G	0.0379	4.31e-11		0.0351	0.00697	4.84e-07	0.601		0.0439	0.0102	1.57e-05	0.63947
12	519821	G	C	0.104	1.63e-08		0.104	0.0185	1.63e-08	0.0351		NA	NA	NA	NA
12	642348	A	G	0.0471	3.04e-15		0.0478	0.00731	6.3e-11	0.317		0.0459	0.0104	9.89e-06	0.33644
12	6773332	C	A	0.63	1.67e-09		0.63	0.104	1.67e-09	0.00098		NA	NA	NA	NA
12	9770056	A	C	0.1	4.8e-57		0.0831	0.00768	3.14e-27	0.261		0.136	0.011	6.55e-35	0.27428
12	11899768	G	A	0.0358	2.23e-10		0.0315	0.00686	4.41e-06	0.501		0.0451	0.00997	6.16e-06	0.53171
12	12419614	T	C	0.0372	8.74e-11		0.0284	0.00697	4.62e-05	0.395		0.0554	0.0101	3.59e-08	0.3852
12	42004617	C	T	-0.0314	2.37e-08		-0.028	0.00686	4.37e-05	0.55		-0.0385	0.00987	9.58e-05	0.56798
12	46093639	A	G	-0.0528	3.11e-10		-0.0613	0.01	9.17e-10	0.138		-0.0327	0.0153	0.0328	0.1155
12	47763920	C	T	0.0903	2.03e-19		0.0906	0.0119	2.24e-14	0.0886		0.0896	0.0187	1.7e-06	0.075235
12	56041720	G	C	0.0758	4.41e-37		0.0768	0.00728	5.43e-26	0.318		0.0737	0.0103	1.05e-12	0.34083
12	56182198	T	G	0.31	6.88e-12		0.31	0.0452	6.88e-12	0.00521		NA	NA	NA	NA
12	56627222	T	C	0.0446	5.73e-14		0.0536	0.00732	2.38e-13	0.317		0.0273	0.0101	0.0071	0.3668
12	57570834	G	A	-0.0393	4.4e-12		-0.0392	0.00685	1.07e-08	0.509		-0.0395	0.0101	9.55e-05	0.36853
12	68040679	T	C	-0.093	1.81e-08		-0.0667	0.0218	0.00222	0.0257		-0.128	0.0253	3.94e-07	0.039882
12	96200749	G	A	0.135	2.8e-09		0.186	0.0358	1.92e-07	0.00881		0.1	0.0293	0.000633	0.029005
12	103313022	T	A	-0.0378	1.92e-11		-0.0346	0.00684	4.29e-07	0.524		-0.0447	0.00995	6.99e-06	0.56558
12	103499163	G	T	-0.0582	1.03e-21		-0.0445	0.00729	1.04e-09	0.676		-0.0896	0.011	4.4e-16	0.72893
12	111446804	T	C	-0.184	9.07e-234		-0.161	0.0069	1.83e-120	0.595		-0.23	0.00977	1.44e-122	0.51866
12	112651836	A	C	0.0396	6.5e-12		0.021	0.00703	0.00286	0.609		0.0779	0.0101	1.07e-14	0.61793
12	114636008	A	C	0.038	1.43e-11		0.0285	0.00685	3.06e-05	0.523		0.0576	0.00986	5.22e-09	0.56991
13	24212218	T	C	0.0887	2.28e-48		0.0694	0.00733	2.78e-21	0.31		0.131	0.0108	1.45e-33	0.28873
13	28029870	T	C	0.362	5.55e-47		0.282	0.0299	3.33e-21	0.0126		0.558	0.0467	7.25e-33	0.012898
13	28138552	C	G	0.136	4.89e-12		0.141	0.0282	5.7e-07	0.0145		0.131	0.0275	1.82e-06	0.035446
13	31889992	AACAAT	A	0.0329	1.37e-08		0.0333	0.00707	2.49e-06	0.631		0.032	0.0101	0.00151	0.62086
13	40569053	G	A	0.0541	3.2e-16		0.0531	0.00807	4.47e-11	0.231		0.0562	0.0116	1.37e-06	0.23045
13	40810596	G	C	-0.0745	1.61e-11		-0.0941	0.0149	2.85e-10	0.0575		-0.0506	0.0164	0.0021	0.097841
13	42422412	G	T	0.0538	4.54e-21		0.039	0.00703	2.89e-08	0.616		0.0825	0.0098	3.58e-17	0.53645
13	42574410	C	G	0.0903	9.51e-10		0.0701	0.0171	4.03e-05	0.0413		0.15	0.0294	3.22e-07	0.030228
13	50237019	G	T	0.0902	9.81e-14		0.0856	0.0168	3.27e-07	0.0422		0.0954	0.0176	5.62e-08	0.084052
13	50586868	G	A	-0.0421	1.97e-11		-0.0478	0.00739	9.59e-11	0.697		-0.0273	0.0119	0.0219	0.78759
13	74119264	G	A	-0.0513	2.79e-10		-0.053	0.0102	2.12e-07	0.132		-0.0483	0.0134	0.000316	0.15968
13	99353731	C	CA	-0.0454	8.33e-15		-0.0386	0.00714	6.29e-08	0.357		-0.0591	0.0102	6.49e-09	0.37238
13	110553879	G	A	-0.0536	1.34e-14		-0.0447	0.00868	2.67e-07	0.196		-0.0697	0.0116	2.18e-09	0.23323
14	34757605	C	T	-0.0496	5.52e-10		-0.0494	0.0092	7.98e-08	0.168		-0.0503	0.0162	0.00187	0.10461
14	36140472	G	A	-0.054	8.94e-21		-0.0516	0.00709	3.57e-13	0.641		-0.0587	0.00994	3.55e-09	0.58936
14	36269155	C	T	-0.186	1.56e-30		-0.204	0.0209	1.28e-22	0.0303		-0.158	0.0255	6.66e-10	0.038963
14	68286570	T	G	0.0565	3.55e-20		0.0561	0.00745	4.93e-14	0.696		0.0575	0.0109	1.27e-07	0.71973
14	74980176	C	G	0.032	1.61e-08		0.0237	0.00691	0.000599	0.573		0.049	0.0099	7.25e-07	0.55386
14	80649689	A	T	-0.103	4.74e-10		-0.0928	0.0192	1.42e-06	0.0345		-0.135	0.033	4.26e-05	0.02429
14	80982607	G	GA	-0.0957	6.33e-17		-0.108	0.014	1.3e-14	0.939		-0.0712	0.0199	0.000357	0.93498
14	93097224	C	A	0.0781	1.02e-27		0.0889	0.00875	3.12e-24	0.18		0.0563	0.0124	5.9e-06	0.19235
14	98202441	AAG	A	0.0505	1.6e-11		0.0384	0.00958	6.16e-05	0.148		0.0698	0.0121	7.01e-09	0.2096
14	98224057	A	T	0.0353	3.64e-10		0.0219	0.00687	0.00142	0.556		0.0624	0.0098	1.9e-10	0.47559
14	104752139	A	G	-0.0432	1.18e-14		-0.0461	0.00682	1.42e-11	0.504		-0.0374	0.00983	0.000144	0.44398
14	105759223	C	T	0.0502	1.37e-16		0.0422	0.00731	7.48e-09	0.39		0.0682	0.0109	4.59e-10	0.33245
15	38551686	A	G	0.0691	2.25e-27		0.0526	0.00772	9.7e-12	0.262		0.105	0.0113	2.19e-20	0.25028
15	63373566	T	C	0.0517	4e-16		0.0509	0.0077	4.04e-11	0.264		0.0534	0.0112	1.92e-06	0.2531
15	63618234	G	T	-0.0346	2.02e-09		-0.0333	0.00689	1.28e-06	0.573		-0.0376	0.0106	0.000383	0.6835
15	65451289	G	A	-0.0383	1.05e-09		-0.0391	0.00752	2.02e-07	0.294		-0.0364	0.0114	0.00136	0.2445
15	84712154	T	C	-0.0353	3.43e-10		-0.0373	0.00685	4.9e-08	0.458		-0.031	0.00982	0.00162	0.44681
15	88570646	T	C	-0.0459	1.23e-14		-0.0453	0.00722	3.52e-10	0.337		-0.0471	0.0105	7.14e-06	0.32136
16	2689766	G	C	-0.0333	4.39e-09		-0.0315	0.00693	5.49e-06	0.577		-0.037	0.0099	0.000184	0.52824
16	3972637	T	C	0.057	8.14e-15		0.0656	0.00879	8.34e-14	0.18		0.0372	0.0134	0.00539	0.15987
16	11734162	A	G	0.0489	1e-09		0.0465	0.00967	1.5e-06	0.851		0.0543	0.0143	0.00015	0.8632
16	14306452	G	A	-0.0425	6.8e-14		-0.0487	0.00692	1.87e-12	0.586		-0.0297	0.00989	0.0027	0.57372
16	27384341	C	CT	0.173	2.17e-34		0.173	0.0141	2.17e-34	0.0582		NA	NA	NA	NA
16	28494339	G	C	0.0791	3.83e-21		0.0873	0.0103	1.75e-17	0.123		0.0627	0.0146	1.64e-05	0.12908
16	31429111	G	C	-0.0333	4.96e-08		-0.0325	0.00755	1.7e-05	0.288		-0.035	0.0104	0.000789	0.32955
16	50301163	C	A	0.351	4.66e-30		0.298	0.035	1.67e-17	0.00872		0.534	0.065	2.13e-16	0.0060336
16	50325014	G	C	-0.0622	5.87e-17		-0.0569	0.00926	8.21e-10	0.165		-0.072	0.0125	8.1e-09	0.18872
16	57041268	A	G	-0.0422	7.73e-14		-0.0379	0.0069	4.04e-08	0.565		-0.051	0.00982	2.11e-07	0.47736
16	57533494	C	G	0.0428	7.05e-13		0.0377	0.00713	1.23e-07	0.349		0.0543	0.0108	5.16e-07	0.28704
16	67628912	T	A	0.105	1.18e-13		0.0771	0.0175	1.07e-05	0.039		0.158	0.024	5.55e-11	0.0439
16	68100299	G	A	0.182	3.97e-09		0.162	0.0498	0.00114	0.00443		0.194	0.0393	8.23e-07	0.016486
16	79282918	A	G	-0.0564	1.98e-15		-0.0407	0.00891	4.87e-06	0.824		-0.0836	0.0117	1.11e-12	0.77629
16	79716284	C	CA	0.0791	7.37e-28		0.0791	0.00723	7.37e-28	0.657		NA	NA	NA	NA
16	85934034	A	G	0.0387	1.64e-11		0.0363	0.00697	1.96e-07	0.39		0.0437	0.0101	1.56e-05	0.37203
16	85985910	G	C	-0.0355	2.89e-08		-0.0259	0.00761	0.000661	0.282		-0.0589	0.0119	6.78e-07	0.23108
16	88458157	C	T	0.0375	6.94e-10		0.0392	0.00743	1.37e-07	0.299		0.0342	0.0106	0.00125	0.30727
17	7337072	C	T	0.077	1.28e-28		0.0751	0.00866	4.19e-18	0.188		0.0805	0.0116	4.1e-12	0.24803
17	7826527	C	A	0.0535	2.64e-08		0.0426	0.0116	0.000251	0.0934		0.0769	0.0171	6.55e-06	0.090676
17	7863943	G	A	-0.0815	2.19e-08		-0.0679	0.0161	2.39e-05	0.0482		-0.144	0.0345	2.89e-05	0.020686
17	8961373	A	G	0.0678	5.95e-20		0.0588	0.00888	3.59e-11	0.815		0.0883	0.0134	5.02e-11	0.8416
17	29618321	T	C	0.0332	2.77e-09		0.0337	0.00681	7.49e-07	0.502		0.0322	0.00978	0.00098	0.49767
17	39787478	C	A	-0.0981	1.61e-11		-0.102	0.0174	3.94e-09	0.0423		-0.0885	0.0268	0.000948	0.03457
17	39822742	C	T	0.0512	4.71e-09		0.0474	0.00989	1.67e-06	0.136		0.0651	0.0187	0.000515	0.075242
17	42137394	T	C	0.0824	2.17e-31		0.0777	0.00839	2.05e-20	0.203		0.0939	0.0131	8.43e-13	0.16552
17	46019187	G	A	0.0532	5.63e-10		0.0668	0.0124	7.72e-08	0.081		0.0409	0.0119	0.000582	0.22033
17	47727128	C	T	0.07	1.74e-29		0.0547	0.00746	2.24e-13	0.292		0.105	0.0112	1.04e-20	0.25631
17	47733988	C	G	-0.119	7.88e-27		-0.108	0.0138	4.7e-15	0.0691		-0.139	0.0187	9.54e-14	0.0759
17	61253946	A	C	-0.0739	1.3e-10		-0.0863	0.0143	1.5e-09	0.0635		-0.051	0.0194	0.00849	0.06891
17	75767839	TGA	T	0.0658	1.38e-12		0.0689	0.012	1.07e-08	0.0853		0.0612	0.0146	2.63e-05	0.13063
17	77116349	A	G	0.0618	8.21e-10		0.0666	0.0125	9.15e-08	0.0799		0.0528	0.017	0.00196	0.090429
17	82550914	C	T	-0.0409	8.45e-13		-0.0383	0.00692	3.07e-08	0.594		-0.0463	0.0101	4.74e-06	0.63276
18	12797695	A	G	0.0475	6.67e-16		0.0347	0.00717	1.26e-06	0.343		0.0735	0.0103	7.78e-13	0.34529
18	26082413	A	G	-0.0402	2.76e-11		-0.0325	0.00729	8.58e-06	0.326		-0.0572	0.0108	1.12e-07	0.29362
18	59514049	C	T	0.0401	8.13e-11		0.0423	0.00762	2.92e-08	0.719		0.0359	0.0105	0.000622	0.68498
18	62339745	C	G	-0.034	1.98e-09		-0.0248	0.00693	0.00035	0.575		-0.0524	0.00982	9.42e-08	0.53564
18	69860373	A	G	-0.0517	2.34e-20		-0.0438	0.00683	1.42e-10	0.536		-0.068	0.00977	3.34e-12	0.5251
18	79454594	G	A	0.0667	3.67e-18		0.0615	0.0092	2.27e-11	0.161		0.0785	0.0139	1.71e-08	0.14695
18	79516964	A	G	-0.041	3.37e-11		-0.0386	0.00769	5.29e-07	0.279		-0.0453	0.0104	1.26e-05	0.35583
19	1167159	A	G	-0.0378	2e-11		-0.0339	0.00685	7.39e-07	0.487		-0.0458	0.0099	3.65e-06	0.52061
19	3159173	C	T	-0.0505	8.08e-09		-0.0569	0.0104	4.12e-08	0.127		-0.0347	0.0164	0.0346	0.099733
19	3179519	C	T	-0.0948	1.12e-10		-0.0888	0.0155	9.43e-09	0.0546		-0.151	0.0472	0.0014	0.010928
19	4837475	A	G	-0.0668	2.12e-31		-0.0541	0.00696	7.33e-15	0.599		-0.0934	0.0101	2.17e-20	0.60154
19	7240765	G	T	-0.0746	9.37e-33		-0.0691	0.00734	4.39e-21	0.693		-0.089	0.012	1.04e-13	0.78557
19	8257849	G	T	-0.0893	2.34e-10		-0.101	0.0164	6.7e-10	0.0489		-0.0557	0.0276	0.0441	0.037809
19	8672590	A	ATTAG	-0.0493	2.34e-14		-0.046	0.00777	3.09e-09	0.266		-0.0565	0.0116	1.15e-06	0.23543
19	10101623	C	G	0.083	1.81e-08		0.0903	0.0163	3.18e-08	0.0443		0.0507	0.0343	0.14	0.023272
19	10352442	G	C	-0.16	1.17e-24		-0.13	0.0203	1.49e-10	0.0309		-0.202	0.0243	8.83e-17	0.046222
19	11416089	T	G	-0.0453	9.88e-16		-0.0465	0.0069	1.55e-11	0.576		-0.0428	0.00979	1.25e-05	0.52943
19	17047335	T	C	0.0322	1.01e-08		0.0304	0.00685	9.18e-06	0.535		0.0358	0.0098	0.000257	0.46583
19	18188028	AT	A	-0.0421	7.34e-11		-0.0402	0.00798	4.68e-07	0.758		-0.0456	0.011	3.38e-05	0.7084
19	18283951	A	G	0.0612	3.31e-25		0.0551	0.00725	3.1e-14	0.664		0.0732	0.0101	5.46e-13	0.63304
19	21537632	CA	C	0.154	5.24e-09		0.119	0.0395	0.00258	0.00724		0.182	0.0354	2.73e-07	0.02049
19	40278113	C	T	0.252	1.54e-15		0.252	0.0316	1.54e-15	0.0106		NA	NA	NA	NA
19	48703417	G	A	0.0424	1.07e-13		0.0343	0.00703	1.07e-06	0.374		0.0582	0.00979	2.73e-09	0.50848
19	49648429	T	A	0.0501	6.25e-19		0.047	0.00685	6.71e-12	0.456		0.0566	0.00993	1.18e-08	0.41007
19	49665663	G	A	-0.274	2.77e-10		-0.33	0.0685	1.49e-06	0.00313		-0.236	0.056	2.46e-05	0.007887
19	55228237	C	T	0.0567	1.4e-14		0.0578	0.00912	2.43e-10	0.165		0.0547	0.0125	1.19e-05	0.18914
19	57288250	T	C	-0.0319	1.29e-08		-0.0347	0.00683	3.85e-07	0.516		-0.0261	0.00983	0.0078	0.4534
20	17879062	A	G	-0.0598	2.08e-15		-0.0478	0.00964	7.01e-07	0.152		-0.0787	0.0121	7.55e-11	0.20787
20	22605190	T	G	0.086	2.91e-35		0.0998	0.00854	1.43e-31	0.792		0.0591	0.0119	6.95e-07	0.78518
20	33085232	A	T	0.077	1.27e-09		0.0772	0.0136	1.53e-08	0.0652		0.0762	0.0346	0.0277	0.02148
20	48764453	T	C	0.0336	6.92e-09		0.028	0.00702	6.78e-05	0.378		0.0455	0.0103	9.17e-06	0.34783
20	58891038	G	T	0.104	1.27e-08		0.099	0.0224	9.94e-06	0.0228		0.112	0.0312	0.000316	0.025851
21	15425772	G	T	-0.0465	5.03e-13		-0.0365	0.0081	6.77e-06	0.235		-0.0639	0.0106	1.83e-09	0.30413
21	25397195	T	C	-0.0469	6.25e-10		-0.0554	0.00904	8.91e-10	0.83		-0.0267	0.0139	0.0549	0.85418
21	25457465	C	T	-0.0858	1.68e-12		-0.0755	0.014	7e-08	0.0653		-0.117	0.0245	1.67e-06	0.042631
21	33380488	C	A	0.0355	3.63e-09		0.0318	0.00736	1.61e-05	0.308		0.043	0.0104	3.76e-05	0.32861
21	33658920	T	C	0.0317	1.73e-08		0.0288	0.00686	2.75e-05	0.542		0.0378	0.00984	0.000122	0.55438
21	42405613	G	C	0.0336	2.8e-08		0.0293	0.00747	8.49e-05	0.296		0.0418	0.0103	5.24e-05	0.33718
21	42431928	T	C	0.0408	8.38e-13		0.033	0.00693	1.91e-06	0.579		0.0571	0.01	1.24e-08	0.59816
22	21862666	A	T	-0.0387	1.86e-08		-0.0324	0.00858	0.000158	0.2		-0.0499	0.0115	1.42e-05	0.24112
22	29579458	A	G	-0.0422	8.35e-10		-0.0406	0.00855	2.01e-06	0.804		-0.045	0.0115	9.77e-05	0.76694
22	30116269	G	A	-0.0722	5.16e-38		-0.0637	0.00682	9.49e-21	0.523		-0.0898	0.00982	5.95e-20	0.44409
22	31146151	A	G	-0.0401	1.67e-09		-0.0433	0.00825	1.54e-07	0.782		-0.0341	0.0112	0.00238	0.74686
22	37187692	G	GC	0.0908	1.32e-57		0.078	0.00693	2.17e-29	0.399		0.117	0.0099	3.2e-32	0.42447
22	38700597	T	C	0.0422	1.43e-13		0.0409	0.00695	4.17e-09	0.399		0.045	0.01	6.85e-06	0.3935
22	39351775	G	A	0.0444	1.06e-13		0.0388	0.00724	8.08e-08	0.326		0.0565	0.0106	1.01e-07	0.30095
22	40339359	AT	A	-0.0427	3.25e-10		-0.0516	0.0082	3.12e-10	0.225		-0.0232	0.0121	0.0557	0.22246
22	41428193	A	AAAT	0.0457	6.01e-12		0.0396	0.00793	5.71e-07	0.751		0.0602	0.0122	8.18e-07	0.79442
23	3694421	T	A	0.0363	3.45e-12		0.0444	0.00631	2e-12	0.391		0.0188	0.00925	0.042	0.3888
23	13002332	A	G	-0.0343	1.39e-11		-0.0343	0.00617	2.7e-08	0.497		-0.0345	0.00897	0.000121	0.49637
23	66072480	G	GTGTTTGTT	-0.0386	1.1e-08		-0.0329	0.00788	2.9e-05	0.801		-0.0541	0.0131	3.55e-05	0.86043
23	78993122	C	T	-0.0557	2.2e-14		-0.0469	0.00843	2.73e-08	0.162		-0.0816	0.0145	1.76e-08	0.10769
23	79185670	A	C	-0.055	3.53e-26		-0.0457	0.00634	5.66e-13	0.629		-0.0743	0.0091	3.1e-16	0.5957
23	154018741	A	G	-0.0441	1.6e-09		-0.0391	0.00861	5.68e-06	0.853		-0.0572	0.0139	3.64e-05	0.88209
23	155548829	G	A	-0.113	2.36e-08		-0.113	0.0202	2.36e-08	0.0265		NA	NA	NA	NA

## Sheet: ST 2 - PD1 protein
Concordant AIHT and PD-1 (PDCD1) protein level associations
AIHT index SNP	likely local gene	beta-AIHT	beta-PD-1	pval PD-1	PIP PD-1	notes
1-113834946-A-G	PTPN22	-0.35	-0.09	2.7e-14	0.7	PTPN22 missense
2-191105394-C-G	STAT4	-0.13	-0.05	2.3e-10		intronic
2-203880280-T-C	CTLA4	-0.15	-0.06	1.1e-14	0.02	CT60 variant
6-159047533-G-A	TAGAP	0.04	0.04	6.35e-07	0.012	intronic
12-111446804-T-C	SH2B3	-0.18	-0.11	1.2e-51	0.23	SH2B3 missense
13-28029870-T-C	FLT3	0.36	0.18	2.2e-08	0.61	low-frequency cryptic splice -> truncation (deCODE REF)
19-48703417-G-A	FUT2	0.04	0.04	1.3e-09	0.1	common Lewis null
6-159047533-G-A
	6-159047533-G-A

## Sheet: ST 3 - linemodels & metas
v	chrom	pos	ref	alt	AIHT_beta	AIHT_se	AIHT_pval		TSH_beta	TSH_se	TSH_pval		AInonT_beta	AInonT_se	AInonT_pval		C3skin_beta	C3skin_se	C3skin_pval		pShared_TSH	pShared_AInonT	pShared_SKIN
1:1238231:G:A	1	1238231	G	A	-0.0476	0.00786	1.38e-09		-0.0032	0.00690507	0.63996		0.00829	0.00736	0.26		0.00467	0.00839	0.578		0.001	0.0102	0.19965
1:2562891:G:A	1	2562891	G	A	0.0788	0.0084	6.82e-21		0.0131	0.00670197	0.0490026		0.0171	0.00808	0.0344		-0.00842	0.00897	0.348		0	0.47875	0.09945
1:2590765:G:T	1	2590765	G	T	-0.0396	0.00703	1.77e-08		-0.0092	0.00629579	0.141651		-0.038	0.00661	8.93e-09		0.00479	0.00761	0.529		0.00985	0.99975	0.25205
1:7884770:C:A	1	7884770	C	A	-0.115	0.0205	1.87e-08		-0.0734	0.0327991	0.0253578		0.0136	0.0176	0.439		0.0369	0.0236	0.118		0.3776	0.0121	0.6319
1:8437247:T:A	1	8437247	T	A	-0.035	0.00581	1.66e-09		0.0053	0.00467107	0.256073		-0.00118	0.00553	0.831		0.0209	0.00616	0.000701		0.0006	0.1182	0.94255
1:10683890:G:A	1	10683890	G	A	-0.0342	0.00565	1.43e-09		-0.01	0.00477262	0.0341033		-0.0177	0.00535	0.000928		-0.00479	0.00603	0.427		0.0169	0.94695	0.05185
1:12203862:C:T	1	12203862	C	T	-0.0519	0.00706	2.1e-13		-0.0076	0.00680352	0.263105		-0.0164	0.0066	0.0129		-0.00318	0.0076	0.676		0.00055	0.81485	0.0282
1:19445431:C:T	1	19445431	C	T	0.0834	0.00592	4.48e-45		0.0632	0.00487416	7.88e-39		-0.000866	0.00567	0.879		-0.0125	0.00632	0.0474		1	0	0.1303
1:19517082:A:G	1	19517082	A	G	-0.112	0.00839	1.03e-40		-0.114	0.00629579	4.97e-73		0.000544	0.00789	0.945		0.00629	0.00862	0.465		1	0	0.002
1:25001856:C:T	1	25001856	C	T	0.0501	0.00628	1.52e-15		0.0117	0.00558498	0.0352012		-0.00527	0.0059	0.372		-0.0206	0.00675	0.0023		0.0017	0.00385	0.93125
1:28193650:C:T	1	28193650	C	T	-0.0341	0.0059	7.58e-09		-0.003	0.00487416	0.538755		-0.0251	0.0056	7.22e-06		0.0132	0.00626	0.0346		0.00295	0.9941	0.7041
1:37898603:G:A	1	37898603	G	A	-0.0469	0.00561	6.65e-17		-0.0073	0.00487416	0.140225		-0.0178	0.00531	0.00078		0.0185	0.00599	0.00201		0.00055	0.9507	0.9274
1:38151199:C:A	1	38151199	C	A	-0.0412	0.00646	1.94e-10		-0.0032	0.00538189	0.556086		-0.026	0.00615	2.29e-05		-0.00398	0.00687	0.562		0.0009	0.99445	0.04795
1:39929497:A:G	1	39929497	A	G	0.0373	0.00629	3.19e-09		0.0028	0.00528034	0.592901		-0.00529	0.00598	0.377		0.00759	0.00675	0.261		0.00185	0.0271	0.0332
1:51075821:C:CA	1	51075821	C	CA	0.0901	0.0145	4.74e-10		0.1775	0.062044	0.0042453		-0.00426	0.0129	0.741		0.0106	0.0188	0.573		0.6465	0.01525	0.0625
1:53909897:C:A	1	53909897	C	A	-0.0432	0.00561	1.32e-14		-0.0088	0.00477262	0.0621612		0.000299	0.00532	0.955		-0.000504	0.00599	0.933		0.0014	0.03015	0.05375
1:59705533:A:G	1	59705533	A	G	0.0553	0.00968	1.13e-08		-0.0006	0.00792052	0.938055		0.000763	0.0095	0.936		-0.00366	0.01	0.716		0.0002	0.08065	0.16235
1:61144924:G:GAC	1	61144924	G	GAC	0.0974	0.0173	1.77e-08		-0.1432	0.0109669	9.5e-39		-0.00959	0.0171	0.574		-0.0142	0.0169	0.403		1	0.0285	0.2906
1:61208380:T:G	1	61208380	T	G	-0.0327	0.00564	6.46e-09		-0.0245	0.00477262	2.67e-07		-0.00355	0.00534	0.507		0.00948	0.00601	0.115		0.91065	0.2289	0.52575
1:64989483:G:C	1	64989483	G	C	0.0755	0.0117	1.27e-10		0.0115	0.00893597	0.196627		0.043	0.0113	0.00014		-0.018	0.0123	0.145		0.00015	0.9968	0.51185
1:64989794:C:A	1	64989794	C	A	0.0796	0.00903	1.27e-18		0.017	0.00802206	0.0338498		0.0346	0.00847	4.51e-05		-0.00114	0.00962	0.906		5e-05	0.998	0.02105
1:67273905:A:C	1	67273905	A	C	0.0387	0.00689	2.05e-08		0.0013	0.00528034	0.807317		0.00205	0.00666	0.758		-0.0052	0.0072	0.47		0.00165	0.1453	0.2667
1:67327488:C:G	1	67327488	C	G	0.059	0.0089	3.44e-11		0.0089	0.00649889	0.170408		0.0114	0.00884	0.197		-0.0059	0.00903	0.514		0.0002	0.361	0.1672
1:77984833:C:A	1	77984833	C	A	0.0518	0.00838	6.14e-10		0.0138	0.00781897	0.0754132		0.0285	0.00795	0.000339		0.0248	0.00905	0.00608		0.00665	0.98875	0.00215
1:101270361:C:T	1	101270361	C	T	-0.032	0.00585	4.32e-08		0.0011	0.00487416	0.826931		-0.0117	0.0055	0.0327		0.0189	0.00632	0.00272		0.0024	0.72205	0.89035
1:107819547:GAC:G	1	107819547	GAC	G	0.227	0.00889	2.6e-143		0.1101	0.00842824	3.13e-39		-0.0177	0.00855	0.0379		0.0211	0.00988	0.0329		0.9997	0	0
1:109804203:G:A	1	109804203	G	A	0.0364	0.00662	3.7e-08		-0.0012	0.00578807	0.841121		-0.00167	0.00631	0.791		0.0168	0.00703	0.0171		0.00175	0.0783	0.0114
1:109813390:T:G	1	109813390	T	G	0.0395	0.00567	3.29e-12		0.0032	0.00467107	0.500793		0.00127	0.00539	0.813		0.014	0.00605	0.021		0.0005	0.07565	0.00465
1:111154187:GTATTTTATTTTATTTTATTTTATTT:G	1	111154187	GTATTTTATTTTATTTTATTTTATTT	G	-0.0871	0.0132	3.49e-11		NA	NA	NA		-0.0377	0.0113	0.000829		-0.00866	0.0165	0.599		NA	0.9888	0.04675
1:113834946:A:G	1	113834946	A	G	-0.347	0.00808	4.94e-324		-0.0284	0.00792052	0.000363124		-0.162	0.0076	5.04e-101		0.0849	0.00922	3.27e-20		0	1	1
1:116769497:A:G	1	116769497	A	G	-0.0453	0.00786	8.58e-09		0.0046	0.00863133	0.595077		-0.0269	0.00717	0.000171		0.0254	0.00893	0.00441		0.0007	0.98845	0.9102
1:149671787:A:T	1	149671787	A	T	-0.237	0.0408	6.51e-09		NA	NA	NA		0.000771	0.0333	0.982		0.0554	0.0484	0.252		NA	0.08905	0.50895
1:150715890:AAT:A	1	150715890	AAT	A	-0.036	0.0056	1.35e-10		NA	NA	NA		-0.012	0.0053	0.0241		-0.0271	0.00598	5.86e-06		NA	0.7332	0.00135
1:156825994:A:G	1	156825994	A	G	-0.0597	0.00583	1.44e-24		-0.0025	0.00487416	0.614261		-0.0338	0.00551	8.51e-10		0.0141	0.00627	0.0243		0	1	0.629
1:157764025:A:G	1	157764025	A	G	0.0334	0.00562	2.99e-09		0.0112	0.00497571	0.0246443		0.000477	0.00533	0.929		0.00919	0.00601	0.126		0.0316	0.1081	0.0258
1:160460999:C:CAG	1	160460999	C	CAG	-0.0539	0.0097	2.83e-08		-0.0082	0.0125916	0.514576		0.00452	0.00921	0.624		0.0146	0.0101	0.15		0.0077	0.03325	0.5347
1:167457187:G:A	1	167457187	G	A	0.0467	0.00621	5.35e-14		0.0004	0.00487416	0.941404		-0.00779	0.00601	0.194		0.0238	0.00647	0.000241		5e-05	0.00375	0.00025
1:168544770:C:T	1	168544770	C	T	0.0437	0.00587	8.99e-14		0.003	0.00741279	0.686678		-0.00141	0.00552	0.798		-0.0352	0.00637	3.26e-08		0.00075	0.0232	0.9994
1:185182538:G:A	1	185182538	G	A	0.0357	0.00584	1.03e-09		-0.0023	0.00477262	0.627607		0.00742	0.00555	0.181		0.00341	0.00624	0.584		0.00075	0.40645	0.06575
1:198684045:A:G	1	198684045	A	G	-0.0664	0.0103	1.01e-10		0.0022	0.00771743	0.776854		-0.0333	0.00996	0.000825		0.0139	0.0105	0.187		0	0.98705	0.43025
1:198977059:C:T	1	198977059	C	T	0.054	0.00594	1e-19		0.0129	0.00487416	0.0075929		0.0247	0.00565	1.25e-05		0.00314	0.00631	0.618		0.0004	0.99685	0.0097
1:200228410:A:G	1	200228410	A	G	-0.033	0.00562	4.13e-09		-0.0106	0.00477262	0.0259218		-0.00614	0.00534	0.25		0.00251	0.00599	0.675		0.02635	0.35825	0.20345
1:200858418:C:CT	1	200858418	C	CT	0.0651	0.00836	7.14e-15		0.0002	0.00731125	0.980304		0.0289	0.0079	0.000251		0.00145	0.00906	0.872		0	0.9911	0.03005
1:206477509:C:CA	1	206477509	C	CA	-0.0509	0.00778	6.1e-11		-0.0017	0.00680352	0.807317		-0.013	0.00738	0.078		-0.00174	0.00842	0.836		0.00035	0.5702	0.0594
1:206989558:A:G	1	206989558	A	G	0.048	0.00597	8.81e-16		0.0198	0.00487416	4.43e-05		0.0107	0.00571	0.0598		-0.00524	0.00634	0.409		0.05355	0.46335	0.16385
1:212670845:T:C	1	212670845	T	C	0.0361	0.0056	1.2e-10		0.0088	0.00467107	0.0583532		0.00127	0.0053	0.811		0.00783	0.006	0.192		0.0075	0.1005	0.0248
1:212801014:A:G	1	212801014	A	G	-0.0344	0.00605	1.31e-08		-0.0033	0.00487416	0.491569		-0.00624	0.0058	0.282		-0.00788	0.0064	0.218		0.0037	0.3426	0.03495
1:218408167:T:C	1	218408167	T	C	-0.0394	0.00585	1.68e-11		0.0206	0.00487416	1.96e-05		0.00772	0.00551	0.161		-0.00868	0.00628	0.167		0.0004	0.0089	0.01745
1:236143235:A:C	1	236143235	A	C	0.0325	0.00558	5.91e-09		0.0036	0.00467107	0.448182		-0.0077	0.00529	0.146		-0.000543	0.00596	0.927		0.00455	0.0213	0.14875
1:236465834:C:A	1	236465834	C	A	0.05	0.00575	3.52e-18		0.0041	0.00761588	0.592109		-0.00259	0.00546	0.635		0.0193	0.00613	0.00166		0.0002	0.0055	0.0003
2:1403856:C:T	2	1403856	C	T	0.109	0.00563	6.04e-83		0.03	0.00467107	9.54e-11		-0.0055	0.00535	0.305		-0.00102	0.00604	0.865		0	0	0
2:8302118:G:A	2	8302118	G	A	-0.0442	0.00597	1.39e-13		-0.0029	0.00497571	0.567669		-0.00977	0.00561	0.0818		0.00832	0.00641	0.194		0.0002	0.4492	0.35515
2:12504610:C:T	2	12504610	C	T	-0.0695	0.00569	2.96e-34		-0.0023	0.00467107	0.628595		-0.0233	0.00538	1.52e-05		0.00812	0.00609	0.182		0	0.99305	0.07165
2:43282478:A:G	2	43282478	A	G	0.0461	0.00578	1.53e-15		0.0311	0.00477262	4.7e-11		-0.00111	0.00548	0.839		0.00746	0.00616	0.225		0.9878	0.01595	0.0074
2:48052438:G:C	2	48052438	G	C	0.0372	0.0062	2.05e-09		0.0112	0.00477262	0.0201475		0.00146	0.00598	0.808		-0.0182	0.00647	0.00487		0.01535	0.12385	0.8736
2:55631052:T:G	2	55631052	T	G	0.0839	0.0138	1.35e-09		0.0113	0.0101545	0.264209		-0.0121	0.0135	0.37		-0.00479	0.0143	0.738		0.00025	0.0101	0.1283
2:61177770:C:G	2	61177770	C	G	-0.0414	0.00608	9.77e-12		0.0009	0.00487416	0.849103		-0.0281	0.00579	1.16e-06		-0.00166	0.00644	0.796		0.0003	0.99765	0.0603
2:62232878:T:C	2	62232878	T	C	0.0592	0.0084	1.84e-12		0.0026	0.00700661	0.712342		0.0306	0.00797	0.000125		-0.00759	0.00903	0.401		5e-05	0.99475	0.21815
2:62304949:C:T	2	62304949	C	T	0.0447	0.00565	2.64e-15		0.0073	0.00477262	0.123186		0.0244	0.00534	4.86e-06		-0.0014	0.00605	0.817		0.00065	0.99755	0.0774
2:64690875:AATAGTGGC:A	2	64690875	AATAGTGGC	A	0.0505	0.0062	3.75e-16		0.0055	0.00568652	0.333015		0.0159	0.0058	0.00617		-0.00596	0.00679	0.38		0.00015	0.84915	0.1779
2:65377780:A:G	2	65377780	A	G	-0.0398	0.00609	6.92e-11		0.0031	0.00538189	0.566184		-0.00383	0.00573	0.504		0.00754	0.00662	0.255		0.0004	0.1595	0.3618
2:66425823:C:A	2	66425823	C	A	-0.0339	0.00593	1.09e-08		-0.0008	0.00487416	0.872059		-0.00937	0.00562	0.0955		-0.00611	0.00635	0.335		0.0022	0.55695	0.053
2:97658891:G:A	2	97658891	G	A	-0.054	0.00745	4.22e-13		-0.0165	0.00781897	0.036024		-0.0126	0.00668	0.0602		0.0176	0.00857	0.0404		0.00585	0.5292	0.7296
2:97890066:T:C	2	97890066	T	C	0.237	0.0235	7.6e-24		0.1796	0.128759	0.162901		0.116	0.0211	3.44e-08		-0.114	0.0318	0.000341		0.2497	1	0.99345
2:100705638:A:G	2	100705638	A	G	0.132	0.0225	3.96e-09		0.0914	0.0699646	0.191168		0.0612	0.0202	0.00241		-0.00581	0.028	0.836		0.2212	0.98065	0.1879
2:159764337:G:A	2	159764337	G	A	0.033	0.00587	1.85e-08		0.0051	0.00477262	0.282972		0.0101	0.00558	0.0713		0.00495	0.00625	0.429		0.0067	0.61185	0.06355
2:159963899:T:C	2	159963899	T	C	0.0422	0.00687	8.03e-10		0.007	0.00558498	0.211976		0.00746	0.00649	0.25		-0.016	0.00727	0.0276		0.0022	0.32505	0.7565
2:161244750:G:A	2	161244750	G	A	0.042	0.00577	3.38e-13		-0.0029	0.00487416	0.556581		0.00758	0.00546	0.165		-0.0164	0.00616	0.00764		0.0001	0.3154	0.8509
2:162267541:C:T	2	162267541	C	T	0.0675	0.0057	2.09e-32		0.0145	0.00477262	0.00258829		0.00691	0.00538	0.199		-0.0262	0.00608	1.66e-05		0	0.01665	0.99605
2:162268127:T:C	2	162268127	T	C	-0.225	0.0206	6.91e-28		-0.0275	0.0234569	0.239583		-0.0746	0.0192	9.97e-05		0.0863	0.0208	3.46e-05		0	0.999	0.99955
2:168728843:T:TA	2	168728843	T	TA	-0.0809	0.0146	2.79e-08		-0.1017	0.0219337	3.46e-06		-0.00518	0.0134	0.7		0.00806	0.0157	0.609		0.99715	0.1183	0.22255
2:172024450:A:G	2	172024450	A	G	-0.0505	0.00915	3.47e-08		-0.0128	0.0105607	0.223472		0.00565	0.00825	0.494		-0.0267	0.0104	0.0101		0.01485	0.02435	0.00595
2:173929212:G:A	2	173929212	G	A	-0.0315	0.00565	2.6e-08		-0.0099	0.00467107	0.0360134		-0.00304	0.00534	0.569		0.00623	0.00604	0.302		0.02855	0.2086	0.354
2:181279128:G:T	2	181279128	G	T	0.0515	0.0064	8.4e-16		0.0158	0.00538189	0.00329357		-0.00956	0.0061	0.117		-0.0127	0.00687	0.0647		0.00435	0.001	0.56985
2:191105394:C:G	2	191105394	C	G	-0.125	0.00661	9.82e-80		-0.0207	0.00548343	0.00017496		-0.0513	0.00627	2.88e-16		0.0281	0.00713	8.12e-05		0	1	0.94215
2:200176258:C:T	2	200176258	C	T	0.0402	0.00706	1.23e-08		0.0153	0.00649889	0.0192364		0.025	0.00663	0.000162		-0.00742	0.0077	0.335		0.04275	0.9874	0.34935
2:200872011:T:C	2	200872011	T	C	0.0567	0.00668	2.17e-17		0.0087	0.00568652	0.123289		0.016	0.0063	0.0111		0.00137	0.00726	0.851		0	0.7784	0.02095
2:201311672:G:A	2	201311672	G	A	-0.0358	0.0056	1.63e-10		-0.0032	0.00456953	0.486112		-0.0168	0.0053	0.00159		-0.0872	0.00598	3.99e-48		0.0017	0.9328	0.0001
2:202099464:C:T	2	202099464	C	T	0.0361	0.00619	5.17e-09		0.0035	0.00538189	0.51289		0.0067	0.00584	0.251		-0.014	0.00668	0.0365		0.0025	0.34515	0.7153
2:202499211:A:G	2	202499211	A	G	-0.0552	0.00787	2.29e-12		-0.0116	0.0072097	0.109474		-0.0195	0.00725	0.00725		0.0199	0.00861	0.0211		0.0013	0.89715	0.8156
2:203880280:T:C	2	203880280	T	C	-0.149	0.00575	6.26e-148		-0.013	0.00467107	0.00537329		-0.044	0.00544	5.85e-16		0.0464	0.00606	1.99e-14		0	1	1
2:213154257:C:G	2	213154257	C	G	-0.0458	0.00595	1.49e-14		-0.0119	0.00467107	0.0117906		-0.00373	0.00566	0.51		0.00861	0.00626	0.169		0.00215	0.0839	0.36245
2:216761868:G:T	2	216761868	G	T	0.0791	0.00595	2.76e-40		0.0956	0.00507725	2.63e-78		-0.00707	0.00554	0.202		0.00155	0.00644	0.81		1	0	0.0003
2:217372063:T:C	2	217372063	T	C	-0.0682	0.00598	4.45e-30		-0.0525	0.00568652	2.48e-20		0.0073	0.00556	0.189		-0.00323	0.00653	0.621		1	5e-05	0.00175
2:241255979:C:T	2	241255979	C	T	-0.0403	0.00646	4.32e-10		0.0006	0.00538189	0.915402		-0.00296	0.00613	0.629		0.0166	0.0068	0.0145		0.00055	0.1367	0.8146
2:241513201:C:T	2	241513201	C	T	-0.0438	0.00717	9.5e-10		-0.0046	0.00639734	0.471224		-0.0102	0.00669	0.128		0.0132	0.00772	0.0882		0.00155	0.4821	0.5962
3:4984323:A:G	3	4984323	A	G	0.0423	0.00659	1.27e-10		-0.0029	0.00599116	0.633932		-0.000593	0.00613	0.923		-0.0388	0.0073	1.08e-07		0.0003	0.05095	0.99895
3:12056168:TG:T	3	12056168	TG	T	-0.0781	0.0132	3.31e-09		NA	NA	NA		-0.00244	0.016	0.879		-0.0198	0.0112	0.0775		NA	0.1331	0.0027
3:12209924:G:A	3	12209924	G	A	-0.0842	0.00655	8.3e-38		-0.0553	0.00528034	1.31e-25		-0.0212	0.00627	0.000732		-0.0113	0.00698	0.106		1	0.85695	0
3:18241082:G:A	3	18241082	G	A	-0.0385	0.00633	1.21e-09		-0.0114	0.00528034	0.0296279		0.00426	0.00594	0.474		0.0151	0.0068	0.0267		0.01495	0.03225	0.7414
3:18676563:C:G	3	18676563	C	G	0.038	0.00605	3.28e-10		-0.0023	0.0051788	0.653891		0.0202	0.00569	0.000394		-0.00194	0.00652	0.766		0.00075	0.9702	0.15375
3:32310152:A:T	3	32310152	A	T	0.0516	0.00808	1.7e-10		NA	NA	NA		0.0206	0.00747	0.00583		-0.00858	0.00914	0.348		NA	0.91875	0.31635
3:36979158:T:C	3	36979158	T	C	-0.0406	0.00574	1.56e-12		-0.0107	0.00456953	0.0190004		-0.00653	0.00544	0.23		0.000504	0.00608	0.934		0.0054	0.26565	0.0889
3:39362837:A:T	3	39362837	A	T	0.236	0.0376	3.47e-10		0.0131	0.0279249	0.640158		0.0868	0.0379	0.0222		0.0213	0.0392	0.587		0.00025	0.90155	0.06675
3:39372033:C:T	3	39372033	C	T	0.0517	0.00659	4.44e-15		0.0101	0.00538189	0.0619636		0.0177	0.00629	0.00497		0.00598	0.00701	0.394		0.00035	0.8923	0.01215
3:45875055:TA:T	3	45875055	TA	T	0.0497	0.00668	1.04e-13		0.0002	0.00944369	0.982274		0.0216	0.00622	0.000516		-0.00911	0.00734	0.215		0.00025	0.9754	0.3549
3:58197909:G:A	3	58197909	G	A	0.0747	0.0111	1.7e-11		-0.0143	0.00944369	0.12962		0.0187	0.0108	0.0837		-0.0121	0.0115	0.294		0	0.59155	0.30065
3:58274272:A:G	3	58274272	A	G	0.0354	0.00573	6.41e-10		-0.0009	0.00467107	0.855803		0.015	0.00543	0.00576		-0.0114	0.00611	0.0632		0.00135	0.8778	0.6194
3:71436486:T:TC	3	71436486	T	TC	-0.0474	0.00726	6.41e-11		NA	NA	NA		0.0015	0.00695	0.829		0.086	0.00786	7.55e-28		NA	0.0374	1
3:98743259:G:A	3	98743259	G	A	0.0459	0.00632	4.01e-13		-0.006	0.0051788	0.252355		0.0147	0.00598	0.0138		-0.0383	0.00686	2.42e-08		5e-05	0.79595	0.99965
3:101852100:G:C	3	101852100	G	C	-0.179	0.0307	5.67e-09		0.012	0.0489447	0.806134		-0.0883	0.0261	0.000701		0.0658	0.0371	0.076		0.00515	0.9914	0.7085
3:105766711:T:C	3	105766711	T	C	0.0365	0.0058	3.21e-10		-0.0005	0.00487416	0.915599		0.0072	0.00545	0.187		-0.0303	0.00623	1.1e-06		0.00095	0.37455	0.9959
3:106216385:TA:T	3	106216385	TA	T	0.0775	0.00714	1.83e-27		0.0185	0.00903751	0.0400571		0.00817	0.00694	0.239		-0.0131	0.00744	0.0792		5e-05	0.0215	0.27005
3:108824113:G:A	3	108824113	G	A	-0.0628	0.00614	1.51e-24		0.0083	0.00528034	0.115107		-0.00772	0.00574	0.178		0.0197	0.00658	0.00281		0	0.05575	0.91755
3:119510639:G:A	3	119510639	G	A	0.0503	0.00666	4.32e-14		0.0213	0.00578807	0.000237083		-0.00382	0.00625	0.541		-0.0118	0.00725	0.104		0.0639	0.007	0.49565
3:122024312:C:A	3	122024312	C	A	0.0828	0.0133	4.37e-10		-0.0045	0.00964678	0.643715		0.00214	0.0132	0.871		-0.0527	0.0137	0.00012		0	0.0637	0.9927
3:141899991:G:A	3	141899991	G	A	-0.0483	0.00851	1.35e-08		-0.0018	0.00619425	0.770839		-0.018	0.00818	0.0274		-0.00712	0.00879	0.418		0.0004	0.80915	0.0391
3:149485791:T:TAAAAAC	3	149485791	T	TAAAAAC	-0.0433	0.00587	1.77e-13		-0.0312	0.00467107	1.8e-11		-0.000324	0.00557	0.954		-0.0101	0.00621	0.104		0.9935	0.04025	0.00615
3:152243543:C:T	3	152243543	C	T	0.127	0.0233	4.51e-08		0.032	0.12094	0.791446		0.00438	0.0209	0.834		-0.0287	0.0303	0.345		0.123	0.1041	0.43435
3:160653119:C:T	3	160653119	C	T	-0.035	0.0058	1.64e-09		-0.0025	0.00477262	0.599626		-0.0113	0.00547	0.0386		-0.00347	0.00621	0.576		0.0021	0.68515	0.0651
3:169759718:A:G	3	169759718	A	G	0.0358	0.00626	1.11e-08		-0.0035	0.0051788	0.498116		0.0046	0.00592	0.437		-0.0399	0.00674	3.35e-09		0.00105	0.25635	0.99935
3:185812502:T:C	3	185812502	T	C	-0.0494	0.00606	3.54e-16		-0.0481	0.00497571	1.64e-22		0.013	0.00572	0.0231		0.000558	0.00644	0.931		1	0.0003	0.04925
3:188407204:AC:A	3	188407204	AC	A	-0.115	0.00573	2.13e-89		-0.0216	0.00741279	0.00365015		-0.0244	0.00542	6.86e-06		0.0772	0.00605	3.12e-37		0	0.57025	1
3:191330673:C:T	3	191330673	C	T	0.0381	0.00631	1.56e-09		0.0049	0.0051788	0.350793		0.00396	0.00598	0.508		-0.0188	0.00677	0.00536		0.00305	0.19025	0.8774
3:192899490:C:T	3	192899490	C	T	0.0459	0.00573	1.27e-15		0.0065	0.00467107	0.163814		0.0137	0.00544	0.0115		0.00216	0.00608	0.723		0.00025	0.77035	0.0277
4:10700346:T:G	4	10700346	T	G	0.0652	0.00565	8.28e-31		0.0019	0.00497571	0.699512		0.0124	0.00534	0.0201		-0.00312	0.00603	0.605		0	0.27635	0.0168
4:26102491:C:T	4	26102491	C	T	0.0672	0.00614	7.38e-28		-0.0035	0.00507725	0.491569		0.0322	0.00584	3.67e-08		-0.0082	0.00655	0.211		0	0.99995	0.10815
4:38675390:T:TC	4	38675390	T	TC	-0.0318	0.00562	1.51e-08		-0.0018	0.00467107	0.701683		-0.0207	0.00531	9.63e-05		0.0188	0.006	0.00176		0.0029	0.9796	0.90355
4:40258109:G:A	4	40258109	G	A	-0.0384	0.00574	2.1e-11		-0.001	0.00507725	0.845753		-0.0284	0.00541	1.48e-07		-0.000273	0.00614	0.965		0.00065	0.9983	0.09205
4:40317629:C:T	4	40317629	C	T	-0.0573	0.00617	1.57e-20		-0.0136	0.00507725	0.00677405		-0.00105	0.00585	0.858		0.00731	0.00649	0.26		0.00025	0.0098	0.16035
4:55457212:C:T	4	55457212	C	T	-0.0336	0.00583	8.26e-09		-0.0001	0.00487416	0.990054		-0.00957	0.00549	0.0815		0.00483	0.00626	0.44		0.00225	0.5785	0.28975
4:86953856:GCA:G	4	86953856	GCA	G	0.0518	0.00753	6.08e-12		-0.001	0.00609271	0.870187		-0.0155	0.0073	0.0332		0.0266	0.00789	0.000763		5e-05	0.00165	0.00075
4:102527974:A:G	4	102527974	A	G	-0.139	0.0218	1.69e-10		0.0024	0.0250816	0.924562		-0.0959	0.0215	7.93e-06		0.0372	0.0216	0.0855		0.00035	0.9995	0.66885
4:105282863:A:C	4	105282863	A	C	-0.0335	0.00586	1.08e-08		0.0045	0.00477262	0.345502		-0.00627	0.00556	0.259		-0.0102	0.0062	0.099		0.0008	0.3624	0.0273
4:108177007:C:A	4	108177007	C	A	-0.0349	0.00562	5.6e-10		-0.0031	0.00477262	0.519532		0.000229	0.00531	0.966		0.00261	0.00601	0.664		0.0019	0.08335	0.18835
4:108402225:A:C	4	108402225	A	C	-0.0376	0.0063	2.4e-09		-0.0006	0.00507725	0.898756		-0.0117	0.006	0.0514		0.00563	0.0066	0.394		0.00055	0.66625	0.28645
4:122113805:A:G	4	122113805	A	G	0.0624	0.0106	3.93e-09		0.0292	0.0192936	0.129722		0.0303	0.00985	0.0021		-0.0121	0.0119	0.309		0.1065	0.97305	0.37155
4:122598164:C:T	4	122598164	C	T	-0.0552	0.00713	1.03e-14		0.002	0.00507725	0.690331		-0.048	0.00699	6.32e-12		-0.000256	0.00725	0.972		0	1	0.03575
4:141618041:G:GCTAAACA	4	141618041	G	GCTAAACA	0.0465	0.00845	3.69e-08		0.0085	0.00649889	0.194909		-0.0197	0.00815	0.0158		-0.00383	0.00891	0.667		0.003	0.0038	0.19995
4:148737417:A:AT	4	148737417	A	AT	-0.149	0.0081	1.16e-75		-0.1262	0.00934215	1.17e-41		-0.000119	0.00774	0.988		0.0027	0.00812	0.739		1	0	0
4:150382166:G:A	4	150382166	G	A	-0.0333	0.00585	1.28e-08		-0.0109	0.00477262	0.0231196		-0.00846	0.00556	0.128		0.0203	0.00623	0.00116		0.02665	0.50005	0.92625
4:186086720:A:G	4	186086720	A	G	-0.0725	0.00583	1.59e-35		-0.0111	0.00477262	0.0205651		-0.00291	0.00549	0.597		0.00982	0.0062	0.114		0	0.00085	0.10875
5:692915:A:G	5	692915	A	G	-0.0478	0.00768	4.91e-10		NA	NA	NA		-0.000702	0.00666	0.916		-0.000624	0.00973	0.949		NA	0.05375	0.125
5:10597747:T:C	5	10597747	T	C	-0.0352	0.00575	9.78e-10		0.0049	0.00477262	0.305212		-0.0138	0.00542	0.0111		0.0206	0.00614	0.0008		0.00075	0.8279	0.93925
5:35837132:G:A	5	35837132	G	A	-0.0552	0.00579	1.51e-21		-0.007	0.00487416	0.150403		-0.0298	0.00545	4.62e-08		0.0291	0.00619	2.62e-06		0	0.99965	0.99785
5:57282432:T:G	5	57282432	T	G	-0.0375	0.00627	2.31e-09		-0.0085	0.00507725	0.0941857		0.00459	0.00592	0.438		0.024	0.00668	0.000331		0.00685	0.0296	0.9645
5:72448837:T:G	5	72448837	T	G	0.0335	0.00604	2.87e-08		0.0014	0.00497571	0.786418		0.0191	0.00567	0.000742		-0.00521	0.00649	0.422		0.0035	0.95645	0.30935
5:72697394:A:G	5	72697394	A	G	0.0524	0.00663	2.75e-15		0.0078	0.00558498	0.161784		0.0026	0.00628	0.679		-0.00791	0.00715	0.269		0.0001	0.03955	0.2543
5:77179060:A:G	5	77179060	A	G	-0.0775	0.00975	1.82e-15		-0.0849	0.00913906	2.18e-20		0.0144	0.00886	0.104		0.0126	0.0107	0.24		1	0.00015	0.28985
5:77239986:T:G	5	77239986	T	G	0.115	0.00567	9.8e-91		0.1631	0.00467107	4.97e-268		4.99e-05	0.00539	0.993		0.00396	0.00607	0.514		1	0	0
5:103260191:C:G	5	103260191	C	G	-0.0629	0.00601	1.23e-25		-0.0041	0.00497571	0.412484		-0.0243	0.00569	2.01e-05		0.0173	0.0064	0.00697		0	0.99515	0.82465
5:111230662:C:T	5	111230662	C	T	0.0815	0.0116	2.29e-12		0.0024	0.0112715	0.831168		0.0268	0.0113	0.0171		-0.0307	0.0124	0.013		0	0.86775	0.89055
5:112116632:C:A	5	112116632	C	A	0.0409	0.00564	4.15e-13		0.0075	0.00456953	0.103731		-0.000321	0.00533	0.952		-0.000146	0.00603	0.981		0.0018	0.04175	0.0795
5:126732070:T:C	5	126732070	T	C	-0.0329	0.00572	8.63e-09		-0.0028	0.00487416	0.565887		-3.53e-05	0.00542	0.995		0.01	0.00609	0.101		0.0039	0.1078	0.5509
5:134088103:T:C	5	134088103	T	C	-0.0812	0.00691	6.73e-32		-0.0007	0.00660043	0.919243		-0.0104	0.00638	0.102		0.011	0.0078	0.159		0	0.02475	0.1205
5:139474618:A:C	5	139474618	A	C	0.0453	0.00621	3.11e-13		0.0031	0.00538189	0.561828		-0.00392	0.00583	0.501		-0.0287	0.00667	1.72e-05		0.00015	0.012	0.99305
5:143413085:A:G	5	143413085	A	G	-0.0441	0.00576	2.03e-14		-0.0028	0.00487416	0.568559		-0.00637	0.00547	0.244		-0.00315	0.00612	0.606		0.00025	0.19975	0.0271
5:157186630:T:C	5	157186630	T	C	0.059	0.00867	1.02e-11		0.0116	0.00660043	0.081273		0.0172	0.00839	0.0402		-0.023	0.00908	0.0112		0.0006	0.7175	0.8779
6:368019:T:A	6	368019	T	A	-0.376	0.0575	6.42e-11		NA	NA	NA		-0.156	0.047	0.000904		0.123	0.0693	0.0763		NA	0.98585	0.68125
6:408079:C:T	6	408079	C	T	0.0586	0.00559	9.49e-26		0.0095	0.00467107	0.0390999		0.0188	0.00527	0.000359		0.0683	0.00598	3.78e-30		0	0.9524	0
6:7109200:C:T	6	7109200	C	T	-0.0333	0.00562	3.17e-09		-0.0044	0.00477262	0.348996		-0.00784	0.0053	0.139		-0.00611	0.00602	0.309		0.00585	0.467	0.04575
6:21881714:G:GCGC	6	21881714	G	GCGC	0.0752	0.007	6.43e-27		0.0067	0.00629579	0.28618		0.0467	0.00648	5.77e-13		-0.026	0.00781	0.000885		0	1	0.9723
6:22114901:A:C	6	22114901	A	C	0.0418	0.00572	2.64e-13		0.0006	0.00487416	0.908212		4.98e-05	0.00538	0.993		-0.033	0.00617	9.1e-08		0.0005	0.03955	0.9991
6:43838872:G:A	6	43838872	G	A	0.0902	0.00606	3.67e-50		0.0992	0.00507725	1.53e-86		-0.00159	0.00567	0.779		-0.00324	0.00644	0.615		1	5e-05	0.0009
6:43938518:C:T	6	43938518	C	T	-0.0598	0.00681	1.62e-18		-0.0813	0.00538189	1.71e-52		0.015	0.00643	0.0196		-0.00254	0.00712	0.722		1	0.00015	0.01135
6:90279406:G:C	6	90279406	G	C	0.0953	0.00562	1.36e-64		0.0138	0.00456953	0.00271185		0.0226	0.0053	1.96e-05		-0.0404	0.00601	1.78e-11		0	0.8821	1
6:107114666:TCCGGCCGCC:T	6	107114666	TCCGGCCGCC	T	0.0421	0.00573	1.91e-13		0.0041	0.0051788	0.433074		0.0101	0.00541	0.061		0.0203	0.00614	0.000956		0.0005	0.51095	0.00135
6:107724925:T:G	6	107724925	T	G	0.0451	0.00667	1.37e-11		0.0098	0.00619425	0.115721		0.0299	0.00616	1.19e-06		-0.0322	0.00743	1.43e-05		0.00335	0.999	0.99445
6:108941239:G:C	6	108941239	G	C	-0.034	0.00571	2.55e-09		-0.0139	0.00477262	0.003253		0.00678	0.00537	0.206		-0.00255	0.00614	0.678		0.0645	0.02165	0.08415
6:108989516:T:G	6	108989516	T	G	-0.0595	0.00747	1.66e-15		-0.0046	0.00690507	0.502678		0.0243	0.00708	0.000612		0.00588	0.00817	0.471		0	5e-05	0.14065
6:111777061:A:G	6	111777061	A	G	-0.0353	0.00561	3.3e-10		-0.0032	0.00456953	0.481349		-0.0161	0.00529	0.00235		-0.00648	0.00598	0.278		0.00215	0.91555	0.03315
6:132827664:A:G	6	132827664	A	G	-0.0556	0.00986	1.66e-08		0.001	0.0092406	0.916584		-0.00155	0.00906	0.864		0.0297	0.0108	0.00583		0.00045	0.08515	0.9134
6:135150478:T:C	6	135150478	T	C	0.049	0.00672	3.13e-13		0.0107	0.00538189	0.047904		-0.00438	0.00639	0.493		-0.0132	0.00718	0.066		0.0014	0.0082	0.60135
6:135815734:C:T	6	135815734	C	T	0.0483	0.00641	4.88e-14		0.0036	0.00497571	0.470926		0.0149	0.00619	0.0159		-0.0144	0.00668	0.0308		0.0001	0.78285	0.71235
6:137678425:GA:G	6	137678425	GA	G	0.0451	0.00673	2.14e-11		0.0138	0.00873288	0.11439		0.0421	0.00639	4.48e-11		0.0221	0.00715	0.002		0.01785	1	0.00195
6:137829402:C:T	6	137829402	C	T	-0.0506	0.00699	4.68e-13		-0.0015	0.00558498	0.786911		-0.0262	0.00662	7.3e-05		0.00228	0.00739	0.758		0	0.9928	0.09885
6:142917587:T:A	6	142917587	T	A	-0.0519	0.00751	4.66e-12		-0.0194	0.00690507	0.00485926		-0.0162	0.00694	0.0195		0.00322	0.00818	0.693		0.02545	0.78975	0.12805
6:148200156:C:T	6	148200156	C	T	0.0761	0.00582	4.15e-39		0.0402	0.00467107	9.73e-18		0.0015	0.00555	0.787		0.0085	0.00618	0.169		0.986	0.0003	0
6:148316764:G:T	6	148316764	G	T	0.292	0.043	1.18e-11		0.0677	0.0402119	0.0926012		-0.0204	0.0444	0.646		0.00979	0.0437	0.823		0.0199	0.0601	0.09765
6:159047533:G:A	6	159047533	G	A	0.0434	0.00565	1.63e-14		0.0094	0.00467107	0.0412029		0.0039	0.00533	0.464		-0.0162	0.00602	0.00713		0.0016	0.10445	0.85205
6:165625087:T:C	6	165625087	T	C	-0.0506	0.00786	1.2e-10		-0.0986	0.00660043	1.12e-49		-0.00684	0.00736	0.353		0.0159	0.00837	0.0573		1	0.20395	0.6734
6:165633546:A:G	6	165633546	A	G	-0.0813	0.00628	2.87e-38		-0.1154	0.00497571	3.05e-120		0.00862	0.00592	0.145		-0.00397	0.0066	0.547		1	0	0.0003
6:166929653:G:A	6	166929653	G	A	0.0928	0.0115	6.25e-16		0.0094	0.0092406	0.309616		-0.0068	0.0112	0.542		-0.0514	0.0122	2.52e-05		0	0.0018	0.99825
6:166986024:A:G	6	166986024	A	G	-0.0847	0.00584	1.27e-47		-0.0103	0.00487416	0.0331419		-0.0267	0.00549	1.18e-06		0.0562	0.00622	1.57e-19		0	0.9975	1
6:168486653:C:T	6	168486653	C	T	0.0355	0.00621	1.1e-08		0.0297	0.00558498	1.15e-07		-0.00633	0.0058	0.275		-0.00855	0.00681	0.209		0.97695	0.02745	0.4418
7:2894752:A:G	7	2894752	A	G	0.0532	0.00653	4.04e-16		0.0157	0.00568652	0.00533995		0.0272	0.00624	1.27e-05		-0.00405	0.00692	0.559		0.0024	0.9976	0.10275
7:4745498:T:G	7	4745498	T	G	-0.0452	0.00606	8.26e-14		-0.0052	0.00507725	0.304111		-0.0152	0.00581	0.00885		0.0125	0.00636	0.0497		0.0001	0.84475	0.6265
7:5753939:G:C	7	5753939	G	C	-0.0578	0.00903	1.58e-10		-0.0154	0.00873288	0.0792177		0.0462	0.00813	1.34e-08		0.00914	0.01	0.362		0.00535	0	0.30025
7:6395481:A:G	7	6395481	A	G	0.0328	0.00567	7.36e-09		0.0031	0.00467107	0.506049		-0.0159	0.00539	0.00322		0.0181	0.00604	0.00275		0.00465	0.0059	0.0087
7:20418351:C:A	7	20418351	C	A	-0.041	0.00583	1.93e-12		0.001	0.00477262	0.833238		-0.0209	0.0055	0.000148		-0.0132	0.00624	0.0342		0.00015	0.98175	0.0053
7:26110866:GCT:G	7	26110866	GCT	G	-0.0462	0.00703	4.7e-11		-0.0031	0.00548343	0.566382		-0.0052	0.00665	0.434		0.0146	0.00744	0.0492		0.00025	0.1657	0.6773
7:26723364:C:G	7	26723364	C	G	0.0466	0.00623	7.27e-14		0.0044	0.00487416	0.371046		0.0124	0.00594	0.0362		0.00327	0.00651	0.616		0.0002	0.63795	0.02875
7:37342861:T:G	7	37342861	T	G	0.0611	0.00927	4.17e-11		0.0113	0.00771743	0.140836		0.0646	0.00869	1.07e-13		-0.000654	0.00992	0.947		0.0005	1	0.08
7:37383868:T:A	7	37383868	T	A	-0.0343	0.00571	1.85e-09		-0.0029	0.00538189	0.592406		-0.0167	0.00538	0.00193		0.0021	0.00612	0.732		0.0034	0.926	0.17815
7:44977336:G:A	7	44977336	G	A	0.0354	0.00615	8.71e-09		0.0165	0.00558498	0.00333974		0.0135	0.00575	0.0188		0.0153	0.00674	0.0229		0.12465	0.78755	0.01415
7:46694687:G:C	7	46694687	G	C	0.039	0.00702	2.81e-08		0.0255	0.0051788	9.71e-07		0.0013	0.00677	0.848		0.00594	0.00723	0.412		0.83625	0.1303	0.0505
7:74606017:G:A	7	74606017	G	A	0.105	0.0188	2.12e-08		0.0339	0.0256909	0.186818		0.114	0.0167	1.15e-11		-0.0162	0.0221	0.464		0.0398	1	0.32575
7:77538960:A:G	7	77538960	A	G	0.0422	0.0061	4.6e-12		0.0103	0.00497571	0.0401623		-0.00155	0.00579	0.79		-0.012	0.00651	0.0649		0.00415	0.0325	0.6047
7:80372340:A:G	7	80372340	A	G	0.0539	0.00974	3.11e-08		0.0302	0.00741279	5.1e-05		-0.00156	0.00952	0.87		0.0131	0.0102	0.201		0.57175	0.0642	0.02035
7:92595474:A:G	7	92595474	A	G	0.299	0.0506	3.48e-09		-0.0036	0.0466092	0.937957		0.0289	0.0528	0.584		-0.00276	0.0482	0.954		0.0024	0.35775	0.1898
7:100804203:T:G	7	100804203	T	G	-0.035	0.00581	1.79e-09		-0.005	0.00477262	0.2961		-0.0037	0.00549	0.5		0.0186	0.00618	0.00267		0.0039	0.20335	0.89535
7:127375029:G:A	7	127375029	G	A	0.0882	0.0151	5.53e-09		0.0791	0.0163488	1.32e-06		0.0292	0.014	0.0375		0.0294	0.0176	0.0946		0.99725	0.8126	0.01025
7:128939988:A:G	7	128939988	A	G	0.0523	0.00563	1.63e-20		0.0058	0.00467107	0.219742		0.0533	0.00533	1.72e-23		-0.0146	0.00602	0.0155		5e-05	1	0.74595
7:129057976:T:TTG	7	129057976	T	TTG	0.0379	0.00683	2.81e-08		NA	NA	NA		0.0504	0.0063	1.29e-15		-0.000316	0.00757	0.967		NA	0.99995	0.14575
7:139098477:C:G	7	139098477	C	G	0.0393	0.00658	2.23e-09		0.0068	0.00558498	0.224983		0.0233	0.00619	0.000165		0.00798	0.00707	0.259		0.00395	0.98395	0.03105
7:139704867:A:C	7	139704867	A	C	-0.0471	0.00694	1.17e-11		-0.0064	0.00588961	0.278058		-0.0205	0.00652	0.00166		0.00899	0.00743	0.226		0.00095	0.95435	0.3641
8:8462453:G:C	8	8462453	G	C	-0.0753	0.00562	7.17e-41		-0.034	0.00538189	2.67e-10		-8.99e-05	0.00531	0.986		0.00154	0.00599	0.797		0.1278	5e-05	0.0015
8:9459499:C:T	8	9459499	C	T	-0.108	0.0168	1.55e-10		-0.0177	0.0121854	0.147148		0.0138	0.0155	0.374		0.0203	0.0177	0.251		0.0002	0.005	0.3935
8:11582510:G:A	8	11582510	G	A	0.0494	0.00566	2.38e-18		0.015	0.00558498	0.00749165		-0.00281	0.00536	0.6		-0.00822	0.00602	0.172		0.00375	0.00505	0.2954
8:23512505:C:T	8	23512505	C	T	-0.0469	0.00729	1.19e-10		-0.0275	0.00558498	7.46e-07		-0.00168	0.00701	0.811		0.00292	0.0075	0.697		0.7601	0.07885	0.1354
8:30325413:A:G	8	30325413	A	G	-0.0386	0.00698	3.2e-08		-0.0008	0.00548343	0.877478		-0.0127	0.00659	0.0543		-9.64e-05	0.00738	0.99		0.0021	0.6818	0.1298
8:32446867:T:G	8	32446867	T	G	0.0307	0.00563	4.81e-08		0.0188	0.00456953	4.22e-05		0.00366	0.00533	0.493		-0.0101	0.00601	0.0943		0.4855	0.2577	0.5636
8:32549031:G:A	8	32549031	G	A	-0.0541	0.00663	3.64e-16		-0.0627	0.00568652	2.34e-28		0.0032	0.00618	0.605		0.00394	0.00715	0.581		1	0.00475	0.09565
8:60473974:T:C	8	60473974	T	C	0.05	0.00572	2.3e-18		0.0025	0.00477262	0.592604		0.0178	0.00541	0.00101		-0.000906	0.00614	0.883		5e-05	0.94405	0.0425
8:60842154:C:T	8	60842154	C	T	-0.068	0.0121	1.87e-08		0.0168	0.0221368	0.448977		-0.00988	0.0106	0.352		0.0111	0.014	0.43		0.00235	0.24195	0.3211
8:100317981:A:C	8	100317981	A	C	0.0338	0.00564	2.09e-09		0	0.00456953	0.994091		0.0139	0.00535	0.00944		-0.0219	0.00602	0.000275		0.00185	0.8387	0.9573
8:100409029:GC:G	8	100409029	GC	G	-0.0826	0.0146	1.73e-08		-0.0277	0.021426	0.195515		-0.00298	0.0137	0.828		-0.0287	0.0156	0.0648		0.0408	0.0831	0.0078
8:118939661:A:C	8	118939661	A	C	-0.0467	0.00574	4.4e-16		-0.0108	0.00477262	0.0222441		-0.0158	0.00541	0.0034		0.0114	0.00616	0.0633		0.0012	0.88205	0.546
8:119850527:T:TA	8	119850527	T	TA	0.0348	0.00625	2.64e-08		NA	NA	NA		-0.00182	0.00584	0.756		0.0021	0.00685	0.759		NA	0.0713	0.10505
8:127181049:G:A	8	127181049	G	A	-0.0711	0.00598	1.17e-32		-0.0069	0.00477262	0.147453		-0.00201	0.00565	0.722		0.00115	0.00631	0.855		0	0.001	0.00375
8:127990983:C:A	8	127990983	C	A	0.0432	0.00618	2.69e-12		0.0088	0.00548343	0.106295		0.0116	0.00581	0.0458		-0.0247	0.0067	0.000229		0.0026	0.62145	0.9739
8:128144770:A:G	8	128144770	A	G	-0.0462	0.00575	9.41e-16		-0.0115	0.00456953	0.0120514		-0.00855	0.00545	0.117		-0.0078	0.00611	0.202		0.0018	0.3215	0.0071
8:128589526:G:A	8	128589526	G	A	0.0555	0.00759	2.74e-13		0.0147	0.0072097	0.0415076		0.023	0.00711	0.00123		0.00238	0.00834	0.775		0.00235	0.96815	0.03605
8:132887335:C:T	8	132887335	C	T	0.829	0.0872	2.01e-21		NA	NA	NA		0.0147	0.0942	0.876		-0.14	0.135	0.3		NA	0.29965	0.4806
8:132905343:G:A	8	132905343	G	A	-0.0648	0.00582	9.93e-29		-0.0287	0.00477262	2.27e-09		0.00894	0.00555	0.107		-0.00595	0.0062	0.337		0.1214	0.0001	0.00095
8:139988205:C:T	8	139988205	C	T	-0.101	0.0183	3.66e-08		-0.0099	0.0267064	0.709283		-0.00827	0.0159	0.603		-0.0304	0.0214	0.155		0.0088	0.1324	0.02225
8:140587112:A:G	8	140587112	A	G	-0.0682	0.00681	1.39e-23		-0.0124	0.00599116	0.0392156		-0.0147	0.00643	0.0223		-0.00744	0.00743	0.316		0	0.47155	0.00135
8:141190368:G:A	8	141190368	G	A	-0.0384	0.00631	1.16e-09		-0.0094	0.0051788	0.072215		-0.00163	0.00594	0.785		-0.0097	0.00673	0.15		0.0082	0.11395	0.02135
9:3857583:G:A	9	3857583	G	A	0.545	0.0879	5.68e-10		NA	NA	NA		0.158	0.0881	0.0736		-0.355	0.134	0.00778		NA	0.7066	0.6531
9:4221298:A:C	9	4221298	A	C	-0.052	0.0061	1.64e-17		-0.0504	0.0051788	1.14e-22		0.00087	0.00577	0.88		0.00531	0.00663	0.424		1	0.00885	0.13515
9:4290544:T:C	9	4290544	T	C	-0.0564	0.00561	1.03e-23		-0.0517	0.00456953	1.33e-29		-0.00365	0.00532	0.492		-0.00796	0.00602	0.186		1	0.0176	0.0014
9:5438435:C:A	9	5438435	C	A	0.0478	0.00693	5.14e-12		0.0046	0.00619425	0.460003		0.00764	0.00653	0.242		0.00669	0.0075	0.372		0.00045	0.25435	0.02195
9:5525775:A:G	9	5525775	A	G	-0.0338	0.00591	1.13e-08		-0.003	0.00568652	0.597055		-0.00404	0.00558	0.469		0.0127	0.00631	0.0447		0.006	0.23555	0.6732
9:21576592:A:C	9	21576592	A	C	-0.0611	0.00604	4.37e-24		-0.0079	0.00477262	0.0988018		1.54e-06	0.00578	1		0.0113	0.00642	0.0778		0	0.00245	0.3614
9:21632813:A:G	9	21632813	A	G	0.101	0.0123	2.46e-16		0.0072	0.00852979	0.398249		0.0315	0.0123	0.0104		0.00775	0.0125	0.536		0	0.90295	0.0038
9:95781499:GCA:G	9	95781499	GCA	G	-0.122	0.0179	7.91e-12		NA	NA	NA		-0.00408	0.0149	0.785		-0.00852	0.0221	0.699		NA	0.0218	0.05085
9:96322658:G:A	9	96322658	G	A	0.046	0.00775	2.83e-09		0.0005	0.00690507	0.946328		0.00254	0.00726	0.726		0.00356	0.00853	0.677		0.00045	0.1106	0.06535
9:97796811:C:T	9	97796811	C	T	0.239	0.00598	4.94e-324		0.0308	0.00781897	8.83e-05		-0.0269	0.00555	1.21e-06		-0.0104	0.0063	0.098		0	0	0
9:99067260:G:A	9	99067260	G	A	0.0459	0.00713	1.22e-10		-0.0072	0.00548343	0.192786		-0.00391	0.00689	0.57		-0.0157	0.0075	0.0366		0.0001	0.02385	0.7318
9:99427621:C:T	9	99427621	C	T	-0.0386	0.00701	3.67e-08		-0.004	0.00528034	0.448579		-0.00308	0.00668	0.645		0.00356	0.00731	0.626		0.00265	0.17705	0.2186
9:107841065:G:C	9	107841065	G	C	0.0619	0.00872	1.27e-12		0.0069	0.00964678	0.471621		-0.00491	0.00799	0.539		-0.0181	0.0101	0.0734		0.0004	0.006	0.6479
9:107875268:C:T	9	107875268	C	T	-0.0532	0.00826	1.25e-10		-0.0078	0.00731125	0.283373		8.82e-05	0.00798	0.991		0.0126	0.00845	0.138		0.00045	0.04925	0.49185
9:114760300:C:A	9	114760300	C	A	0.0354	0.00575	7.01e-10		-0.0002	0.00487416	0.969964		0.0115	0.00544	0.0338		-0.00929	0.00618	0.133		0.0012	0.69175	0.50005
9:124267351:A:G	9	124267351	A	G	0.0809	0.0057	9.95e-46		0.0322	0.00467107	4.42e-12		0.016	0.00541	0.00306		-0.0141	0.00611	0.0208		0.0052	0.29585	0.2808
9:125354538:A:G	9	125354538	A	G	-0.0345	0.00558	6.3e-10		-0.0039	0.00456953	0.39317		0.00055	0.00528	0.917		0.0112	0.00596	0.0611		0.0027	0.07935	0.61065
9:128897445:T:C	9	128897445	T	C	-0.0633	0.00902	2.19e-12		-0.0104	0.00802206	0.192988		-0.0103	0.00853	0.226		0.0131	0.00946	0.166		0.0004	0.25215	0.4214
10:3889686:C:T	10	3889686	C	T	0.0353	0.00647	4.73e-08		-0.001	0.00548343	0.856788		0.00603	0.00613	0.325		0.0175	0.00696	0.0119		0.0023	0.3325	0.01115
10:6056861:T:C	10	6056861	T	C	-0.0745	0.00572	8.94e-39		-0.0054	0.00456953	0.245921		-0.0427	0.00544	3.99e-15		0.0348	0.00605	8.63e-09		0	1	1
10:6348230:G:C	10	6348230	G	C	0.0679	0.007	2.94e-22		0.0111	0.00548343	0.0421904		0.0331	0.00664	6.25e-07		-0.0252	0.00735	0.000619		0	0.99975	0.97685
10:6471591:G:GA	10	6471591	G	GA	0.06	0.00632	2.22e-21		NA	NA	NA		0.0243	0.00593	4.19e-05		-0.0296	0.00691	1.84e-05		NA	0.99365	0.99575
10:8563235:G:A	10	8563235	G	A	0.0669	0.00761	1.55e-18		0.0441	0.00660043	2.36e-11		0.0109	0.00728	0.134		-0.0154	0.00819	0.0594		0.99845	0.1902	0.5671
10:14476200:C:T	10	14476200	C	T	-0.033	0.00589	2.06e-08		0.0004	0.00477262	0.932343		-0.0066	0.00559	0.238		0.0107	0.00624	0.0854		0.00275	0.38025	0.57915
10:32276910:T:C	10	32276910	T	C	0.0517	0.00944	4.29e-08		0.0104	0.00700661	0.137678		0.00217	0.00921	0.814		0.00797	0.00981	0.417		0.0028	0.1217	0.0379
10:62020112:C:T	10	62020112	C	T	0.104	0.00715	4.95e-48		0.01	0.00588961	0.090357		0.0315	0.00681	3.9e-06		-0.0134	0.00765	0.0794		0	0.99765	0.041
10:62297443:A:G	10	62297443	A	G	-0.0668	0.00573	2.08e-31		-0.0096	0.00467107	0.0396364		-0.00658	0.00545	0.227		0.017	0.00609	0.00534		0	0.0156	0.80595
10:71376162:G:A	10	71376162	G	A	0.0521	0.00878	2.92e-09		0.0131	0.00761588	0.0874004		0.0142	0.00812	0.0803		-0.00883	0.00953	0.354		0.00585	0.612	0.3198
10:79307723:C:G	10	79307723	C	G	0.0332	0.00569	5.19e-09		0.0028	0.00497571	0.5743		-0.00918	0.00537	0.0874		-0.0271	0.00611	9.2e-06		0.0035	0.0152	0.98725
10:88089762:A:G	10	88089762	A	G	-0.0412	0.00574	7.32e-13		-0.035	0.00477262	1.37e-13		0.00158	0.0054	0.77		0.00199	0.00613	0.746		0.9998	0.02675	0.1139
10:88230764:G:A	10	88230764	G	A	-0.0383	0.00617	5.68e-10		-0.0182	0.00497571	0.000271651		-0.00507	0.00589	0.389		-0.00575	0.00656	0.381		0.162	0.22925	0.0379
10:88998030:A:C	10	88998030	A	C	-0.031	0.00564	3.89e-08		-0.002	0.00456953	0.671768		-0.00737	0.00532	0.166		0.00313	0.00603	0.603		0.00485	0.45605	0.23935
10:99523573:C:A	10	99523573	C	A	-0.0757	0.00579	4.79e-39		-0.0584	0.00477262	6.2e-35		-0.0213	0.00552	0.000118		-0.00401	0.00616	0.515		1	0.95685	0.0003
10:101130337:T:G	10	101130337	T	G	-0.0319	0.00577	3.29e-08		-0.0072	0.00497571	0.151929		-0.00102	0.0054	0.85		-0.00172	0.00624	0.783		0.01305	0.14485	0.11975
10:101733469:T:C	10	101733469	T	C	0.0348	0.00563	6.11e-10		0.0032	0.00467107	0.495437		0.0129	0.00532	0.0155		0.00672	0.00603	0.265		0.002	0.79265	0.03675
10:113588287:G:A	10	113588287	G	A	0.0959	0.0158	1.27e-09		0.0269	0.012287	0.0287477		0.0367	0.0156	0.0184		-0.0155	0.0162	0.338		0.0038	0.9005	0.31525
10:122389836:C:T	10	122389836	C	T	-0.0494	0.00601	1.95e-16		-0.011	0.00467107	0.0179697		-0.0116	0.00573	0.0434		-0.0019	0.00629	0.762		0.00055	0.5244	0.02515
10:132537901:CAGCG:C	10	132537901	CAGCG	C	0.0752	0.0119	3.05e-10		NA	NA	NA		0.00302	0.0114	0.792		-0.0205	0.0128	0.11		NA	0.0647	0.59545
11:308290:T:C	11	308290	T	C	-0.0354	0.00566	4.05e-10		-0.0074	0.00680352	0.276854		-0.0103	0.00533	0.0531		0.000121	0.00607	0.984		0.01075	0.62095	0.1153
11:640349:G:A	11	640349	G	A	-0.052	0.00663	4.69e-15		-0.0115	0.00802206	0.15386		-0.0181	0.00629	0.00395		0.0223	0.00698	0.00143		0.0021	0.90885	0.9546
11:9770097:C:T	11	9770097	C	T	0.0393	0.00637	6.49e-10		0.0118	0.00477262	0.0131147		0.0289	0.00613	2.53e-06		-0.00533	0.00659	0.418		0.0132	0.99885	0.2588
11:10509469:T:C	11	10509469	T	C	0.132	0.0177	1.04e-13		0.0152	0.0165518	0.359575		-0.00646	0.0164	0.694		0.00891	0.0211	0.673		5e-05	0.00425	0.02815
11:35243666:T:TCAAA	11	35243666	T	TCAAA	0.0685	0.00579	2.82e-32		0.0087	0.00456953	0.0595503		0.0117	0.0055	0.0329		-0.0172	0.00617	0.00527		0	0.14645	0.80525
11:47408641:T:TCGC	11	47408641	T	TCGC	0.0388	0.00597	7.71e-11		0.007	0.00487416	0.150403		-0.00112	0.00565	0.843		0.0163	0.00638	0.0108		0.0029	0.05445	0.0058
11:57430308:G:A	11	57430308	G	A	-0.0382	0.00656	5.74e-09		-0.0217	0.00568652	0.000115297		-0.00958	0.00615	0.119		0.00737	0.00707	0.297		0.41935	0.50935	0.36575
11:61128363:A:G	11	61128363	A	G	-0.0326	0.00569	9.58e-09		0.0051	0.00456953	0.261598		-0.0193	0.0054	0.000339		0.0188	0.00603	0.00182		0.00135	0.9659	0.90425
11:64340005:T:C	11	64340005	T	C	-0.043	0.00581	1.24e-13		0.0064	0.00487416	0.186312		-0.0421	0.00548	1.55e-14		0.0533	0.0062	7.95e-18		5e-05	1	1
11:72814897:G:T	11	72814897	G	T	-0.0375	0.00587	1.77e-10		-0.0015	0.00477262	0.74934		0.00368	0.00556	0.508		-0.00126	0.00622	0.84		0.0011	0.02905	0.08025
11:86354173:C:T	11	86354173	C	T	0.0606	0.01	1.35e-09		0.0099	0.00781897	0.207839		-0.00138	0.00982	0.889		0.00418	0.0104	0.688		0.00095	0.0451	0.04875
11:86360905:A:G	11	86360905	A	G	-0.0398	0.0059	1.45e-11		-0.0169	0.00477262	0.000435428		-0.00878	0.00555	0.114		-0.0031	0.0063	0.622		0.07585	0.43955	0.04915
11:94179472:A:G	11	94179472	A	G	-0.0779	0.0103	3.41e-14		-0.0186	0.00812361	0.0221158		0.0159	0.00953	0.0961		0.0118	0.011	0.286		0.0003	0.00025	0.2545
11:95550310:C:T	11	95550310	C	T	-0.0359	0.00568	2.66e-10		-0.0091	0.00467107	0.05078		-0.0155	0.00536	0.00378		0.0112	0.00607	0.0655		0.00905	0.8941	0.61125
11:95578258:T:C	11	95578258	T	C	0.105	0.00743	1.2e-45		0.0128	0.00599116	0.0342089		0.0443	0.00708	3.99e-10		-0.0385	0.008	1.47e-06		0	1	0.9998
11:111776191:T:A	11	111776191	T	A	0.0349	0.00601	6.07e-09		0.0222	0.00497571	6.84e-06		0.0111	0.00568	0.0518		-0.00231	0.00639	0.718		0.6687	0.664	0.1873
11:115182291:A:G	11	115182291	A	G	0.0501	0.00562	4.88e-19		0.0377	0.00456953	1.3e-16		0.00228	0.00531	0.668		-0.000823	0.00599	0.891		0.9999	0.02885	0.0402
11:116863829:G:A	11	116863829	G	A	0.0392	0.00609	1.29e-10		-0.0025	0.00497571	0.616436		-0.00361	0.00581	0.534		-0.0252	0.00647	9.83e-05		0.0004	0.02685	0.9798
11:117212250:G:A	11	117212250	G	A	-0.0956	0.00972	7.6e-23		-0.012	0.00852979	0.159855		-0.0183	0.00899	0.0418		0.00437	0.0104	0.675		0	0.29075	0.01845
11:118392339:G:A	11	118392339	G	A	0.0485	0.00703	5.03e-12		0.0076	0.00599116	0.208242		0.0469	0.0066	1.22e-12		-0.00516	0.00762	0.498		0.00075	1	0.19525
11:118709639:C:T	11	118709639	C	T	-0.0418	0.00569	2.12e-13		-0.014	0.00467107	0.00250999		-0.00556	0.00537	0.301		0.0121	0.00607	0.0455		0.0161	0.193	0.63115
11:128286419:A:G	11	128286419	A	G	0.0379	0.00575	4.31e-11		0.0012	0.00477262	0.796967		0.00196	0.00542	0.718		-0.00629	0.00614	0.306		0.0005	0.1066	0.30415
12:519821:G:C	12	519821	G	C	0.104	0.0185	1.63e-08		0.1737	0.0663089	0.00882704		0.00096	0.0164	0.953		0.0218	0.024	0.365		0.5961	0.06005	0.05415
12:642348:A:G	12	642348	A	G	0.0471	0.00598	3.04e-15		0.0171	0.00497571	0.000582949		0.0034	0.00568	0.549		0.00169	0.00637	0.791		0.017	0.069	0.0344
12:6773332:C:A	12	6773332	C	A	0.63	0.104	1.67e-09		NA	NA	NA		0.251	0.104	0.0161		0.0251	0.15	0.867		NA	0.7562	0.32585
12:9770056:A:C	12	9770056	A	C	0.1	0.0063	4.8e-57		0.0031	0.00507725	0.542222		0.0126	0.00602	0.0368		-0.0123	0.00673	0.0672		0	0.0026	0.0216
12:11899768:G:A	12	11899768	G	A	0.0358	0.00565	2.23e-10		0.0016	0.00456953	0.728821		0.00969	0.00533	0.0692		0.00432	0.00604	0.474		0.00175	0.5672	0.04925
12:12419614:T:C	12	12419614	T	C	0.0372	0.00573	8.74e-11		0.0145	0.00467107	0.00188201		0.00678	0.00542	0.211		-0.0104	0.00612	0.0879		0.0498	0.3341	0.5521
12:42004617:C:T	12	42004617	C	T	-0.0314	0.00563	2.37e-08		-0.0014	0.00456953	0.757526		-0.00234	0.00533	0.66		0.000297	0.00601	0.961		0.00345	0.1851	0.15115
12:46093639:A:G	12	46093639	A	G	-0.0528	0.00838	3.11e-10		-0.0053	0.00741279	0.477676		-0.00538	0.0078	0.49		0.00418	0.00901	0.643		0.00085	0.1475	0.1691
12:47763920:C:T	12	47763920	C	T	0.0903	0.01	2.03e-19		0.0434	0.00852979	4.17e-07		-0.00467	0.00954	0.625		-0.0234	0.011	0.0332		0.3841	0.0006	0.72795
12:56041720:G:C	12	56041720	G	C	0.0758	0.00596	4.41e-37		0.0046	0.00700661	0.512197		0.0318	0.00567	1.92e-08		-0.0372	0.00637	5.45e-09		0	1	1
12:56182198:T:G	12	56182198	T	G	0.31	0.0452	6.88e-12		NA	NA	NA		0.14	0.0406	0.00059		-0.117	0.0593	0.0482		NA	0.99185	0.7466
12:56627222:T:C	12	56627222	T	C	0.0446	0.00594	5.73e-14		-0.0065	0.00477262	0.169901		0.00491	0.00567	0.386		-0.0212	0.00631	0.000808		0	0.1395	0.9535
12:57570834:G:A	12	57570834	G	A	-0.0393	0.00567	4.4e-12		-0.0057	0.00467107	0.224278		-0.0224	0.00534	2.72e-05		0.000201	0.00609	0.974		0.0014	0.99085	0.09145
12:68040679:T:C	12	68040679	T	C	-0.093	0.0165	1.81e-08		-0.0046	0.0127947	0.717967		-0.0288	0.016	0.0712		0.00831	0.0167	0.619		0.00015	0.72915	0.1934
12:96200749:G:A	12	96200749	G	A	0.135	0.0227	2.8e-09		0.1777	0.0163488	2.02e-27		0.0239	0.0242	0.323		0.0229	0.0219	0.296		1	0.385	0.01535
12:103313022:T:A	12	103313022	T	A	-0.0378	0.00563	1.92e-11		-0.0015	0.00477262	0.752792		-0.014	0.00532	0.00843		0.00624	0.00603	0.301		0.0008	0.8329	0.30715
12:103499163:G:T	12	103499163	G	T	-0.0582	0.00608	1.03e-21		-0.0022	0.00507725	0.666337		-0.0158	0.00573	0.00588		0.00445	0.00657	0.498		0	0.78505	0.0687
12:111446804:T:C	12	111446804	T	C	-0.184	0.00564	9.07e-234		-0.0298	0.00456953	7.37e-11		-0.0839	0.00536	3.22e-55		0.00149	0.00601	0.804		0	1	0
12:112651836:A:C	12	112651836	A	C	0.0396	0.00576	6.5e-12		0.0107	0.00467107	0.0210788		0.0132	0.00545	0.0157		-0.00177	0.00615	0.774		0.0075	0.7788	0.12415
12:114636008:A:C	12	114636008	A	C	0.038	0.00562	1.43e-11		0.0156	0.00497571	0.00172385		0.00189	0.00532	0.722		-0.00419	0.006	0.485		0.0623	0.10035	0.21305
13:24212218:T:C	13	24212218	T	C	0.0887	0.00607	2.28e-48		0.0407	0.0051788	5.05e-15		-0.00229	0.00575	0.691		0.0166	0.00653	0.0108		0.34655	0	0
13:28029870:T:C	13	28029870	T	C	0.362	0.0252	5.55e-47		0.0836	0.0283311	0.00322483		0.12	0.0243	8.52e-07		-0.106	0.0278	0.000135		0	1	0.9981
13:28138552:C:G	13	28138552	C	G	0.136	0.0197	4.89e-12		-0.0217	0.0274172	0.428798		0.0157	0.0202	0.438		-0.0241	0.0195	0.216		0.0001	0.1649	0.374
13:31889992:AACAAT:A	13	31889992	AACAAT	A	0.0329	0.00579	1.37e-08		0.0129	0.00781897	0.0963762		-0.0137	0.00547	0.0121		-0.00522	0.00616	0.397		0.06345	0.00805	0.3103
13:40569053:G:A	13	40569053	G	A	0.0541	0.00663	3.2e-16		0.0084	0.00558498	0.135945		-0.00916	0.00631	0.147		-0.00609	0.0071	0.391		0.00015	0.0011	0.1587
13:40810596:G:C	13	40810596	G	C	-0.0745	0.0111	1.61e-11		-0.0154	0.00751434	0.0405618		-0.0093	0.0107	0.385		0.029	0.0111	0.0091		0.0002	0.1651	0.90675
13:42422412:G:T	13	42422412	G	T	0.0538	0.00571	4.54e-21		0.0037	0.00456953	0.428102		0.0154	0.00542	0.00439		-0.0131	0.00605	0.0301		0	0.8205	0.62705
13:42574410:C:G	13	42574410	C	G	0.0903	0.0148	9.51e-10		0.0144	0.0133024	0.279261		0.0226	0.0139	0.103		0.00311	0.0165	0.85		0.00045	0.59275	0.0708
13:50237019:G:T	13	50237019	G	T	0.0902	0.0121	9.81e-14		0.0094	0.0083267	0.258585		0.0449	0.0121	0.000216		-0.0152	0.0122	0.212		0	0.9966	0.3138
13:50586868:G:A	13	50586868	G	A	-0.0421	0.00628	1.97e-11		-0.0286	0.00548343	2.11e-07		-0.0172	0.00588	0.00348		0.00675	0.00685	0.325		0.9321	0.91765	0.2951
13:74119264:G:A	13	74119264	G	A	-0.0513	0.00813	2.79e-10		-0.0016	0.00639734	0.805444		-0.0142	0.00774	0.0667		-0.00597	0.0085	0.482		0.0002	0.6346	0.02935
13:99353731:C:CA	13	99353731	C	CA	-0.0454	0.00585	8.33e-15		NA	NA	NA		-0.0128	0.00553	0.0204		-0.0102	0.00622	0.1		NA	0.70405	0.00435
13:110553879:G:A	13	110553879	G	A	-0.0536	0.00696	1.34e-14		-0.026	0.00538189	1.54e-06		-0.00687	0.00659	0.297		-0.0162	0.00729	0.0265		0.3099	0.147	0.00095
14:34757605:C:T	14	34757605	C	T	-0.0496	0.00799	5.52e-10		-0.0021	0.00731125	0.768867		-0.0179	0.00734	0.0146		-0.000782	0.0088	0.929		0.00035	0.8511	0.0883
14:36140472:G:A	14	36140472	G	A	-0.054	0.00577	8.94e-21		-0.0371	0.00467107	2e-15		-0.00172	0.0055	0.754		-0.00344	0.00614	0.575		0.99945	0.0142	0.0082
14:36269155:C:T	14	36269155	C	T	-0.186	0.0162	1.56e-30		-0.1692	0.0149271	7.94e-30		-0.0128	0.0149	0.391		0.0328	0.016	0.0403		1	0.00105	0.39575
14:68286570:T:G	14	68286570	T	G	0.0565	0.00614	3.55e-20		0.0153	0.00497571	0.00212539		0.0225	0.00579	9.94e-05		-0.0121	0.00657	0.0665		0.00095	0.98955	0.493
14:74980176:C:G	14	74980176	C	G	0.032	0.00566	1.61e-08		0.0175	0.00467107	0.000198215		-0.00638	0.00536	0.234		-0.00664	0.00604	0.272		0.2965	0.0327	0.3814
14:80649689:A:T	14	80649689	A	T	-0.103	0.0166	4.74e-10		-0.0664	0.0170596	0.000102029		-0.0163	0.015	0.277		-0.0235	0.0182	0.196		0.87245	0.27025	0.0117
14:80982607:G:GA	14	80982607	G	GA	-0.0957	0.0114	6.33e-17		0.0696	0.0083267	4.53e-17		0.0149	0.0111	0.18		0.0126	0.0123	0.307		0	0	0.18015
14:93097224:C:A	14	93097224	C	A	0.0781	0.00716	1.02e-27		0.0827	0.00609271	3.19e-42		-0.00899	0.0069	0.192		-0.012	0.00769	0.118		1	0	0.2005
14:98202441:AAG:A	14	98202441	AAG	A	0.0505	0.0075	1.6e-11		0.0059	0.00944369	0.532613		-0.0176	0.00731	0.0162		-0.0202	0.00784	0.00979		0.00205	0.00085	0.87
14:98224057:A:T	14	98224057	A	T	0.0353	0.00562	3.64e-10		0.0031	0.00446798	0.490973		0.00348	0.00533	0.514		-0.0138	0.00599	0.0215		0.0021	0.1827	0.7495
14:104752139:A:G	14	104752139	A	G	-0.0432	0.0056	1.18e-14		-0.0379	0.00467107	5.46e-16		0.00138	0.0053	0.795		-0.00733	0.00598	0.221		0.99995	0.02175	0.0119
14:105759223:C:T	14	105759223	C	T	0.0502	0.00608	1.37e-16		NA	NA	NA		0.016	0.00571	0.00492		0.00218	0.00656	0.74		NA	0.86085	0.023
15:38551686:A:G	15	38551686	A	G	0.0691	0.00638	2.25e-27		0.0087	0.00528034	0.100784		0.038	0.00603	2.99e-10		0.00652	0.00684	0.34		0	1	0.00065
15:63373566:T:C	15	63373566	T	C	0.0517	0.00635	4e-16		0.006	0.00538189	0.258284		0.00321	0.00603	0.595		0.00535	0.00681	0.432		5e-05	0.0477	0.01155
15:63618234:G:T	15	63618234	G	T	-0.0346	0.00577	2.02e-09		0.008	0.00761588	0.297101		-0.0111	0.00542	0.0399		0.0121	0.00624	0.0527		0.00155	0.674	0.6486
15:65451289:G:A	15	65451289	G	A	-0.0383	0.00627	1.05e-09		-0.0156	0.00538189	0.00362094		0.00498	0.00587	0.396		-0.000847	0.00674	0.9		0.06025	0.0262	0.101
15:84712154:T:C	15	84712154	T	C	-0.0353	0.00562	3.43e-10		-0.0082	0.00456953	0.0716868		-0.00901	0.00531	0.0898		0.00462	0.00599	0.441		0.00725	0.5252	0.2576
15:88570646:T:C	15	88570646	T	C	-0.0459	0.00595	1.23e-14		-0.057	0.00487416	1.04e-31		-0.00396	0.00561	0.48		0.00101	0.00635	0.873		1	0.08795	0.06755
16:2689766:G:C	16	2689766	G	C	-0.0333	0.00568	4.39e-09		-0.0188	0.00680352	0.00575623		-0.0031	0.00539	0.565		-0.0135	0.00605	0.026		0.2439	0.20075	0.01635
16:3972637:T:C	16	3972637	T	C	0.057	0.00734	8.14e-15		0.0372	0.00660043	1.68e-08		0.0107	0.00696	0.123		-0.0288	0.00797	0.000311		0.9782	0.32455	0.9844
16:11734162:A:G	16	11734162	A	G	0.0489	0.00801	1e-09		0.0092	0.00700661	0.190156		0.0127	0.0075	0.0913		-0.02	0.00857	0.0194		0.0024	0.5649	0.8135
16:14306452:G:A	16	14306452	G	A	-0.0425	0.00567	6.8e-14		-0.0256	0.00467107	3.29e-08		0.0191	0.00538	0.000384		0.00535	0.00604	0.376		0.8284	0.00035	0.21805
16:27384341:C:CT	16	27384341	C	CT	0.173	0.0141	2.17e-34		0.0123	0.0453906	0.78632		0.129	0.0123	7.52e-26		-0.0866	0.0187	3.66e-06		0.00195	1	0.99985
16:28494339:G:C	16	28494339	G	C	0.0791	0.00838	3.83e-21		0.0104	0.0105607	0.32412		0.03	0.00803	0.000189		0.0425	0.00891	1.87e-06		0	0.9927	0
16:31429111:G:C	16	31429111	G	C	-0.0333	0.00611	4.96e-08		-0.0069	0.00507725	0.169699		-0.00969	0.00579	0.0944		0.0168	0.00645	0.00923		0.0103	0.57635	0.83035
16:50301163:C:A	16	50301163	C	A	0.351	0.0308	4.66e-30		0.1163	0.0350331	0.000914373		0.18	0.0289	4.45e-10		-0.0397	0.0351	0.259		0.0057	1	0.17015
16:50325014:G:C	16	50325014	G	C	-0.0622	0.00744	5.87e-17		-0.0047	0.00588961	0.417757		-0.00697	0.00704	0.322		0.00831	0.00779	0.286		0	0.0794	0.1912
16:57041268:A:G	16	57041268	A	G	-0.0422	0.00565	7.73e-14		-0.0087	0.00467107	0.0621923		-0.00458	0.00535	0.391		0.0161	0.00601	0.0073		0.00135	0.14545	0.8426
16:57533494:C:G	16	57533494	C	G	0.0428	0.00596	7.05e-13		0.0039	0.00487416	0.423229		0.0095	0.00562	0.0911		-0.00371	0.00643	0.564		0.0004	0.45275	0.162
16:67628912:T:A	16	67628912	T	A	0.105	0.0141	1.18e-13		0.0233	0.0118808	0.0507591		-0.0298	0.0136	0.0286		0.0286	0.0149	0.0553		0.00015	0.0001	0.00085
16:68100299:G:A	16	68100299	G	A	0.182	0.0309	3.97e-09		0.0424	0.019192	0.0269957		-0.0342	0.0329	0.298		-4e-05	0.0293	0.999		0.00405	0.0235	0.1082
16:79282918:A:G	16	79282918	A	G	-0.0564	0.0071	1.98e-15		-0.002	0.00548343	0.716586		0.00781	0.00684	0.253		0.0156	0.00745	0.0362		0	0.00165	0.6894
16:79716284:C:CA	16	79716284	C	CA	0.0791	0.00723	7.37e-28		0.0736	0.00467107	1.55e-56		-0.00263	0.0062	0.672		0.00465	0.00907	0.608		1	0.0001	0.0028
16:85934034:A:G	16	85934034	A	G	0.0387	0.00574	1.64e-11		0.0096	0.00477262	0.0440691		0.0118	0.00543	0.0301		0.00525	0.00614	0.393		0.00565	0.693	0.0305
16:85985910:G:C	16	85985910	G	C	-0.0355	0.0064	2.89e-08		-0.0108	0.00548343	0.0488562		-0.033	0.006	3.7e-08		-0.0021	0.00693	0.762		0.0205	0.9995	0.10535
16:88458157:C:T	16	88458157	C	T	0.0375	0.00609	6.94e-10		0.0163	0.0051788	0.00151808		-0.00596	0.00578	0.303		0.0186	0.00648	0.00407		0.08745	0.02015	0.0047
17:7337072:C:T	17	7337072	C	T	0.077	0.00694	1.28e-28		0.0104	0.00599116	0.0816137		0.0268	0.00666	5.67e-05		-0.0238	0.00733	0.00119		0	0.9941	0.95845
17:7826527:C:A	17	7826527	C	A	0.0535	0.00961	2.64e-08		-0.0013	0.00852979	0.877773		0.00566	0.00916	0.536		-0.038	0.0104	0.000258		0.0006	0.1894	0.9821
17:7863943:G:A	17	7863943	G	A	-0.0815	0.0146	2.19e-08		-0.036	0.0160441	0.0251555		-0.0249	0.013	0.0561		-0.00293	0.0166	0.86		0.09185	0.7438	0.1011
17:8961373:A:G	17	8961373	A	G	0.0678	0.00741	5.95e-20		0.0037	0.00649889	0.569153		0.0106	0.00689	0.124		-0.00285	0.00795	0.72		0	0.15035	0.0354
17:29618321:T:C	17	29618321	T	C	0.0332	0.00559	2.77e-09		-0.0032	0.00467107	0.486013		0.007	0.00529	0.185		-0.00362	0.00597	0.544		0.0014	0.40485	0.24035
17:39787478:C:A	17	39787478	C	A	-0.0981	0.0146	1.61e-11		0.0076	0.0118808	0.524686		-0.0163	0.0133	0.221		-0.016	0.0156	0.304		0	0.27165	0.0103
17:39822742:C:T	17	39822742	C	T	0.0512	0.00875	4.71e-09		-0.0035	0.0107638	0.741843		-0.00995	0.00811	0.22		0.0481	0.00981	9.34e-07		0.0008	0.00865	0.00035
17:42137394:T:C	17	42137394	T	C	0.0824	0.00707	2.17e-31		0.0181	0.00599116	0.00240435		0.0139	0.00668	0.0374		-0.0314	0.00773	4.97e-05		0	0.1218	0.9967
17:46019187:G:A	17	46019187	G	A	0.0532	0.00859	5.63e-10		0.0336	0.00629579	1.19e-07		-0.00856	0.00874	0.327		0.00216	0.00848	0.799		0.9434	0.0126	0.0519
17:47727128:C:T	17	47727128	C	T	0.07	0.00621	1.74e-29		-0.0003	0.0051788	0.955684		0.0151	0.00587	0.0101		-2.39e-05	0.00669	0.997		0	0.4899	0.0053
17:47733988:C:G	17	47733988	C	G	-0.119	0.0111	7.88e-27		-0.0192	0.0092406	0.0368252		-0.0128	0.0103	0.216		0.001	0.0115	0.931		0	0.01195	0.0025
17:61253946:A:C	17	61253946	A	C	-0.0739	0.0115	1.3e-10		-0.0621	0.0102561	1.63e-09		-0.0178	0.0108	0.099		0.0121	0.012	0.315		0.99975	0.546	0.3089
17:75767839:TGA:T	17	75767839	TGA	T	0.0658	0.00928	1.38e-12		-0.0023	0.00700661	0.735826		0.0168	0.0091	0.0651		-0.00559	0.00962	0.561		0	0.606	0.1319
17:77116349:A:G	17	77116349	A	G	0.0618	0.0101	8.21e-10		-0.0014	0.00781897	0.854522		-0.0274	0.00974	0.00497		0.0282	0.0106	0.00807		0.0001	0.0005	0.00175
17:82550914:C:T	17	82550914	C	T	-0.0409	0.00571	8.45e-13		-0.0116	0.00477262	0.0153209		0.00668	0.00541	0.217		0.0256	0.00613	2.9e-05		0.0076	0.0073	0.98825
18:12797695:A:G	18	12797695	A	G	0.0475	0.00588	6.67e-16		0.0102	0.00477262	0.031418		0.0455	0.00556	2.71e-16		-0.0205	0.00627	0.00107		0.00095	1	0.95185
18:26082413:A:G	18	26082413	A	G	-0.0402	0.00604	2.76e-11		0.0004	0.0051788	0.944752		-0.0154	0.00568	0.00661		0.00417	0.00647	0.519		0.0005	0.8725	0.2017
18:59514049:C:T	18	59514049	C	T	0.0401	0.00617	8.13e-11		0.0172	0.00507725	0.000693834		-0.00289	0.00584	0.621		-0.00375	0.00651	0.565		0.0831	0.0288	0.1869
18:62339745:C:G	18	62339745	C	G	-0.034	0.00566	1.98e-09		0.0001	0.00467107	0.976661		-0.00901	0.00537	0.0937		0.00731	0.00603	0.226		0.002	0.53715	0.399
18:69860373:A:G	18	69860373	A	G	-0.0517	0.0056	2.34e-20		-0.0071	0.00456953	0.116642		-0.0265	0.0053	5.6e-07		0.0193	0.00597	0.00123		0	0.99905	0.94345
18:79454594:G:A	18	79454594	G	A	0.0667	0.00768	3.67e-18		0.0043	0.00700661	0.537566		-0.00104	0.00729	0.886		-0.00598	0.00832	0.472		0	0.0042	0.09635
18:79516964:A:G	18	79516964	A	G	-0.041	0.00618	3.37e-11		-0.0048	0.00507725	0.343205		-0.00178	0.00587	0.761		0.00493	0.0065	0.448		0.00115	0.08905	0.22245
19:1167159:A:G	19	1167159	A	G	-0.0378	0.00563	2e-11		-0.0042	0.00528034	0.41915		-0.00782	0.00532	0.142		0.0121	0.00602	0.0442		0.00165	0.3971	0.6515
19:3159173:C:T	19	3159173	C	T	-0.0505	0.00877	8.08e-09		-0.0017	0.00883442	0.846935		-0.00926	0.00811	0.253		-0.0122	0.00951	0.199		0.0013	0.34295	0.02195
19:3179519:C:T	19	3179519	C	T	-0.0948	0.0147	1.12e-10		-0.0047	0.0389933	0.903188		0.019	0.0127	0.133		0.0161	0.0173	0.352		0.0236	0.0007	0.33985
19:4837475:A:G	19	4837475	A	G	-0.0668	0.00573	2.12e-31		-0.013	0.00487416	0.00755548		-0.0054	0.00543	0.319		0.0555	0.00614	1.74e-19		5e-05	0.00885	1
19:7240765:G:T	19	7240765	G	T	-0.0746	0.00626	9.37e-33		-0.0614	0.00558498	3.45e-28		0.0088	0.00588	0.134		-0.00707	0.00687	0.303		1	0	0.0002
19:8257849:G:T	19	8257849	G	T	-0.0893	0.0141	2.34e-10		-0.0974	0.0175673	2.68e-08		0.00412	0.0128	0.748		-0.0409	0.0153	0.00758		0.99975	0.01455	0.00145
19:8672590:A:ATTAG	19	8672590	A	ATTAG	-0.0493	0.00645	2.34e-14		-0.0095	0.00863133	0.274447		-0.000897	0.00604	0.882		0.0128	0.00693	0.065		0.00335	0.02995	0.5941
19:10101623:C:G	19	10101623	C	G	0.083	0.0147	1.81e-08		0.0288	0.0326975	0.378224		0.00401	0.0137	0.77		0.00143	0.0171	0.934		0.07895	0.1001	0.1192
19:10352442:G:C	19	10352442	G	C	-0.16	0.0156	1.17e-24		-0.0586	0.0129978	6.63e-06		-0.189	0.0153	3.33e-35		0.0542	0.0157	0.00055		0.0015	1	0.99285
19:11416089:T:G	19	11416089	T	G	-0.0453	0.00564	9.88e-16		-0.015	0.00660043	0.0227033		0.00552	0.00536	0.303		0.0161	0.00601	0.00724		0.01385	0.0045	0.8482
19:17047335:T:C	19	17047335	T	C	0.0322	0.00561	1.01e-08		0.0047	0.00467107	0.32292		0.0101	0.0053	0.0558		-0.015	0.00598	0.012		0.00615	0.6341	0.7994
19:18188028:AT:A	19	18188028	AT	A	-0.0421	0.00646	7.34e-11		-0.0014	0.00497571	0.775375		-0.0101	0.00616	0.102		0.0214	0.00687	0.00187		0.00035	0.50455	0.9334
19:18283951:A:G	19	18283951	A	G	0.0612	0.0059	3.31e-25		0.0143	0.00487416	0.00330145		0.0168	0.00559	0.00271		-0.0216	0.00625	0.000538		0.0001	0.83925	0.9688
19:21537632:CA:C	19	21537632	CA	C	0.154	0.0264	5.24e-09		0.0698	0.0386887	0.0713449		0.0102	0.0273	0.709		-0.00566	0.0257	0.825		0.1543	0.1776	0.1379
19:40278113:C:T	19	40278113	C	T	0.252	0.0316	1.54e-15		0.1497	0.045086	0.000892629		-0.0511	0.0294	0.0822		-0.0148	0.0422	0.725		0.8116	0.00025	0.1872
19:48703417:G:A	19	48703417	G	A	0.0424	0.00571	1.07e-13		-0.0058	0.00467107	0.215507		0.0315	0.00542	6.22e-09		-0.0231	0.00606	0.000137		0.0001	0.99975	0.9792
19:49648429:T:A	19	49648429	T	A	0.0501	0.00564	6.25e-19		0.0033	0.00507725	0.511998		0.00641	0.00534	0.23		-0.0356	0.00604	3.65e-09		0.0001	0.11705	0.9998
19:49665663:G:A	19	49665663	G	A	-0.274	0.0433	2.77e-10		0.0006	0.0429536	0.987986		-0.049	0.0421	0.244		0.22	0.0386	1.21e-08		0.00115	0.5153	0.9998
19:55228237:C:T	19	55228237	C	T	0.0567	0.00737	1.4e-14		0.0281	0.00599116	3.15e-06		-0.00362	0.00707	0.609		0.015	0.00783	0.0554		0.3545	0.0068	0.00195
19:57288250:T:C	19	57288250	T	C	-0.0319	0.00561	1.29e-08		-0.0106	0.00456953	0.0207578		0.00334	0.00531	0.529		0.000773	0.00599	0.897		0.0309	0.061	0.16575
20:17879062:A:G	20	17879062	A	G	-0.0598	0.00754	2.08e-15		0.0024	0.00619425	0.701881		-0.0175	0.00721	0.0151		0.0162	0.00777	0.0368		0	0.78715	0.6825
20:22605190:T:G	20	22605190	T	G	0.086	0.00694	2.91e-35		0.06	0.00548343	5.57e-28		-0.003	0.00649	0.644		-0.000819	0.00731	0.911		1	5e-05	0.00135
20:33085232:A:T	20	33085232	A	T	0.077	0.0127	1.27e-09		-0.0124	0.0152318	0.418553		0.0108	0.0116	0.351		-0.00801	0.0151	0.595		0.0001	0.2121	0.21995
20:48764453:T:C	20	48764453	T	C	0.0336	0.00579	6.92e-09		0.0016	0.00487416	0.748551		-0.0129	0.00549	0.0185		0.0128	0.00621	0.0386		0.00265	0.00685	0.0168
20:58891038:G:T	20	58891038	G	T	0.104	0.0182	1.27e-08		0.0469	0.0175673	0.00742559		0.0638	0.0175	0.000261		-0.0338	0.0196	0.0841		0.13985	0.9953	0.6828
21:15425772:G:T	21	15425772	G	T	-0.0465	0.00644	5.03e-13		-0.0079	0.00507725	0.12104		-0.0208	0.00617	0.000733		0.000239	0.00673	0.972		0.00075	0.9709	0.06375
21:25397195:T:C	21	25397195	T	C	-0.0469	0.00758	6.25e-10		0.0025	0.00649889	0.69655		-0.0113	0.00715	0.115		0.0172	0.00826	0.0371		0.0001	0.50715	0.74025
21:25457465:C:T	21	25457465	C	T	-0.0858	0.0122	1.68e-12		-0.006	0.0109669	0.584195		-0.0211	0.0111	0.056		0.0358	0.0132	0.00692		5e-05	0.6214	0.9341
21:33380488:C:A	21	33380488	C	A	0.0355	0.00602	3.63e-09		0.0074	0.00487416	0.129825		0.000743	0.00572	0.897		-0.000266	0.00641	0.967		0.0069	0.10745	0.12775
21:33658920:T:C	21	33658920	T	C	0.0317	0.00563	1.73e-08		0.0019	0.00456953	0.671867		0.0104	0.00532	0.0502		-0.00655	0.006	0.275		0.0035	0.6577	0.3772
21:42405613:G:C	21	42405613	G	C	0.0336	0.00605	2.8e-08		0.0007	0.00477262	0.879744		0.0229	0.00575	6.99e-05		-0.0192	0.00642	0.00284		0.0016	0.98405	0.8934
21:42431928:T:C	21	42431928	T	C	0.0408	0.0057	8.38e-13		0.0086	0.00477262	0.0705679		0.0248	0.00538	4.04e-06		-0.00145	0.00609	0.812		0.0023	0.9966	0.1065
22:21862666:A:T	22	21862666	A	T	-0.0387	0.00688	1.86e-08		0.0017	0.00538189	0.759992		-0.0141	0.00653	0.0305		0.00804	0.00722	0.265		0.001	0.76565	0.38255
22:29579458:A:G	22	29579458	A	G	-0.0422	0.00687	8.35e-10		-0.0105	0.00599116	0.0810872		-0.0148	0.00659	0.0251		0.00703	0.00726	0.333		0.00815	0.78345	0.30855
22:30116269:G:A	22	30116269	G	A	-0.0722	0.0056	5.16e-38		-0.0132	0.00456953	0.00384994		-0.011	0.0053	0.0386		0.0303	0.00598	4.02e-07		0	0.061	0.9996
22:31146151:A:G	22	31146151	A	G	-0.0401	0.00664	1.67e-09		-0.0271	0.00538189	5.01e-07		-0.00443	0.00638	0.487		-0.0127	0.00705	0.0713		0.8954	0.1997	0.01355
22:37187692:G:GC	22	37187692	G	GC	0.0908	0.00568	1.32e-57		0.0043	0.00741279	0.561135		0.0122	0.00539	0.0241		-0.0199	0.00605	0.00101		0	0.006	0.7903
22:38700597:T:C	22	38700597	T	C	0.0422	0.00571	1.43e-13		0.0169	0.00487416	0.000493231		0.0138	0.00541	0.0105		0.00549	0.0061	0.368		0.0471	0.8033	0.02195
22:39351775:G:A	22	39351775	G	A	0.0444	0.00598	1.06e-13		-0.0013	0.00497571	0.798643		0.0423	0.00564	6.5e-14		-0.0114	0.00641	0.0755		0.00025	1	0.5534
22:40339359:AT:A	22	40339359	AT	A	-0.0427	0.0068	3.25e-10		-0.0233	0.00609271	0.000136569		-0.00721	0.00637	0.258		0.000477	0.00728	0.948		0.37725	0.30175	0.10705
22:41428193:A:AAAT	22	41428193	A	AAAT	0.0457	0.00665	6.01e-12		0.0026	0.00588961	0.653595		0.0071	0.00619	0.251		-0.0191	0.00716	0.00753		0.0005	0.24515	0.8744
23:3694421:T:A	23	3694421	T	A	0.0363	0.00521	3.45e-12		0.0433	0.00690507	3.76e-10		0.00454	0.00451	0.315		-0.000314	0.00502	0.95		0.9997	0.19225	0.08365
23:13002332:A:G	23	13002332	A	G	-0.0343	0.00508	1.39e-11		0.0024	0.00619425	0.697735		-0.006	0.00439	0.172		0.00486	0.00488	0.319		0.00155	0.31185	0.26125
23:66072480:G:GTGTTTGTT	23	66072480	G	GTGTTTGTT	-0.0386	0.00675	1.1e-08		NA	NA	NA		-0.00475	0.00577	0.411		0.00584	0.00667	0.381		NA	0.21545	0.2904
23:78993122:C:T	23	78993122	C	T	-0.0557	0.00729	2.2e-14		-0.0005	0.0104591	0.961888		-0.0156	0.00613	0.0108		0.0102	0.0072	0.155		0.0005	0.77595	0.34835
23:79185670:A:C	23	79185670	A	C	-0.055	0.0052	3.53e-26		-0.0021	0.00619425	0.733951		3.51e-05	0.00452	0.994		0.0184	0.005	0.000237		0	0.00215	0.9625
23:154018741:A:G	23	154018741	A	G	-0.0441	0.00731	1.6e-09		-0.0049	0.0092406	0.594978		-0.0319	0.00626	3.43e-07		0.000921	0.00721	0.898		0.00405	0.99965	0.10515
23:155548829:G:A	23	155548829	G	A	-0.113	0.0202	2.36e-08		NA	NA	NA		-0.021	0.0154	0.173		0.035	0.0227	0.123		NA	0.3944	0.6232

## Sheet: ST4 - Thy Genetic Panel
Congenital thyroid panel genes from https://panelapp.genomicsengland.co.uk/
gene	pval R12 meta	beta R12 meta	rsid	variant
DUOX2
DUOXA2
FOXE1	0	0.24	rs13290258	9:97796811:C:T
GLIS3	1.03e-23	-0.06	rs10814915	9:4290544:T:C
GNAS	1.27e-08	0.1	rs185799410	20:58891038:G:T
HESX1
IGSF1
IRS4
IYD
LHX3
LHX4
NKX2-1
OTX2
PAX8
POU1F1
PRKAR1A
PROP1
SECISBP2	5.2e-06	-0.03	rs11265838	9:89414538:T:G
SLC16A2
SLC26A4
SLC26A7
SLC5A5	5.6e-06	-0.03	rs35113238	19:17903420:G:A
TBL1X
TG	9.93e-29	-0.0648	rs2068128	8:132905343:G:A
THRA
THRB
TPO	6.04e-83	0.11	rs11675342	2:1403856:C:T
TRHR
TSHB
TSHR	6.33e-17	-0.1	rs35277102	14:80982607:G:GA

## Sheet: ST 5 - PRS corr
ST4 - Top negative phenotypic associations with AIHT PRS
PHENO	beta	pval		FinnGen endpoint name
Basal cell carcinoma	-0.0728	1.65e-17		C3_BASAL_CELL_CARCINOMA_EXALLC
Basal cell carcinoma including primary care dx	-0.0707	5.17e-17		C3_BASAL_CELL_CARCINOMA_INCLAVO_EXALLC
Male reproductive cancers	-0.0656	1.85e-10		C3_MALE_GENITAL_EXALLC
Non-melanoma skin cancer	-0.0621	3.41e-12		C3_OTHER_SKIN_EXALLC
Prostate cancer	-0.0602	9.48e-09		C3_PROSTATE_EXALLC
Skin Cancer	-0.0589	8.33e-13		C3_SKIN_EXALLC
All Cancers	-0.0208	4.52e-06		C3_CANCER_EXALLC

## Sheet: ST 6 Full PGS PheWAS
Estimate	SE	z	p	AUC	Cases	Controls	OR	Endpoint	Phenotypic group (ICD10)	Description
0.614465	0.0107277	57.2785	0	0.658967	14521	104630	1.84867	HYPOTHY_REIMB	E4	Hypothyroidism, drug reimbursement
0.538982	0.00515381	104.579	0	0.64241	49055	329775	1.71426	E4_HYTHY_AI_STRICT	E4	Hypothyroidism, strict autoimmune
0.514268	0.00505162	101.803	0	0.637305	48392	397350	1.67241	E4_HYTHY_AI_STRICT_PURCH	E4	Hypothyroidism, strict autoimmune, 3 medication purchases required
0.502862	0.00651722	77.1589	0	0.627843	56383	104642	1.65345	HYPOTHY_LEVOTHY	RX	Hypothyroidism, levothyroxine purchases
0.502862	0.00651722	77.1589	0	0.627843	56383	104642	1.65345	HYPOTHY_PURCHASE	E4	Hypothyroidism and >3 levothyroxin purchases
0.499427	0.00647403	77.1431	0	0.626898	57286	104642	1.64778	HYPOTHYROIDISM	NEURO	Hypothyroidism (congenital or acquired)
0.475544	0.00471548	100.847	0	0.62666	57166	385630	1.60889	E4_HYTHYNAS	E4	Hypothyroidism, other/unspecified
0.473075	0.00468759	100.921	0	0.626246	57305	396428	1.60492	HYPOT_THYRO_INCL	K11	Hypothyreosis and Thyroxine purchase for inclusion criteria
0.389084	0.0102345	38.0168	0	0.611189	9582	364479	1.47563	T1D_WIDE1	DIAB	Type 1 diabetes, wide definition, subgroup 1
0.379596	0.00987622	38.4353	0	0.608459	10320	369161	1.46169	T1D_WIDE	DIAB	Type 1 diabetes, wide definition
0.403813	0.00435277	92.7714	0	0.607086	68103	385630	1.49752	E4_THYROID	E4	Disorders of the thyroid gland
0.309189	0.0035141	87.9855	0	0.584297	115447	338286	1.36232	AUTOIMMUNE	AUTOIMMUNE	Autoimmune diseases
0.281889	0.00338764	83.2111	0	0.576414	130392	323341	1.32563	E4_THYROID_CTRL_EXCLUSION	E4	Used for control exclusion in common control thyroid runs
0.184982	0.00316599	58.428	0	0.546488	187511	266222	1.2032	E4_ENDONUTRMET	E4	Endocrine, nutritional and metabolic diseases
0.544961	0.0145516	37.4502	5.96229e-307	0.663183	4348	410029	1.72454	THYROIDITIS_ILD	ILD	Thyroiditis, ILD-related definition
0.343725	0.00920442	37.3435	3.23809e-305	0.597612	11952	369038	1.41019	E4_DM1	E4	Type 1 diabetes
0.290601	0.00839999	34.5954	2.95866e-262	0.581619	14376	439357	1.33723	T1D_ICD9_10	DIAB	Sub-endpoint used in defining T1D endpoints
0.410169	0.0121531	33.7501	1.06408e-249	0.6181	6532	428397	1.50707	INSULIN_SHORT_HUMAN	RX	Insulin, fast-acting (human)
0.266573	0.00793008	33.6155	9.97357e-248	0.574275	16174	437559	1.30548	INSULIN_SHORTFAST	RX	Insulin, fast-acting or short human
0.269624	0.00805202	33.4852	7.91351e-246	0.575218	15686	428397	1.30947	INSULIN_FAST	RX	Insulin, fast-acting
0.302749	0.00950654	31.8464	1.47808e-222	0.586594	10819	341375	1.35357	RHEUMA_SEROPOS	RHEUMA	Seropositive rheumatoid arthritis
0.135057	0.00430229	31.3919	2.61234e-216	0.538489	63967	337247	1.1446	AUTOIMMUNE_NONTHYROID	AUTOIMMUNE	Autoimmune diseases excluding thyroid diseases
0.406816	0.0131002	31.0542	9.99914e-212	0.626892	5366	385630	1.50203	E4_THYTOXGOITDIF	E4	Thyrotoxicosis with diffuse goitre
0.290808	0.0094009	30.9341	4.1592e-210	0.585072	10814	442914	1.33751	RHEUMA_SEROPOS_WIDE	RHEUMA	Seropositive rheumatoid arthritis, wide
0.291067	0.009452	30.7942	3.13146e-208	0.585169	10688	442914	1.33785	RHEUMA_SEROPOS_OTH	RHEUMA	Other/unspecified seropositive rheumatoid arthritis
0.292653	0.00955487	30.6287	5.07971e-206	0.58584	10438	443295	1.33998	RHEUMA_SEROPOS_OTH_ICD10	RHEUMA	Other/unspecified seropositive rheumatoid arthritis (ICD-10)
0.252753	0.0082808	30.5228	1.29734e-204	0.571894	14818	287796	1.28757	M13_RHEUMA	M13	Rheumatoid arthritis
0.131296	0.0043547	30.1504	1.05896e-199	0.537592	62294	331969	1.14031	AUTOIMMUNE_NONTHYROID_STRICT	AUTOIMMUNE	Autoimmune diseases excluding thyroid diseases, strict definition
0.296215	0.00988606	29.9629	2.98998e-197	0.580662	12128	106310	1.34476	THYROID_DISORDER_IBD	GASTRO	Disorders of thyroid, IBD co-morbidities
0.233441	0.00780737	29.9001	1.96448e-196	0.567781	16127	437606	1.26294	M13_RHEUMA_INCLAVO	M13	Rheumatoid arthritis
0.18017	0.00624935	28.8301	8.99504e-183	0.551558	26134	427599	1.19742	K11_REIMB_202	GASTRO	KELA_REIMBURSEMENT_202
0.185692	0.00649189	28.6036	6.05926e-180	0.549549	25336	376677	1.20405	INSULINS	RX	Insulin medication
0.409985	0.0147798	27.7396	2.32695e-169	0.618835	4486	370057	1.5068	E4_DM1_STRICT	E4	Type 1 diabetes, strict (exclude DM2)
0.407464	0.0147109	27.698	7.37073e-169	0.618304	4526	369007	1.503	T1D	DIAB	Type1 diabetes, definitions combined
0.182301	0.00658838	27.6701	1.59745e-168	0.549196	24140	428397	1.19998	INSULIN_INTER_AND_LONG	RX	Insulin, intermediate and long-acting
0.161134	0.00598159	26.9383	7.8153e-160	0.546722	29165	366945	1.17484	ILD_IMMUNOSUPPRESSIVE	RX	ILD medications: immunosuppressive drugs
0.437293	0.0162535	26.9046	1.93795e-159	0.628468	3690	369007	1.54851	T1D_STRICT	DIAB	Type 1 diabetes, strict definition
0.144189	0.0054032	26.6859	6.85427e-157	0.539386	39202	287796	1.1551	M13_POLYARTHROPATHIES	M13	Polyarthropathies
0.291414	0.0111251	26.1944	3.076e-151	0.587816	7639	385630	1.33832	E4_THYTOXNAS	E4	Thyrotoxicosis, other and/or unspecified
0.435485	0.0167099	26.0615	9.9624e-150	0.628124	3481	364434	1.54571	T1D_STRICT1	DIAB	Type 1 diabetes, strict definition, subgroup 1
0.329264	0.012936	25.4533	6.49142e-143	0.599508	5426	443295	1.38995	RHEUMA_SEROPOS_STRICT	RHEUMA	Seropositive rheumatoid arthritis, strict definition
0.157892	0.00640323	24.6581	3.01173e-134	0.546045	24774	428959	1.17104	RX_CROHN_2NDLINE	RX	Second line medication for Crohn's disease
0.159348	0.0064853	24.5707	2.59912e-133	0.546446	24082	429651	1.17275	RX_L04AX	RX	L04AX Other immunosuppressants
0.438366	0.0181976	24.0892	3.24086e-128	0.628433	2947	450786	1.55017	T1D_EARLY	DIAB	Type1 diabetes, definitions combined, early onset
0.0899327	0.0037793	23.7961	3.66232e-125	0.525464	86788	366945	1.0941	ILD_MEDICATIONS	RX	ILD medications
0.0770782	0.00326387	23.6156	2.66658e-123	0.515835	260614	193119	1.08013	ANY_REIMB	SHARED	Any reimbursement code in KELA
0.287859	0.0123511	23.3064	3.82071e-120	0.587496	6059	378074	1.33357	RX_L01BA01	RX	Methotrexate
0.223419	0.00985079	22.6803	7.0034e-114	0.569351	9801	441605	1.25034	THYROTOXICOSIS	GASTRO	Thyrotoxicosis
0.0888858	0.00394483	22.5322	2.00563e-112	0.525262	78149	366945	1.09296	ILD_CORTISONE	RX	ILD medications: prednisolone, methylprednisolone, prednisone
0.0854254	0.00392063	21.7887	2.97018e-105	0.514385	125654	295780	1.08918	DM_COMORB_EXMORE	E4	Diabetes-related co-morbidities/complications
0.334703	0.0153908	21.7469	7.39481e-105	0.595333	3982	433007	1.39753	D3_ANAEMIA_B12_DEF	D3	Vitamin B12 deficiency anaemia
0.0837661	0.00397737	21.0606	1.82656e-98	0.523348	75659	378074	1.08737	IBD_DRUGS	RX	Inflammatory bowel disease treatment related agents
0.416184	0.0199762	20.834	2.12849e-96	0.63551	2190	336787	1.51616	AUTOIMMUNE_HYPERTHYROIDISM	E4	Autoimmune hyperthyroidism
0.0889409	0.00428526	20.7551	1.10336e-95	0.524688	63282	378074	1.09302	RX_H02AB06	RX	Oral corticosteroids
0.331648	0.016051	20.6622	7.59075e-95	0.611325	3437	450296	1.39326	E4_GRAVES_STRICT	E4	Graves disease, strict definition
0.0738507	0.00367441	20.0987	7.5812e-90	0.520985	93616	360117	1.07665	RX_CROHN_1STLINE	RX	First line medication for Crohn's disease
0.453565	0.0229018	19.8048	2.70846e-87	0.646871	1613	452120	1.57391	K11_ORAL_LICHEN_WIDE_HYPOT_THYRO	K11	Oral lichen ruber planus wide, hypothyreosis or thyroxin
0.153026	0.00779891	19.6215	1.01355e-85	0.535193	33700	104642	1.16536	D3_ANAEMIA	D3	Anaemias
0.08334	0.00425352	19.5932	1.7675e-85	0.519881	68356	368997	1.08691	KELA_DIAB_INSUL_EXMORE	DIAB	Diabetes, insulin treatment (Kela reimbursement)
0.0816231	0.00422385	19.3243	3.35231e-83	0.519541	68356	385377	1.08505	KELA_DIAB_INSUL	DIAB	Diabetes, insulin treatment (Kela reimbursement)
0.0956589	0.00496965	19.2486	1.44909e-82	0.527531	43704	405870	1.10038	ILD_SYST_AUTO_DISEASES	ILD	Autoimmune diseases related-to ILD
0.0749084	0.00390867	19.1647	7.30254e-82	0.51752	84695	369038	1.07779	E4_DIABETES	E4	Diabetes mellitus
0.074002	0.00391805	18.8874	1.44668e-79	0.51723	84277	369456	1.07681	DIABETES_FG	DIAB	Diabetes, varying definitions
0.684094	0.0362266	18.8838	1.55146e-79	0.726757	612	385630	1.98198	E4_THYROIDITAUTOIM	E4	Autoimmune thyroiditis
0.0753853	0.00403907	18.664	9.71464e-78	0.517677	77056	376408	1.0783	DIAB_MED	RX	Diabetes medication
0.207104	0.0112988	18.3297	4.79499e-75	0.562346	7314	446419	1.23011	RHEUMA_OTHER_WIDE	RHEUMA	Other (seronegative) rheumatoid arthritis, wide
0.161943	0.00891649	18.1622	1.02868e-73	0.542758	12681	426197	1.17579	DM_RETINOPATHY	DIAB	Diabetic retinopathy
0.521989	0.0291525	17.9055	1.06875e-71	0.664169	1006	385630	1.68538	E4_CONGEIOD	E4	Congenital iodine-deficiency syndrome/hypothyroidism
0.248478	0.0141425	17.5696	4.21338e-69	0.573601	4589	449037	1.28207	RHEUMA_NOS	RHEUMA	Other/unspecified rheumatoid arthritis
0.145093	0.00829773	17.4859	1.83574e-68	0.542904	14309	439424	1.15615	M13_SYSTCONNECT	M13	Systemic connective tissue disorders
0.190077	0.0108789	17.4721	2.33675e-68	0.556727	7868	445865	1.20934	RX_L04AA	RX	L04AA Selective immunosuppressants
0.0777857	0.00448961	17.3257	3.00945e-67	0.519092	131176	104642	1.08089	ANTIDEPRESSANTS	NEURO	Depression medications
0.247178	0.0143116	17.2711	7.76289e-67	0.573206	4568	433899	1.28041	K11_COELIAC	K11	Coeliac disease
0.413043	0.0239888	17.2181	1.94233e-66	0.635011	1454	441650	1.51141	D1_ICD8	DIAB	ICD-8 DM (Sub-endpoint used for defining DM endpoints)
0.0572518	0.00355244	16.1162	1.96365e-58	0.514113	112358	341375	1.05892	RHEUMA_ENDPOINTS	RHEUMA	Finngen Rheumatological endpoints
0.136811	0.00868657	15.7497	6.90485e-56	0.539804	12814	378074	1.14661	RX_A07EC01	RX	Sulfasalazine
0.150853	0.00960756	15.7014	1.47832e-55	0.543882	10681	341375	1.16283	OTHER_SYSTCON_FG	RHEUMA	Other systemic involvement of connective tissue (FG)
0.297478	0.0189572	15.6921	1.71385e-55	0.593261	2436	441605	1.34646	THYROIDITIS	GASTRO	Thyroiditis
0.0628454	0.00405572	15.4955	3.72076e-54	0.514656	203840	106310	1.06486	NEURODIS	GASTRO	Neurological diseases
0.229655	0.0148814	15.4323	9.92539e-54	0.565229	4248	369362	1.25817	DM_MACULOPATHY_EXMORE	DIAB	Diabetic maculopathy
0.0941403	0.00620685	15.1672	5.83396e-52	0.523178	28876	413784	1.09871	H7_RETINALDISOTH	H7	Other retinal disorders
0.21102	0.0141346	14.9293	2.12489e-50	0.564038	4567	341375	1.23494	RHEUMA_SERONEG	RHEUMA	Seronegative rheumatoid arthritis
0.0630064	0.00423976	14.8608	5.9185e-50	0.514186	69640	384093	1.06503	E4_METABOLIA	E4	Metabolic disorders
0.139208	0.00943579	14.7532	2.93625e-49	0.541531	10882	439424	1.14936	M13_OTHCONN	M13	Other systemic involvement of connective tissue
0.161892	0.0109908	14.7298	4.15166e-49	0.552179	7679	446054	1.17573	GRAVES_COND	E4	Carbimazole or st.post thyroidectomy, condition for graves disease
0.0670172	0.00467207	14.3442	1.15763e-46	0.517924	52361	401372	1.06931	D3_BLOOD_IMMUN	D3	Diseases of the blood and blood-forming organs and certain disorders involving the immune mechanism
0.0491188	0.00352686	13.9271	4.33819e-44	0.507557	155745	297988	1.05035	RX_STATIN	RX	Statin medication
0.0588569	0.00426395	13.8034	2.4314e-43	0.50766	137388	231952	1.06062	FG_HYPERTENSION	CARDIO	Hypertensive diseases (excluding secondary)
0.154274	0.0111794	13.7998	2.55442e-43	0.545177	7450	446283	1.16681	K11_LICHEN_PLANUS_WIDE	K11	Lichen ruber planus, wide definition including periferal and oral lichen planus
0.105603	0.00774072	13.6426	2.23537e-42	0.530244	16313	437420	1.11138	L12_PAPULOSQUAMOUS	L12	Papulosquamous disorders
0.175879	0.0129578	13.5732	5.77683e-42	0.554265	5459	448274	1.19229	RX_RHEUMA_BIOLOGICAL	RX	Biological medication for rheuma
0.0957349	0.00707238	13.5365	9.52812e-42	0.526432	20726	433007	1.10047	D3_NUTRIANAEMIA	D3	Nutritional anaemias
0.0459762	0.00341573	13.4601	2.68459e-41	0.506927	240395	213338	1.04705	RX_ANTIHYP	RX	Antihypertensive medication - note that there are other indications
0.161384	0.0120476	13.3955	6.42193e-41	0.546652	6379	447354	1.17514	L12_LICHENPLANUS_INCLAVO	L12	Lichen planus, including avohilmo
0.130911	0.00979159	13.3697	9.0846e-41	0.544519	13942	50504	1.13987	DM1_RETINOPATHY	E4	Type 1 diabetes with retinopathy
0.123735	0.0094172	13.1392	1.96224e-39	0.535642	11226	385082	1.13172	K11_CHRONGASTR	K11	Chronic gastritis
-0.093659	0.00714583	-13.1068	3.01007e-39	0.474768	23424	345118	0.910593	C3_BASAL_CELL_CARCINOMA_EXALLC	C3	Basal cell carcinoma
0.0526317	0.00403046	13.0585	5.68528e-39	0.511571	79190	369038	1.05404	E4_DM2	E4	Type 2 diabetes
-0.0922186	0.00707775	-13.0294	8.33108e-39	0.475221	23936	344784	0.911906	C3_BASAL_CELL_CARCINOMA_INCLAVO_EXALLC	C3	Basal cell carcinoma, including avohilmo
0.130358	0.0100898	12.9197	3.48496e-38	0.533245	12681	51410	1.13924	DM_RETINOPATHY_EXMORE	DIAB	Diabetic retinopathy
0.174927	0.013697	12.7712	2.37531e-37	0.548401	5042	431022	1.19116	DM_NEPHROPATHY	DIAB	Diabetic nephropathy
0.408616	0.0321143	12.7238	4.36051e-37	0.644432	778	412885	1.50473	H7_LACRIMALORBITINOTH	H7	Disorders of lacrimal system and orbit in diseases classified elsewhere
0.039907	0.00315396	12.653	1.0769e-36	0.510005	165937	287796	1.04071	M13_ARTHROPATHIES	M13	Arthropathies
0.0482001	0.00382909	12.5879	2.46244e-36	0.507612	116714	316345	1.04938	I9_HYPTENSESS	I9	Hypertension, essential
0.0386333	0.00307574	12.5607	3.4742e-36	0.509533	251759	201974	1.03939	K11_GIDISEASES	K11	Gastrointestinal diseases
0.171093	0.0136484	12.5358	4.75604e-36	0.553068	4898	448835	1.1866	RX_L04AB	RX	Tumor necrosis factor alpha inhibitors
0.406526	0.0324448	12.5298	5.12924e-36	0.644587	761	452972	1.50159	GRAVES_OPHT	E4	Graves ophthalmopathy
-0.0830377	0.0066479	-12.4908	8.37845e-36	0.477714	27435	345118	0.920316	C3_SKIN_EXALLC	C3	Malignant neoplasm of skin
0.0451366	0.00361865	12.4733	1.04398e-35	0.507009	137388	316345	1.04617	I9_HYPERTENSION	I9	Hypertensive diseases
0.0451071	0.00361963	12.4618	1.20634e-35	0.507003	137312	316345	1.04614	I9_HYPTENS	I9	Hypertension
0.0615601	0.00495804	12.4162	2.13374e-35	0.512556	49101	370829	1.06349	T2D_WIDE	DIAB	Type 2 diabetes, wide definition
-0.0883696	0.00714916	-12.3608	4.25696e-35	0.47589	23503	345118	0.915422	C3_OTHER_SKIN_EXALLC	C3	Other malignant neoplasms of skin (=non-melanoma skin cancer)
0.0657703	0.0053474	12.2995	9.11554e-35	0.515915	39949	413784	1.06798	H7_CHOROIDRETINA	H7	Disorders of choroid and retina
0.763093	0.0623264	12.2435	1.81998e-34	0.772264	185	385630	2.1449	E4_HYTHYPOSTINF	E4	Postinfectious hypothyroidism
0.042905	0.00352496	12.1718	4.39484e-34	0.506402	247713	206020	1.04384	I9_CVD	I9	Cardiovascular diseases
0.211195	0.0173694	12.159	5.14027e-34	0.562955	3087	450646	1.23515	E4_GLUCOPANCREAS	E4	Other disorders of glucose regulation and pancreatic internal secretion
-0.0837656	0.00690876	-12.1246	7.82807e-34	0.475789	23424	430309	0.919647	C3_BASAL_CELL_CARCINOMA	C3	Basal cell carcinoma
0.103494	0.00856658	12.0811	1.32871e-33	0.529565	13415	341375	1.10904	RHEU_ARTHRITIS_OTH	RHEUMA	Other arthritis (FG)
0.173735	0.0143835	12.0788	1.3677e-33	0.550741	4395	437420	1.18974	L12_LICHENPLANUS	L12	Lichen planus
-0.0824167	0.00684104	-12.0474	2.00202e-33	0.476234	23936	429797	0.920888	C3_BASAL_CELL_CARCINOMA_INCLAVO	C3	Basal cell carcinoma, including avohilmo
0.0429891	0.00358086	12.0052	3.33474e-33	0.50567	221781	231952	1.04393	FG_CVD	CARDIO	Cardiovascular diseases (excluding rheumatic etc)
0.171534	0.0143495	11.954	6.18664e-33	0.554017	4403	384093	1.18712	E4_ENDOMETPOSTOP	E4	Postprocedural endocrine and metabolic disorders, not elsewhere classified
0.163457	0.0137745	11.8667	1.76342e-32	0.550744	4811	384093	1.17758	E4_METABO	E4	Other metabolic disorders
0.0526596	0.00447514	11.7671	5.76551e-32	0.507477	75592	378141	1.05407	I9_IHD	I9	Ischaemic heart disease, wide definition
0.0364573	0.00310626	11.7367	8.26564e-32	0.508267	266517	187216	1.03713	M13_MUSCULOSKELETAL	M13	Diseases of the musculoskeletal system and connective tissue
0.107903	0.00923061	11.6897	1.43918e-31	0.531222	11511	287796	1.11394	M13_ARTHRITISNAS	M13	Other specified/unspecified arthritis
0.0585573	0.00503594	11.6279	2.97396e-31	0.508501	56685	378019	1.06031	I9_CORATHER	I9	Coronary atherosclerosis
-0.0740701	0.00642717	-11.5245	9.92481e-31	0.478694	27435	426298	0.928607	C3_SKIN	C3	Malignant neoplasm of skin
0.280526	0.0243427	11.524	9.98374e-31	0.600418	1784	51410	1.32383	DM1_NEPHROPATHY	E4	Type 1 diabetes with nephropathy
0.279271	0.0242676	11.508	1.20298e-30	0.592145	1447	412885	1.32217	H7_ORBIT	H7	Disorders of orbit
0.0511694	0.00445305	11.4909	1.46652e-30	0.507234	75714	378019	1.0525	I9_ISCHHEART	I9	Ischemic heart diseases
-0.0790699	0.00691812	-11.4294	2.98211e-30	0.476872	23503	426298	0.923975	C3_OTHER_SKIN	C3	Other malignant neoplasms of skin (=non-melanoma skin cancer)
0.39842	0.0350934	11.3531	7.15569e-30	0.640397	646	453087	1.48947	E4_GRAVES_OPHT_STRICT	E4	Graves ophthalmopathy, strict
0.095991	0.0085375	11.2435	2.49396e-29	0.529772	13322	440411	1.10075	E4_HYTHY_AI_EXCL	E4	Developmental endpoint to exclude non autoimmune-cases from E4_HYTHY_AI_STRICT
0.036228	0.00322246	11.2423	2.52589e-29	0.509781	141837	311896	1.03689	AB1_INFECT_PARASIT	AB1	Certain infectious and parasitic diseases
0.232215	0.02069	11.2235	3.12534e-29	0.57437	2027	448835	1.26139	RX_L04AB01	RX	Etanercept
0.132565	0.0118457	11.191	4.51508e-29	0.537219	6764	446969	1.14175	N14_GLOMERULAR	N14	Glomerular diseases
0.0394018	0.00352483	11.1784	5.20479e-29	0.510293	134582	217833	1.04019	Z21_OTHER_SPECIAL_EXAM_INVES_PERSONS_WO_COMPLA_REPOR_DIAGNOSIS	Z21	Other special examinations and investigations of persons without complaint or reported diagnosis
0.216997	0.0195755	11.0851	1.48144e-28	0.565535	2406	450646	1.24234	E4_HYPOGLYC	E4	Hypoglycaemia, other or unspecified
0.0534738	0.00487509	10.9688	5.39918e-28	0.508757	58975	394758	1.05493	I9_HEARTFAIL_NS	I9	Heart failure, not strict
0.177336	0.0162641	10.9035	1.10926e-27	0.551997	3514	395832	1.19403	G6_DIABETNEUR	G6	Diabetic neuropathy
0.0544736	0.00509941	10.6823	1.23147e-26	0.508496	51098	402635	1.05598	I9_CHD	I9	Major coronary heart disease event
0.05154	0.00484696	10.6335	2.08229e-26	0.510553	50955	384093	1.05289	E4_LIPOPROT	E4	Disorders of lipoprotein metabolism and other lipidaemias
0.0343336	0.00324989	10.5645	4.35076e-26	0.509612	136974	316759	1.03493	L12_SKIN_SUBCUTAN	L12	Diseases of the skin and subcutaneous tissue
-0.0406075	0.00385477	-10.5343	6.00028e-26	0.490056	100190	345118	0.960206	C3_CANCER_EXALLC	C3	Malignant neoplasm
0.0316247	0.00301388	10.493	9.30109e-26	0.509161	235900	217833	1.03213	Z21_PERSONS_ENCOUNTERI_HEALTH_SERVI_EXAM_INVES	Z21	Persons encountering health services for examination and investigation
0.0318865	0.00304017	10.4884	9.7669e-26	0.50852	196153	250671	1.0324	PULMONARYDG	ASTHMA	Other pulmonary diagnosis
0.0314067	0.00300935	10.4364	1.69116e-25	0.50839	204313	249420	1.03191	ILD_DIFF_DG	ILD	ILD differential diagnosis
-0.0398854	0.00382709	-10.4219	1.9705e-25	0.490149	100190	353543	0.9609	C3_CANCER	C3	Malignant neoplasm
0.032217	0.00309572	10.4069	2.30522e-25	0.50726	176220	277513	1.03274	G6_NEURO	G6	Neurological diseases
0.0311711	0.00301131	10.3513	4.12745e-25	0.508386	203062	250671	1.03166	ASTHMA_EXCL	ASTHMA	Excluding asthma or asthma-COPD overlap
0.0311528	0.00300956	10.3513	4.12937e-25	0.508307	204044	249689	1.03164	COPD_EXCL	COPD	COPD differential diagnosis
-0.0384282	0.00373871	-10.2785	8.8126e-25	0.490518	108592	345141	0.962301	C3_CANCER_WIDE	C3	Malignant neoplasm, wide definition for exclusion
-0.0383876	0.0037388	-10.2673	9.88869e-25	0.49052	108592	345118	0.96234	C3_CANCER_WIDE_EXALLC	C3	Malignant neoplasm, wide definition for exclusion
0.17509	0.0171398	10.2154	1.69146e-24	0.558357	2981	439424	1.19135	M13_SJOGREN	M13	Sicca syndrome [Sj√∂gren]
0.152643	0.0151095	10.1024	5.3881e-24	0.545376	4046	446969	1.16491	N14_GLOMEINOTH	N14	Glomerular disorders in diseases classified elsewhere
0.0452441	0.00450947	10.0331	1.09015e-23	0.506261	72410	381323	1.04628	I9_CVD_HARD	CARDIO	Hard cardiovascular diseases
0.0573832	0.00572326	10.0263	1.16791e-23	0.507689	40366	378019	1.05906	I9_ANGINA	I9	Angina pectoris
0.146305	0.0146609	9.97926	1.87867e-23	0.543007	4403	439424	1.15755	M13_POLYMYALGIA	M13	Polymyalgia rheumatica
0.0686549	0.00688044	9.97827	1.89738e-23	0.510192	26345	378019	1.07107	I9_REVASC	I9	Coronary revascularization (ANGIO or CABG)
0.0705207	0.00713112	9.88914	4.64003e-23	0.519906	19856	337881	1.07307	J10_CHRONSINUSITIS	J10	Chronic sinusitis
0.0784547	0.00797182	9.8415	7.45903e-23	0.512566	26613	231952	1.08161	FG_DOAAC	I9	Diseases of arteries, arterioles and capillaries (FINNGEN)
0.410353	0.0417039	9.83968	7.59515e-23	0.651847	440	453293	1.50735	K11_ORAL_LICHEN_HYPOT_THYRO	K11	Oral lichen ruber planus, hypothyreosis or thyroxin
0.14214	0.0145312	9.7817	1.34929e-22	0.533054	5403	106310	1.15274	IBD_PULM	GASTRO	Respiratory diseases principally affecting the interstitium, IBD co-morbidites
0.0429753	0.00439914	9.76903	1.52905e-22	0.510586	57901	395832	1.04391	G6_NERPLEX	G6	Nerve, nerve root and plexus disorders
-0.0359573	0.00370586	-9.70282	2.93278e-22	0.491202	107477	346256	0.964681	ANY_CANC	SHARED	Any event in cancer register
0.0734039	0.00757585	9.6892	3.35156e-22	0.515716	18951	420324	1.07617	I9_PAD	I9	Peripheral artery disease
0.216537	0.0225526	9.60145	7.88313e-22	0.566594	1798	341375	1.24177	JUVEN_ARTHR	RHEUMA	Juvenile arthritis (FINNGEN)
0.0814645	0.00848541	9.60055	7.95223e-22	0.5244	13432	440301	1.08487	K11_LIVER	K11	Diseases of liver
0.0559727	0.00583351	9.59503	8.38911e-22	0.512178	33409	420324	1.05757	I9_DOAAC	I9	Diseases of arteries, arterioles and capillaries
0.2581	0.0269698	9.56994	1.0697e-21	0.591821	1388	51410	1.29447	DM1_NEUROPATHY	E4	Type 1 diabetes with neuropathy
0.377674	0.0395298	9.55417	1.24582e-21	0.630373	504	385630	1.45889	E4_THYROIDITNAS	E4	Thyroiditis, unspecified
0.051816	0.00545647	9.49626	2.17563e-21	0.508082	43101	402144	1.05318	I9_CHD_NOREV	I9	Major coronary heart disease event excluding revascularizations
0.250659	0.0264083	9.49165	2.27403e-21	0.582922	1220	287796	1.28487	M13_ARTHINOTH	M13	Arthropathies in other diseases classified elsewhere
0.0303732	0.00320355	9.48112	2.51577e-21	0.506175	189686	264047	1.03084	H7_EYE_ADNEXA	H7	Diseases of the eye and adnexa
0.0529033	0.00558434	9.47351	2.70596e-21	0.510821	36338	384093	1.05433	E4_HYPERCHOL	E4	Pure hypercholesterolaemia
0.248699	0.0264589	9.39943	5.48594e-21	0.582778	1198	338286	1.28236	SLE_FG	RHEUMA	SLE (Finngen)
0.0485118	0.00519913	9.33074	1.05136e-20	0.514185	41292	287796	1.04971	M13_JOINTOTH	M13	Other specific joint derangements/joint disorders
0.138552	0.0148504	9.32986	1.06009e-20	0.539202	5042	51410	1.14861	DM_NEPHROPATHY_EXMORE	DIAB	Diabetic nephropathy
0.7086	0.0763969	9.27524	1.77222e-20	0.750333	123	453121	2.03114	E4_HYTHY_AI_DX	E4	Hypothyroidism, autoimmune, DX-based
0.22559	0.0243397	9.2684	1.88956e-20	0.567425	1548	287796	1.25306	M13_JUVEARTH	M13	Other juvenile arthritis
0.0429612	0.00464216	9.25456	2.15109e-20	0.510379	54584	399149	1.0439	AB1_OTHER_BACTERIAL	AB1	Other bacterial diseases
0.0605984	0.00659115	9.1939	3.78857e-20	0.510301	28546	378019	1.06247	I9_MI_STRICT	I9	Myocardial infarction, strict
0.060539	0.00664521	9.11018	8.2248e-20	0.509541	26345	427388	1.06241	I9_REVACS	I9	Emergency coronary revascularization (for ACS)
0.0273581	0.00300391	9.10747	8.43216e-20	0.507144	249461	204272	1.02774	J10_RESPIRATORY	J10	Diseases of the respiratory system
0.0568894	0.0062943	9.03823	1.59225e-19	0.509507	31936	378019	1.05854	I9_MI	I9	Myocardial infarction
0.0299728	0.00331963	9.02896	1.73305e-19	0.507146	318238	135495	1.03043	R18_SYMPTOMS_SIGNS_ABNORMAL_CLINI_LABOR_FINDI_NOT_ELSEW_CLASSIFIED	R18	Symptoms, signs and abnormal clinical and laboratory findings, not elsewhere classified
0.0535544	0.0059449	9.00845	2.08985e-19	0.516716	29160	424573	1.05501	E4_NUTRIDEF	E4	Other nutritional deficiencies
0.0373567	0.00416558	8.96793	3.02149e-19	0.509881	68651	385082	1.03806	K11_OESSTODUO	K11	Diseases of oesophagus, stomach and duodenum
0.0817357	0.00912492	8.95742	3.32372e-19	0.524182	11479	437420	1.08517	L12_PSORIASIS	L12	Psoriasis
0.0509121	0.00569544	8.93909	3.92386e-19	0.51556	34952	240864	1.05223	JOINTPAIN	M13	Pain in joint
0.17658	0.0198735	8.88518	6.3817e-19	0.55486	2190	451543	1.19313	M13_MCTD	M13	Mixed connective tissue disease
0.047495	0.00541901	8.76451	1.87587e-18	0.50657	47841	328079	1.04864	C_STROKE	DIAB	STROKE
0.0297978	0.00340817	8.74304	2.26923e-18	0.507571	120126	333607	1.03025	R18_GENERAL_SYMPTOMS_SIGNS	R18	General symptoms and signs
0.0277144	0.00317527	8.72821	2.58738e-18	0.505573	174010	279723	1.0281	RX_PARASETAMOL	RX	Parasetamol
0.10845	0.0124349	8.72141	2.74754e-18	0.532358	6084	366945	1.11455	ILD_AZATHIOPRINE	RX	ILD medications: azathioprine
0.0291159	0.00335853	8.66924	4.35022e-18	0.50711	124240	329493	1.02954	RX_OPIOIDS	RX	Opioids
0.0419426	0.00487478	8.60399	7.69928e-18	0.510264	52144	238922	1.04283	J10_ASTHMA_EXMORE	J10	Asthma
0.0256671	0.00301395	8.51611	1.64997e-17	0.506831	212869	239973	1.026	PAIN	MISC	Pain (limb, back, neck, head abdominally)
0.0544329	0.00639474	8.51214	1.70754e-17	0.514857	25620	366465	1.05594	J10_SINUSITIS	J10	Acute sinusitis
0.105519	0.0124331	8.48691	2.12198e-17	0.531368	6084	378074	1.11129	RX_L04AX01	RX	Azathioprine
0.0386263	0.00456658	8.45846	2.7092e-17	0.511628	100406	98965	1.03938	RX_COXIBS	RX	Coxibs
0.147964	0.0175065	8.45197	2.86419e-17	0.542893	3503	51410	1.15947	DM_NEUROPATHY	DIAB	Diabetic neuropathy
0.287865	0.0340637	8.45081	2.89293e-17	0.5957	691	338286	1.33358	CHIRBIL_PRIM	GASTRO	Primary biliary cholangitis (PBC)
0.0409348	0.00484715	8.44512	3.03722e-17	0.510134	52144	248261	1.04178	J10_ASTHMA	J10	Asthma
0.127923	0.0151586	8.43897	3.20153e-17	0.540418	3897	287796	1.13647	M13_PSORIARTH	M13	Psoriatic arthropathies
0.0278624	0.00330881	8.42067	3.74352e-17	0.507067	127203	326530	1.02825	M13_SOFTTISSUE	M13	Soft tissue disorders
0.233387	0.0278344	8.38482	5.08026e-17	0.574486	1089	440301	1.26287	K11_CHRONHEP	K11	Chronic hepatitis, not elsewhere classified
0.041437	0.0049555	8.36181	6.17635e-17	0.504966	94162	231952	1.04231	FG_OTHHEART	CARDIO	Other heart diseases
0.0287523	0.00343959	8.35924	6.31241e-17	0.507156	111849	341884	1.02917	G6_EPIPAROX	G6	Episodal and paroxysmal disorders
0.143336	0.0172517	8.30852	9.69004e-17	0.545033	2980	448835	1.15412	RX_L04AB04	RX	Adalimumab
0.0388825	0.00474348	8.19704	2.46376e-16	0.510458	50302	403431	1.03965	AB1_INTESTINAL_INFECTIONS	AB1	Intestinal infectious diseases
0.0590501	0.00721393	8.18557	2.71027e-16	0.515407	19834	433899	1.06083	K11_OTHDIG	K11	Other diseases of the digestive system
0.594801	0.0727926	8.17117	3.05413e-16	0.730352	131	385630	1.81267	E4_THYROIDITCHRON	E4	Chronic thyroiditis
0.12113	0.0148897	8.13518	4.11319e-16	0.538464	4041	437420	1.12877	L12_PSORI_ARTHRO	L12	Arthropathic psoriasis
0.0300048	0.00369002	8.13135	4.24549e-16	0.50775	99586	287796	1.03046	M13_OTHERJOINT	M13	Other joint disorders
0.0420358	0.00517107	8.12903	4.32725e-16	0.510328	40848	412885	1.04293	H7_LIDLACRIMALORBIT	H7	Disorders of eyelid, lacrimal system and orbit
0.074679	0.00922299	8.09705	5.63093e-16	0.518917	11929	384093	1.07754	E4_FLUIDELECTRO	E4	Other disorders of fluid, electrolyte and acid-base balance
0.114025	0.0140893	8.09299	5.82153e-16	0.535941	4547	341375	1.12078	PSOR_ENTE_ARTHR	RHEUMA	Psoriatic and enteropathic arthropathies
0.170245	0.0210867	8.07357	6.82729e-16	0.550548	1995	341375	1.1856	NECROVASC_FG	RHEUMA	Other necrotizing vasculopathies (FG)
0.0303886	0.00378837	8.02156	1.04407e-15	0.508825	286737	98965	1.03086	RX_PROPIONIX	RX	Propionic acid derivatives
0.039818	0.00497312	8.00666	1.17867e-15	0.509795	48913	249420	1.04062	ASTHMA_MODE	COPD	Asthma (mode)
0.0873385	0.0109096	8.00565	1.18833e-15	0.521121	10032	106310	1.09127	IBD_INFECTIONS	GASTRO	Infections, IBD-co-morbidities
0.0622725	0.00782361	7.95957	1.72641e-15	0.512445	17832	420324	1.06425	I9_ATHSCLE	I9	Atherosclerosis, excluding cerebral, coronary and PAD
0.0463732	0.00586633	7.90498	2.67967e-15	0.512222	30692	423041	1.04747	L12_OTHERSKINSUBCUTIS	L12	Other disorders of skin and subcutaneous tissue
0.15576	0.0197205	7.89839	2.82537e-15	0.546463	2292	439424	1.16855	M13_NECROVASC	M13	Other necrotizing vasculopathies
0.040496	0.00515055	7.86247	3.76641e-15	0.510318	41659	329493	1.04133	RX_TRAMADOL	RX	Tramadol
0.0321662	0.00410424	7.83732	4.60264e-15	0.508419	71544	329493	1.03269	RX_CODEINE	RX	Codeine
0.0602523	0.00769556	7.82949	4.89871e-15	0.507717	31527	213338	1.0621	I9_HEARTFAIL_AND_ANTIHYPERT	CARDIO	Heart failure and antihypertensive medication
0.0884981	0.0113141	7.82193	5.20209e-15	0.502004	8807	195394	1.09253	NIV	COPD	Non-invasive ventilation
0.128792	0.0165088	7.80139	6.12297e-15	0.537066	3628	217833	1.13745	Z21_SPECIAL_SCREEN_EXAM_OTH_DISEA_DISORD	Z21	Special screening examination for other diseases and disorders
0.0353585	0.0045359	7.79525	6.42822e-15	0.509449	56150	397583	1.03599	K11_GALLBILPANC	K11	Disorders of gallbladder, biliary tract and pancreas
0.0275556	0.00354653	7.76973	7.86536e-15	0.50811	341432	112301	1.02794	Z21_FACTO_INFLUENCI_HEALTH_STATUS_CONTACT_W_HEALTH_SERVI	Z21	Factors influencing health status and contact with health services
0.0283115	0.00364468	7.76789	7.98033e-15	0.507671	99735	346736	1.02872	ACUTE_RESPIRATORY_INFECTIONS	COPD	Asthma/COPD-related acute respiratory infections
0.121007	0.0155924	7.76061	8.45215e-15	0.53877	3653	449186	1.12863	PSOR_ARTHR_OTH	RHEUMA	Other psoriatic arthropathies
0.0350476	0.00452413	7.74683	9.42165e-15	0.511086	103071	98965	1.03567	RX_ACETICDERIV	RX	Acetic acid derivatives and related substances
0.0639218	0.00825689	7.74163	9.81486e-15	0.509148	16749	378019	1.06601	I9_ANGIO	I9	Coronary angioplasty
0.118694	0.0153918	7.71149	1.24355e-14	0.537744	3756	449977	1.12602	M13_PSORIARTH_ICD10	M13	Psoriatic arthropathies, ICD10
0.0325894	0.00422663	7.71048	1.25345e-14	0.51051	78592	217833	1.03313	Z21_MEDICAL_OBSER_EVALU_SUSPECTED_DISEA_CONDI	Z21	Medical observation and evaluation for suspected diseases and conditions
0.0351751	0.00456858	7.69936	1.36753e-14	0.509581	55533	326530	1.0358	M13_SOFTTISSUEOTH	M13	Other soft tissue disorders, not elsewhere classified
0.0466494	0.00606451	7.6922	1.44629e-14	0.514884	27852	425881	1.04775	E4_OBESITY_HYPER	E4	Obesity and other hyperalimentation
0.134946	0.0175538	7.68757	1.49958e-14	0.540116	2908	450825	1.14447	K11_ORAL_LEUCOPLAC_RELAT_INCLAVO	K11	Oral leukoplakia and related diseases, including avohilmo
0.0465566	0.00607889	7.65873	1.87786e-14	0.514854	27711	425881	1.04766	E4_OBESITY	E4	Obesity
0.0263005	0.00343785	7.65028	2.00544e-14	0.507679	115852	337881	1.02665	J10_UPPERDIS	J10	Other diseases of upper respiratory tract
0.0281304	0.0036858	7.6321	2.30967e-14	0.508179	354768	98965	1.02853	RX_NSAID	RX	Anti-inflammatory and antirheumatic products, non-steroids
0.0417262	0.00549369	7.5953	3.07089e-14	0.511431	35960	403431	1.04261	AB1_GASTROENTERITIS_NOS	AB1	Diarrhoea and gastroenteritis of presumed infectious origin
0.0726339	0.00957678	7.58437	3.34103e-14	0.511878	12461	378019	1.07534	I9_CABG	I9	Coronary artery bypass grafting
0.0244517	0.0032242	7.58381	3.3556e-14	0.5061	144808	308925	1.02475	COPD_ASTHMA_INFECTIONS	COPD	COPD/asthma related infections
0.0244517	0.0032242	7.58381	3.3556e-14	0.5061	144808	308925	1.02475	PULM_INFECTIONS	ILD	COPD/asthma/ILD related infections
0.0495822	0.00653804	7.58365	3.35964e-14	0.511448	24825	399149	1.05083	AB1_ERYSIPELAS	AB1	Erysipelas
0.0291566	0.00385259	7.56807	3.78816e-14	0.508032	87268	366465	1.02959	J10_UPPERINFEC	J10	Acute upper respiratory infections
0.05996	0.00792693	7.56409	3.90588e-14	0.516334	17811	215354	1.06179	O15_PREG_DM	O15	Diabetes mellitus in pregnancy
0.109115	0.0144301	7.56162	3.98084e-14	0.531994	4474	435449	1.11529	DIALYSIS	DIAB	Dialysis
0.0721169	0.00954146	7.55827	4.08471e-14	0.518031	11265	436208	1.07478	N14_CHRONKIDNEYDIS	N14	Chronic kidney disease
0.139984	0.018532	7.55363	4.23278e-14	0.54261	2657	382065	1.15026	Z21_CARE_INVOLVI_DIALY	Z21	Care involving dialysis
0.0487564	0.00645807	7.54969	4.36292e-14	0.512475	27012	238922	1.04996	ASTHMA_NAS_EXMORE	ASTHMA	Asthma, unspecified (mode)
0.164397	0.0218027	7.54018	4.69328e-14	0.554865	1787	451946	1.17868	K11_ORAL_LICHEN_PLANUS_INCLAVO	K11	Oral lichen ruber planus, including avohilmo
0.0434529	0.00577493	7.52442	5.29563e-14	0.512075	35443	217833	1.04441	Z21_EXAM_OBSER_OTH_REASO	Z21	Examination and observation for other reasons
0.0725277	0.00964336	7.52099	5.43617e-14	0.521938	10895	288472	1.07522	K11_CARIES	K11	Dental caries
0.0859776	0.0114506	7.50857	5.97753e-14	0.524917	7143	437420	1.08978	L12_PSORI_VULG	L12	Psoriasis vulgaris
0.0315434	0.0042098	7.49285	6.73946e-14	0.508056	382510	71223	1.03205	RX_PARACETAMOL_NSAID	RX	Paracetamol of NSAID medication
0.0454292	0.00606793	7.48677	7.05904e-14	0.511983	27716	395832	1.04648	G6_CARPTU	G6	Carpal tunnel syndrome
0.260404	0.0347847	7.48615	7.09223e-14	0.584418	695	424573	1.29745	E4_VIT_B_DEF	E4	Deficiency of other B group vitamins
0.034503	0.0046161	7.4745	7.74962e-14	0.50547	82200	264612	1.03511	CARDIAC_ARRHYTM	COPD	Cardiac arrhythmias
0.202471	0.0270993	7.47146	7.93109e-14	0.570664	1131	452602	1.22442	SLE_ICD10	RHEUMA	SLE, ICD10
0.202471	0.0270993	7.47146	7.93109e-14	0.570664	1131	452602	1.22442	SLE_STRICT	RHEUMA	SLE, strict definition
0.0240412	0.00323966	7.4209	1.16326e-13	0.506639	141268	312465	1.02433	R18_SYMPTOMS_SIGNS_INVOLVI_DIGES_SYSTEM_ABDOMEN	R18	Symptoms and signs involving the digestive system and abdomen
0.0365949	0.00493228	7.41946	1.17599e-13	0.509875	53385	217833	1.03727	Z21_GENERAL_EXAM_INVES_PERSONS_WO_COMPLA_REPOR_DIAGNOSIS	Z21	General examination and investigation of persons without complaint and reported diagnosis
0.0467556	0.00633719	7.37797	1.60725e-13	0.513212	25653	326530	1.04787	M13_SYNOTEND	M13	Disorders of synovium and tendon
0.0473002	0.00641993	7.3677	1.73591e-13	0.512345	27012	248261	1.04844	ASTHMA_NAS	ASTHMA	Asthma, unspecified (mode)
0.0639053	0.00867417	7.36732	1.74098e-13	0.509752	15579	402635	1.06599	I9_HEARTFAIL_AND_CHD	CARDIO	Heart failure and coronary heart disease
0.0755899	0.0102906	7.3455	2.04987e-13	0.523131	9446	288472	1.07852	K11_CARIES_DENTIN	K11	Dentinal caries
0.108695	0.0148032	7.3427	2.09326e-13	0.531627	4232	449501	1.11482	NEPHROPATHY_OPER	DIAB	Nephropathy related operations
0.0772082	0.0105167	7.34146	2.11277e-13	0.52004	9046	429826	1.08027	M13_OSTEOPOROSIS	M13	Osteoporosis
0.0239868	0.00327751	7.31862	2.50526e-13	0.505064	138766	314967	1.02428	R18_SYMPTOMS_SIGNS_INVOLVI_CIRCULATO_RESPI_SYSTEMS	R18	Symptoms and signs involving the circulatory and respiratory systems
0.0592188	0.00810633	7.30525	2.76758e-13	0.512803	16035	403936	1.06101	AB1_SEPSIS_BACT_IMPL	AB1	Implicit bacterial Sepsis
0.0308951	0.00424552	7.27712	3.41028e-13	0.505861	69052	376677	1.03138	DIAB_MED_OTHER	RX	Other (not insulin) diabetes medications
0.031686	0.0043588	7.26944	3.60981e-13	0.50711	64301	314967	1.03219	R18_ABNORMALITI_BREAT	R18	Abnormalities of breathing
0.0564282	0.00776679	7.26531	3.72173e-13	0.513516	17525	436208	1.05805	N14_RENFAIL	N14	Renal failure
0.0387034	0.00533396	7.25602	3.98641e-13	0.509726	41837	238922	1.03946	J10_ASTHMA_MAIN_EXMORE	J10	Asthma (only as main-diagnosis)
0.0402129	0.00555429	7.23996	4.48812e-13	0.508449	36652	403936	1.04103	AB1_SEPSIS_IMPLICIT	AB1	Implicit Sepsis
0.051496	0.00711911	7.23348	4.70756e-13	0.516684	19661	426022	1.05284	E4_OBESITYCAL	E4	Obesity due to excess calories
0.0355648	0.00492789	7.21704	5.31301e-13	0.507412	48258	392548	1.0362	AB1_SEPSIS_CONDITION	AB1	Condition for Implicit Sepsis (Organ dysfunction codes)
0.0225451	0.00312542	7.21347	5.45437e-13	0.50681	165261	288472	1.0228	K11_ORAL	K11	Diseases of oral cavity, salivary glands and jaws
0.0287887	0.00402327	7.15554	8.33421e-13	0.507707	72282	381451	1.02921	RX_CODEINE_TRAMADOL	RX	Codeine or tramadol medication
0.0333663	0.00467628	7.13522	9.66293e-13	0.509643	50200	401484	1.03393	G6_SLEEPAPNO	G6	Sleep apnoea
0.0378255	0.00531044	7.12285	1.05718e-12	0.509596	41837	248261	1.03855	J10_ASTHMA_MAIN	J10	Asthma (only as main-diagnosis)
0.147759	0.020745	7.12265	1.05875e-12	0.545839	1996	439424	1.15923	M13_CONNECTNAS	M13	Other specified/unspecified systemic involvement of connective tissue
0.0315195	0.00442848	7.11746	1.09936e-12	0.509065	57251	391891	1.03202	SLEEP	NEURO	Sleep disorders (combined)
0.0877909	0.0123629	7.10115	1.23725e-12	0.522174	6266	447467	1.09176	J10_INTERSTITIUM	J10	Other respiratory diseases principally affecting the interstitium
-0.0598636	0.00844581	-7.08797	1.36095e-12	0.486041	17872	143624	0.941893	C3_MALE_GENITAL_EXALLC	C3	malignant neoplasm of male genital organs
0.0531587	0.00751758	7.07125	1.53541e-12	0.511502	18822	403936	1.0546	AB1_SEPSIS_BACT	AB1	Bacterial Sepsis
-0.114086	0.0161381	-7.06936	1.55646e-12	0.462013	3484	322314	0.892181	M13_ANKYLOSPON	M13	Ankylosing spondylitis
0.0300106	0.0042552	7.05269	1.75497e-12	0.51005	66601	365880	1.03047	Z21_PERSONS_ENCOUNTERI_HEALTH_SERVI_OTH_COUNSELLI_MEDICAL_ADVICE_NOT_ELSEW_CLASSIFIED	Z21	Persons encountering health services for other counselling and medical advice, not elsewhere classified
0.11487	0.016288	7.05245	1.758e-12	0.534729	3460	434113	1.12173	H7_VITRHAEMORR	H7	Vitreous haemorrhage
0.0587569	0.00833608	7.04851	1.80849e-12	0.515392	16063	238060	1.06052	O15_OTHER_MATERN_DIS_ELSEWHERE	O15	Other maternal diseases classifiable elsewhere but complicating pregnancy, childbirth and the puerperium
0.0352923	0.00501953	7.031	2.05063e-12	0.509885	44582	397583	1.03592	K11_CHOLELITH	K11	Cholelithiasis
0.0315061	0.00450573	6.99244	2.70145e-12	0.508996	54698	399035	1.03201	G6_SLEEPAPNO_INCLAVO	G6	Sleep apnoea, including avohilmo
0.0984077	0.0140766	6.99087	2.73188e-12	0.523673	4853	420324	1.10341	I9_PERIPH	I9	Peripheral artery operations in Hilmo
0.0262209	0.00375248	6.98761	2.79604e-12	0.506074	93340	360393	1.02657	K11_INTESTOTH	K11	Other diseases of intestines
0.0581053	0.00835735	6.9526	3.58608e-12	0.508466	15717	402147	1.05983	I9_UAP	I9	Unstable angina pectoris
0.183249	0.0263905	6.94374	3.8186e-12	0.562474	1198	439424	1.20111	M13_SLE	M13	Systemic lupus erythematosus
0.251253	0.0362135	6.93812	3.97365e-12	0.577276	667	364479	1.28564	T1D_WIDE2	DIAB	Type 1 diabetes, wide definition, subgroup 2
0.114303	0.0164855	6.93357	4.10365e-12	0.527957	3474	435897	1.12109	AMPUTATION	DIAB	Amputation
0.0307066	0.00443031	6.93103	4.17801e-12	0.50621	62768	314967	1.03118	R18_PAIN_THROAT_CHEST	R18	Pain in throat and chest
0.111273	0.0160966	6.91282	4.75112e-12	0.531942	3511	450222	1.1177	RX_L04AD	RX	L04AD Calcineurin inhibitors
0.0339896	0.00492044	6.90784	4.92073e-12	0.509354	46748	397583	1.03457	CHOLELITH_BROAD	K11	Cholelithiasis, broad definition with cholecystitis
-0.0594709	0.00861009	-6.90712	4.94578e-12	0.486255	17258	143624	0.942263	C3_PROSTATE_EXALLC	C3	Malignant neoplasm of prostate
0.161808	0.0234534	6.89911	5.23299e-12	0.549639	1617	424573	1.17563	E4_VIT_DEF	E4	Vitamin deficiency
0.161808	0.0234534	6.89911	5.23299e-12	0.549639	1617	424573	1.17563	VIT_DEF	E4	Vitamin deficiency
0.0429521	0.00623525	6.8886	5.63443e-12	0.510497	27242	401589	1.04389	ASTHMA_HOSPITAL_INFECTIONS	ASTHMA	Asthma, hospital admission 2, infections
0.0429521	0.00623525	6.8886	5.63443e-12	0.510497	27242	401589	1.04389	ASTHMA_INFECTIONS	ASTHMA	Asthma-related infections
0.0560465	0.00816885	6.861	6.83825e-12	0.513546	15522	384093	1.05765	E4_HYPERLIPNAS	E4	Hyperlipidaemia, other/unspecified
0.054563	0.00796295	6.85211	7.27677e-12	0.516215	15683	438050	1.05608	L12_URTICARIAERYTHEMA	L12	Urticaria and erythema
0.0562559	0.00821904	6.84458	7.66996e-12	0.514813	16558	238060	1.05787	O15_OBSTET_NAS	O15	Other obstetric conditions, not elsewhere classified
0.215945	0.0317501	6.8014	1.03606e-11	0.570671	828	287796	1.24103	M13_JUVERHEU	M13	Juvenile rheumatoid arthirtis
0.093103	0.0137469	6.77266	1.26437e-11	0.523406	4999	448734	1.09757	ILD_HOSPITAL	ILD	ILD, hospital admissions
0.249238	0.0370769	6.72219	1.79018e-11	0.584821	587	439424	1.28305	M13_OVERLAP	M13	Other overlap syndromes
0.0764698	0.0113862	6.71603	1.86744e-11	0.523668	7210	446523	1.07947	D3_IMMUNEMECHANISM	D3	Certain disorders involving the immune mechanism
0.194049	0.0289058	6.71317	1.90447e-11	0.567696	986	452535	1.21416	SLE_NOS	RHEUMA	Systemic lupus erythematosus, unspecified
0.0996063	0.0148698	6.69855	2.10503e-11	0.51746	5622	231952	1.10474	FG_OTH	I9	Other CVD (FINNGEN)
0.0836729	0.0125011	6.69325	2.18266e-11	0.526103	6059	288472	1.08727	K11_LIP_ORAL_MUCOSA	K11	Other diseases of lip and oral mucosa
0.162875	0.0244009	6.67494	2.47331e-11	0.5529	1422	452311	1.17689	RX_L04AC	RX	L04AC Interleukin inhibitors
0.107349	0.0160888	6.67227	2.5188e-11	0.528814	3556	450177	1.11332	N14_GLOMER_NEPHRITIS	N14	Glomerulonephritis
0.0287614	0.00431185	6.67033	2.55233e-11	0.505725	69297	384436	1.02918	Z21_PERSONS_W_POTEN_HEALTH_HAZARDS_RELATED_FAMILY_PERSONAL_HISTORY_CERTA_CONDI_INFLUENCI_HEALTH_STATUS	Z21	Persons with potential health hazards related to family and personal history and certain conditions influencing health status
0.0457639	0.00686131	6.66984	2.56081e-11	0.504251	36260	231952	1.04683	FG_CEREBVASC	I9	Cerebrovascular diseases (FINNGEN)
0.0907825	0.0136257	6.66259	2.69038e-11	0.522687	5097	447467	1.09503	J10_OTHERINSTPULM	J10	Other interstitial pulmonary diseases
0.0350387	0.00527184	6.64639	3.00359e-11	0.509153	39716	326530	1.03566	M13_LIMBPAIN	M13	Pain in limb
0.0905276	0.0136251	6.64418	3.0491e-11	0.522636	5097	448636	1.09475	ILD	ILD	Interstitial lung disease
0.0905276	0.0136251	6.64418	3.0491e-11	0.522636	5097	448636	1.09475	ILD_ENDPOINTS	ILD	Interstitial lung disease endpoints
0.042054	0.00633834	6.63486	3.24802e-11	0.511376	34930	98965	1.04295	RX_OXICAMS	RX	Oxicams
0.0494826	0.00753519	6.56687	5.13831e-11	0.508504	19982	384436	1.05073	Z21_PRESENCE_CARDIAC_VASCULAR_IMPLANTNTS_GRAFTS	Z21	Presence of cardiac and vascular implants and grafts
0.0472036	0.00720433	6.55211	5.67295e-11	0.512134	19980	401589	1.04834	ASTHMA_ACUTE_RESPIRATORY_INFECTIONS	ASTHMA	Asthma-related acute respiratory infections
0.0562253	0.00859962	6.53812	6.22988e-11	0.514998	13152	412885	1.05784	H7_LACRIGLAND	H7	Other disorders of lacrimal gland
0.0499224	0.00768291	6.49784	8.14798e-11	0.51274	16875	412885	1.05119	H7_LACRIMALSYSTEM	H7	Disorders of lacrimal system
0.0711776	0.0110835	6.42196	1.34527e-10	0.523431	8663	195394	1.07377	CPAP	COPD	Continuous positive airway pressure
0.0218789	0.00340862	6.41871	1.37436e-10	0.505829	114334	339399	1.02212	K11_PULP_PERIAPICAL_INCLAVO	K11	Diseases of pulp and periapical tissues, including avohilmo
0.0569724	0.00888606	6.41143	1.44162e-10	0.51623	12855	333607	1.05863	R18_OEDEMA_NOT_ELSEW_CLASSIFIED	R18	Oedema, not elsewhere classified
0.0242891	0.00379483	6.40059	1.54782e-10	0.508058	87853	365880	1.02459	Z21_PERSONS_ENCOUNTERI_HEALTH_SERVI_OTH_CIRCUMSTANC1	Z21	Persons encountering health services in other circumstances
0.0768257	0.0120133	6.39503	1.60518e-10	0.525865	6414	440301	1.07985	K11_DISLIVOTH	K11	Other diseases of liver
0.308637	0.0482804	6.39259	1.63098e-10	0.607468	339	423041	1.36157	L12_VITILIGO	L12	Vitiligo
-0.106398	0.0166521	-6.3895	1.66426e-10	0.465003	3256	450477	0.899066	M13_ANKYLOSPON_ICD10	M13	Ankylosing spondylitis, ICD10
0.0562398	0.00883736	6.36387	1.96734e-10	0.517353	12576	438050	1.05785	L12_URTICARIA	L12	Urticaria
0.259167	0.0407323	6.3627	1.98237e-10	0.585367	486	439424	1.29585	M13_WEGENER	M13	Wegener granulomatosis
0.15652	0.0246515	6.34934	2.16238e-10	0.548852	1450	434894	1.16943	E4_ADRENAL	E4	Other disorders of adrenal gland
0.0926039	0.0146237	6.33246	2.41283e-10	0.523285	4380	449353	1.09703	ILD_HOSPITAL_MAIN	ILD	ILD, hospital admissions 1, main diag only
0.0394742	0.00624254	6.32341	2.55845e-10	0.511721	26746	426987	1.04026	L12_INFECT_SKIN	L12	Infections of the skin and subcutaneous tissue
0.0432739	0.00684488	6.32209	2.5805e-10	0.512052	22704	399149	1.04422	AB1_BACTINF_NOS	AB1	Bacterial infection, other or unspecified
0.0879727	0.01393	6.31536	2.69536e-10	0.52393	5058	238922	1.09196	ASTHMA_NOS_EXMORE	ASTHMA	Undetermined asthma
0.125364	0.0198693	6.30942	2.80091e-10	0.536195	2238	440301	1.13356	K11_OTHINFLIV	K11	Other inflammatory liver diseases
0.0214853	0.0034132	6.29479	3.0782e-10	0.505765	113877	339856	1.02172	K11_PULPITIS_4	K11	Dental pulpitis 4
0.0214907	0.00341415	6.29461	3.08183e-10	0.505764	113775	339958	1.02172	K11_PULPITIS_1	K11	Dental pulpitis 1
0.0316236	0.00502406	6.29443	3.08536e-10	0.507573	43508	410225	1.03213	J10_ASTHMA_OTHER_THAN_NONALLERGIC	J10	Asthma (diagnoses ohter than nonallergic)
0.0472721	0.00753605	6.27279	3.54625e-10	0.511721	18428	435305	1.04841	D3_APLASTICANDOTHANAEMIA	D3	Aplastic and other anaemias
0.0270457	0.00431504	6.26777	3.66259e-10	0.505712	69803	308925	1.02741	COPD_ASTHMA_PNEUMONIA_SEPSIS	COPD	COPD/asthma related pneumonia or pneumonia derived septicaemia
0.0270457	0.00431504	6.26777	3.66259e-10	0.505712	69803	308925	1.02741	PULM_PNEUMONIA_SEPSIS	ILD	COPD/asthma/ILD related pneumonia or pneumonia derived septicaemia
0.0295418	0.004726	6.25091	4.08069e-10	0.502733	79470	374263	1.02998	H7_LENS	H7	Disorders of lens
0.0678646	0.0108578	6.25032	4.09616e-10	0.519711	8185	234147	1.07022	O15_PREECLAMPS	O15	Pre-eclampsia
0.0458627	0.00737823	6.21595	5.10146e-10	0.513714	18839	434894	1.04693	E4_ENDOGLAND	E4	Disorders of other endocrine glands
0.0862006	0.013893	6.2046	5.48349e-10	0.523799	5058	248261	1.09002	ASTHMA_NOS	ASTHMA	Undetermined asthma
0.0504763	0.00814065	6.20053	5.62747e-10	0.516691	15235	288472	1.05177	K11_PULP_PERIAPICAL	K11	Diseases of pulp and periapical tissues
0.0406994	0.00656422	6.20019	5.63956e-10	0.510841	23907	429826	1.04154	M13_OSTEOCHONDRO	M13	Osteopathies and chondropathies
0.137723	0.0222293	6.19559	5.80671e-10	0.542133	1778	451955	1.14766	K11_ORAL_LEUCOPLAC_RELAT	K11	Oral leukoplakia and related diseases
0.0512927	0.00830304	6.17758	6.50913e-10	0.511601	14763	401589	1.05263	ASTHMA_PNEUMONIA	ASTHMA	Asthma-related pneumonia
0.0411372	0.00667136	6.16624	6.99342e-10	0.510762	34160	98965	1.042	RX_NSAID_OTHER	RX	Oter anti-inflammatory and antirheumatic agents, non-steroids
0.0510475	0.00829428	6.15454	7.52956e-10	0.511543	14798	401589	1.05237	ASTHMA_HOSPITAL_PNEUMONIA	ASTHMA	Asthma, hospital admissions 3, pneumonia
0.0510475	0.00829428	6.15454	7.52956e-10	0.511543	14798	401589	1.05237	ASTHMA_PNEUMONIA_AND_SEPSIS	ASTHMA	Asthma-related pneumonia or sepsis
0.132782	0.0216109	6.1442	8.03679e-10	0.539242	1906	450441	1.142	Z21_EXTRACO_DIALY	CARDIO	Extracorporeal dialysis
0.0377298	0.00614333	6.1416	8.16968e-10	0.509638	27587	394476	1.03845	L12_DERMATITISNAS	L12	Other and unspecified dermatitis
0.0643587	0.0104804	6.14088	8.20663e-10	0.518736	8818	234034	1.06647	O15_PRE_OR_ECLAMPSIA	O15	Pre-eclampsia or eclampsia
0.0208504	0.00340916	6.11599	9.59607e-10	0.505686	122162	312465	1.02107	R18_ABDOMI_PELVIC_PAIN	R18	Abdominal and pelvic pain
0.0676862	0.0110767	6.11069	9.91991e-10	0.52135	7778	438050	1.07003	L12_URTICA_NAS	L12	Other and unspecified urticaria
0.2401	0.0394305	6.08921	1.13472e-09	0.574326	537	328079	1.27138	CHARCOT	DIAB	Charcot foot
-0.0777807	0.0127841	-6.08418	1.17091e-09	0.474419	5703	341375	0.925167	SPONDYLOPATHY_FG	RHEUMA	Spondylopathies (FG)
0.018692	0.00307866	6.07147	1.26741e-09	0.505666	184409	269324	1.01887	GASTRO_OPERATIONS	GASTRO	GASTRO-related operations
0.018692	0.00307866	6.07147	1.26741e-09	0.505666	184409	269324	1.01887	GAST_OPER	K11	Any gastric operation
0.185841	0.0306464	6.06404	1.32746e-09	0.558657	910	451432	1.20423	Z21_OTHER_DIALY	CARDIO	Other dialysis
0.059199	0.00976449	6.06268	1.33872e-09	0.516518	10124	443609	1.06099	AB1_MYCOSES	AB1	Mycoses
0.117756	0.0194271	6.06141	1.34935e-09	0.53456	2338	440301	1.12497	K11_FIBROCHIRLIV	K11	Fibrosis and cirrhosis of liver
0.042503	0.0070187	6.05568	1.39822e-09	0.506914	22199	411682	1.04342	I9_TIA	I9	Transient ischemic attack
0.242938	0.0402594	6.03431	1.59639e-09	0.583947	487	448835	1.27499	RX_L04AB05	RX	Certolizumab pegol
0.0678171	0.0112445	6.03112	1.62825e-09	0.518846	7563	337881	1.07017	J10_NASALPOLYP	J10	Nasal polyp
0.0824977	0.0136924	6.02508	1.69022e-09	0.525135	4854	446523	1.086	D3_SARCOIDOSIS	D3	Sarcoidosis
0.0376992	0.00626177	6.02053	1.73845e-09	0.504681	33250	394758	1.03842	I9_HEARTFAIL_EXMORE	I9	Heart failure, strict
0.0586252	0.00973915	6.01954	1.74917e-09	0.516681	10239	443494	1.06038	ILD_FOR_EXCL	ILD	Diagnoses used for exclusion with ILD
0.0238937	0.00398214	6.0002	1.97071e-09	0.505015	90094	287796	1.02418	M13_ARTHROSIS	M13	Arthrosis
0.0491032	0.00819293	5.99336	2.05543e-09	0.50853	15905	437828	1.05033	I9_NSTEMI	I9	Myocardial infarction, without ST-elevation
0.0697491	0.0116549	5.98454	2.16997e-09	0.5211	7102	240864	1.07224	TEMPOROMANDIB	K11	Temporomandibular joint disorders
0.165767	0.0277141	5.98132	2.21337e-09	0.55263	1116	434894	1.1803	E4_ADDISON	E4	Adrenocortical insufficiency
0.0271919	0.00457304	5.94612	2.74573e-09	0.507879	63608	236510	1.02756	F5_DEPRESSION_DYSTHYMIA	F5	Depression or dysthymia
-0.0549838	0.00925097	-5.94357	2.78874e-09	0.486895	12081	201226	0.9465	C3_BREAST_ERPLUS_EXALLC	C3	Malignant neoplasm of breast, HER-positive
0.0457583	0.00771611	5.93023	3.0251e-09	0.512877	17111	433007	1.04682	D3_ANAEMIA_IRONDEF	D3	Iron deficiency anaemia
0.0463729	0.00782842	5.92366	3.14857e-09	0.511777	16985	435305	1.04746	D3_OTHERANAEMIA	D3	Other anaemias
0.0465994	0.00786807	5.92259	3.16903e-09	0.511859	16799	435305	1.0477	D3_ANAEMIANAS	D3	Other and unspecified anaemias
0.0247023	0.00417413	5.91796	3.25961e-09	0.506527	69104	384629	1.02501	BRONCHITIS	ASTHMA	Bronchitis
0.0300726	0.00508258	5.9168	3.28273e-09	0.506061	44590	409143	1.03053	K11_CONSTIPATION	K11	Constipation
0.0373859	0.00632504	5.91078	3.40496e-09	0.510142	27211	333607	1.03809	R18_FEVER_OTHER_UNKNO_ORIGIN	R18	Fever of other and unknown origin
0.0446578	0.00756496	5.90325	3.56411e-09	0.510652	18182	403936	1.04567	AB1_SEPSIS_EXPLICIT	AB1	Explicit Sepsis
0.0460611	0.00780528	5.90128	3.60703e-09	0.5108	17111	399149	1.04714	AB1_SEPSIS	AB1	Septicaemia
0.0429646	0.00728383	5.89862	3.66547e-09	0.512193	433177	20556	1.0439	ANY_OPER	SHARED	Any operation in hilmo
0.041114	0.00697017	5.89857	3.66676e-09	0.506832	22199	420369	1.04197	G6_TIA	G6	Transient ischemic attack
-0.140248	0.0237866	-5.89609	3.7221e-09	0.452956	1521	450477	0.869143	M13_ANKYLOSPON_STRICT	M13	Ankylosing spondylitis, strict definition
0.018141	0.00307705	5.89557	3.73397e-09	0.505129	178816	265984	1.01831	VWXY20_OTHER_EXTER_CAUSES_ACCIDENTAL_INJURY	VWXY20	Other external causes of accidental injury
0.048625	0.00825531	5.89015	3.85847e-09	0.511393	15156	399149	1.04983	AB1_OTHER_SEPSIS	AB1	Other septicaemia
0.164256	0.0278919	5.88902	3.88495e-09	0.55509	1073	448835	1.17852	RX_L04AB06	RX	Golimumab
-0.0433535	0.00736425	-5.88702	3.93226e-09	0.490309	20586	201494	0.957573	C3_BREAST_EXALLC	C3	Malignant neoplasm of breast
0.0244842	0.0041728	5.86757	4.42221e-09	0.505198	67440	386293	1.02479	J10_ASTHMA_INCLAVO	J10	Asthma, including avohilmo
0.0175361	0.00299044	5.86407	4.51649e-09	0.504502	233752	219981	1.01769	VWXY20_EXTER_CAUSES_MORBIDI_MORTA	VWXY20	External causes of morbidity and mortality
0.0222047	0.00379295	5.8542	4.79304e-09	0.503189	111043	342690	1.02245	I9_OTHHEART	I9	Other heart diseases
0.0177357	0.0030314	5.85066	4.89628e-09	0.505012	187749	265984	1.01789	VWXY20_ACCIDENTS	VWXY20	Accidents
-0.0431067	0.00736984	-5.84907	4.94329e-09	0.49036	20550	201493	0.957809	C3_BREAST_HER2NEG_EXALLC	C3	Malignant neoplasm of breast, HER2-negative
0.0529137	0.00905418	5.84412	5.09266e-09	0.515951	12377	288472	1.05434	K11_DENTOFACIAL_ANOMALIES	K11	Dentofacial anomalies [including malocclusion]
0.0381976	0.00653938	5.84117	5.18363e-09	0.511493	24080	337881	1.03894	J10_VOCALLARYNX	J10	Diseases of vocal cords and larynx+other diseases of upper respiratory tract, no elsewhere classified
0.283638	0.0489579	5.79352	6.89278e-09	0.596556	322	385630	1.32795	E4_HYTHYSUBS	E4	Hypothyroidism due to medicaments and other exogenous substances
0.0550345	0.00952102	5.78031	7.45619e-09	0.5159	11324	312465	1.05658	R18_NAUSEA_VOMITI	R18	Nausea and vomiting
0.0269586	0.00466617	5.77745	7.584e-09	0.505204	52013	372627	1.02733	J10_ASTHMACOPDKELA	J10	Asthma/COPD (KELA code 203)
0.100934	0.0174715	5.77708	7.60102e-09	0.532048	2958	432380	1.1062	COLITCOLLAG	GASTRO	Collagenous colitis
0.133534	0.0231221	5.77516	7.68795e-09	0.538903	1650	447568	1.14286	Z21_KIDNEY_TRANSPLANT_STATUS	DIAB	Kidney transplant status
0.032132	0.00556946	5.76931	7.95944e-09	0.504153	50736	231952	1.03265	FG_DISVEINLYMPH	CARDIO	Diseases of veins, lymphatic vessels and lymph nodes, not elsewhere classified (FINNGEN)
0.0264936	0.00459252	5.76886	7.98073e-09	0.50513	56048	397685	1.02685	R18_SYMPTOMS_SIGNS_INVOLVI_COGNITION_PERCEP_EMOTIONAL_STATE_BEHVI	R18	Symptoms and signs involving cognition, perception, emotional state and behaviour
0.0364745	0.00632591	5.7659	8.12239e-09	0.502336	55853	231952	1.03715	I9_AF	I9	Atrial fibrillation and flutter
0.0494331	0.00857709	5.76339	8.24388e-09	0.51408	13159	401589	1.05068	ASTHMA_OBESITY	ASTHMA	Obesity related asthma
0.0285389	0.00495273	5.76225	8.30022e-09	0.506642	47199	406534	1.02895	N14_RENALTUB	N14	Renal tubulo-interstitial diseases
-0.0464057	0.00807137	-5.74942	8.95521e-09	0.487629	17872	181243	0.954655	C3_MALE_GENITAL	C3	malignant neoplasm of male genital organs
0.0625301	0.0109146	5.72904	1.01002e-08	0.518176	8266	249420	1.06453	COPD_EARLY_EXMORE	COPD	Early onset COPD
0.0242095	0.00422693	5.72743	1.01962e-08	0.504599	70150	383583	1.0245	J10_PNEUMONIA	J10	All pneumoniae
0.0592363	0.0103727	5.71078	1.12458e-08	0.514256	9801	403431	1.06103	AB1_VIRAL_OTHER_INTEST_INFECTIONS	AB1	Viral and other specified intestinal infections
0.0709	0.0124855	5.67858	1.35816e-08	0.518148	6271	384093	1.07347	E4_HYPOOSMNAT	E4	Hypo-osmolality and hyponatraemia
0.0426522	0.00751406	5.67632	1.37625e-08	0.51147	18345	236273	1.04357	O15_HYPTENSPREG	O15	Pregnancy hypertension
0.0381886	0.00674382	5.66275	1.48962e-08	0.510447	22495	394476	1.03893	L12_DERM_NAS	L12	Other and unspecified dermatitis
-0.0498931	0.00881509	-5.65997	1.514e-08	0.483595	13737	438369	0.951331	L12_ACTINKERA	L12	Actinic keratosis
0.322748	0.057067	5.65559	1.55312e-08	0.623014	230	338286	1.38092	AUTOHEP	K11	Autoimmune hepatitis
0.0422238	0.00747661	5.64746	1.6284e-08	0.510622	18508	428311	1.04313	J10_BRONCHITIS	J10	Acute bronchitis
0.0734314	0.0130086	5.64483	1.65345e-08	0.523159	5385	326530	1.07619	M13_TRIGGERFINGER	M13	Trigger finger
0.0402816	0.00714922	5.6344	1.7567e-08	0.510582	20471	234147	1.0411	O15_OEDEM_PROTUR_HYPERT	O15	Oedema, proteinuria and hypertensive disorders in pregnancy, childbirth and the puerperium
0.0799362	0.0142103	5.62524	1.85249e-08	0.521531	4705	423041	1.08322	L12_ULCERLOWLIMB	L12	Ulcer of lower limb, not elsewhere classified
-0.0479078	0.00852869	-5.61725	1.9402e-08	0.487714	14164	340376	0.953222	CD2_INSITU_EXALLC	CD2	In situ neoplasms
0.0238079	0.00424196	5.61248	1.99447e-08	0.504488	69549	383818	1.02409	PNEUMONIA	COPD	Pneumonias (Asthma/COPD co-morbidities)
0.0218046	0.00388598	5.61111	2.01032e-08	0.50423	81106	372627	1.02204	J10_LOWCHRON	J10	Chronic lower respiratory diseases
0.061595	0.0110219	5.58841	2.29153e-08	0.514953	8505	238922	1.06353	NONALLERG_ASTHMA_EXMORE	ASTHMA	Non-allergic asthma (mode)
0.0234581	0.00420388	5.58011	2.40368e-08	0.50395	71728	369007	1.02374	T2D	DIAB	Type 2 diabetes, definitions combined
0.0402123	0.00721345	5.57463	2.4806e-08	0.509365	20342	360393	1.04103	K11_OTHFUNC	K11	Other functional intestinal disorders
0.0278032	0.00498868	5.57325	2.50026e-08	0.506187	44736	407792	1.02819	R18_DYSPNOEA	R18	Dyspnoea
0.0361676	0.00649158	5.57147	2.52601e-08	0.508808	25422	428311	1.03683	J10_LOWERINF	J10	Other acute lower respiratory infections
0.22257	0.0400862	5.55228	2.81967e-08	0.567989	530	450646	1.24928	E4_HYPODRUG	E4	Drug-induced hypoglycaemia without coma
0.0233187	0.00420418	5.54654	2.91371e-08	0.503922	71629	370152	1.02359	E4_DM2_STRICT	E4	Type 2 diabetes, strict (exclude DM1)
-0.048065	0.00866658	-5.54602	2.92243e-08	0.483912	14203	438369	0.953072	L12_NONIONRADISKIN	L12	Skin changes due to chronic exposure to nonionizing radiation
-0.0455289	0.00821564	-5.54173	2.99493e-08	0.487902	17258	181857	0.955492	C3_PROSTATE	C3	Malignant neoplasm of prostate
0.0979584	0.017737	5.52282	3.33598e-08	0.52323	3089	231952	1.10292	I9_HYPTENSEC	I9	Secondary hypertension
0.0191126	0.00348215	5.48874	4.04811e-08	0.504929	107328	346405	1.0193	K11_PULPITIS_4_ONLYAVO	K11	Dental pulpitis 4, only avohilmo
0.0406165	0.00741766	5.47565	4.35918e-08	0.506295	22118	374263	1.04145	H7_CATARACTOTHER	H7	Other cataract
0.473303	0.0865008	5.47166	4.45839e-08	0.644708	109	364434	1.60529	T1D_STRICT2	DIAB	Type 1 diabetes, strict definition, subgroup 2
0.01982	0.00362381	5.46939	4.51587e-08	0.504747	101835	351898	1.02002	H8_EAR_MASTOID	H8	Diseases of the ear and mastoid process
0.204826	0.0375079	5.46089	4.73753e-08	0.566585	585	451899	1.22731	L12_DERMATHERP	L12	Dermatitis herpetiformis
0.0278712	0.00511451	5.44943	5.05326e-08	0.506456	41822	411911	1.02826	ASTHMA_HOSPITAL_MAIN	ASTHMA	Asthma, hospital admissions , main diagnosis only
0.143072	0.0262632	5.44764	5.10413e-08	0.543019	1266	436208	1.15381	N14_DIALYSIS	N14	Dialysis
0.0190002	0.00349148	5.44188	5.27207e-08	0.504855	106479	347254	1.01918	K11_PULPITIS_1_ONLYAVO	K11	Dental pulpitis 1, only avohilmo
0.022471	0.00413122	5.43931	5.34863e-08	0.504979	71668	382065	1.02273	Z21_PERSONS_ENCOUNTERI_HEALTH_SERVI_SPECIFIC_PROCED_HEALTH_CARE	Z21	Persons encountering health services for specific procedures and health care
0.0597624	0.0109884	5.43868	5.36767e-08	0.514824	8505	248261	1.06158	NONALLERG_ASTHMA	ASTHMA	Non-allergic asthma (mode)
-0.0499466	0.00919685	-5.43084	5.60894e-08	0.484085	11446	442287	0.95128	E4_NONTOXIC_THYROID	E4	Nontoxic goitre/thyroid nodule
0.0232772	0.00429476	5.41991	5.96306e-08	0.504203	67657	386076	1.02355	J10_PNEUMOPROBBAC	J10	Pneumonia (excl. viral and due to other infectious organisms not elsewhere classified)
0.150984	0.0278786	5.41577	6.10252e-08	0.5484	1092	434894	1.16298	E4_HYPOPARA	E4	Hypoparathyroidism
0.106119	0.0196036	5.41324	6.1895e-08	0.523846	2401	448636	1.11195	IPF	ILD	Idiopathic pulmonary fibrosis
0.0447305	0.00830919	5.38326	7.31493e-08	0.513752	14035	426022	1.04575	E4_OBESITYNAS	E4	Obesity, other/unspecified
0.0316969	0.00589597	5.37602	7.61493e-08	0.505168	30679	382065	1.0322	Z21_CARE_INVOLVI_USE_REHAB_PROCED	Z21	Care involving use of rehabilitation procedures
0.0305073	0.00568519	5.3661	8.04556e-08	0.507519	34001	333607	1.03098	R18_HEADACHE1	R18	Headache
0.170097	0.031713	5.36363	8.15677e-08	0.557289	837	326530	1.18542	M13_MYOSITIS	M13	Myositis
0.090129	0.016805	5.36322	8.17528e-08	0.525247	3267	384436	1.09432	Z21_TRANSPLANTED_ORGAN_TISSUE_STATUS	COPD	Transplanted organ and tissue status
0.0263457	0.00491234	5.36317	8.17756e-08	0.504202	46205	322314	1.0267	M13_INTERVERTEB	M13	Other intervertebral disc disorders
0.0475407	0.00886942	5.36007	8.31888e-08	0.513961	12795	241823	1.04869	O15_PREEC_OR_FETGRO	O15	Pre-eclampsia or poor fetal growth
0.0471804	0.00880991	5.35538	8.53771e-08	0.513647	12886	433007	1.04831	D3_ANAEMIA_IRONDEF_NAS	D3	Other and unspecified iron deficiency
0.0187316	0.00349911	5.35325	8.63876e-08	0.505878	118404	288472	1.01891	K11_GINGIVITIS_PERIODONTAL	K11	Gingivitis and periodontal diseases
0.0218093	0.00409989	5.31948	1.04064e-07	0.504081	75441	378292	1.02205	J10_INFLUPNEU	J10	Influenza and pneumonia
0.2353	0.0442733	5.3147	1.06831e-07	0.579552	403	453330	1.26529	RESP_ILL_DIS_CLASS_ELSEWHERE	ILD	Respiratory disorders in diseases classified elsewhere
0.0521073	0.00981158	5.3108	1.09145e-07	0.512112	10888	287796	1.05349	M13_GOUT	M13	Gout
-0.0170023	0.00320881	-5.29863	1.16672e-07	0.49582	197259	256474	0.983141	CD2_NEOPLASM	CD2	Neoplasms
0.0250711	0.00473292	5.29718	1.17606e-07	0.504793	54570	341375	1.02539	KNEE_ARTHROSIS	RHEUMA	Gonarthrosis [arthrosis of knee](FG)
0.0398427	0.00752374	5.29559	1.18634e-07	0.512078	17820	435913	1.04065	TEMPOROMANDIB_INCLAVO	K11	Temporomandibular joint disorders, including avohilmo
0.104993	0.019841	5.29174	1.21156e-07	0.528579	2681	51410	1.1107	DM2_NEUROPATHY	E4	Type 2 diabetes with neuropathy
0.234537	0.0443219	5.29169	1.21194e-07	0.577346	408	453325	1.26432	CHRONHEP_NAS	GASTRO	Chronic hepatitis NAS
0.353965	0.0671142	5.27406	1.33435e-07	0.620161	166	451441	1.4247	M13_MICROPOLYANG	M13	Microscopic polyangiitis
0.0675057	0.0128515	5.25276	1.49836e-07	0.51704	6203	166614	1.06984	VOCALCORDDYS	ASTHMA	Vocal cord dysfunction
0.0160216	0.00305204	5.24946	1.52545e-07	0.504262	231129	222604	1.01615	K11_PULPITIS_2	K11	Dental pulpitis 2
0.178285	0.034041	5.23736	1.62889e-07	0.563321	697	453036	1.19517	K11_ORAL_LICHEN_PLANUS	K11	Oral lichen ruber planus
0.0388362	0.00743027	5.22675	1.72513e-07	0.50563	19249	378292	1.0396	J10_PNEUMOBACT	J10	Bacterial pneumoniae
0.163602	0.031381	5.21341	1.85403e-07	0.552736	860	451899	1.17775	L12_BULLOTH	L12	Other bullous disorders
0.162548	0.0311857	5.21227	1.86543e-07	0.555552	862	432686	1.17651	L12_ALOPECAREATA	L12	Alopecia areata
0.0159541	0.00306253	5.20946	1.89395e-07	0.504337	210653	243080	1.01608	K11_CARIES_INCLAVO	K11	Dental caries, including avohilmo
0.0260199	0.00499598	5.20817	1.90716e-07	0.507262	46442	366465	1.02636	J10_ACUTEUPPERINFEC	J10	Acute upper respiratory infections of multiple and unspecified sites
0.0396385	0.00764252	5.18657	2.14198e-07	0.505641	18141	378292	1.04043	J10_PNEUMOBACTEROTH	J10	Bacterial pneumonia, not elsewhere classified
0.0345876	0.00667079	5.18493	2.16102e-07	0.510499	23899	341884	1.03519	G6_MIGRAINE	G6	Migraine
0.0256764	0.00496146	5.17516	2.27716e-07	0.501764	73410	374263	1.02601	H7_CATARACTSENILE	H7	Senile cataract
0.21197	0.0410187	5.16764	2.37069e-07	0.571987	478	439424	1.23611	M13_DERMATOPOLY	M13	Dermatopolymyositis
0.0262359	0.0050901	5.1543	2.54576e-07	0.505483	42342	326530	1.02658	M13_SHOULDER	M13	Shoulder lesions
0.015736	0.00306277	5.13783	2.77935e-07	0.504288	210457	243276	1.01586	K11_CARIES_1	K11	Dental caries 1
-0.030067	0.00585254	-5.13742	2.78535e-07	0.493782	37952	175325	0.970381	CD2_BENIGN_LEIOMYOMA_UTERI_EXALLC	CD2	Leiomyoma of uterus
0.0317046	0.00617413	5.13508	2.82028e-07	0.503768	32733	419755	1.03221	I9_HEARTFAIL_ALLCAUSE	I9	All-cause Heart Failure
0.0313959	0.00612592	5.12509	2.97395e-07	0.503824	33250	420483	1.03189	I9_HEARTFAIL	I9	Heart failure, strict
0.134529	0.0262612	5.12272	3.01163e-07	0.538589	1279	452454	1.144	GENERALI_SKIN_ERUPT_DRUGS_MEDICAM	L12	Generalized skin eruption due to drugs and medicaments
0.0494579	0.00965531	5.12235	3.01754e-07	0.511833	10888	414531	1.0507	GOUT	RHEUMA	Gout, FINNGEN
0.0289987	0.00566958	5.1148	3.14078e-07	0.508585	32536	421197	1.02942	K11_CHOLECYSTECTOMY	K11	Cholecystectomy
0.415495	0.0812743	5.11226	3.18322e-07	0.645687	111	410029	1.51512	RHEUMAT_LUNG	ILD	Rheumatoid lung disease
0.101757	0.0200024	5.08723	3.63326e-07	0.525733	2291	450259	1.10711	AMPUTATION_TOE	DIAB	Amputation of toe
0.0512597	0.0100835	5.08352	3.70509e-07	0.510051	11023	419198	1.0526	H7_AMD	H7	Age-related macular degeneration (whether dry or wet)
0.0349591	0.00688939	5.07433	3.88862e-07	0.50913	21584	432149	1.03558	H7_VISUALDISTBLIND	H7	Visual disturbances and blindness
0.076848	0.0151516	5.07193	3.93803e-07	0.521357	4271	166614	1.07988	SMOKING	MISC	Smoking
0.0541767	0.0106927	5.06668	4.04813e-07	0.516004	8508	288472	1.05567	K11_DISORD_TEETH	K11	Other disorders of teeth and supporting structures
0.164044	0.0323775	5.0666	4.04985e-07	0.552395	768	341375	1.17827	SYSTSCLE_FG	RHEUMA	Systemic sclerosis (FG)
0.0766943	0.0151401	5.06565	4.07015e-07	0.521947	4067	384093	1.07971	E4_HYPOKALAEMIA	E4	Hypokalaemia
0.270022	0.0533207	5.0641	4.10328e-07	0.599875	265	452535	1.30999	SLE_OTH	RHEUMA	Other forms of systemic lupus erythematosus
0.0154682	0.00306358	5.04905	4.44006e-07	0.504265	196945	256788	1.01559	K11_CARIES_3	K11	Dental caries 3
0.0207637	0.00411332	5.04792	4.46641e-07	0.503296	75943	365838	1.02098	T2D_INCLAVO	DIAB	Type 2 diabetes, definitions combined, including avohilmo
-0.0419695	0.00832264	-5.0428	4.58758e-07	0.485514	15364	438369	0.958899	L12_RADIATIONRELATEDSKIN	L12	Radiation-related disorders of the skin and subcutaneous tissue
0.0914706	0.0181552	5.03825	4.69803e-07	0.528414	2799	434925	1.09578	R18_ELEVATED_BLOOD_GLUCOSE_LEVEL	R18	Elevated blood glucose level
0.055542	0.0110655	5.01941	5.18315e-07	0.51583	7868	445865	1.05711	G6_POLYNEU	G6	Polyneuropathies and other disorders of the peripheral nervous system
0.0276663	0.00551319	5.0182	5.21587e-07	0.505796	37886	360393	1.02805	K11_DIVERTIC	K11	Diverticular disease of intestine
0.0383746	0.00764908	5.01689	5.25134e-07	0.502998	32849	231952	1.03912	I9_AF_REIMB	I9	Atrial fibrillation and flutter with reimbursement
0.0497299	0.00994718	4.9994	5.75094e-07	0.514473	9990	432380	1.05099	K11_OTHENTERCOL	K11	Other noninfective gastroenteritis and colitis
0.130399	0.0260872	4.99857	5.77583e-07	0.543743	1264	451079	1.13928	Z21_PREPAR_CARE_DIALY	CARDIO	Preparatory care for dialysis
0.0181133	0.00362621	4.99511	5.88022e-07	0.503113	99107	322314	1.01828	M13_DORSOPATHYOTH	M13	Other dorsopathies, not elsewhere classified
0.0601294	0.012045	4.99204	5.97443e-07	0.51394	7589	298486	1.06197	DRY_AMD	H7	Dry age-related macular degeneration (includes geographic atrophy)
0.0151997	0.00304874	4.98558	6.17755e-07	0.503838	271832	181901	1.01532	ST19_INJURY_POISO_CERTA_OTHER_CONSE_EXTER_CAUSES	ST19	Injury, poisoning and certain other consequences of external causes
0.0682434	0.013715	4.97583	6.4968e-07	0.520085	4828	444826	1.07063	ETMOIDECTOMY	ASTHMA	Ethmoidectomy
0.0468204	0.00944285	4.95829	7.1115e-07	0.512834	10851	385082	1.04793	K11_FUNCDYSP	K11	Functional dyspepsia
0.0693588	0.0140146	4.94905	7.45761e-07	0.51955	4789	446531	1.07182	D3_PURPURA_AND3_OTHER_HAEMORRHAGIC	D3	Purpura and other haemorrhagic conditions
0.0223671	0.00452996	4.93759	7.9093e-07	0.504248	60007	378292	1.02262	J10_PNEUMONAS	J10	Pneumonia, organism unspecified
0.0856241	0.0173483	4.93559	7.99084e-07	0.520726	3202	308925	1.0894	ILD_HOSPITAL_PULM_INFECT	ILD	ILD, hospital admission 2, with pulmonary infections
0.0356858	0.00723048	4.93547	7.99593e-07	0.505029	19975	424017	1.03633	PNEUMOBACTKNOWN	ASTHMA	Bacterial pneumonia (organism specified)
0.0479856	0.00973763	4.92785	8.31406e-07	0.514085	10296	426987	1.04916	L12_ABSCESS_CUT	L12	Cutaneous abscess, furuncle and carbuncle
0.0288714	0.00585955	4.92724	8.3398e-07	0.505982	33543	249893	1.02929	ST19_INTRACRATRAUMA	ST19	Intracranial trauma
-0.0447392	0.00909333	-4.92	8.65429e-07	0.488245	12081	242015	0.956247	C3_BREAST_ERPLUS	C3	Malignant neoplasm of breast, HER-positive
0.0149984	0.00305493	4.90956	9.12787e-07	0.503908	227744	225989	1.01511	K11_PULPITIS_2_ONLYAVO	K11	Dental pulpitis 2, only avohilmo
0.0311186	0.00634337	4.90569	9.30987e-07	0.505784	25696	428037	1.03161	R18_SYMPTOMS_SIGNS_INVOLVI_NERVOUS_MUSCULOS_SYSTEMS	R18	Symptoms and signs involving the nervous and musculoskeletal systems
0.0604458	0.0123233	4.905	9.34279e-07	0.518023	6344	333607	1.06231	R18_ENLARGED_LYMPH_NODES	R18	Enlarged lymph nodes
0.349625	0.0712831	4.90473	9.3556e-07	0.621253	145	453588	1.41853	C3_STOMACH_NEUROENDOCRINE	C3	Neuroendocrine tumor and carcinoma of stomach
0.0552643	0.0112898	4.89504	9.82834e-07	0.515711	7615	434894	1.05682	E4_PARATHYRO	E4	Disorders of parathyroid gland
0.0532842	0.0108902	4.89287	9.93772e-07	0.517045	8115	288472	1.05473	K11_PARODON_PERIAPIC_CHRONIC	K11	Chronic periapical parodontitis
0.325679	0.0667875	4.87635	1.08065e-06	0.617268	169	442914	1.38497	FELTY	RHEUMA	Felty syndrome
0.0182916	0.00375589	4.87012	1.11533e-06	0.505165	92358	322557	1.01846	SSRI	RX	Selective serotonin reuptake inhibitors
0.0518419	0.0106657	4.8606	1.1703e-06	0.514586	8266	433110	1.05321	COPD_EARLY	COPD	Early onset COPD
0.0347802	0.0071582	4.85878	1.18108e-06	0.509098	19780	432149	1.03539	H7_VISUDISTURB	H7	Visual disturbances
0.0473572	0.00974787	4.8582	1.18456e-06	0.51446	10366	341884	1.0485	G6_MIGRAINE_WITH_AURA	G6	Migraine with aura
0.0150296	0.0030969	4.8531	1.21548e-06	0.504003	247365	206368	1.01514	K11_DENTAL_OPER	K11	Dental operations
0.027457	0.00566098	4.85022	1.23325e-06	0.50882	33621	420112	1.02784	ST19_INJURI_ANKLE_FOOT	ST19	Injuries to the ankle and foot
0.030959	0.00639409	4.84181	1.28661e-06	0.506372	26066	287796	1.03144	M13_ARTHROSIS_OTH	M13	Other arthrosis
0.023311	0.00481704	4.83927	1.30315e-06	0.504956	54570	287796	1.02358	M13_ARTHROSIS_KNEE	M13	Gonarthrosis
0.0150754	0.00312121	4.82998	1.36543e-06	0.504295	172104	281629	1.01519	K11_CARIES_3_OPER	K11	Dental caries 3 and operation codes
0.0234706	0.0048623	4.82705	1.38569e-06	0.505867	50486	330460	1.02375	KRA_PSY_ANXIETY_EXMORE	KRA_PSY	Anxiety disorders
0.155892	0.0324198	4.80855	1.52032e-06	0.550273	768	439424	1.1687	M13_SYSTSLCE	M13	Systemic sclerosis
0.118056	0.0245846	4.80203	1.57062e-06	0.534272	1466	452267	1.12531	L12_AGEP	L12	Acute generalized exanthematous pustulosis
0.0543006	0.0113096	4.80128	1.57652e-06	0.513432	7713	287796	1.0558	M13_ARTHROSIS_POLY	M13	Polyarthrosis
0.0566123	0.0117936	4.80024	1.58475e-06	0.515828	6666	326530	1.05825	M13_ADHCAPSULITIS	M13	Adhesive capsulitis of shoulder
0.123426	0.0257201	4.79881	1.59613e-06	0.533199	1307	446969	1.13137	N14_CHRONEPHROPATH	N14	Chronic nephritic syndrome
0.342128	0.0713816	4.79295	1.6435e-06	0.619174	145	345118	1.40794	C3_STOMACH_NEUROENDOCRINE_EXALLC	C3	Neuroendocrine tumor and carcinoma of stomach
0.199181	0.0415952	4.78857	1.67975e-06	0.567066	459	341375	1.2204	DERMATOPOLY_FG	RHEUMA	Dermatopolymyositis (FG)
0.0273871	0.00573427	4.77605	1.78772e-06	0.504203	33364	420369	1.02777	G6_OTHNEU	G6	Other neurological diseases
0.0367751	0.00773578	4.7539	1.9953e-06	0.507735	18777	413784	1.03746	H7_MACULADEGEN	H7	Degeneration of macula and posterior pole
0.0208624	0.00439267	4.74937	2.0405e-06	0.502687	62785	384681	1.02108	BIGUANIDES	RX	Biguanides
0.0147002	0.00310264	4.73795	2.15887e-06	0.504167	183595	270138	1.01481	K11_CARIES_1_OPER	K11	Dental caries 1 and operation codes
0.06279	0.0132796	4.72831	2.26401e-06	0.514876	5622	446995	1.0648	I9_HYPOTE	I9	Hypotension
0.0638071	0.0134951	4.72818	2.26543e-06	0.520144	5037	423041	1.06589	L12_ATROPHICSKIN	L12	Atrophic disorders of skin
0.0339669	0.00719659	4.71986	2.36006e-06	0.507579	20977	333607	1.03455	R18_SYNCO_COLLAP	R18	Syncope and collapse
0.0568999	0.0120972	4.70356	2.55667e-06	0.515843	6310	447423	1.05855	DENTAL_TMD_OPER	DENTAL	TMD related operations
0.0262956	0.00559736	4.69787	2.62892e-06	0.506734	39264	215354	1.02664	O15_PREG_OTHER_MAT_DISORD	O15	Other maternal disorders predominantly related to pregnancy
0.0656236	0.0139705	4.6973	2.63624e-06	0.51945	4641	444965	1.06782	FESS	ASTHMA	FESS (DNB20)
0.0400815	0.00853854	4.69418	2.67672e-06	0.511804	13519	337881	1.0409	J10_CHRONRHINITIS	J10	Chronic rhinitis, nasopharyngitis and pharyngitis
0.0554681	0.0118335	4.68736	2.7675e-06	0.512977	7058	403877	1.05704	AB1_SEPSIS_VIRAL	AB1	Viral Sepsis
0.0522389	0.0111459	4.68682	2.77476e-06	0.514755	7755	288472	1.05363	K11_SALIVARY	K11	Diseases of salivary glands
-0.0522779	0.0111568	-4.68573	2.78962e-06	0.481959	7700	410029	0.949065	SPONDYLOARTHRITIS	ILD	Spondyloarthritis
0.0370192	0.00790613	4.68234	2.83612e-06	0.508689	16343	437390	1.03771	ST19_INJURI_ABDOMEN_LOWER_BACK_LUMBAR_SPINE_PELVIS	ST19	Injuries to the abdomen, lower back, lumbar spine and pelvis
-0.0336948	0.0072012	-4.67905	2.88204e-06	0.491512	20586	234032	0.966867	C3_BREAST	C3	Malignant neoplasm of breast
0.0376503	0.00804722	4.67867	2.88746e-06	0.505088	20044	182596	1.03837	I9_HEARTFAIL_AND_OVERWEIGHT	CARDIO	Heart failure and bmi 25plus
0.0458171	0.00980329	4.67365	2.95896e-06	0.51001	11595	231952	1.04688	I9_PAROXTAC	I9	Paroxysmal tachycardia
0.103309	0.0221129	4.6719	2.98429e-06	0.530286	1834	451899	1.10883	L12_BULLOUS	L12	Bullous disorders
0.0553314	0.0118453	4.67116	2.9951e-06	0.512923	7044	403877	1.05689	AB1_SEPSIS_VIRAL_IMPL	AB1	Implicit viral Sepsis
0.0216333	0.00464689	4.65543	3.23313e-06	0.505824	53313	394756	1.02187	F5_DEPRESSIO	F5	Depression
0.0318678	0.0068458	4.65509	3.23837e-06	0.505127	23153	322314	1.03238	M13_SPINSTENOSIS	M13	Spinal stenosis
0.0399097	0.00857571	4.65381	3.25854e-06	0.511894	13102	326530	1.04072	M13_ENTESOPATHYOTH	M13	Other enthesopathies
0.0399893	0.00859613	4.65202	3.28704e-06	0.508538	19070	51011	1.0408	DM2_RETINOPATHY	E4	Type 2 diabetes with retinopathy
0.0142887	0.00307298	4.64979	3.32273e-06	0.503845	193231	260502	1.01439	K11_CARIES_3_ONLYAVO	K11	Dental caries 3, only avohilmo
0.217124	0.0467371	4.64564	3.39019e-06	0.575373	354	287796	1.2425	M13_PALINDROMIC	M13	Palindromic rheumatism
-0.0334245	0.00720674	-4.63795	3.51881e-06	0.491567	20550	234066	0.967128	C3_BREAST_HER2NEG	C3	Malignant neoplasm of breast, HER2-negative
0.02046	0.0044202	4.62874	3.679e-06	0.505445	59257	394476	1.02067	L12_DERMATITISECZEMA	L12	Dermatitis and eczema
0.22613	0.0489361	4.62092	3.82045e-06	0.573159	328	412885	1.25374	H7_EXOPTHALMUS	H7	Exophthalmic conditions
0.151	0.0326922	4.61882	3.8592e-06	0.548938	755	452978	1.163	SYSTSCLE_ICD10	RHEUMA	Systemic sclerosis, icd10
0.0455188	0.00986797	4.61279	3.97306e-06	0.507379	11655	316345	1.04657	I9_HYPTENSHR	I9	Hypertensive heart and/or renal disease
0.0429013	0.00932504	4.60066	4.21156e-06	0.509484	11411	441230	1.04383	VWXY20_TYPE_ACCIDENT	VWXY20	Type of accident
0.118637	0.0258322	4.59261	4.37732e-06	0.537728	1282	287796	1.12596	M13_POLYARTHRITIS	M13	Polyarthritis, unspecified
0.339426	0.0741459	4.57781	4.69867e-06	0.626925	137	446523	1.40414	D3_DEF_IIGA	D3	Selective deficiency of immunoglobulin A [IgA]y
0.0511673	0.0112117	4.56372	5.02552e-06	0.51157	7867	437390	1.0525	ST19_FRACT_LUMBAR_SPINE_PELVIS	ST19	Fracture of lumbar spine and pelvis
0.0499182	0.0109715	4.54982	5.36929e-06	0.513742	8655	141300	1.05119	N14_PHIMOSIS	N14	Redundant prepuce, phimosis and paraphimosis
0.0635994	0.0140252	4.53466	5.76965e-06	0.516399	4894	384093	1.06567	E4_LIPOPROTNAS	E4	Disorder of lipoprotein metabolism, unspecified
0.0604668	0.0133378	4.53348	5.80188e-06	0.518783	5282	423041	1.06233	L12_OTHERDISSKINANDSUBCUTIS	L12	Other disorders of skin and subcutaneous tissue, not elsewhere classified
0.0139032	0.00306981	4.52902	5.92585e-06	0.503703	206440	247293	1.014	K11_CARIES_1_ONLYAVO	K11	Dental caries 1, only avohilmo
0.160643	0.0354817	4.5275	5.96861e-06	0.547285	679	450259	1.17427	AMPUTATION_ANKLEBONES	DIAB	Amputation of ankle bones
0.0150616	0.00332882	4.5246	6.05089e-06	0.502758	127897	325836	1.01518	F5_PSYCH	F5	Psychiatric diseases
0.0947932	0.0209687	4.5207	6.16341e-06	0.523368	2085	341375	1.09943	OSTEOPOROSIS_FRACTURE_FG	RHEUMA	Osteoporosis with pathological fracture (FG)
0.0457538	0.0101413	4.51165	6.43261e-06	0.514833	9311	326530	1.04682	M13_MYALGIA	M13	Myalgia
0.0290202	0.00643706	4.5083	6.53502e-06	0.505384	27146	341375	1.02945	COX_ARTHROSIS	RHEUMA	Coxarthrosis [arthrosis of hip](FG)
0.0418171	0.00927576	4.50821	6.53765e-06	0.512109	11572	333607	1.0427	R18_PAIN_NOT_ELSEW_CLASSIFIED	R18	Pain, not elsewhere classified
0.0535771	0.0118947	4.50427	6.66013e-06	0.514879	6758	445865	1.05504	G6_POLYOTHUNS	G6	Other and unspecified polyneuropathies, also in other diseases
0.0293153	0.00651579	4.49912	6.82342e-06	0.505394	28132	384436	1.02975	Z21_PRESENCE_OTH_FUNCTIONAL_IMPLANTNTS	Z21	Presence of other functional implants
0.0215135	0.00478324	4.49767	6.8702e-06	0.505782	50486	403247	1.02175	KRA_PSY_ANXIETY	KRA_PSY	Anxiety disorders
0.0334039	0.00743255	4.49427	6.98098e-06	0.506576	18172	428037	1.03397	R18_OTHER_SYMPTOMS_SIGNS_INVOLVI_NERVOUS_MUSCULOS_SYSTEMS	R18	Other symptoms and signs involving the nervous and musculoskeletal systems
0.0236391	0.00526517	4.48972	7.13178e-06	0.506435	43819	180063	1.02392	O15_ABORT_MEDICAL	O15	Medical abortion
0.0768709	0.0171683	4.4775	7.55226e-06	0.527591	3006	450727	1.0799	NAFLD	GASTRO	Nonalcoholic fatty liver disease
0.0764526	0.0170836	4.47521	7.63369e-06	0.520192	3104	401589	1.07945	ASTHMA_EOSINOPHIL_SUGG	ASTHMA	Suggestive for eosinophilic asthma
0.0873286	0.0195147	4.47502	7.64027e-06	0.522137	2349	423041	1.09126	L12_CORNSANDCALLOS	L12	Corns and callosities
0.0839458	0.0187753	4.47108	7.78248e-06	0.518289	2661	383930	1.08757	ILD_HOSPITAL_PNEUMONIA_SEPSIS	ILD	ILD, hospital admissions 3, with pneumonia sepsis
0.0310406	0.00695904	4.46047	8.17807e-06	0.507718	21047	432686	1.03153	L12_DISORDSKINAPPENDIX	L12	Disorders of skin appendages
0.0180159	0.004054	4.44398	8.83106e-06	0.503236	74560	322314	1.01818	M13_DORSALGIA	M13	Dorsalgia
0.0237894	0.00535594	4.44169	8.92555e-06	0.502527	41628	412105	1.02407	I9_CEREBVASC	I9	Cerebrovascular diseases
-0.090723	0.0204715	-4.43168	9.35035e-06	0.474526	2349	344581	0.913271	CD2_INSITU_SKIN_FACE_EXALLC	CD2	Carcinoma in situ of skin of other and unspecified parts of face
0.0474992	0.010727	4.428	9.51091e-06	0.514192	8429	426987	1.04865	L12_CELLULITIS	L12	Cellulitis
-0.0370571	0.00839237	-4.41557	1.00745e-05	0.489563	14164	439569	0.963621	CD2_INSITU	CD2	In situ neoplasms
0.0663196	0.0150273	4.41328	1.01817e-05	0.517068	4163	449570	1.06857	G6_MYONEU	G6	Diseases of the myoneural junction and muscle
0.0569077	0.012915	4.40633	1.05138e-05	0.517609	5449	326530	1.05856	M13_RHEUMATISM	M13	Rheumatism, unspecified
0.0982592	0.0223	4.40625	1.05177e-05	0.529369	1868	423041	1.10325	L12_DECUBITANSULCERANDPRESSURE	L12	Decubitus ulcer and pressure area
0.0211826	0.00480888	4.4049	1.05834e-05	0.505763	49916	403817	1.02141	F5_NEUROTIC	F5	Neurotic, stress-related and somatoform disorders
0.0170978	0.00391047	4.37231	1.22937e-05	0.503497	82543	371190	1.01724	VWXY20_FALL_SAME_LEVEL	VWXY20	Fall on same level
0.175015	0.0400323	4.37185	1.23197e-05	0.560741	504	449570	1.19126	G6_MYASTHENIA	G6	Myasthenia gravis
0.325246	0.0744475	4.36879	1.24937e-05	0.612238	132	448636	1.38437	ILD_SYST_AUTO	ILD	ILD related to systemic autoimmune disease
0.0783043	0.0179288	4.36752	1.25664e-05	0.519365	3151	394476	1.08145	L12_INTERNALSUBSTANCEDERM	L12	Dermatitis due to substances taken internally
0.0413639	0.0094848	4.36107	1.29427e-05	0.514525	12010	98965	1.04223	RX_FENAMATES	RX	Fenamates
0.0196657	0.00451607	4.35461	1.33303e-05	0.504856	59121	330460	1.01986	KRA_PSY_MOOD_EXMORE	KRA_PSY	Mood disorders
0.0688649	0.0158432	4.34665	1.38233e-05	0.520456	3632	450101	1.07129	K11_PERITON	K11	Diseases of peritoneum
0.059765	0.0137849	4.33555	1.45395e-05	0.516687	4869	448864	1.06159	CIRRHOSIS_BROAD	GASTRO	Cirrhosis, broad definition used in the article https://doi.org/10.1101/594523
0.0580764	0.0134211	4.32725	1.50986e-05	0.515705	5065	448668	1.0598	OPER_SHB00	DENTAL	Preparation and fitting of bite rail to mouth
-0.0376331	0.00870479	-4.32327	1.53735e-05	0.490635	12800	440933	0.963066	RX_ERPLUS	RX	Medicines for HER+ breast cancer
0.0459706	0.0106732	4.30709	1.65416e-05	0.51411	8455	440335	1.04704	H8_EXTOTITIS	H8	Otitis externa
0.0712031	0.0165476	4.30293	1.68552e-05	0.52356	3262	423041	1.0738	L12_LICHENSCLERATROPH	L12	Lichen sclerosus et atrophicus
0.135332	0.0315335	4.29169	1.77316e-05	0.545683	845	423041	1.14492	L12_GRANULOMATOUSSKIN	L12	Granulomatous disorders of skin and subcutaneous tissue
0.0568293	0.0132428	4.29134	1.776e-05	0.516699	5364	288472	1.05848	K11_PERIODON_CHRON	K11	Chronic periodontitis
0.0493815	0.0115168	4.28779	1.80457e-05	0.51408	7202	446531	1.05062	D3_COAGDEF_PURPUR_HAEMORRHAGIC	D3	Coagulation defects, purpura and other haemorrhagic conditions
0.129007	0.0300975	4.2863	1.81676e-05	0.539415	968	446531	1.1377	D3_ITP	D3	Idiopathic thrombocytopenic purpura
0.0381587	0.00893347	4.27144	1.94217e-05	0.508122	12503	441230	1.0389	VWXY20_SUPPLE_FACTO_RELATED_CAUSES_MORBIDI_MORTA_CLASSIFIED_ELSEW	VWXY20	Supplementary factors related to causes of morbidity and mortality classified elsewhere
0.0273224	0.00642781	4.25065	2.13149e-05	0.505844	26783	249893	1.0277	ST19_CONCUSSION	ST19	Concussion
0.0274924	0.00647184	4.248	2.15691e-05	0.503099	27303	411682	1.02787	I9_STR_EXH	I9	Ischaemic Stroke, excluding all haemorrhages
0.0661372	0.0156092	4.23707	2.2646e-05	0.51776	3819	394476	1.06837	L12_PRURITUS	L12	Pruritus
-0.0676215	0.0159597	-4.237	2.26524e-05	0.481904	4078	345118	0.934614	C3_SQUOMOUS_CELL_CARCINOMA_SKIN_EXALLC	C3	Squamous cell neoplasms and carcinomas of the skin
0.0230755	0.00545277	4.23188	2.31751e-05	0.504495	37506	397685	1.02334	R18_DIZZI_GIDDI	R18	Dizziness and giddiness
-0.0438114	0.0103557	-4.23065	2.33021e-05	0.487327	9150	245468	0.957134	N14_ENDOMETRIOSIS_ASRM_STAGE3_4	N14	Endometriosis ASRM stages 3,4
0.0148828	0.00353287	4.21266	2.5238e-05	0.50231	120242	333491	1.01499	M13_ARTHROSIS_INCLAVO	M13	Artrosis, including avohilmo
0.0543008	0.0129381	4.19696	2.70525e-05	0.51367	5834	384093	1.0558	E4_FH	E4	Familial hypercholesterolemia
0.0471566	0.0112387	4.19593	2.71757e-05	0.512649	7562	397583	1.04829	K11_ACUTPANC	K11	Acute pancreatitis
0.0285089	0.00680749	4.18787	2.81587e-05	0.505372	24275	333607	1.02892	R18_MALAI_FATIG	R18	Malaise and fatigue
0.0856371	0.0204632	4.18493	2.85254e-05	0.524116	2148	450101	1.08941	K11_PERITONITIS	K11	Acute peritonitis
0.0345367	0.00826606	4.17814	2.93908e-05	0.508284	14824	413113	1.03514	ST19_FRACT_SHOUL_UPPER_ARM	ST19	Fracture of shoulder and upper arm
0.0483047	0.0115634	4.17737	2.94902e-05	0.516593	7060	440367	1.04949	AB1_SEXUAL_TRANSMISSION_NOS	AB1	Other predominantly sexually transmitted diseases, not elsewhere classified
0.0214376	0.00513271	4.17666	2.95818e-05	0.50569	42717	287796	1.02167	M13_KNEEDERANGEMENTS	M13	Internal derangement of knee
0.0139785	0.00336677	4.15189	3.29737e-05	0.502677	123273	330460	1.01408	KRA_PSY_ANYMENTAL	KRA_PSY	Any mental disorder
0.0596149	0.0143895	4.14294	3.42888e-05	0.514392	4510	443609	1.06143	AB1_DERMATOPHYTOSIS	AB1	Dermatophytosis
0.248038	0.0601345	4.12472	3.71189e-05	0.585009	206	322314	1.28151	M13_ATLOAXSUBLUX	M13	Atlantoaxial subluxation
0.293933	0.0714067	4.11633	3.84959e-05	0.6018	144	448377	1.34169	ILD_ELSEWHERE	ILD	ILD and respiratory illness in diseases classified elsewhere
0.0267869	0.00651027	4.11457	3.87908e-05	0.505547	27146	287796	1.02715	M13_ARTHTROSIS_COX	M13	Coxarthrosis
0.0701314	0.0170589	4.11114	3.93712e-05	0.517382	3278	436208	1.07265	N14_RENFAILNAS	N14	Unspecified kidney failure
0.0410328	0.00998201	4.11067	3.94512e-05	0.512208	9782	420112	1.04189	ST19_FRACT_FOOT_ANKLE	ST19	Fracture of foot, except ankle
0.0182697	0.00444812	4.10729	4.00336e-05	0.5048	58977	394756	1.01844	F5_MOOD	F5	Mood [affective] disorders
0.0194396	0.00474561	4.09632	4.19762e-05	0.506323	49266	404467	1.01963	VWXY20_EXPOS_UNSPE_FACTOR	VWXY20	Exposure to unspecified factor
0.0615016	0.0150152	4.09596	4.20418e-05	0.51684	4112	288472	1.06343	K11_MISS_TEETH_ACCID_EXTR_PAROD	K11	Missing teeth due to accident, extraction or parodontitis
0.0496392	0.0121326	4.09139	4.28799e-05	0.511554	6738	446995	1.05089	I9_OTH	I9	Other CVD
0.0140235	0.00342956	4.08901	4.3322e-05	0.503024	118054	335679	1.01412	FALLS	MISC	Falls/tendency to fall
0.0255359	0.0062531	4.08371	4.43216e-05	0.509582	29553	217833	1.02586	Z21_FOLLOW__EXAM_TREAT_CONDI_OTH_MALIG_NEOPLASMS	Z21	Follow-up examination after treatment for conditions other than malignant neoplasms
0.146424	0.0359252	4.07582	4.58532e-05	0.541413	658	413784	1.15769	H7_BCKRNDRETINOPAT	H7	Background retinopathy and retinal vascular changes
0.0180853	0.00444313	4.07041	4.69301e-05	0.504748	59121	394612	1.01825	KRA_PSY_MOOD	KRA_PSY	Mood disorders
0.0511343	0.0125772	4.06563	4.7903e-05	0.516214	5982	404657	1.05246	G6_MIGRAINE_WITH_AURA_TRIPTAN	G6	Migraine with aura and triptan purchases
0.0492323	0.0121141	4.06406	4.82268e-05	0.513909	6392	403817	1.05046	F5_SOMATOFORM	F5	Somatoform disorder
-0.0358445	0.00885288	-4.04891	5.14567e-05	0.490649	13182	439767	0.96479	ATOPIC_STRICT	L12	Atopic dermatitis, strict definition
-0.0549698	0.0136528	-4.02625	5.66728e-05	0.486461	5122	344792	0.946514	C3_MELANOMA_EXALLC	C3	Malignant melanoma
0.0373742	0.00929599	4.02046	5.80835e-05	0.511631	12552	422407	1.03808	H8_SUP_ACUTE	H8	Acute suppurative otitis media
0.227675	0.0567462	4.01216	6.01661e-05	0.582918	235	449570	1.25568	G6_MYOMUSCINOTH	G6	Disorders of myoneural junction and muscle in diseases classified elsewhere
-0.0399111	0.00995048	-4.01098	6.0468e-05	0.489855	9600	444133	0.960875	RX_L02BG	RX	L02BG Aromatase inhibitors
0.348702	0.0869436	4.01067	6.05466e-05	0.623012	96	384093	1.41723	E4_AMYL_SCNDSYST	E4	Secondary systemic amyloidosis
0.0220563	0.00550647	4.00553	6.18789e-05	0.507978	35281	418452	1.0223	VWXY20_EXPOS_OTHER_SPECIFE_FACTO	VWXY20	Exposure to other specified factors
0.0293853	0.00735899	3.99312	6.5209e-05	0.505957	18848	434885	1.02982	ST19_INJURI_THORAX	ST19	Injuries to the thorax
0.117974	0.0295809	3.98819	6.65799e-05	0.534866	1008	446969	1.12522	N14_NEPHROTICSYND	N14	Nephrotic syndrome
0.0290206	0.00728361	3.98437	6.76604e-05	0.507248	18835	434898	1.02945	ABDOM_HERNIA	K11	Hernia of abdominal wall
0.0371313	0.00932404	3.98231	6.82475e-05	0.507882	11410	434885	1.03783	ST19_FRACT_RIBS_STERNUM_THORACIC_SPINE	ST19	Fracture of rib(s), sternum and thoracic spine
0.0325632	0.00818425	3.97876	6.92758e-05	0.508105	14741	429396	1.0331	H7_KERATITIS	H7	Keratitis
0.0414452	0.010427	3.97481	7.04346e-05	0.506728	10283	316345	1.04232	I9_HYPTENSHD	I9	Hypertensive Heart Disease
0.03856	0.00970414	3.97356	7.08075e-05	0.510919	10270	360393	1.03931	K11_FISSANAL	K11	Fissure and fistula of anal and rectal regions
0.0159418	0.00401447	3.97109	7.15441e-05	0.502469	77222	376511	1.01607	RX_N05C	F5	Use of hypnotics and sedatives
0.0773531	0.0194954	3.96776	7.25501e-05	0.514193	2722	231952	1.08042	I9_CARDARR	I9	Cardiac arrest
0.0368327	0.0092835	3.96755	7.26154e-05	0.511561	12760	200533	1.03752	O15_MATERN_CARE_OTHER	O15	Maternal care for other known or suspected fetal problems
0.0378366	0.00954053	3.96588	7.3125e-05	0.508029	10684	412885	1.03856	H7_BLEPHAROCHALASIS	H7	Blepharochalasis
0.0227577	0.00573864	3.9657	7.31815e-05	0.503772	34881	342690	1.02302	I9_OTHARR	I9	Other arrhythmias
0.0258419	0.00653152	3.95649	7.60594e-05	0.504041	24345	322314	1.02618	M13_SPONDYLOSIS	M13	Spondylosis
0.0284859	0.00720203	3.95526	7.64518e-05	0.505291	20556	433177	1.0289	ST19_INJURI_HIP_THIGH	ST19	Injuries to the hip and thigh
-0.0650636	0.0164597	-3.95291	7.72073e-05	0.479947	3459	245468	0.937008	N14_ENDOMETRIOSIS_DEEP	N14	Deep endometriosis
0.0507035	0.01283	3.95196	7.75146e-05	0.508782	5968	443741	1.05201	PAR	DIAB	Peripheral arterial reconstruction
0.0411071	0.0104137	3.94739	7.90063e-05	0.507455	9511	444222	1.04196	I9_NCMI	I9	Myocardial infarction, unclassifiable
0.0728265	0.0184555	3.94605	7.94501e-05	0.520267	2698	448722	1.07554	VWXY20_ASSAU_BODILY_FORCE	VWXY20	Assault by bodily force
0.037973	0.00962645	3.94465	7.99169e-05	0.509858	10739	234147	1.0387	O15_GESTAT_HYPERT	O15	Gestational [pregnancy-induced] hypertension
0.130553	0.033102	3.94396	8.01476e-05	0.543784	748	341375	1.13946	ARTHRO_SPEC	RHEUMA	Other specific arthropathies
0.161244	0.0410419	3.92878	8.53793e-05	0.554137	461	453272	1.17497	CREST	RHEUMA	CR(E)ST syndrome
0.044087	0.0112225	3.92845	8.54949e-05	0.511725	7562	445534	1.04507	PANCREATITIS	DIAB	Acute pancreatitis (for exclusion)
-0.0421451	0.0107297	-3.92787	8.57e-05	0.489281	8801	345118	0.958731	C3_COLORECTAL_EXALLC	C3	Colorectal cancer
0.14288	0.0364475	3.92017	8.84882e-05	0.538408	618	432686	1.15359	L12_NAILNAS	L12	Other and unspecified nail disorders
0.0173869	0.0044364	3.91916	8.88585e-05	0.504416	59385	394348	1.01754	F5_ADO	F5	Affective disorder, aux endpoint for F5_SAD
0.119405	0.0304672	3.91913	8.88703e-05	0.536754	946	420324	1.12683	I9_ARTEMBTHRNAS	I9	Other arterial embolism and thrombosis
0.145249	0.0371235	3.91258	9.13135e-05	0.543158	607	384093	1.15633	E4_AMYLOIDOSIS	E4	Amyloidosis
0.0154604	0.00395558	3.9085	9.28696e-05	0.50377	84760	368973	1.01558	N14_URINOTH	N14	Other diseases of urinary system
0.169571	0.0434249	3.90494	9.42503e-05	0.553758	430	439424	1.1848	M13_NECROVASCNAS	M13	Other specified/unspecified necrotizing vasculopathies
0.140041	0.0358858	3.90241	9.52413e-05	0.543806	650	443609	1.15032	AB1_OTHER_SUPERF_MYCOSIS	AB1	Other superficial mycoses
0.0205818	0.00527855	3.89915	9.65329e-05	0.506202	37888	415845	1.0208	K11_APPENDIX	K11	Diseases of appendix
0.0250363	0.00642632	3.89589	9.78369e-05	0.506196	24999	385381	1.02535	ST19_FRACT_LOWER_LEG_INCLU_ANKLE	ST19	Fracture of lower leg, including ankle
0.151566	0.0389476	3.89155	9.96049e-05	0.545052	547	453186	1.16366	K11_ORAL_LEUCOPLACIA	K11	Oral leukoplakia
0.0310615	0.00800171	3.88185	0.000103664	0.506087	16489	433110	1.03155	COPD_MULTIMORB	COPD	COPD related to multimorbidity
0.0299877	0.00773416	3.8773	0.000105621	0.508269	16901	403817	1.03044	F5_STRESSOTH	F5	Other reaction to severe stress, and adjustment disorders
0.123198	0.0317793	3.87668	0.00010589	0.535858	837	452896	1.13111	K11_ORAL_LEUCOPLACIA_INCLAVO	K11	Oral leukoplakia, including avohilmo
0.0811217	0.0209789	3.86682	0.000110263	0.52093	2068	397583	1.0845	K11_CHOLANGI	K11	Cholangitis (primary sclerosing, PSC)
0.0186341	0.00482402	3.86278	0.000112105	0.504915	52581	368973	1.01881	N14_CYSTITIS	N14	Cystitis
0.0215681	0.00558475	3.86196	0.000112481	0.505421	33727	420006	1.0218	VWXY20_COMPLICATIO_MEDICAL_SURGI_CARE	VWXY20	Complications of medical and surgical care
0.0126999	0.00328864	3.86173	0.000112585	0.501521	131419	322314	1.01278	M13_DORSOPATHY	M13	Dorsopathies
0.0119204	0.00309428	3.85241	0.000116963	0.503201	237021	216712	1.01199	K11_DENTAL_OPER_ONLYAVO	K11	Dental operations, only avohilmo
0.051326	0.0133298	3.85046	0.000117896	0.514933	5431	385381	1.05267	ST19_OPEN_WOUND_LOWER_LEG	ST19	Open wound of lower leg
0.133403	0.0347023	3.84421	0.000120942	0.540116	693	441039	1.14271	AB1_CMV	AB1	Cytomegaloviral disease
0.0547699	0.0142569	3.84163	0.000122218	0.517219	4504	326530	1.0563	M13_TENDOSYNOVITISNAS	M13	Other/unspecified synovitis and tenosynovitis
0.0203358	0.00529727	3.83892	0.000123576	0.506094	37595	415845	1.02054	APPENDICITIS_BROAD	K11	Appendicitis, broad definition
0.0870208	0.0226818	3.83659	0.000124756	0.522566	1788	384093	1.09092	E4_HYPERKALAEMIA	E4	Hyperkalaemia
0.0231717	0.00604776	3.83146	0.000127385	0.507434	31326	422407	1.02344	H8_MIDDLEMASTOID	H8	Diseases of middle ear and mastoid
0.135901	0.0354848	3.82983	0.00012823	0.541686	658	443701	1.14557	IBD_CMV	AB1	Cytomegalovirus infection, IBD co-morbidity
0.111156	0.0290257	3.82958	0.000128361	0.531964	1033	384093	1.11757	E4_LACTOSEINT	E4	Lactose intolerance
0.20769	0.0544258	3.81603	0.000135619	0.573944	261	439424	1.23083	M13_POLYMYO	M13	Polymyositis
0.0378479	0.00993188	3.81075	0.000138548	0.507039	10714	433177	1.03857	ST19_FRACT_FEMUR	ILD	Fracture of femur
0.0697128	0.0183248	3.80429	0.000142212	0.519564	2717	434925	1.0722	R18_ELEVATED_ERYTHROCYTE_SEDIM_RATE_ABNORMALITY_PLASMA_VISCO	R18	Elevated erythrocyte sedimentation rate and abnormality of plasma viscosity
-0.126626	0.0333036	-3.80217	0.000143436	0.457977	805	344964	0.881063	CD2_INSITU_SKIN_TRUNK_EXALLC	CD2	Carcinoma in situ of skin of trunk
-0.04263	0.0112296	-3.79624	0.000146909	0.484784	7516	429396	0.958266	H7_IRIDOACUTE	H7	Acute and subacute iridocyclitis
0.141633	0.0373691	3.79013	0.000150571	0.543485	626	438521	1.15215	VIRALPNEUMOKNOWN	ASTHMA	Viral pneumonia (known virus, not influenza)
0.0751258	0.019835	3.78753	0.000152152	0.518881	2268	446895	1.07802	POLYPECTOMY	ASTHMA	Polypectomy (DHB20)
0.0285616	0.00754557	3.78521	0.00015358	0.504314	18521	397685	1.02897	R18_OTHER_SYMPTOMS_SIGNS_INVOLVI_COGNITIVE_FUNCTIONS_AWARE	R18	Other symptoms and signs involving cognitive functions and awareness
0.100612	0.0266474	3.77568	0.000159572	0.53398	1175	385630	1.10585	E4_THYROIDITSUBAC	E4	Subacute thyroiditis
0.020601	0.00545987	3.77317	0.000161187	0.506206	35180	415845	1.02081	K11_APPENDACUT	K11	Acute appendicitis
0.0416491	0.0110434	3.7714	0.000162333	0.515047	7652	287796	1.04253	M13_PATELLAOTH	M13	Other disorders of patella
0.0264121	0.00700462	3.77066	0.000162813	0.508079	22768	236510	1.02676	F5_DEPRESSION_RECURRENT	F5	Recurrent or chronic depression
0.0197844	0.00525348	3.76597	0.000165903	0.504901	38107	415626	1.01998	K11_PARODON_DENTAL_OPER	K11	Parodontitis and operation codes
0.158358	0.0421418	3.75774	0.000171458	0.548812	459	451665	1.17159	K11_PSC_COLITIS	K11	Colitis, primary sclerosing
0.0322301	0.0085817	3.75567	0.000172876	0.50765	16493	108817	1.03276	O15_DELIV_CAESAR	O15	Single delivery by caesarean section
0.0841723	0.0224225	3.75392	0.000174093	0.522226	1800	420324	1.08782	I9_OTHANEUR	I9	Other aneurysm
0.017109	0.00457072	3.74317	0.000181712	0.503417	53150	400583	1.01726	M13_LOWBACKPAINORANDSCIATICA	M13	Lower back pain or/and sciatica
0.109988	0.0294234	3.73811	0.000185407	0.534393	965	437420	1.11626	PSORI_STRICT	L12	Psoriasis (vulgaris), strict definition
-0.0546308	0.0146167	-3.73756	0.000185816	0.485954	4760	181658	0.946835	O15_POSTPART_HAEMORRH_PLACENTA	O15	Postpartum haemorrhage due to retained placenta
0.0227192	0.00608279	3.735	0.000187715	0.505011	29521	406534	1.02298	N14_PYELONEPHR	N14	Acute tubulo-interstitial nephritis
0.0120206	0.00322422	3.72823	0.000192828	0.503303	257656	196077	1.01209	N14_GENITOURINARY	N14	Genitourinary diseases
0.0454896	0.0122209	3.72227	0.000197437	0.514601	6396	447337	1.04654	E4_PCOS_BROAD_EXCLUSIONS	E4	Exclusions for E4_PCOS_BROAD
0.0161671	0.00434426	3.72148	0.000198059	0.503993	74555	180063	1.0163	O15_PREG_ABORT	O15	Pregnancy with abortive outcome
0.0175813	0.0047437	3.70624	0.000210359	0.506197	53926	337881	1.01774	J10_CHRONTONSADEN	J10	Chronic diseases of tonsils and adenoids
0.0338189	0.00913062	3.7039	0.000212308	0.510064	11742	360393	1.0344	K11_IBS	K11	Irritable bowel syndrome
0.0305483	0.00824921	3.70318	0.000212912	0.504241	15980	384681	1.03102	SULFONYLUREAS	RX	Sulfonylureas
0.0188136	0.00508665	3.69863	0.00021677	0.504606	41101	412632	1.01899	K11_PARODON_OPER	K11	Parodontitis or operation codes
0.0346721	0.00942014	3.68064	0.000232652	0.506618	12371	342690	1.03528	I9_CONDUCTIO	I9	Conduction disorders
0.0437693	0.0119131	3.67405	0.000238734	0.511128	6837	403431	1.04474	AB1_BACT_INTEST_OTH	AB1	Other bacterial intestinal infections
0.0346205	0.0094242	3.67357	0.000239183	0.510011	10792	442941	1.03523	K11_FISTULA	K11	Colonic or urogenital fistula
0.0225424	0.00615079	3.66496	0.000247378	0.505646	27212	420006	1.0228	VWXY20_SURGI_OTHER_MEDICAL_PROCED_CAUSE_ABNORMAL_REACTION_PATIENT_COMPLICATION_WO_MENTION_MISAD_TIME_PROCED	VWXY20	Surgical and other medical procedures as the cause of abnormal reaction of the patient, or of later complication, without mention of misadventure at the time of the procedure
0.065769	0.0179482	3.66438	0.000247939	0.518485	2793	420324	1.06798	I9_OTHPER	I9	Other peripheral vascular diseases
0.0314484	0.00858532	3.66304	0.000249235	0.5119	13366	440367	1.03195	AB1_SEXUAL_TRANSMISSION	AB1	Infections with a predominantly sexual mode of transmission
-0.0303757	0.00829755	-3.66081	0.000251423	0.492698	15418	345118	0.970081	C3_DIGESTIVE_ORGANS_EXALLC	C3	Malignant neoplasm of digestive organs
0.0217228	0.00593646	3.65922	0.000252981	0.501725	33096	406425	1.02196	I9_STR_SAH	I9	Stroke, including SAH
0.0491137	0.0134587	3.64922	0.000263039	0.516378	5103	378074	1.05034	RX_A07EA	RX	Budesonide
0.0185962	0.00509929	3.64683	0.000265497	0.504597	40863	412870	1.01877	K11_PERIODON_CHRON_INCLAVO	K11	Chronic periodontitis
0.0733005	0.02014	3.63955	0.00027311	0.518826	2242	423041	1.07605	L12_CHRONICULCEROFSKIN	L12	Chronic ulcer of skin, not elsewhere classified
0.096004	0.0263956	3.63712	0.000275709	0.528417	1243	392860	1.10076	I9_VARICVEOES	I9	Oesophageal varices
0.0184794	0.0050894	3.63097	0.000282363	0.504515	41050	412683	1.01865	K11_PARODON	K11	Parodontitis
0.096658	0.0266567	3.62603	0.00028781	0.528765	1216	439424	1.10148	M13_GIANTCELL	M13	Giant cell arteritis
0.101631	0.0280994	3.61683	0.000298228	0.530896	1086	439424	1.10697	M13_TEMPARTERIT	M13	Temporal arteritis
0.028181	0.00781247	3.60719	0.000309531	0.508861	18213	422407	1.02858	H8_MED_SUPP	H8	Suppurative and unspecified otitis media
0.0529265	0.014673	3.60706	0.00030969	0.514679	4466	378292	1.05435	J10_VIRALPNEUMO	J10	Viral pneumonia
0.0222269	0.00616802	3.60357	0.000313876	0.501876	30521	408788	1.02248	I9_STR	I9	Stroke, excluding SAH
-0.0201636	0.00559606	-3.60318	0.000314351	0.495207	37952	216666	0.980038	CD2_BENIGN_LEIOMYOMA_UTERI	CD2	Leiomyoma of uterus
0.0309646	0.00861263	3.59525	0.000324082	0.50999	13398	440335	1.03145	H8_EXTERNAL	H8	Diseases of external ear
0.0805252	0.0224414	3.58825	0.000332909	0.52239	1768	444295	1.08386	ST19_SEQUEL_INJURI_HEAD	ST19	Sequelae of injuries of head
0.113626	0.0317532	3.57842	0.000345683	0.542899	830	446523	1.12033	D3_IMMUDEFANTIBODY	D3	Immunodeficiency with predominantly antibody defects
0.0385738	0.0107943	3.57352	0.000352208	0.50811	8536	445197	1.03933	GOUT_IDIOP_NOS	RHEUMA	Gout, strict definition
0.104405	0.0292767	3.56613	0.000362298	0.532103	1015	452718	1.11005	D3_HAEMOLYTICANAEMIA	D3	Haemolytic anaemias
-0.029086	0.0082177	-3.53943	0.000400995	0.491644	15186	336430	0.971333	CD2_BENIGN_SKIN_EXALLC	CD2	Other benign neoplasms of skin
-0.0630283	0.0178077	-3.53939	0.000401051	0.480328	2930	119468	0.938917	N14_ENDOMETRIOSIS_RECTPVAGSEPT_VAGINA	N14	Endometriosis of rectovaginal septum and vagina
0.0153436	0.00433927	3.536	0.000406236	0.502205	65892	387841	1.01546	K11_HERNIA	K11	Hernia
0.0458396	0.0129751	3.53288	0.000411061	0.510753	5793	445197	1.04691	GOUT_STRICT	RHEUMA	Gout, strict definition
0.160204	0.0453482	3.53275	0.000411266	0.553216	377	385630	1.17375	E4_THYROIDNASOTH	E4	Disorder of thyroid, unspecified
0.0233107	0.00661087	3.52612	0.000421696	0.503996	23458	322314	1.02358	M13_SCIATICA	M13	Sciatica+with lumbago
0.072916	0.0207289	3.5176	0.00043547	0.522211	2125	429826	1.07564	M13_OSTEOMYELITIS	M13	Osteomyelitis
0.0522878	0.014882	3.51349	0.000442254	0.51725	4326	384436	1.05368	Z21_PERSONAL_HISTORY_OTH_DISEA_CONDI	Z21	Personal history of other diseases and conditions
0.0358029	0.0102019	3.50943	0.000449065	0.509164	9263	387841	1.03645	K11_VENTHER	K11	Ventral hernia
0.0263906	0.00752699	3.50613	0.00045468	0.50604	17872	322557	1.02674	MRI_NONSEL	RX	Non-selective monoamine reuptake inhibitors
0.0373506	0.0106737	3.4993	0.000466474	0.507867	8371	322314	1.03806	M13_CERVICALGIA	M13	Cervicalgia
0.0395545	0.0113038	3.49924	0.000466587	0.507893	7624	446109	1.04035	J10_RESPDISOTH	J10	Other respiratory disorders and diseases
0.0395545	0.0113038	3.49924	0.000466587	0.507893	7624	446109	1.04035	J10_RESPOTHER	J10	Other diseases of the respiratory system
0.062309	0.0178168	3.49721	0.000470149	0.516086	2859	432686	1.06429	L12_NAILDIS	L12	Nail disorders
-0.0302117	0.00864469	-3.49483	0.000474361	0.492163	13966	394239	0.97024	ATOPIC_STRICT_REIMB	L12	Atopic dermatitis, strict definition with reimbursement
0.0559171	0.0160021	3.49436	0.000475205	0.513879	3644	435872	1.05751	AB1_VIRAL_WARTS	AB1	Viral warts
0.110868	0.0317612	3.49066	0.000481822	0.52583	901	104642	1.11725	ANOSMIA	NEURO	Anosmia
0.0418758	0.0120219	3.48329	0.000495296	0.511817	6684	434894	1.04276	E4_HYPERPARA	E4	Hyperparathyroidism
0.118088	0.0339733	3.47591	0.000509127	0.540757	717	453016	1.12534	DRUGADVERS_CATAR	H7	Drug-induced cataract
0.0252456	0.00726884	3.47313	0.000514422	0.504645	20623	372627	1.02557	J10_COPDNAS	J10	Other chronic obstructive pulmonary disease
0.0975961	0.0281126	3.47161	0.000517349	0.529744	1086	451738	1.10252	GIANT_CELL_TEMP_ARTERITIS	RHEUMA	Giant cell arteritis with polymyalgia rheumatica
0.255848	0.0737738	3.468	0.000524349	0.578536	149	451816	1.29156	Q17_OTHER_CONGEN_MALFO_URINARY_SYSTEM	Q17	Other congenital malformations of urinary system
0.145281	0.0419505	3.46315	0.000533898	0.548351	456	423041	1.15636	L12_GRANUANNU	L12	Granuloma annulare
0.0537385	0.0155176	3.46306	0.000534078	0.516581	3850	440335	1.05521	H8_EXT_NAS	H8	Otitis externa, unspecified
0.17407	0.0502873	3.46152	0.000537139	0.549495	330	433007	1.19014	D3_NUTRIANAEMIAOTHER	D3	Other nutritional anaemias
0.214543	0.062027	3.45887	0.000542447	0.569992	196	287796	1.2393	M13_FINGERDEFORM	M13	Deformity of finger(s)
0.100949	0.0291976	3.45746	0.0005453	0.525832	1024	403936	1.10622	AB1_SEPSIS_FUNGAL_IMPL	AB1	Implicit fungal Sepsis
0.0829878	0.0240842	3.44573	0.000569519	0.524022	1514	433899	1.08653	K11_MALABSORB	K11	Intestinal malabsorption
0.0728474	0.0211897	3.43787	0.000586319	0.519771	2049	420324	1.07557	I9_ARTEMBTHR	I9	Arterial embolism and thrombosis
0.0542543	0.0158215	3.42916	0.000605455	0.512733	3760	446913	1.05575	C_DIFFICILE_ENTEROCOLITIS	AB1	Enterocolitis due to Clostridium difficile
0.0477222	0.0139405	3.42327	0.000618732	0.512304	4871	448862	1.04888	OPER_SFA	DENTAL	Direct fill therapy
0.162176	0.0474633	3.41687	0.000633451	0.550268	354	451665	1.17607	K11_PSC_COLITIS_STRICT	K11	Colitis, primary sclerosing, strict definition
0.0259511	0.00759896	3.41508	0.000637624	0.50615	17991	337881	1.02629	J10_VASOALLERRHIN	J10	Vasomotor and allergic rhinitis
0.134827	0.0394981	3.4135	0.000641336	0.541082	526	445490	1.14434	D3_SPLEENDISEASE	D3	Diseases of spleen
0.0177156	0.0052	3.40685	0.000657172	0.505655	40160	413573	1.01787	H7_CONJUNCTIVA	H7	Disorders of conjunctiva
0.131416	0.0385741	3.40684	0.000657195	0.540393	549	453075	1.14044	CMV_NOS	AB1	Other/unspecified cytomegaloviral diseases
0.143	0.0419813	3.40627	0.000658578	0.545247	464	440301	1.15373	K11_TOXLIV	K11	Toxic liver disease
0.161371	0.0474404	3.40156	0.000670032	0.555361	346	453387	1.17512	DRUGADVERS_OSTEOPO	M13	Drug-induced osteoporosis
0.138988	0.0408774	3.40013	0.000673545	0.539545	492	384093	1.14911	E4_AMYLNAS	E4	Amyloidosis, other/unspecified
0.0271366	0.00799607	3.39374	0.000689458	0.508956	16802	237816	1.02751	GEST_DIABETES	DIAB	Gestational diabetes (for exclusion)
-0.037099	0.0109375	-3.39191	0.000694078	0.486684	7945	445788	0.963581	H7_IRIDOCYC_ANTER	H7	Anterior Iridocyclitis
0.0332412	0.0098101	3.38846	0.000702861	0.507952	10755	333607	1.0338	R18_CONVU_NOT_ELSEW_CLASSIFIED	R18	Convulsions, not elsewhere classified
0.226547	0.06698	3.38231	0.00071878	0.580939	162	439424	1.25426	M13_DERMATOPOLYNAS	M13	Dermatopolymyositis, unspecified
0.0882577	0.0260993	3.38162	0.000720605	0.525135	1298	441336	1.09227	I9_SECONDRIGHT	I9	Secondary right heart disease
-0.0680713	0.0201469	-3.37876	0.000728148	0.476668	2349	451384	0.934194	CD2_INSITU_SKIN_FACE	CD2	Carcinoma in situ of skin of other and unspecified parts of face
0.0139469	0.00412794	3.37867	0.000728383	0.503929	68352	385381	1.01404	ST19_INJURI_KNEE_LOWER_LEG	ST19	Injuries to the knee and lower leg
0.0534322	0.0158167	3.37822	0.000729579	0.513484	3762	449971	1.05489	VWXY20_CONTACT_W_MACHINERY	VWXY20	Contact with machinery
0.0701031	0.0207553	3.37759	0.00073123	0.520083	1997	326530	1.07262	M13_DEQUERVAIN	M13	Radial styloid tenosynovitis [de Quervain]
0.0577917	0.0171146	3.37675	0.000733487	0.515104	3116	312465	1.05949	R18_FAECAL_INCONTINENCE	R18	Faecal incontinence
0.0628709	0.018635	3.3738	0.000741376	0.519449	2646	397865	1.06489	H8_OTALGIA	H8	Otalgia
0.059514	0.0176679	3.36847	0.000755854	0.518692	2944	438050	1.06132	L12_URTICA_ALLERG	L12	Allergic urticaria
-0.0394779	0.0117229	-3.3676	0.000758268	0.489813	7284	345118	0.961291	C3_COLORECTAL_ADENO_EXALLC	C3	Colorectal adenocarcinoma
0.0133412	0.00397234	3.35852	0.000783603	0.503173	78836	322557	1.01343	OTHER_ANTIDEPRESSANTS	RX	Other antidepressants
0.0467421	0.0139325	3.3549	0.000793939	0.515183	4769	443609	1.04785	AB1_CANDIDIASIS	AB1	Candidiasis
0.0629236	0.0187677	3.35276	0.000800101	0.516391	2547	445700	1.06495	M13_OSTEOCHONDROPATHY	M13	Other osteochondropathies
0.0559631	0.0167132	3.34843	0.000812705	0.515932	3226	450507	1.05756	CD2_BENIGN_STOMACH	CD2	Benign neoplasm: Stomach
-0.0346184	0.0103458	-3.34613	0.000819465	0.487598	8957	429396	0.965974	H7_IRIDOCYCLITIS	H7	Iridocyclitis
0.0539676	0.0161747	3.33653	0.000848308	0.516325	3495	422362	1.05545	R18_RASH_OTHER_NONSPECIFIC_SKIN_ERUPT	R18	Rash and other nonspecific skin eruption
0.115922	0.0348021	3.33089	0.000865696	0.530563	698	446969	1.12291	N14_ACUTENEPHRITIC	N14	Acute nephritic syndrome
0.154009	0.0462689	3.32857	0.00087293	0.551823	374	403864	1.1665	ST19_FAILU_REJEC_TRANSPLANTED_ORGANS_TISSU	ST19	Failure and rejection of transplanted organs and tissues
0.0401774	0.0120788	3.32627	0.000880169	0.509271	6658	447075	1.041	VWXY20_VAPAA_TAPATURMAT	VWXY20	Leisure time condition
0.0345321	0.0103873	3.32445	0.000885935	0.508315	8993	385082	1.03514	K11_OTHGASTR	K11	Other gastritis (incl. Duodenitis)
0.0687531	0.0206819	3.32432	0.000886345	0.514884	2104	394476	1.07117	L12_LICHSIMPANDPRURIGO	L12	Lichen simplex chronicus and prurigo
0.0305798	0.00921768	3.31752	0.000908216	0.504272	12447	441286	1.03105	PACEMAKER	I9	Pacemaker
0.0277683	0.0083748	3.3157	0.000914135	0.507499	14172	337881	1.02816	J10_SEPTDEV	J10	Deviated nasal septum
0.0547294	0.0165199	3.31294	0.000923193	0.51786	3312	326530	1.05625	M13_ENTESOPATHYNAS	M13	Other/unspecified enthesopathies, not elsewhere classified
0.062721	0.0189422	3.31117	0.000929059	0.51559	2479	446539	1.06473	RHINITIS_VASOMOTOR	ASTHMA	Vasomotor rhinitis (mode)
0.1129	0.0341009	3.31077	0.000930402	0.536097	733	452718	1.11952	D3_ACQHAEMOLYTICANAEMIA	D3	Acquired haemolytic anaemia
0.0287022	0.00867046	3.31035	0.000931802	0.503082	14063	412105	1.02912	I9_SEQULAE	I9	Sequelae of cerebrovascular disease
0.282042	0.0852867	3.30699	0.000943042	0.579867	100	443932	1.32583	E4_THYTOXFAC	E4	Thyrotoxicosis factitia
0.0921138	0.027884	3.30347	0.00095496	0.524171	1132	403936	1.09649	AB1_SEPSIS_FUNGAL	AB1	Fungal Sepsis
0.0368374	0.0111798	3.29501	0.000984193	0.512841	7839	401125	1.03752	ST19_SUPERF_INJURY_WRIST_HAND	ST19	Superficial injury of wrist and hand
0.0238508	0.0072389	3.29481	0.000984877	0.506305	18951	434113	1.02414	H7_VITRBODYGLOBE	H7	Disorders of vitreous body
0.248786	0.0756704	3.28776	0.00100989	0.584458	134	450646	1.28247	E4_HYPOCOMA	E4	Nondiabetic hypoglycaemic coma
0.0332035	0.0101214	3.28052	0.00103617	0.510179	10765	422407	1.03376	H8_NONSUPPNAS	H8	Nonsuppurative otitis media
0.0564775	0.0172631	3.27157	0.00106953	0.518025	3010	450723	1.0581	K11_PERIODON_CHRON_COMPL	K11	Chronic periodontitis, complicated
0.0388233	0.0118671	3.27152	0.00106973	0.5102	6820	443701	1.03959	IBD_BACT_INTEST_INFECTIONS	GASTRO	Bacterial intestinal infections, IBD co-morbidities
0.0154022	0.00470991	3.27017	0.00107484	0.503693	49869	403864	1.01552	ST19_COMPLICATIO_SURGI_MEDICAL_CARE_NOT_ELSEW_CLASSIFIED	ST19	Complications of surgical and medical care, not elsewhere classified
0.0544442	0.0166672	3.26655	0.00108866	0.516561	3392	119468	1.05595	N14_OTHNONINFVULV	N14	Other noninflammatory disorders of vulva and perineum
0.0355285	0.0108817	3.26497	0.00109474	0.50992	8033	429826	1.03617	M13_OTHERBONE	M13	Other disorders of bone
0.0507214	0.0155543	3.26092	0.00111053	0.513641	3790	326530	1.05203	M13_MUSCLE	M13	Disorders of muscles
0.115996	0.0356103	3.25738	0.00112445	0.53596	658	438050	1.12299	L12_URTICA_IDIOPAT	L12	Idiopathic urticaria
0.0804244	0.0246969	3.25645	0.00112814	0.523453	1464	441336	1.08375	I9_PULMOTHHD	I9	Other pulmonary heart/vessel disease
0.111021	0.0341389	3.25204	0.00114582	0.533402	716	446969	1.11742	N14_NEPHRITICNAS	N14	Unspecified nephritic syndrome
0.0440943	0.0135747	3.24826	0.00116114	0.508632	5890	300152	1.04508	WET_AMD	H7	Wet age-related macular degeneration
0.105643	0.0325239	3.24818	0.00116147	0.536198	777	423041	1.11143	L12_LUPUS	L12	Lupus erythematosus
0.0253734	0.00781454	3.24694	0.00116651	0.508738	16699	420112	1.0257	ST19_DISLO_SPRAIN_STRAIN_JOINTS_LIGAM_ANKLE_FOOT_LEVEL	ST19	Dislocation, sprain and strain of joints and ligaments at ankle and foot level
0.0174765	0.00538954	3.24266	0.00118418	0.503189	37567	322314	1.01763	M13_LOWBACKPAIN	M13	Low back pain
0.0644138	0.01989	3.23851	0.00120155	0.525067	2258	423041	1.06653	L12_SKINSUBCUTISNAS	L12	Other and unspecified disorders of skin and subcutaneous tissue
0.0194149	0.00600607	3.23255	0.00122693	0.506268	30025	288472	1.0196	K11_TEETH_HARD	K11	Other diseases of hard tissues of teeth
0.023026	0.00712941	3.22973	0.00123909	0.505818	19620	434113	1.02329	H7_VITREOUS	H7	Disorders of vitreous body and globe
0.0325568	0.0100829	3.22892	0.0012426	0.5089	9695	312465	1.03309	R18_DYSPHAGIA	R18	Dysphagia
0.024025	0.00744541	3.22681	0.00125177	0.506068	18833	314967	1.02432	R18_COUGH	R18	Cough
0.0279277	0.00865503	3.22676	0.001252	0.508833	14360	382065	1.02832	Z21_FIT_ADJ_OTH_DEVICES	Z21	Fitting and adjustment of other devices
0.0610777	0.0189331	3.22597	0.00125547	0.517294	2456	451277	1.06298	OPER_SHA03	DENTAL	Correction of physiology of bite - demanding therapy visit
0.125568	0.0389319	3.22533	0.00125828	0.533156	562	453171	1.13379	AB1_HELMINTIASES	AB1	Helminthiases
-0.0294136	0.00913468	-3.21999	0.00128193	0.490819	11784	337970	0.971015	CD2_BENIGN_MELANOCYTIC_EXALLC	CD2	Melanocytic naevi
0.174559	0.054215	3.21976	0.00128297	0.554441	270	413784	1.19072	H7_RETINALDETACHTRACTION	H7	Traction detachment of retina
0.0390212	0.0121335	3.21598	0.00129998	0.507443	6696	447037	1.03979	I9_STEMI	I9	Myocardial infarction, with ST-elevation
0.0569406	0.0177063	3.21584	0.00130065	0.51898	2848	326530	1.05859	M13_SPONTRUPTSYNOTEND	M13	Spontaneous rupture of synovium and tendon
-0.0692237	0.0215675	-3.20962	0.00132908	0.478205	1885	443932	0.933118	E4_THYTOXGOITMULT	E4	Thyrotoxicosis with toxic multinodular goitre
0.0736093	0.0229467	3.20784	0.00133736	0.519732	1728	312465	1.07639	R18_UNSPE_JAUND	R18	Unspecified jaundice
-0.105974	0.0331048	-3.20116	0.00136878	0.460145	805	452928	0.899448	CD2_INSITU_SKIN_TRUNK	CD2	Carcinoma in situ of skin of trunk
0.0307383	0.00960339	3.20078	0.00137056	0.500641	16902	199505	1.03122	G6_AD_WIDE_EXMORE	G6	Alzheimer‚Äôs disease, wide definition
0.0311492	0.00973526	3.19963	0.00137605	0.507215	10350	194563	1.03164	O15_PRETERM	O15	Preterm labour and delivery
0.0824345	0.0257849	3.197	0.00138863	0.521382	1383	428053	1.08593	F5_DEMINOTH	F5	Dementia in other diseases classified elsewhere
0.0418963	0.0131228	3.19264	0.00140978	0.510198	5540	434885	1.04279	ST19_SUPERF_INJURY_THORAX	ST19	Superficial injury of thorax
0.0313558	0.00982371	3.19185	0.00141367	0.507828	10261	443472	1.03185	ST19_POISO_DRUGS_MEDICAM_BIOLO_SUBST	ST19	Poisoning by drugs, medicaments and biological substances
0.0226972	0.00711553	3.18981	0.00142366	0.503939	21617	372627	1.02296	J10_COPD	J10	COPD
0.208393	0.0653398	3.18937	0.00142585	0.555989	179	366945	1.2317	ILD_NINTENDANIB	RX	ILD medications: nintedanib
0.0243896	0.0076502	3.1881	0.0014321	0.504991	16895	435504	1.02469	R18_MOUTH_BREAT	R18	Mouth breathing
0.0578608	0.01815	3.18792	0.00143298	0.514717	2770	385082	1.05957	K11_ACUTGASTR	K11	Acute gastritis
0.0978799	0.0307302	3.18514	0.00144683	0.522677	917	448636	1.10283	ILD_INSUFFICIENCY	ILD	ILD-related respiratory insufficiency
0.0241914	0.00759707	3.18431	0.001451	0.504056	17791	412885	1.02449	H7_EYELIDDIS	H7	Other disorders of eyelid
0.204375	0.0641833	3.18425	0.00145131	0.582032	188	423041	1.22676	L12_NECROLIPOIDIC	L12	Necrobiosis lipoidica, not elsewhere classified
0.0472421	0.0148779	3.17532	0.00149672	0.507056	4692	199772	1.04838	PDSTRICT_EXMORE	NEURO	Parkinson's disease, strict definition
0.0550243	0.0173726	3.1673	0.00153864	0.510537	3228	378141	1.05657	E4_FH_IHD	E4	Familial hypercholesterolemia, with ischemic heart disease
0.136807	0.0431979	3.16698	0.00154029	0.543243	439	439424	1.14661	M13_POLYARTERETAL	M13	Polyarteritis nodosa and related conditions
0.198093	0.0625643	3.16623	0.00154429	0.567332	197	446523	1.21908	D3_CVID	D3	Common variable immunodeficiency
0.0303686	0.00959495	3.16506	0.00155052	0.507057	10575	387841	1.03083	K11_UMBHER	K11	Umbilical hernia
0.0539687	0.017073	3.16106	0.00157199	0.516615	3373	141300	1.05545	N14_OTHPENIS	N14	Other disorders of penis
0.0769798	0.0243555	3.16067	0.00157407	0.521403	1470	448864	1.08002	CHIRHEP_NAS	GASTRO	Cirrhosis of liver, NAS
0.118726	0.0375865	3.15874	0.00158455	0.535411	585	427599	1.12606	K11_CHOLANGI_STRICT	GASTRO	Cholangitis (primary sclerosing, PSC), with reimbursement 202
0.0200684	0.00637374	3.1486	0.00164054	0.505087	25116	428617	1.02027	VWXY20_SURGI_OPERA_OTHER_SURGI_PROCED_CAUSE_ABNORMAL_REACTION_PATIENT_COMPLICATION_WO_MENTION_MISAD_TIME_PROCED	VWXY20	Surgical operation and other surgical procedures as the cause of abnormal reaction of the patient, or of later complication, without mention of misadventure at the time of the procedure
0.0253449	0.00804998	3.14844	0.00164146	0.50552	18117	250671	1.02567	COPD_MODE	ASTHMA	COPD (mode)
0.0198351	0.00631693	3.14	0.00168949	0.504236	26964	392505	1.02003	ST19_INTRACR_INJURY	ST19	Intracranial injury
0.0473479	0.0150987	3.13589	0.00171335	0.512647	4049	429396	1.04849	H7_KERATITISOTH	H7	Other keratitis
0.0222088	0.00708549	3.1344	0.00172204	0.504741	20424	433309	1.02246	CD2_BENIGN_COLON	CD2	Benign neoplasm: Colon
0.0361136	0.0115294	3.13232	0.00173433	0.508156	7360	436208	1.03677	N14_ACUTERENFAIL	N14	Acute renal failure
0.0271993	0.00869903	3.1267	0.0017678	0.502542	16347	249893	1.02757	NEURODEGOTH	GASTRO	Other degenerative diseases of the nervous system
0.213865	0.0685362	3.12047	0.00180564	0.574403	157	439424	1.23846	M13_DERMATOMYOTH	M13	Other dermatomyositis
0.31319	0.100443	3.1181	0.00182022	0.60373	74	453659	1.36778	VWXY20_EXPOS_IGNIT_MELTI_OTHER_CLOTH_APPAREL	VWXY20	Exposure to ignition or melting of other clothing and apparel
0.0394581	0.012668	3.11479	0.00184078	0.510438	5949	433007	1.04025	D3_ANAEMIA_IRONDEF_BLOODLOSS	D3	Iron deficiency anaemia secondary to blood loss (chronic)
0.158416	0.0508762	3.11375	0.00184729	0.554835	312	312465	1.17165	R18_HEPATOM_SPLENO_NOT_ELSEW_CLASSIFIED	R18	Hepatomegaly and splenomegaly, not elsewhere classified
0.0332271	0.0107006	3.10516	0.00190176	0.509865	8626	215354	1.03379	O15_PREG_MATERN_CARE	O15	Maternal care for other conditions predominantly related to pregnancy
0.0190666	0.00615475	3.09786	0.00194923	0.50497	27450	426283	1.01925	R18_ABNORMAL_FINDI_DIAGNOST_IMAGI_FUNCTION_STUDI_WO_DIAGNOSIS	R18	Abnormal findings on diagnostic imaging and in function studies, without diagnosis
0.0296026	0.00957335	3.09219	0.00198687	0.506924	10553	431119	1.03005	H8_BPV	H8	Benign paroxysmal vertigo
0.294484	0.0956824	3.07773	0.00208585	0.639402	75	385630	1.34243	E4_THYCRISIS	E4	Thyroid crisis or storm
0.049396	0.0160668	3.07441	0.00210919	0.507803	3827	428053	1.05064	F5_DELIRIUM	F5	Delirium, not induced by alcohol and other psychoactive substances
0.022142	0.00720654	3.07249	0.00212279	0.504073	20623	433110	1.02239	COPD_EARLYANDLATER	COPD	COPD, early/later onset
0.121933	0.0398478	3.05996	0.00221366	0.538301	509	453224	1.12968	DRUGADVERS_ADRENOCORTICAL_INSUFFICIENCY	E4	Drug-induced adrenocortical insufficiency
0.0590608	0.0193075	3.05897	0.00222103	0.515509	451113	2620	1.06084	ANY_ATC	SHARED	Any prescribed medicine buy
0.0561594	0.0183665	3.05771	0.00223034	0.515736	2814	448592	1.05777	J10_PNEUMONISOLLIQ	J10	Pneumonitis due to solids and liquids
0.0846056	0.0277739	3.04623	0.00231733	0.527642	1123	440301	1.08829	K11_HEPFAIL	K11	Hepatic failure, not elsewhere classified
0.0238988	0.00785653	3.0419	0.00235092	0.50846	18610	105370	1.02419	K11_ATTRITION	K11	Excessive attrition of teeth
-0.0468252	0.0154387	-3.03298	0.00242149	0.488618	3932	345118	0.954254	C3_MELANOMA_SKIN_EXALLC	C3	Malignant melanoma of skin
0.0415067	0.0136942	3.03098	0.00243765	0.507853	5028	448705	1.04238	VWXY20_MUUT_TAPATURMAT	VWXY20	Other condition
0.138039	0.045562	3.0297	0.00244795	0.546307	386	440367	1.14802	AB1_LATE_SYPHILIS	AB1	Late syphilis
0.0498436	0.016459	3.02835	0.00245895	0.509774	3365	450368	1.05111	AB1_ARTHROPOD	AB1	Arthropod-borne viral fevers and viral haemorrhagic fevers
0.0312571	0.0103654	3.01552	0.00256536	0.507517	9165	443472	1.03175	ST19_POISO_MEDICI	ST19	Poisoning by medicine
0.067862	0.0225391	3.01085	0.00260516	0.520873	1687	395832	1.07022	G6_ATYFAC	G6	Atypical facial pain
0.0549083	0.0182396	3.01039	0.00260911	0.511336	2709	450368	1.05644	AB1_VIRAL_HEMOR_FEVER_NOS	AB1	Viral haemorrhagic fevers, not elsewhere classified/unspecified
-0.0406796	0.0135347	-3.00557	0.0026508	0.488588	5122	448611	0.960137	C3_MELANOMA	C3	Malignant melanoma
0.177125	0.0589919	3.00254	0.00267738	0.560826	218	453515	1.19378	NASH	GASTRO	Nonalcoholic steatohepatitis
-0.0851755	0.0284501	-2.99385	0.00275479	0.469042	1070	345118	0.918351	C3_BRAIN_EXALLC	C3	Malignant neoplasm of brain
0.0472879	0.0158045	2.99205	0.00277113	0.513627	3547	326530	1.04842	M13_PLANTARFASC	M13	Plantar fascial fibromatosis
0.0917716	0.0307347	2.98593	0.00282717	0.52558	913	384093	1.09611	E4_LACTONAS	E4	Lactose intolerance, other/unspecified
-0.0466469	0.0156232	-2.98576	0.00282878	0.484021	4078	449655	0.954424	C3_SQUOMOUS_CELL_CARCINOMA_SKIN	C3	Squamous cell neoplasms and carcinomas of the skin
0.0318572	0.0106827	2.98212	0.00286258	0.506329	8923	420324	1.03237	I9_AORTANEUR	I9	Aortic aneurysm
0.042559	0.014291	2.97803	0.00290112	0.510333	4568	432149	1.04348	H7_DIPLOPIA	H7	Diplopia
0.0423552	0.0142333	2.97578	0.00292243	0.506039	5150	199772	1.04326	G6_PARKINSON_EXMORE	G6	Parkinson's disease
0.0591701	0.0198895	2.97494	0.00293049	0.517843	2295	446531	1.06096	D3_THROMBOCYTOPENIANAS	D3	Thrombocytopenia, unspecified
0.0357513	0.0120241	2.97331	0.00294605	0.513261	6575	312465	1.0364	R18_OTHER_SYMPTOMS_SIGNS_INVOLVI_DIGES_SYSTEM_ABDOMEN	R18	Other symptoms and signs involving the digestive system and abdomen
0.0559242	0.01883	2.96995	0.00297849	0.517582	2661	241998	1.05752	E4_OVARDYS	E4	Ovarian dysfunction
0.105202	0.0354282	2.96945	0.00298335	0.528834	698	440344	1.11094	G6_DEGENOTH	G6	Other and unspecified degenerative diseases of nervous system
0.0162077	0.00545837	2.96934	0.00298444	0.505481	36160	413573	1.01634	H7_CONJUNCTIVITIS	H7	Conjunctivitis
0.0803719	0.0270677	2.96929	0.00298486	0.523951	1173	429396	1.08369	H7_KERATITISINOTH	H7	Keratitis and keratoconjunctivitis in other diseases classified elsewhere
0.0196774	0.00663209	2.967	0.00300721	0.503707	24579	429154	1.01987	J10_COPDNAS_INCLAVO	J10	Other chronic obstructive pulmonary disease
0.0467129	0.0157497	2.96595	0.00301746	0.513261	3735	312465	1.04782	R18_HEARTBURN	R18	Heartburn
0.0251332	0.00847761	2.96466	0.0030302	0.504718	14089	341884	1.02545	G6_EPLEPSY	G6	Epilepsy
0.0190871	0.00644518	2.96145	0.00306198	0.50408	25190	428543	1.01927	CD2_BENIGN_COLORECANI	CD2	Benign neoplasm of colon, rectum, anus and anal canal
-0.0659347	0.0222729	-2.96031	0.00307327	0.476514	1765	322314	0.936192	M13_SACROILIITIS	M13	Sacroiliitis, not elsewhere classified
0.0301198	0.0101975	2.95364	0.00314052	0.508962	9225	432149	1.03058	H7_VISUDISTURBSUB	H7	Subjective visual disturbances
0.058904	0.0199497	2.95263	0.00315077	0.515766	2368	236510	1.06067	F5_DEPRESSION_PSYCHOTIC	F5	Psychotic depression
0.060043	0.0203391	2.9521	0.00315618	0.517357	2206	426987	1.06188	L12_LYMPHADENITIS	L12	Acute lymphadenitis
0.039769	0.0134852	2.94909	0.00318709	0.508841	5380	433177	1.04057	ST19_SUPERF_INJURY_HIP_THIGH	ST19	Superficial injury of hip and thigh
0.0136821	0.00464339	2.94657	0.00321322	0.504737	52608	401125	1.01378	ST19_INJURI_WRIST_HAND	ST19	Injuries to the wrist and hand
0.0207349	0.00704534	2.94307	0.00324977	0.501348	23945	429788	1.02095	I9_K_CARDIAC	I9	Death due to cardiac causes
0.0369904	0.0125726	2.94214	0.0032595	0.51022	5949	445700	1.03768	M13_CHRONDROPATHIES	M13	Chondropathies
0.0485246	0.0164983	2.94119	0.00326951	0.514314	3330	440301	1.04972	K11_ALCOLIV	K11	Alcoholic liver disease
0.132874	0.045177	2.94118	0.00326963	0.541962	385	441605	1.14211	DIS_THYROID_OTH	GASTRO	Other disorders of thyroid
-0.0447731	0.0152507	-2.93581	0.00332678	0.488648	3974	242261	0.956214	N14_ENDOMET_INFERT	N14	Endometriosis diagnosis and infertility diagnosis occurring together
0.0213675	0.00728183	2.93436	0.00334233	0.503711	20101	433632	1.0216	COPD_HOSPITAL	COPD	COPD, hospital admissions
0.021697	0.00740414	2.93039	0.00338534	0.503455	18808	434925	1.02193	R18_ABNORMAL_FINDI_EXAMI_BLOOD_WO_DIAGNOSIS	R18	Abnormal findings on examination of blood, without diagnosis
0.0985869	0.033648	2.92995	0.0033902	0.526166	754	438050	1.10361	L12_ERYTHEMAMULTIF	L12	Erythema multiforme
0.0473886	0.016212	2.92306	0.00346605	0.515013	3437	444295	1.04853	ST19_SEQUEL_INJURI_LOWER_LIMB	ST19	Sequelae of injuries of lower limb
-0.0397266	0.013612	-2.91849	0.00351729	0.489307	5284	345118	0.961052	C3_COLON_EXALLC	C3	Malignant neoplasm of colon
0.0166953	0.00572155	2.91797	0.00352319	0.504782	32232	385082	1.01684	K11_REFLUX	K11	Gastro-oesophageal reflux disease
0.0746492	0.0255997	2.91602	0.00354524	0.519648	1381	249893	1.07751	ST19_DIFFU_BRAIN_INJURY	ST19	Diffuse brain injury
-0.0231783	0.00798804	-2.90163	0.0037123	0.494117	17505	119468	0.977088	N14_POLYPFEMGEN	N14	Polyp of the female genital tract
0.339979	0.117242	2.89982	0.00373379	0.615666	52	453075	1.40492	CMV_PNEUMONIA	AB1	Cytomegaloviral pneumonitis
0.0811175	0.0280715	2.88967	0.00385644	0.523312	1105	432955	1.0845	H7_VERTISTRAB	H7	Vertical strabismus
0.0464786	0.0160872	2.88916	0.00386269	0.512916	3446	326530	1.04758	M13_METATARSALGIA	M13	Metatarsalgia
0.0857176	0.029695	2.8866	0.00389424	0.523911	1005	452728	1.0895	C3_LIVER_INTRAHEPATIC_BILE_DUCTS	C3	Malignant neoplasm of liver and intrahepatic bile ducts
-0.0365776	0.0126803	-2.88459	0.00391924	0.489629	5623	448110	0.964083	RX_L02BA	RX	L02BA Anti-estrogens
-0.0724244	0.0251152	-2.88368	0.00393053	0.47408	1400	345118	0.930136	C3_EYE_BRAIN_NEURO_EXALLC	C3	Malignant neoplasm of eye, brain and central nervous system
0.158026	0.0548158	2.88286	0.00394079	0.54491	267	366945	1.1712	ILD_PIRFENIDONE	RX	ILD medications: pirfenidone
0.300828	0.104597	2.87606	0.00402673	0.621663	64	451899	1.35098	L12_PEMPHIGOID_CICA	L12	Cicatricial pemphigoid
0.0473935	0.0165005	2.87224	0.00407571	0.513691	3330	450403	1.04853	ALCOLIVER	ALCO	Alcoholic liver disease
0.0482959	0.0168217	2.87104	0.00409121	0.510403	3221	450512	1.04948	VWXY20_OTHER_MEDICAL_PROCED_CAUSE_ABNORMAL_REACTION_PATIENT_COMPLICATION_WO_MENTION_MISAD_TIME_PROCED	VWXY20	Other medical procedures as the cause of abnormal reaction of the patient, or of later complication, without mention of misadventure at the time of the procedure
0.0215922	0.00752642	2.86886	0.00411957	0.5033	18491	435242	1.02183	J10_PLEURA	J10	Other diseases of pleura
0.163975	0.0571605	2.86868	0.00412185	0.545547	241	434925	1.17819	R18_ABNORMALITY_WHITE_BLOOD_CELLS_NOT_ELSEW_CLASSIFIED	R18	Abnormality of white blood cells, not elsewhere classified
0.164317	0.057378	2.86376	0.00418652	0.551881	236	424573	1.17859	E4_NUTRI_DEF_NAS	E4	Other specified/unspecified nutritional deficiencies
0.0175958	0.00615103	2.86062	0.00422816	0.505316	27076	415845	1.01775	APPENDACUT_NOCOMPLIC	K11	Acute appendicitis, no complications
0.0431759	0.0150945	2.86037	0.00423152	0.509494	4080	341884	1.04412	G6_SLEEPDISOTH	G6	Other sleep disorders
0.233288	0.0817778	2.8527	0.00433492	0.567701	116	429396	1.26274	H7_IRISCILIARYNAS	H7	Other specified and unspecified disorders of iris and ciliary body
0.0266695	0.0093562	2.85046	0.00436558	0.508344	11295	413573	1.02703	H7_CONJUNCTIVITISACUNONATOPIC	H7	Conjunctivitis (acute, non atopic)
0.0169992	0.00596381	2.85039	0.00436651	0.502394	29524	326530	1.01714	M13_ROTATORCUFF	M13	Rotator cuff syndrome
0.030754	0.0108089	2.84524	0.0044378	0.509178	8104	415845	1.03123	APPENDACUT_COMPLIC	K11	Acute appendicitis, with complications
0.191387	0.0673226	2.84284	0.00447138	0.560178	168	445490	1.21093	D3_INFARCTSPLEEN	D3	Infarction of spleen
0.0348923	0.0122841	2.84043	0.00450521	0.504946	6322	384681	1.03551	GLUCLOW_OTH	RX	Other blood glucose lowering drugs, excl. Insulins
0.0430534	0.0151921	2.83394	0.00459786	0.511173	3908	432686	1.04399	L12_ROSACEA	L12	Rosacea
0.0307596	0.0108666	2.83065	0.00464536	0.506125	8229	403864	1.03124	ST19_COMPLICATIO_INTERNAL_ORTHOPA_PROSTHET_DEVICES_IMPLANTS_GRAFTS	ST19	Complications of internal orthopaedic prosthetic devices, implants and grafts
0.0502163	0.0177445	2.82997	0.00465526	0.512307	2853	234147	1.0515	O15_EXIST_HYPERT_COMPLIC	O15	Pre-existing hypertension complicating pregnancy, childbirth and the puerperium
0.0507444	0.0179771	2.82273	0.00476174	0.513518	2825	397583	1.05205	K11_BILIAOTH	K11	Other diseases of biliary tract
0.103465	0.0366626	2.82209	0.00477116	0.531394	601	423041	1.10901	L12_LOCALDCONNECTISSUEOTH	L12	Other localized connective tissue disorders
0.0502467	0.0178138	2.82066	0.00479248	0.511529	2885	432149	1.05153	H7_VISFIELDDEF	H7	Visual field defects
0.0664339	0.0235582	2.81999	0.00480257	0.522933	1580	452153	1.06869	D3_IMMUDEF	D3	Immunodeficiencies
0.0194502	0.00689957	2.81905	0.00481665	0.501345	25372	342690	1.01964	I9_VHD	I9	Valvular heart disease excluding rheumatic fever
0.019167	0.00682331	2.80905	0.00496886	0.505168	23414	265984	1.01935	VWXY20_TRANSPO_ACCIDENTS	VWXY20	Transport accidents
0.0150305	0.0053542	2.80725	0.00499672	0.50299	41021	368973	1.01514	N14_URETHRAOTH	N14	Other disorders of urethra and urinary system
0.045261	0.0161463	2.80319	0.00506004	0.512402	3450	326530	1.0463	M13_SHOULDERNAS	M13	Other shoulder lesions
0.0343451	0.0122564	2.8022	0.00507547	0.508789	6205	447528	1.03494	CD2_BENIGN_OTHERDIGESTIVE	CD2	Benign neoplasm of other and ill-defined parts of digestive system
0.019389	0.00691969	2.80201	0.00507853	0.506164	21353	432380	1.01958	K11_ENERCOLNONINF	K11	Noninfective enteritis and colitis
0.0545563	0.0194868	2.79966	0.00511568	0.514059	2350	397583	1.05607	K11_PANCOTH	K11	Other diseases of pancreas
0.181308	0.0648139	2.79736	0.00515221	0.560812	180	326530	1.19878	M13_ABSCTENDON	M13	Abscess of tendon sheath
0.150595	0.0539089	2.79351	0.00521396	0.547894	277	316345	1.16253	I9_HYPTENSPUL	I9	Hypertension, Pulmonary Arterial
0.0811441	0.0291317	2.78543	0.00534574	0.521425	1031	446531	1.08453	D3_ALLERGPURPURA	D3	Allergic purpura
0.0383201	0.0137585	2.78519	0.00534963	0.510352	5011	448722	1.03906	VWXY20_ASSAULT	VWXY20	Assault
0.046306	0.0166356	2.78354	0.00537686	0.50839	3366	372627	1.04739	J10_BRONCH	J10	Bronchitis, not specified as acute or chronic
0.0561393	0.0201815	2.78171	0.00540726	0.52176	2186	451547	1.05775	OPER_SGA	DENTAL	Opening and dilatation of root channel of tooth
-0.0922906	0.0331869	-2.78093	0.00542027	0.461402	779	344618	0.91184	CD2_BENIGN_MELANOCYTIC_SCALPNECK_EXALLC	CD2	Melanocytic naevi of scalp and neck
0.0271562	0.00978899	2.77416	0.00553449	0.504112	10703	433632	1.02753	COPD_HOSPITAL_ASTHMA_PNEUM_SEPSIS	COPD	COPD, hospital admissions 3, with asthma pneumonia sepsis
0.0604996	0.0218152	2.77328	0.00554944	0.519557	1866	423041	1.06237	L12_HYPETROPHICSCAR	L12	Hypertrophic scar
0.0520484	0.0187685	2.77317	0.00555125	0.51083	2597	372627	1.05343	J10_BRONCHIECTASIS	J10	Bronchiectasis
0.0251244	0.00906335	2.77209	0.00556979	0.508602	12011	401125	1.02544	ST19_DISLO_SPRAIN_STRAIN_JOINTS_LIGAM_WRIST_HAND_LEVEL	ST19	Dislocation, sprain and strain of joints and ligaments at wrist and hand level
0.0781944	0.0282263	2.77027	0.00560103	0.520835	1149	333607	1.08133	R18_HAEMORRHAGE_NOT_ELSEW_CLASSIFIED	R18	Haemorrhage, not elsewhere classified
0.194871	0.0703656	2.76941	0.00561572	0.559511	157	453576	1.21515	VWXY20_EXPOS_OTHER_UNSPE_FORCES_NATURE	VWXY20	Exposure to other and unspecified forces of nature
0.0270618	0.00977806	2.76761	0.00564694	0.506084	10403	360393	1.02743	K11_ILEUS	K11	Paralytic ileus and intestinal obstruction
0.0964062	0.0348346	2.76754	0.00564807	0.523691	718	394476	1.10121	L12_ERYT_INTERTRIG	L12	Erythema intertrigo
0.0330642	0.011958	2.76502	0.0056919	0.506185	6872	442845	1.03362	GOUT_NOS	RHEUMA	Gout, unspecified
0.0246482	0.00892221	2.76257	0.00573479	0.504008	12937	433632	1.02495	COPD_HOSPITAL_ASTHMA_INF	COPD	COPD, hospital admission 2, with asthma infections
0.0902057	0.0326592	2.76203	0.00574436	0.520794	823	429396	1.0944	H7_OTHIRISCILIARY	H7	Other disorders of iris and ciliary body
-0.0510305	0.0184769	-2.76186	0.00574733	0.486685	2651	201449	0.95025	CD2_INSITU_BREAST_INTRADUCTAL_EXALLC	CD2	Carcinoma in situ of breast, intraductal
-0.0378291	0.0136973	-2.76179	0.00574856	0.486438	5099	233585	0.962877	N14_BENIGNMAMDYSP	N14	Benign mammary dysplasia
0.0579994	0.0210054	2.76117	0.00575953	0.518458	2019	423041	1.05971	L12_HYPERTROPHICSKIN	L12	Hypertrophic disorders of skin
0.0190967	0.00692196	2.75886	0.0058003	0.50121	25200	342690	1.01928	I9_NONRHEVALV	I9	Non-rheumatic valve diseases
0.0375558	0.0136189	2.75763	0.00582228	0.510359	5099	432380	1.03827	COLITNONINFNAS	GASTRO	Noninfectious colitis NAS
-0.0782716	0.0284185	-2.75425	0.00588276	0.471232	1070	452663	0.924713	C3_BRAIN	C3	Malignant neoplasm of brain
0.1118	0.0406518	2.75019	0.00595607	0.534666	531	443472	1.11829	ST19_POISO_NARCOT_PSYCHOD_HALLUCINOG	ST19	Poisoning by narcotics and psychodysleptics [hallucinogens]
0.0754873	0.0274517	2.74982	0.00596277	0.519253	1179	420324	1.07841	I9_VASCINT	I9	Vascular diseases of the intestine
0.0578514	0.0210493	2.74838	0.00598902	0.519484	1973	395832	1.05956	G6_TRINEU	G6	Trigeminal neuralgia
0.0317629	0.0115812	2.74263	0.00609494	0.502335	6982	395832	1.03227	G6_ROOTPLEXOTHUNS	G6	Other and unspecified nerve root and plexus disorders, also in other diseases
0.109262	0.039893	2.73888	0.00616496	0.534361	519	440335	1.11545	H8_EXT_NONINF	H8	Acute otitis externa, noninfective
0.132	0.048222	2.73735	0.0061936	0.542928	348	452718	1.14111	D3_AIHA_OTHER	D3	Other autoimmune haemolytic anaemias
0.0309877	0.0113373	2.73325	0.00627121	0.508245	7511	446222	1.03147	VWXY20_OCCUPANT_INJURED_OTHER_UNSPE_TRANSPO_ACCIDENTS	VWXY20	Car occupant injured in other and unspecified transport accidents
-0.0533854	0.019536	-2.73267	0.00628234	0.484084	2574	345118	0.948015	C3_BLADDER_EXALLC	C3	Malignant neoplasm of bladder
0.057648	0.0210974	2.73247	0.00628614	0.513692	2155	238922	1.05934	ASTHMA_MIXED_EXMORE	ASTHMA	Asthma mixed form (mode)
0.031736	0.0116227	2.73052	0.00632352	0.506592	7178	439644	1.03224	FE_MODE	G6	Focal epilepsy, mode (most common among epilepsy diagnosis)
0.0461589	0.0169233	2.72754	0.00638092	0.511444	3208	420324	1.04724	I9_ARTOTH	I9	Other diseases of arteries and capillaries
0.0316242	0.0116044	2.72519	0.00642641	0.507062	7048	429396	1.03213	H7_CORNULCER	H7	Corneal ulcer
0.0142074	0.00521528	2.72419	0.00644597	0.503378	39236	403864	1.01431	ST19_COMPLICATIO_PROCED_NOT_ELSEW_CLASSIFIED	ST19	Complications of procedures, not elsewhere classified
0.0379909	0.0139576	2.72187	0.00649135	0.512081	5579	448154	1.03872	K11_PULPITIS_3	K11	Dental pulpitis 3
0.0637567	0.0234434	2.71961	0.00653598	0.514444	1709	252661	1.06583	OSTPOPATFRCTURE_POSTEMENO	RHEUMA	Postmenopausal osteoporosis with pathological fracture
0.0791517	0.0291208	2.71804	0.00656697	0.524168	1038	420324	1.08237	I9_AORTDIS	I9	Dissection of aorta
0.0126979	0.00467622	2.71541	0.00661928	0.501042	55868	397865	1.01278	H8_OTHEREAR	H8	Other disorders of ear
0.0934228	0.0344185	2.71431	0.00664131	0.521319	732	450259	1.09793	AMPUTATION_FOOT	DIAB	Amputation of foot
-0.0456224	0.0168258	-2.71146	0.00669881	0.486478	3318	345118	0.955403	C3_URINARY_TRACT_EXALLC	C3	Malignant neoplasm of urinary organs
0.0384712	0.0141945	2.7103	0.00672228	0.510241	4678	449055	1.03922	K11_APHTA_RECUR_INCLAVO	K11	Recurring oral aphthae, including avohilmo
0.0418858	0.0154557	2.71006	0.00672717	0.511531	3752	326530	1.04278	M13_ENTESOPATHYFOOT	M13	Other enthesopathy of foot (+metatarsalgia)
0.0491164	0.0181334	2.70862	0.0067564	0.512286	2838	442845	1.05034	GOUT_IDIO	RHEUMA	Idiopathic gout
0.069277	0.0256297	2.703	0.00687163	0.522491	1340	384093	1.07173	E4_HYPERLIPMIX	E4	Mixed hyperlipidaemia
0.28208	0.104513	2.699	0.00695483	0.601608	65	451769	1.32589	AB1_OTHER_INFESTATIONS	AB1	Other infestations
0.0675381	0.0250284	2.69846	0.00696607	0.517396	1398	401589	1.06987	ASTHMA_OPPORTUNIST_INFECTIONS	ASTHMA	Asthma and opportunity respiratory infection
0.0359487	0.0133485	2.6931	0.00707918	0.50896	5155	395832	1.0366	G6_ULLNLE	G6	Lesion of ulnar nerve
0.0395548	0.0146896	2.69271	0.00708737	0.510264	4270	395832	1.04035	G6_BELLPA	G6	Bell's palsy
0.0551592	0.020496	2.69122	0.00711912	0.512533	2218	360393	1.05671	K11_VASCINT	K11	Vascular disorders of the intestines
0.200271	0.0745198	2.68749	0.00719909	0.568945	140	413784	1.22173	H7_PROLIFRETINOPATHOTH	H7	Other proliferative retinopathy
0.0684254	0.0254877	2.68464	0.00726078	0.521343	1373	372627	1.07082	J10_BRONCHNAS	J10	Unspecified chronic bronchitis
0.0226492	0.00848754	2.66852	0.00761858	0.504154	14347	439386	1.02291	COPD_HOSPITAL_MAIN	COPD	COPD, hospital admissions 1, only main diagnosis
0.0323641	0.0121284	2.66847	0.00761984	0.505415	6622	287796	1.03289	M13_HAMMERTOE	M13	Other hammer toe(s) (acquired)
0.0670904	0.0252226	2.65994	0.00781557	0.520752	1369	452364	1.06939	OPER_JFH	GASTRO	Total colectomy
0.0670904	0.0252226	2.65994	0.00781557	0.520752	1369	452364	1.06939	OPER_TOTAL_COLECTOMY	GASTRO	Total colectomy operation
0.0730494	0.0275093	2.65544	0.00792053	0.520005	1239	397685	1.07578	R18_OTHER_SYMPTOMS_SIGNS_INVOLVI_GENERAL_SENSA_PERCEP	R18	Other symptoms and signs involving general sensations and perceptions
0.0558352	0.0210501	2.6525	0.0079899	0.513561	2155	248261	1.05742	ASTHMA_MIXED	ASTHMA	Asthma mixed form (mode)
-0.145099	0.0547188	-2.65172	0.00800818	0.444828	276	432149	0.864937	H7_BLINDMONOCULAR	H7	Blindness, monocular
0.224516	0.0848674	2.64549	0.00815725	0.584516	103	446523	1.25172	D3_CVIDNAS	D3	Other or unspecified common variable immunodeficiency
0.084899	0.0321015	2.6447	0.0081763	0.51935	833	387841	1.08861	FEMHER_UNILATERAL	K11	Femoral hernia, unilateral
0.084899	0.0321015	2.6447	0.0081763	0.51935	833	387841	1.08861	FEMNINGHER_UNILATERAL	K11	Inguinal of femoral hernia, unilateral
0.084899	0.0321015	2.6447	0.0081763	0.51935	833	387841	1.08861	HERING_UNILATERAL	K11	Inguinal hernia, unilateral
0.037311	0.014113	2.64374	0.00819959	0.50814	4716	428037	1.03802	R18_ABNORMAL_INVOLU_MOVEM	R18	Abnormal involuntary movements
0.0265457	0.0100588	2.63905	0.00831396	0.506582	9438	444295	1.0269	ST19_SEQUEL_INJURI_POISO_OTHER_CONSE_EXTER_CAUSES	ST19	Sequelae of injuries, of poisoning and of other consequences of external causes
0.0250804	0.00950419	2.63888	0.00831805	0.505364	10968	442765	1.0254	H7_STRABISMUS	H7	Strabismus
-0.0413181	0.0156593	-2.63858	0.00832549	0.484627	3862	343230	0.959524	CD2_BENIGN_SKIN_FACE_EXALLC	CD2	Benign neoplasm: Skin of other and unspecified parts of face
0.0539967	0.0204898	2.6353	0.00840633	0.517106	2141	440335	1.05548	H8_EXT_OTH	H8	Other otitis externa (chronic)
0.0754197	0.0286816	2.62955	0.00854972	0.523944	1058	452675	1.07834	VWXY20_BITTEN_STUNG_NONVENO_INSECT_OTHER_NONVENO_ARTHROPODS	VWXY20	Bitten or stung by nonvenomous insect and other nonvenomous arthropods
0.0794372	0.0302612	2.62505	0.0086636	0.524494	907	452826	1.08268	OPER_SHA04	DENTAL	Correction of physiology of bite - very demanding therapy visit
-0.00955985	0.00364745	-2.62097	0.00876803	0.498051	121975	265664	0.990486	CD2_BENIGN_EXALLC	CD2	Benign neoplasms
0.0425516	0.0162361	2.6208	0.00877235	0.509018	3419	287796	1.04347	M13_FLATFOOT	M13	Flat foot [pes planus] (acquired)
-0.0460309	0.0175806	-2.61827	0.00883759	0.485948	3009	345118	0.955012	C3_KIDNEY_NOTRENALPELVIS_EXALLC	C3	Malignant neoplasm of kidney, except renal pelvis
-0.0399313	0.0152712	-2.61481	0.00892784	0.488359	4147	345118	0.960855	C3_COLON_ADENO_EXALLC	C3	Colon adenocarcinoma
0.0786992	0.0301259	2.61235	0.0089923	0.523811	988	420190	1.08188	ST19_ICTRAUOTHUNS	ST19	Other and unspecified intracranial injuries
0.0191538	0.00733343	2.61184	0.00900556	0.504477	18693	431119	1.01934	H8_VERTIGO	H8	Disorders of vestibular function (Vertigo)
0.0438798	0.0168096	2.6104	0.00904351	0.513651	3226	343176	1.04486	CD2_BENIGN_STOMACH_EXALLC	CD2	Benign neoplasm: Stomach
0.0253649	0.00972269	2.60884	0.00908501	0.502408	11091	442642	1.02569	I9_CAVS_RHEU	I9	Calcific aortic valvular stenosis, including rheumatic fever
-0.0864513	0.0331747	-2.60594	0.0091623	0.463612	779	452954	0.91718	CD2_BENIGN_MELANOCYTIC_SCALPNECK	CD2	Melanocytic naevi of scalp and neck
0.0361456	0.0138777	2.60457	0.0091989	0.508232	5000	441041	1.03681	F5_EMOPER	F5	Emotionally unstable personality disorder
0.0204156	0.00784591	2.60206	0.00926647	0.502275	17421	287796	1.02063	M13_HALLUXVALGUS	M13	Hallux valgus (acquired)
0.0953946	0.0367198	2.5979	0.00937945	0.528872	620	385082	1.10009	K11_DISOESINOTH	K11	Disorders of oesophagus in diseases classified elsewhere
0.0200489	0.00772795	2.59434	0.00947736	0.505524	17302	436431	1.02025	Z21_PERSONS_W_POTEN_HEALTH_HAZARDS_RELATED_COMMUNICAB_DISEA	Z21	Persons with potential health hazards related to communicable diseases
0.0259534	0.0100189	2.59044	0.00958529	0.507722	9799	443934	1.02629	ST19_EFFEC_FOREI_BODY_ENTERING_NATURAL_ORIFI	ST19	Effects of foreign body entering through natural orifice
0.0173839	0.00671285	2.58964	0.0096075	0.503864	22614	431119	1.01754	H8_INNER	H8	Diseases of inner ear
0.039155	0.0151202	2.58959	0.00960901	0.510977	4081	360393	1.03993	K11_OTHINT	K11	Other diseases of intestine
0.0476582	0.0184206	2.58722	0.00967536	0.509788	2730	394476	1.04881	L12_DERM_NUMMULAR	L12	Nummular dermatitis
0.108137	0.041816	2.58603	0.00970897	0.532722	450	423041	1.1142	L12_LOCALSCLERODERMA	L12	Localized scleroderma [morphea]
0.0350829	0.013578	2.5838	0.00977186	0.508553	5097	401125	1.03571	ST19_INJURY_MUSCLE_TENDON_WRIST_HAND_LEVEL	ST19	Injury of muscle and tendon at wrist and hand level
0.0280441	0.0108541	2.58374	0.00977357	0.505776	8298	439644	1.02844	FE	G6	Focal epilepsy
0.0543232	0.0210325	2.58282	0.00979969	0.519107	2021	440335	1.05583	H8_EXT_INFNAS	H8	Other infective otitis externa
0.0521404	0.0202027	2.58087	0.0098552	0.515754	2167	437420	1.05352	L12_PSORI_NAS	L12	Other and unspecified psoriasis
0.0153361	0.00594945	2.57774	0.00994495	0.504362	31780	369157	1.01545	PULM_ANXIETY	ASTHMA	Anxiety (asthma-related co-morbidities)
0.0164857	0.00643119	2.5634	0.0103654	0.503318	24835	428898	1.01662	VWXY20_FALL_SAME_LEVEL_INVOLVI_ICE_SNOW	VWXY20	Fall on same level involving ice and snow
0.0350938	0.0137016	2.56129	0.0104283	0.509214	5141	448592	1.03572	J10_EXTERLUNG	J10	Lung diseases due to external agents
-0.0650137	0.0254247	-2.55711	0.0105545	0.476103	1354	345118	0.937055	C3_KIDNEY_CLEAR_CELL_CARCINOMA_EXALLC	C3	Clear cell adenocarcinoma of kidney
-0.026946	0.0105437	-2.55564	0.0105993	0.491381	8801	444932	0.973414	C3_COLORECTAL	C3	Colorectal cancer
0.0370161	0.0144844	2.55559	0.0106007	0.503221	5091	397865	1.03771	H8_HL_PRESBY	H8	Presbycusis
0.0319526	0.0125083	2.55452	0.0106335	0.504023	6935	342690	1.03247	I9_AVBLOCK	I9	AV-block
-0.06406	0.0250796	-2.55427	0.010641	0.476276	1400	452333	0.937949	C3_EYE_BRAIN_NEURO	C3	Malignant neoplasm of eye, brain and central nervous system
-0.0260403	0.0101963	-2.55391	0.0106521	0.494562	10532	175886	0.974296	O15_POSTPART_HEAMORRH_LB	O15	Postpartum hemorraghe, parous woman as controls
0.0387461	0.0151726	2.55368	0.010659	0.508144	4159	413784	1.03951	MACULA_NAS	H7	Degenerative macular diseases
0.0298927	0.0117129	2.55212	0.0107068	0.506861	7122	360393	1.03034	K11_OTHILEUS	K11	Other or unspecified ileus, impaction or obstruction
0.017897	0.00702084	2.54913	0.0107992	0.49813	25680	428053	1.01806	F5_ORGANIC	F5	Organic, including symptomatic, mental disorders
0.109202	0.0428519	2.54836	0.0108229	0.535558	434	451648	1.11539	OSTPOPATFRACTURE	RHEUMA	Drug-induced osteoporosis with pathological fracture
0.0832815	0.032683	2.54816	0.0108293	0.526781	811	452353	1.08685	ST19_POST_TRAU_WOUND_INFECTION_NOT_ELSEW_CLASSIFIED	ST19	Post-traumatic wound infection, not elsewhere classified
0.0184819	0.00725585	2.54718	0.0108599	0.505113	19327	426283	1.01865	R18_ABNORMAL_FINDI_DIAGNOST_IMAGI_LUNG	R18	Abnormal findings on diagnostic imaging of lung
0.0233148	0.0091607	2.54509	0.010925	0.506458	12093	441640	1.02359	Z21_PERSONS_W_POTEN_HEALTH_HAZARDS_RELATED_SOCIO_PSYCHOSO_CIRCUMSTANC	Z21	Persons with potential health hazards related to socioeconomic and psychosocial circumstances
0.0375869	0.0147711	2.54463	0.0109393	0.509358	4222	397583	1.0383	K11_CHRONPANC	K11	Chronic pancreatitis
0.0489146	0.0193289	2.53065	0.0113851	0.513617	2441	287796	1.05013	M13_PYOGARTH	M13	Pyogenic arthritis
0.0584265	0.0230948	2.52986	0.0114108	0.517562	1605	452128	1.06017	C3_MENINGIOMA	C3	Brain meningioma
-0.0337406	0.0133622	-2.52509	0.011567	0.490845	5312	341944	0.966822	CD2_BENIGN_SKIN_EYELID_EXALLC	CD2	Benign neoplasm: Skin of eyelid, including canthus
0.0386844	0.015329	2.52361	0.0116158	0.507543	3990	384681	1.03944	DPP4INH	RX	Dipeptidyl peptidase 4 (DPP-4) inhibitors
0.0510094	0.0202167	2.52313	0.0116315	0.515248	2166	420369	1.05233	G6_NEUROOTH	G6	Other disorders of nervous system
0.0245477	0.00974976	2.51777	0.01181	0.502118	11027	442686	1.02485	I9_CAVS_DX	I9	Calcific aortic valvular stenosis, diagnosis (helper)
0.0245477	0.00974976	2.51777	0.01181	0.502118	11027	442686	1.02485	I9_CAVS_OPERATIONS2	I9	Operations 2 for CAVS
-0.0707617	0.0281493	-2.5138	0.0119438	0.473687	1067	344532	0.931684	CD2_BENIGN_THYROID_EXALLC	CD2	Benign neoplasm of thyroid gland
0.0285007	0.0113535	2.51029	0.0120631	0.505288	7555	439640	1.02891	FE_STRICT	G6	Focal epilepsy, strict definition
0.0158878	0.00633957	2.50613	0.0122061	0.502654	26149	427584	1.01601	AUD_SWEDISH	ALCO	Alcohol use disorder, Swedish definition
0.0331164	0.0132193	2.50515	0.0122399	0.510164	5331	394476	1.03367	L12_ALLERGICCONTACT	L12	Allergic contact dermatitis
0.0695428	0.0279752	2.48587	0.0129234	0.519255	1068	395832	1.07202	G6_MERALGIA	G6	Meralgia paraesthetica
0.0440849	0.0177527	2.48328	0.013018	0.509549	2808	432686	1.04507	L12_ROSACEANAS	L12	Other and unspecified rosacea
0.184119	0.0741608	2.4827	0.0130392	0.565496	134	410029	1.20216	STILL_ADULT	ILD	Adult-onset Still disease
0.0213808	0.00861908	2.48064	0.0131146	0.505583	13555	329493	1.02161	RX_OXYCODONE	RX	Oxycodone
0.162648	0.0656564	2.47726	0.0132396	0.550616	185	450562	1.17662	AB1_STREPTSTAPHYCOCC_INOTHER	AB1	Streptococcus and staphylococcus as the cause of diseases classified to other chapters
0.0141296	0.0057054	2.47653	0.0132668	0.504486	31954	421779	1.01423	K11_APPENDECTOMY	K11	Appendectomy
0.155963	0.0630068	2.47534	0.013311	0.556741	193	439424	1.16878	M13_HTROMBMICROANG	M13	Thrombotic microangiopathy
0.0221018	0.00893687	2.4731	0.0133947	0.504285	12933	329610	1.02235	KRA_PSY_ANYMENTAL_SUICID_PREG_NERV_EXMORE	KRA_PSY	Any mental disorder, or suicide (or attempt), or psychic disorders complicating pregnancy, partum or puerperium or nerve system disorders
0.0648529	0.0263018	2.46572	0.0136739	0.519238	1264	449536	1.067	ST19_TOXIC_EFFECT_CONTACT_W_VENOMO_ANIMALS	ST19	Toxic effect of contact with venomous animals
-0.0666062	0.0270538	-2.46199	0.0138168	0.47629	1155	435872	0.935564	AB1_RUBELLA	AB1	Rubella [German measles]
0.0817933	0.0332482	2.46008	0.0138905	0.530866	784	420112	1.08523	ST19_CONTU_TOES_WO_DAMAGE_NAIL	ST19	Contusion of toe(s) without damage to nail
0.0444567	0.0181078	2.45512	0.0140838	0.511558	2754	384093	1.04546	E4_MINERAL_MET	E4	Disorders of mineral metabolism
0.130348	0.0531751	2.4513	0.0142342	0.534826	284	452718	1.13922	D3_ACQHAEMOLYTICANAEMIANAS	D3	Other and unspecified acquired haemolytic anaemias
0.075493	0.0308057	2.45062	0.0142611	0.523114	915	450402	1.07842	ENCEPHALITIS	NEURO	Encephalitis
0.0252998	0.010334	2.44821	0.0143569	0.504909	8926	397865	1.02562	H8_TINNITUS	H8	Tinnitus
-0.0310334	0.0126878	-2.44592	0.0144485	0.489647	6089	447644	0.969443	RX_D07AA	RX	D07AA Corticosteroids, weak (group I)
0.0238228	0.00974269	2.44519	0.0144774	0.501884	11047	442686	1.02411	I9_CAVS	I9	Calcific aortic valvular stenosis
0.0238228	0.00974269	2.44519	0.0144774	0.501884	11047	442686	1.02411	I9_CAVS_OPERATED	I9	Calcific aortic valvular stenosis, operated
-0.0287187	0.0117634	-2.44135	0.0146324	0.492027	7096	119468	0.97169	N14_ENDOMETRIOSIS_OVARY	N14	Endometriosis of ovary
0.024279	0.00995919	2.43785	0.0147748	0.507126	9969	385381	1.02458	ST19_SUPERF_INJURY_LOWER_LEG	ST19	Superficial injury of lower leg
0.0501975	0.0205925	2.43766	0.0147826	0.512862	2203	106310	1.05148	IBD_VIRAL_HEPATITIS	AB1	Viral hepatitis, IBD co-morbidity
0.120734	0.0495588	2.43617	0.0148435	0.535489	322	438277	1.12832	K11_IBD_STRICT_PSC	GASTRO	IBD (strict) with PSC
0.195328	0.0802629	2.43361	0.0149492	0.56593	116	446531	1.21571	D3_OTHPRIMTHROMBOCYTOPENIA	D3	Other primary thrombocytopenia
0.0412736	0.0169939	2.42874	0.0151516	0.510116	3150	429396	1.04214	H7_CORNEALOTH	H7	Other disorders of cornea
0.116942	0.0481624	2.42808	0.0151789	0.538559	359	432955	1.12405	H7_STRABNAS	H7	Other specified and unspecified strabismus
0.117574	0.048446	2.4269	0.0152284	0.541848	338	384436	1.12476	Z21_PERSONAL_HISTORY_ALLERGY_DRUGS_MEDICAM_BIOLO_SUBST	Z21	Personal history of allergy to drugs, medicaments and biological substances
0.0415373	0.0171175	2.4266	0.0152411	0.508508	3318	384093	1.04241	E4_VOLUME	E4	Volume depletion
0.0351213	0.0145192	2.41897	0.0155647	0.511356	5135	448598	1.03575	K11_PULPITIS_3_ONLYAVO	K11	Dental pulpitis 3, only avohilmo
0.0758305	0.0313529	2.41861	0.0155798	0.515564	913	450259	1.07878	AMPUTATION_THIGH	DIAB	Amputation of thigh
0.0225934	0.00934553	2.41756	0.0156248	0.507519	11286	442447	1.02285	ST19_OTHER_UNSPE_EFFEC_EXTER_CAUSES	ST19	Other and unspecified effects of external causes
0.0428595	0.0177447	2.41535	0.0157201	0.507848	2804	385630	1.04379	E4_GOITRENAS	E4	Other and/or unspecified nontoxic goitre
0.0840463	0.0348088	2.41451	0.0157562	0.527283	712	413784	1.08768	H7_RETINAHAEMORR	H7	Retinal haemorrhage
0.0299158	0.0124109	2.41045	0.0159329	0.51162	6384	226439	1.03037	N14_VAGINITIS	N14	Vaginitis/vulvovaginitis/vulvitis/abscess of vulva
0.0330788	0.0137302	2.4092	0.0159874	0.508394	4848	326530	1.03363	M13_TROCHANTERICBURSITIS	M13	Trochanteric bursitis
0.0492039	0.020432	2.40818	0.0160325	0.515218	2174	437371	1.05043	VIRALPNEUMONAS	ASTHMA	Viral pneumonia (unknown virus, not influenza)
0.0963485	0.0400242	2.40726	0.0160728	0.526327	545	440202	1.10114	F5_PHYSBEHOTH	F5	Unspecified behavioural syndromes associated with physiological disturbances and physical factors +Physiological and behavioural factors associated with disorders of diseases classified elsewhere
0.0127001	0.00528118	2.40478	0.0161821	0.500607	42736	397865	1.01278	H8_CONSENHEARINGLOSS	H8	Conductive and sensorineural hearing loss
0.0140705	0.00585513	2.40311	0.0162562	0.504647	33851	354844	1.01417	Z21_CONTRACEPTIVE_MANAG	Z21	Contraceptive management
0.0432543	0.0180026	2.40268	0.0162755	0.51198	2870	432955	1.0442	H7_HETEROPHORIA	H7	Heterophoria
0.0365123	0.0152081	2.40085	0.0163569	0.512257	3982	449751	1.03719	VWXY20_BITTEN_STRUCK_OTHER_MAMMALS	VWXY20	Bitten or struck by other mammals
0.0483846	0.0201542	2.40072	0.0163626	0.509376	2280	314967	1.04957	R18_OTHER_SYMPTOMS_SIGNS_INVOLVI_CIRCULATO_RESPI_SYSTEMS	R18	Other symptoms and signs involving the circulatory and respiratory systems
-0.104495	0.0435832	-2.39759	0.0165035	0.458125	424	446531	0.90078	D3_VONVILLEBRAND	D3	Von Willebrand disease
-0.0926758	0.0386706	-2.39654	0.0165506	0.47437	602	345003	0.911489	CD2_INSITU_SKIN_SCALPNECK_EXALLC	CD2	Carcinoma in situ of skin of scalp and neck
0.0230367	0.00961369	2.39624	0.0165644	0.505672	10251	326530	1.0233	M13_IMPINGEMENT	M13	Impingement syndrome of shoulder
0.0164838	0.00688209	2.39517	0.0166128	0.501957	22659	384681	1.01662	GLP1ANA	RX	Glucagon-like peptide-1 (GLP-1) analogues
0.0712348	0.0298156	2.38918	0.0168862	0.521615	1005	345118	1.07383	C3_LIVER_INTRAHEPATIC_BILE_DUCTS_EXALLC	C3	Malignant neoplasm of liver and intrahepatic bile ducts
0.0641566	0.0268564	2.38888	0.0169	0.521788	1172	287796	1.06626	M13_TOEDEFORMOTH	M13	Other deformities of toe(s)
0.0561496	0.0235357	2.38572	0.0170455	0.511191	1659	288472	1.05776	K11_GINGIVA	K11	Other disorders of gingiva or/and edentulous alveolar ridge
0.0210364	0.00883143	2.382	0.017219	0.510117	14127	217833	1.02126	Z21_SPECIAL_SCREEN_EXAM_INFECTIOUS_PARASITIC_DISEA	Z21	Special screening examination for infectious and parasitic diseases
0.0362516	0.0152271	2.38073	0.0172783	0.509987	4070	413113	1.03692	ST19_SUPERF_INJURY_SHOUL_UPPER_ARM	ST19	Superficial injury of shoulder and upper arm
0.056354	0.0236742	2.3804	0.017294	0.516669	1553	287796	1.05797	M13_MONOARTHRITIS	M13	Monoarthritis, not elsewhere classified
0.0405653	0.0170462	2.37973	0.0173253	0.502466	3499	378019	1.0414	I9_POSTAMI	I9	Status post-ami
0.0894364	0.0376237	2.37713	0.0174479	0.529481	599	241998	1.09356	E4_OVARFAIL	E4	Primary ovarian failure
0.16308	0.068866	2.36807	0.017881	0.561454	152	425881	1.17713	E4_LOCALADIP	E4	Localized adiposity
0.0931413	0.0393454	2.36727	0.0179197	0.524898	546	448722	1.09762	VWXY20_ASSAU_SHARP_OBJECT	VWXY20	Assault by sharp object
0.0204702	0.00864808	2.36702	0.0179317	0.50496	12979	440754	1.02068	R18_SYMPTOMS_SIGNS_INVOLVI_SPEECH_VOICE	R18	Symptoms and signs involving speech and voice
0.229046	0.0968827	2.36416	0.0180709	0.599551	74	287796	1.2574	M13_INTERHYDRARTHR	M13	Intermittent hydrarthrosis
0.123561	0.0522769	2.36358	0.0180991	0.534819	297	453436	1.13152	VWXY20_UNSPE_THREAT_BREAT	VWXY20	Unspecified threat to breathing
0.013969	0.00591549	2.36143	0.0182047	0.50423	31780	403817	1.01407	F5_ALLANXIOUS	F5	All anxiety disorders
0.0345928	0.0146799	2.35648	0.0184491	0.510003	4576	441640	1.0352	Z21_OTHER_PROBL_RELATED_PRIMARY_SUPPORT_GROUP_INCLU_FAMILY_CIRCUMSTANC	Z21	Other problems related to primary support group, including family circumstances
0.0485396	0.0206148	2.35459	0.0185429	0.504125	2700	199505	1.04974	AD_AM_EXMORE	NEURO	Alzheimer‚Äôs disease (Atypical or mixed)
0.0720451	0.0305987	2.35452	0.0185467	0.514584	971	441640	1.0747	Z21_PROBL_RELATED_SOCIAL_ENVIRONMENT	Z21	Problems related to social environment
0.0217171	0.00922989	2.35291	0.0186273	0.507422	11718	242900	1.02195	N14_FEMALE_GENITAL_DYSPLASIA_ALL	N14	All dysplastic lesions of the cervix uteri, vagina or vulva
0.0136541	0.00581117	2.34964	0.0187916	0.505019	35097	418636	1.01375	J10_TONSILLECTOMY	J10	Tonsillectomy and adenotomy
0.064315	0.0273751	2.3494	0.0188039	0.515528	1217	316345	1.06643	I9_HYPTENSRD	I9	Hypertensive Renal Disease
0.0408506	0.0174133	2.34594	0.0189789	0.513783	3029	422407	1.0417	H8_EUSTSALP	H8	Eustachian salpingitis and obstruction
0.0131675	0.00561865	2.34354	0.0191019	0.50327	38157	209208	1.01325	K11_PARODON_OPER_DENTAL_OPER	K11	Parodontitis or/and operation codes
0.0389638	0.0166399	2.3416	0.0192015	0.514456	3166	326530	1.03973	M13_FIBROMYALGIA	M13	Fibromyalgia
0.118571	0.0507409	2.33679	0.0194501	0.531721	402	453331	1.12589	P16_FET_NEWB_MATERN_FACTO_COMPLICATIO_PREGNAC_LABOUR_DELIV	P16	Fetus and newborn affected by maternal factors and by complications of pregnancy, labour and delivery
0.0462902	0.0198323	2.33408	0.0195916	0.511346	2354	451379	1.04738	K11_MN_RETRGN	K11	Mandibular retrognathia
0.0461012	0.019812	2.32694	0.0199686	0.511756	2403	451330	1.04718	VWXY20_ACCIDENTAL_POISO_EXPOS_OTHER_UNSPE_DRUGS_MEDICAM_BIOLO_SUBST	VWXY20	Accidental poisoning by and exposure to other and unspecified drugs, medicaments and biological substances
0.0665193	0.0286407	2.32255	0.0202034	0.518859	1055	449432	1.06878	N14_DISIMPAIRRENTUB	N14	Disorders resulting from impaired renal tubular function
0.0695836	0.0299832	2.32075	0.0203003	0.521276	953	446523	1.07206	D3_IMMUNEMECHANISMOTHER	D3	Other disorders involving the immune mechanism, not elsewhere classified
0.0421782	0.0181808	2.31993	0.0203449	0.508735	2827	449570	1.04308	G6_MYOPOTHUNS	G6	Other and unspecified myopathies
-0.0210771	0.00908536	-2.31989	0.0203467	0.492907	11784	441949	0.979144	CD2_BENIGN_MELANOCYTIC	CD2	Melanocytic naevi
0.0186344	0.00804577	2.31605	0.0205555	0.505299	15939	314967	1.01881	R18_ABNORMALITI_HEART_BEAT	R18	Abnormalities of heart beat
0.0126876	0.00548033	2.31512	0.0206065	0.500395	39620	397865	1.01277	H8_HL_SEN_NAS	H8	Sensorineural hearing loss
0.016005	0.00691877	2.31328	0.0207075	0.504445	21579	427652	1.01613	R18_ABNORMAL_FINDI_SECRE_SMEARS_CERVIX_UTERI_VAGINA_VULVA	R18	Abnormal findings in secretions and smears from cervix uteri vagina vulva
-0.0464965	0.0201241	-2.31049	0.0208609	0.488226	2315	343877	0.954568	CD2_INSITU_SKIN_EXALLC	CD2	Carcinoma in situ of skin
0.24016	0.104081	2.30743	0.0210309	0.582016	63	445700	1.27145	M13_RELAPSPOLYCHONDR	M13	Relapsing polychondritis
0.141239	0.0612269	2.30682	0.0210648	0.551887	208	451899	1.1517	L12_PEMPHIGUS	L12	Pemphigus
0.0438112	0.0189972	2.3062	0.0210996	0.511357	2568	406534	1.04479	N14_TUBULOINTNEPHRNAS	N14	Tubulo-interstitial nephritis, not specified as acute or chronic
0.103146	0.0447504	2.30492	0.0211709	0.527432	437	141300	1.10865	N14_INFLAMALEGEN	N14	Inflammatory disorders of male genital organs, not elsewhere classified
0.0677525	0.0294137	2.30343	0.0212545	0.52059	979	395832	1.0701	G6_MONONPOTHUS	G6	Other and unspecified mononeuropathies of upper limb
-0.0224591	0.00975809	-2.30158	0.0213586	0.495297	10532	244086	0.977791	O15_POSTPART_HEAMORRH_ALLW	O15	Postpartum hemorraghe, all woman as controls
0.0715419	0.0310933	2.30087	0.0213988	0.520965	883	446523	1.07416	D3_IMMUNEMECHANISMNAS	D3	Other and unspecified disorders involving the immune mechanism, not elsewhere classified
0.0727091	0.0316084	2.30031	0.0214308	0.522025	887	345118	1.07542	C3_LIVER_INTRAHEPATIC3_BILE_DUCTS_EXALLC	C3	Malignant neoplasm of liver and intrahepatic bile ducts
-0.0424462	0.0184621	-2.2991	0.0214993	0.481579	2945	439144	0.958442	F5_SCHIZOAFF	F5	Schizoaffective disorder
0.0246469	0.0107282	2.29741	0.0215955	0.506922	8243	445490	1.02495	D3_BLOODOTHER	D3	Other diseases of blood and blood-forming organs
0.0392383	0.0170819	2.29706	0.0216151	0.508848	3171	368973	1.04002	N14_NEUROMUSCDYSBLADD	N14	Neuromuscular dysfunction of bladder
0.0718132	0.0312673	2.29675	0.0216331	0.500351	863	326530	1.07445	M13_SHORTACHILLES	M13	Short Achilles tendon (acquired)
0.169357	0.0737542	2.29624	0.0216623	0.542293	177	453368	1.18454	P16_BACTERIAL_SEPSIS_NEWBO	P16	Bacterial sepsis of newborn
-0.0162081	0.00706143	-2.2953	0.0217158	0.495708	21033	233585	0.983923	N14_BREAST	N14	Disorders of breast
0.0209023	0.00913895	2.28716	0.0221864	0.504522	11778	441955	1.02112	K11_STRICTURE	K11	Intestinal stricture
0.0538346	0.0235582	2.28517	0.0223026	0.517503	1569	446531	1.05531	D3_COAGDEFNAS	D3	Other and unspecified coagulation defects
0.0117143	0.00513569	2.28095	0.0225514	0.501003	43764	409969	1.01178	BLEEDING	MISC	Bleeding
-0.0387781	0.0170294	-2.27712	0.0227789	0.490076	3213	345118	0.961964	C3_RECTUM_EXALLC	C3	Malignant neoplasm of rectum
0.114648	0.0503957	2.27496	0.0229083	0.542724	322	453411	1.12148	VWXY20_CONTACT_W_VENOMO_SNAKES_LIZAR	VWXY20	Contact with venomous snakes and lizards
0.0919767	0.040514	2.27024	0.0231928	0.531704	493	326530	1.09634	M13_BURSCYSTOTH	M13	Other bursal cyst
0.174231	0.0769136	2.26528	0.0234956	0.569177	133	453171	1.19033	AB1_ENTEROBIASIS	AB1	Enterobiasis
0.0669308	0.0295558	2.26456	0.0235397	0.520098	972	452761	1.06922	OPER_SGB	DENTAL	Filling of root of tooth
0.252872	0.111822	2.26138	0.0237358	0.585889	55	438277	1.28772	K11_CD_STRICT_PSC	GASTRO	Crohn's disease (strict) with PSC
0.13177	0.0584105	2.25594	0.0240744	0.53986	227	453506	1.14085	ACUTE_DRUGADVERS_INTERSTITIAL_LUNG_DISORD	J10	Acute drug-induced interstitial lung disorder
0.105031	0.0465763	2.25502	0.0241319	0.539503	375	119468	1.11074	N14_PREMENSTSYNDROM	N14	Premenstrual syndrome
-0.09061	0.0401861	-2.25476	0.0241483	0.464492	508	345118	0.913374	C3_GBM_ASTROCYTOMA_EXALLC	C3	Brain glioblastoma and astrocytoma
0.163085	0.0723433	2.25432	0.0241762	0.553479	147	446826	1.17714	I9_CARDMYOALC	I9	Alcoholic cardiomyopathy
0.0219031	0.00973867	2.24909	0.0245068	0.507569	10842	119468	1.02214	N14_DYSPLACERVUT	N14	Dysplasia of cervi uteri
0.0633284	0.0282485	2.24183	0.0249725	0.511429	1094	394476	1.06538	L12_LICHENSIMPLEX	L12	Lichen simplex chronicus
0.0713429	0.0318365	2.24092	0.0250315	0.522082	853	450820	1.07395	G6_ENCEPHOTH	G6	Other encephalitis
0.078066	0.0348681	2.23889	0.025163	0.523412	707	435305	1.08119	D3_ANAEMIAINCHRONICDISEASE	D3	Anaemia in chronic diseases classified elsewhere
0.0594375	0.0265632	2.23759	0.0252477	0.51518	1337	451313	1.06124	K11_HYPO_ONLY	K11	Tooth agenesis EXCLUDE clefts and syndromes
0.161637	0.072301	2.23561	0.0253774	0.553478	147	453586	1.17543	CARMYOPATHALCO	ALCO	Alcoholic cardiomyopathy
0.0408994	0.0183108	2.23362	0.025508	0.50953	2745	450988	1.04175	AB1_OTHER_INFECTIONS	AB1	Other infectious diseases
0.216803	0.0972706	2.22887	0.0258229	0.583564	73	432686	1.2421	L12_HAIRLOSS_SCARNAS	L12	Other and unspecified cicatricial alopecia
0.0926281	0.0415707	2.22821	0.0258667	0.531387	462	326530	1.09705	M13_CHRONSYNOVITISHANDWRIST	M13	Chronic crepitant synovitis/bursitis of hand and wrist/periarthritis of wrist
0.180002	0.080885	2.2254	0.0260543	0.573034	110	446523	1.19722	D3_HEREDHYPOGAMMA	D3	Hereditary hypogammaglobulinemia
0.030397	0.0136661	2.22427	0.0261303	0.508215	4964	326530	1.03086	M13_BURSOPATHY	M13	Other bursopathies
0.0317986	0.014297	2.22415	0.0261386	0.503413	4692	448583	1.03231	PDSTRICT	NEURO	Parkinson's disease, strict definition
0.204534	0.0920062	2.22305	0.0262125	0.571164	87	384093	1.22695	E4_FLUIDOVER	E4	Fluid overload
0.0169441	0.00762744	2.22147	0.0263194	0.497578	22462	431271	1.01709	F5_DEMENTIA_INCLAVO	F5	Dementia, including avohilmo
0.0676266	0.0304432	2.22141	0.0263235	0.522064	930	448517	1.06997	ST19_BURNS_CORROSIO_CONFIN_EYE_INTERNAL_ORGANS	ST19	Burns and corrosions confined to eye and internal organs
0.058887	0.0265338	2.21932	0.0264652	0.519769	1179	322314	1.06066	M13_GLUTEALTEND	M13	Gluteal tendinitis
0.0263838	0.0118953	2.21801	0.0265541	0.506334	6831	446902	1.02673	VWXY20_INTENTI_SELF_P_EXPOS_OTHER_UNSPE_CHEMIC_NOXIO_SUBST	VWXY20	Intentional self-poisoning by and exposure to other and unspecified chemicals and noxious substances
0.0246367	0.0111079	2.21794	0.0265586	0.498941	11755	199505	1.02494	G6_ALZHEIMER_EXMORE	G6	Alzheimer disease
-0.0407708	0.0183892	-2.2171	0.0266164	0.488449	2651	251967	0.960049	CD2_INSITU_BREAST_INTRADUCTAL	CD2	Carcinoma in situ of breast, intraductal
0.0122225	0.00552579	2.21191	0.026973	0.503732	38322	216296	1.0123	E4_PCOS_CONCORTIUM	E4	Polycystic ovarian syndrome, consortium definition
0.0221718	0.0100252	2.21161	0.0269937	0.505547	9695	326530	1.02242	M13_FIBROBLASTIC	M13	Fibroblastic disorders
0.0667296	0.0301851	2.21068	0.0270579	0.523212	998	432149	1.06901	H7_MODVISIMPBINOC	H7	Moderate visual impairment, binocular
0.0454933	0.0205812	2.21043	0.0270751	0.510724	2091	451642	1.04654	OPER_ARTIF_JOINT_REOP	M13	Artificial joint re-operation
0.0382251	0.017303	2.20916	0.0271637	0.507105	3163	393854	1.03897	ASTHMA_NONALLERG	ASTHMA	Non-allergic asthma
0.0132823	0.00601343	2.20877	0.0271903	0.501944	29456	424277	1.01337	ALCOHOL_RELATED	ALCO	Alcohol related diseases and deaths, all endpoints
-0.061242	0.0277429	-2.20748	0.0272805	0.482484	1139	344795	0.940596	CD2_INSITU_MELANOMA_EXALLC	CD2	Melanoma in situ
0.0120955	0.0054822	2.20633	0.0273611	0.505345	37586	416147	1.01217	K11_CARIES_2	K11	Dental caries 2
0.0154139	0.00700048	2.20184	0.0276766	0.503665	21244	432489	1.01553	VWXY20_UNSPE_FALL	VWXY20	Unspecified fall
-0.132873	0.0605373	-2.19489	0.0281712	0.447363	211	434894	0.875576	E4_ACROMEG	E4	Acromegaly and pituitary gigantism
0.0205232	0.00935492	2.19384	0.0282468	0.503869	10867	442866	1.02074	M13_EARLY_LUMBAR_PROLAPSE	M13	Early lumbar disc prolapse, operated
0.151144	0.068895	2.19384	0.0282472	0.550628	160	439424	1.16316	M13_HYPERANG	M13	Hypersensitivity angiitis
0.0695113	0.0317045	2.19248	0.0283451	0.512987	930	412105	1.07198	I9_PROGVASC	I9	Progressive vascular leukoencephalopathy
0.0436715	0.0199249	2.1918	0.0283938	0.512282	2432	288472	1.04464	K11_DEPOSITS	K11	Deposits [accretions] on teeth
0.0229075	0.0104577	2.1905	0.0284877	0.504716	9012	432955	1.02317	H7_STRABOTH	H7	Other strabismus
0.178589	0.0815687	2.18943	0.0285658	0.561468	111	446523	1.19553	D3_IMMUDEFNAS	D3	Other or unspecified immunodeficiency
0.0725923	0.0331704	2.18847	0.0286355	0.524185	766	440367	1.07529	AB1_SYPHILIS	AB1	Syphilis
0.0769552	0.0352441	2.18349	0.0289997	0.527017	665	326530	1.07999	M13_SYNOTENDINOTH	M13	Disorders of synovium and tendon in diseases classified elsewhere
-0.061286	0.0281001	-2.18099	0.0291843	0.475934	1067	452666	0.940554	CD2_BENIGN_THYROID	CD2	Benign neoplasm of thyroid gland
0.0325932	0.0149515	2.17993	0.029263	0.505154	4195	394476	1.03313	L12_INFECT_DERM	L12	Infective dermatitis
0.118782	0.0545213	2.17864	0.0293587	0.541009	271	384093	1.12612	E4_FLUIDELECTRONAS	E4	Other disorders of electrolyte and fluid balance, not elsewhere classified
0.023176	0.0106471	2.17676	0.0294988	0.506934	8784	444949	1.02345	VWXY20_OTHER_FALL_ONE_LEVEL	VWXY20	Other fall from one level to another
0.0392928	0.0180515	2.17671	0.0295023	0.507501	3296	51410	1.04008	DM2_NEPHROPATHY	E4	Type 2 diabetes with nephropathy
0.0543393	0.0249897	2.17446	0.0296703	0.520904	1442	420112	1.05584	ST19_OTHER_UNSPE_INJURI_ANKLE_FOOT	ST19	Other and unspecified injuries of ankle and foot
0.0375606	0.0172922	2.17212	0.029847	0.509206	3043	450690	1.03827	CD2_BENIGN_LIPO_NOS	CD2	Benign lipomatous neoplasm of other sites/unspecified
-0.0345416	0.0159112	-2.17089	0.0299393	0.491001	3745	119468	0.966048	N14_ENDOMETRIOSIS_NOS	N14	Unspecified/other endometriosis
0.0528277	0.0243875	2.16618	0.0302972	0.51295	1484	450857	1.05425	R18_CRAMP_SPASM	R18	Cramp and spasm
0.0589307	0.0272051	2.16616	0.0302989	0.520965	1172	452561	1.0607	VWXY20_ACCIDENTAL_POISO_EXPOS_OTHER_UNSPE_CHEMIC_NOXIO_SUBST	VWXY20	Accidental poisoning by and exposure to other and unspecified chemicals and noxious substances
0.0391005	0.0180536	2.1658	0.0303263	0.514041	2747	449462	1.03987	SMOKING_DEPEND	ASTHMA	Smoking dependency
0.0295256	0.0136335	2.16567	0.0303368	0.508081	5025	448708	1.02997	H7_EYEOTH	H7	Other disorders of eye and adnexa
-0.116245	0.0536957	-2.16489	0.0303958	0.457325	278	345118	0.890257	CD2_IMMUNOPROLIFERATIVE_EXALLC	CD2	Malignant immunoproliferative diseases
0.0420741	0.019437	2.16464	0.0304154	0.511015	2364	312465	1.04297	R18_ASCITES	R18	Ascites
0.179784	0.0831174	2.16302	0.0305399	0.565273	104	453629	1.19696	VAGINAL_LICHEN_PLANUS	K11	Vaginal lichen planus
0.0557622	0.0258075	2.1607	0.0307186	0.513804	1289	426022	1.05735	E4_OBESITYXTRMALV	E4	Extreme obesity with alveolar hypoventilation
0.110048	0.0509346	2.16058	0.0307279	0.533662	298	326530	1.11633	M13_CALCTENDINITIS	M13	Calcific tendinitis
0.0651498	0.0301885	2.1581	0.0309202	0.524679	927	413784	1.06732	H7_CHORIORETINFLAM	H7	Chorioretinal inflammation
0.0155306	0.00719649	2.15808	0.0309217	0.505251	19693	307932	1.01565	O15_POSTPART_DEPR	O15	Postpartum depression
0.0202989	0.00940991	2.15718	0.0309916	0.505038	11781	200533	1.02051	O15_MATERN_CARE_PELVIC_ABNORM	O15	Maternal care for known or suspected abnormality of pelvic organs
0.0446211	0.0206853	2.15714	0.030995	0.511709	2032	429396	1.04563	H7_SCLERITISEPISCLERITIS	H7	Scleritis and episcleritis
0.207254	0.0961175	2.15625	0.031064	0.569981	77	446523	1.23029	D3_CVID_BCELL	D3	Common variable immunodeficiency with predominant abnormalities of B-cell numbers and function
0.233588	0.108492	2.15304	0.0313158	0.581122	60	412885	1.26312	H7_LACRINAS	H7	Other and unspecified disorders of lacrimal system
0.0610066	0.0283903	2.14885	0.0316459	0.517514	1054	426587	1.06291	SCND_OTH_COXARTHROSIS	RHEUMA	Other secondary coxarthrosis
0.0361448	0.0168322	2.14736	0.0317644	0.51005	450329	3404	1.03681	ANY_HILMO	SHARED	Any event in hilmo or specialist outpatient
0.0679996	0.0316807	2.1464	0.0318408	0.516186	848	438369	1.07036	L12_OTHACUSKINSUNNAS	L12	Other and unspecified acute skin changes due to ultraviolet radiation
0.0387778	0.018071	2.14586	0.0318843	0.513965	2747	445828	1.03954	F5_TOBAC	F5	Mental and behavioural disorders due to tobacco
0.0196357	0.00915398	2.14505	0.0319489	0.504576	11458	442275	1.01983	CD2_BENIGN_LIPOMATOUS	CD2	Benign lipomatous neoplasm
0.0328743	0.0153396	2.1431	0.0321049	0.506964	3996	433110	1.03342	COPD_INSUFFICIENCY	COPD	COPD-related respiratory insufficiency
-0.0210707	0.00984046	-2.14123	0.0322552	0.495412	10532	194563	0.97915	O15_POSTPART_HEAMORRH	O15	Postpartum haemorrhage
0.039762	0.0185916	2.13871	0.032459	0.511673	2592	451141	1.04056	VWXY20_UNINT_CUT_PUNCTU_PERFORATION_HAEMORRHAGE_SURGI_MEDICAL_CARE	VWXY20	Unintentional cut, puncture, perforation or haemorrhage during surgical and medical care
-0.0206154	0.00964504	-2.13741	0.032565	0.489901	10878	434925	0.979596	R18_ABNORMAL_SERUM_ENZYME_LEVELS	R18	Abnormal serum enzyme levels
0.0118816	0.00556037	2.13683	0.0326121	0.505298	36324	417409	1.01195	K11_CARIES_2_OPER	K11	Dental caries 2 and operation codes
-0.023307	0.0109075	-2.1368	0.0326147	0.495222	8469	201226	0.976963	C3_BREAST_ERNEG_EXALLC	C3	Malignant neoplasm of breast, HER-negative
0.0473097	0.0221505	2.13583	0.0326934	0.51537	1909	241998	1.04845	E4_PCOS	E4	Polycystic ovarian syndrome
-0.0327112	0.0153351	-2.13309	0.0329172	0.490794	3932	449801	0.967818	C3_MELANOMA_SKIN	C3	Malignant melanoma of skin
0.131171	0.0615212	2.13213	0.0329965	0.531874	205	429396	1.14016	H7_CORNEALOEDEMA	H7	Other corneal oedema
0.0110197	0.00517124	2.13096	0.0330928	0.502365	40620	413113	1.01108	ST19_INJURI_SHOUL_UPPER_ARM	ST19	Injuries to the shoulder and upper arm
0.0745174	0.0349796	2.13031	0.0331458	0.518559	707	451634	1.07736	ST19_BURN_CORROSION_HEAD_NECK	ST19	Burn and corrosion of head and neck
-0.027457	0.0128925	-2.12968	0.0331981	0.49067	6251	141300	0.972917	N14_HYDROCELE	N14	Hydrocele
0.0184099	0.00864902	2.12855	0.0332915	0.50609	13362	440371	1.01858	U22_CODES_SPECIAL_PURPO	U22	Codes for special purposes
0.0625648	0.0293969	2.12828	0.0333138	0.517049	991	440335	1.06456	H8_EXTDISINOTH	H8	Disorder of external ear, unspecified
0.0287141	0.0135246	2.12309	0.0337462	0.505389	5237	397583	1.02913	K11_CHOLECYST	K11	Cholecystitis
0.0205625	0.00969102	2.12181	0.0338534	0.504875	10117	440754	1.02078	R18_VOICE_DISTU	R18	Voice disturbances
0.0183331	0.00865793	2.11749	0.0342182	0.506064	13333	440400	1.0185	U22_PROVI_ASSIG_NEW_DISEA_UNCER_ETIOL	U22	Provisional assignment of new diseases of uncertain etiology
0.0361262	0.0170643	2.11707	0.0342543	0.50915	3121	450612	1.03679	CD2_BENIGN_CAECUM	CD2	Benign neoplasm: Caecum
0.122148	0.0577349	2.11567	0.034373	0.543289	228	432686	1.12992	L12_HAIRLOSSSCAR	L12	Cicatricial alopecia [scarring hair loss]
0.034466	0.0163211	2.11175	0.034708	0.50629	3504	441041	1.03507	F5_OTHPER	F5	Other specified and unspecified personality disorders
-0.25457	0.120634	-2.11026	0.0348357	0.394872	55	450415	0.77525	H7_VISUALPATHNAS	H7	Disorder of visual pathways, unspecified
0.0293569	0.0139186	2.10918	0.0349287	0.506803	4832	413573	1.02979	H7_OTHERCONJ	H7	Other disorders of conjunctiva
0.0378075	0.0180121	2.09901	0.0358158	0.510595	2829	360393	1.03853	K11_ADHE	K11	Intestinal adhesions without obstruction
-0.0574767	0.0273834	-2.09896	0.0358203	0.480636	1196	345117	0.944144	C3_NONHODGKIN_EXALLC	C3	Non-Hodgkin lymphoma, all
0.0519535	0.0247667	2.09771	0.0359305	0.513206	1464	452269	1.05333	C3_BILIARY_GALLBLADDER	C3	Malignant neoplasm of intrahepatic ducts, biliary tract and gallbladder
0.141925	0.0677247	2.09561	0.0361167	0.554094	181	434894	1.15249	E4_ADREACT	E4	Other adrenocortical overactivity
0.0569841	0.0272048	2.09463	0.0362035	0.514811	1203	342690	1.05864	I9_PERICARD	I9	Pericarditis
0.109158	0.0521209	2.09432	0.0362316	0.53006	365	453368	1.11534	P16_INFECTIONS_SPECIFIC_PERINA_PERIOD	P16	Infections specific to the perinatal period
-0.0840373	0.0401552	-2.09281	0.0363658	0.466718	508	453225	0.919397	C3_GBM_ASTROCYTOMA	C3	Brain glioblastoma and astrocytoma
-0.0420425	0.020094	-2.09229	0.0364123	0.486343	2279	451454	0.958829	VWXY20_VEITS_PUUKK_TIKAR_TAI_MIEKK_LIITTYVA_TAPATURMA	VWXY20	Contact with other sharp object(s)
0.0549562	0.0262986	2.0897	0.0366449	0.512765	1253	395832	1.05649	G6_RADLES	G6	Lesion of radial nerve
0.15276	0.0731297	2.08889	0.0367172	0.541634	141	451214	1.16505	AB1_HEPATITIS_A	AB1	Acute hepatitis A
0.15276	0.0731297	2.08889	0.0367172	0.541634	141	451214	1.16505	HEPATITIS_A	AB1	Acute hepatitis A
0.0707808	0.0339181	2.08681	0.0369051	0.521462	726	453007	1.07335	N14_IGA_NEPHROPATHY	N14	IgA nephropathy (IgA glomerulonephritis)
0.108536	0.0520248	2.08623	0.036958	0.528284	300	442845	1.11464	GOUT_KIDNEY	RHEUMA	Gout due to impairment of renal function
0.0265673	0.0127426	2.08492	0.0370761	0.506	5705	194563	1.02692	O15_LABOUR_PELVIC_ABNORM	O15	Obstructed labour due to maternal pelvic abnormality
0.0406996	0.0195345	2.08347	0.0372083	0.511255	2416	447730	1.04154	INV_VENT	COPD	Invasive ventilation
0.0914666	0.0439432	2.08147	0.0373907	0.522702	437	453296	1.09578	VWXY20_MOTOR_NONMOTOR__ACCIDENT_TYPE_VEHIC_UNSPE2	VWXY20	Motor- or nonmotor-vehicle accident, type of vehicle unspecified
0.0437181	0.0210089	2.08093	0.0374401	0.514834	2035	287796	1.04469	M13_PATELLADISLOCATIO	M13	Recurrent dislocation of patella
0.101923	0.048988	2.08057	0.037473	0.537878	325	326530	1.1073	M13_PANNICULITISNAS	M13	Panniculitis, unspecified
0.0546326	0.0262667	2.07991	0.0375335	0.517535	1304	119468	1.05615	N14_OLIGOMEN	N14	Oligomenorrhoea
0.0463965	0.0223109	2.07955	0.037567	0.509566	1847	231952	1.04749	I9_MYOCARD	I9	Myocarditis
0.0620461	0.0298528	2.0784	0.0376724	0.519317	984	442447	1.06401	ST19_EFFEC_OTHER_EXTER_CAUSES	ST19	Effects of other external causes
0.194841	0.0938754	2.07553	0.0379373	0.581108	81	453652	1.21512	LICHENOID_DRUG_REACTION	L12	Lichenoid drug reaction
0.0398088	0.0191868	2.0748	0.0380052	0.513447	2459	288472	1.04061	K11_JAWS	K11	Other diseases of jaws
0.0356892	0.0172039	2.07448	0.0380347	0.508698	3082	420006	1.03633	VWXY20_DRUGS_MEDICAM_BIOLO_SUBST_CAUSI_ADVER_EFFEC_THERAPE_USE	VWXY20	Drugs, medicaments and biological substances causing adverse effects in therapeutic use
0.0480156	0.0231534	2.0738	0.0380978	0.515269	1605	344132	1.04919	C3_MENINGIOMA_EXALLC	C3	Brain meningioma
0.0270076	0.0130266	2.07326	0.0381482	0.506534	5683	437390	1.02738	ST19_SUPERF_INJURY_ABDOMEN_LOWER_BACK_PELVIS	ST19	Superficial injury of abdomen, lower back and pelvis
0.129095	0.0624083	2.06855	0.038588	0.543945	196	439424	1.1378	M13_MULTIFIBRO	M13	Multifocal fibrosclerosis
-0.0266494	0.0128953	-2.06659	0.0387725	0.494666	5820	345118	0.973703	C3_LUNG_NONSMALL_EXALLC	C3	Non-small cell lung cancer
0.0787769	0.0382063	2.06189	0.0392187	0.520584	598	453135	1.08196	K11_RETROG_MAXILLAE	K11	Maxillary retrognathism
0.0102538	0.00497443	2.06129	0.039275	0.499945	46755	322314	1.01031	M13_SPONDYLOPATHY	M13	Spondylopathies
0.119827	0.0581324	2.06127	0.0392774	0.538304	222	453511	1.1273	DRUGADVERS_SYSTEMIC_LUPUS_ERYTHEMAT	M13	Drug-induced systemic lupus erythematosus
0.0535673	0.0260036	2.05999	0.0393992	0.509975	1333	431119	1.05503	H8_NOISEINNER	H8	Noise effects on inner ear
-0.030743	0.0149434	-2.0573	0.0396576	0.493348	4271	198795	0.969725	CD2_BENIGN_BREAST_EXALLC	CD2	Benign neoplasm of breast
0.0407825	0.019831	2.0565	0.0397339	0.5137	2257	451118	1.04163	REAC_ARTHRO_NOS	RHEUMA	Other/unspecified reactive arthropathies
0.0405225	0.0197608	2.05065	0.0403015	0.509228	2326	432955	1.04135	H7_PARASTRAB	H7	Paralytic strabismus
0.0838593	0.0409002	2.05034	0.0403315	0.524007	481	453252	1.08748	C3_OROPHARYNX	C3	Malignant neoplasm of oropharynx
0.0180225	0.0087982	2.04843	0.040518	0.503605	12933	440800	1.01819	KRA_PSY_ANYMENTAL_SUICID_PREG_NERV	KRA_PSY	Any mental disorder, or suicide (or attempt), or psychic disorders complicating pregnancy, partum or puerperium or nerve system disorders
0.0476776	0.0232953	2.04666	0.0406915	0.51091	1698	141300	1.04883	N14_IMPOTENCE	N14	Impotence
-0.0342839	0.01676	-2.04558	0.0407975	0.491668	3328	345118	0.966297	C3_RECTUM_ADENO_MUCINO_EXALLC	C3	Adenocarcinoma, papilloma adenocarcinoma and mucinous carcinomas of rectum
0.125759	0.0615072	2.04462	0.0408926	0.536248	204	453529	1.13401	K11_MANDIBULAR_HYPOPL	K11	Mandibular hypoplasia
0.206029	0.100785	2.04424	0.0409298	0.571208	73	434894	1.22879	E4_DYSPOLYGL	E4	Polyglandular dysfunction
0.0347227	0.0169905	2.04365	0.0409883	0.510024	3101	415845	1.03533	K11_APPENDOTH	K11	Other appendicitis
-0.0133602	0.00653781	-2.04353	0.0409998	0.495177	36601	141300	0.986729	N14_PROSTHYPERPLA	N14	Hyperplasia of prostate
0.0220065	0.0107879	2.03993	0.0413575	0.504828	8946	384436	1.02225	Z21_PRESENCE_OTH_DEVICES	Z21	Presence of other devices
0.206696	0.101344	2.03955	0.0413951	0.567068	70	384093	1.22961	E4_MINERAL_METNAS	E4	Disorder of mineral metabolism, other/unspecified
0.107729	0.0528429	2.03867	0.0414827	0.532465	281	453452	1.11375	CD2_PRIMARY_LYMPHOID_HEMATOPOIETIC_NAS	CD2	Other and unspecified malignant neoplasms of lymphoid, haematopoietic and related tissue
-0.0234871	0.0115327	-2.03657	0.041693	0.491947	7284	446449	0.976787	C3_COLORECTAL_ADENO	C3	Colorectal adenocarcinoma
0.0532431	0.0261808	2.03367	0.0419849	0.515978	1266	448708	1.05469	H7_EYEADNEXOTH	H7	Other specified and unspecified disorders of eye and adnexa
-0.0621052	0.0305563	-2.03248	0.0421047	0.475812	956	345109	0.939784	CD2_INSITU_BLADDER_EXALLC	CD2	Carcinoma in situ, bladder
0.0280958	0.0138298	2.03154	0.0421999	0.508554	5370	366465	1.02849	J10_LARYNGITIS	J10	Acute laryngitis and tracheitis
0.0220021	0.0108307	2.03145	0.0422089	0.506037	8302	440626	1.02225	U22_COVID19_CONFIRMED	U22	Covid-19 confirmed case
-0.0164413	0.00809544	-2.03094	0.0422614	0.493786	15186	438547	0.983693	CD2_BENIGN_SKIN	CD2	Other benign neoplasms of skin
0.0125275	0.00617062	2.03018	0.042338	0.501703	27825	425908	1.01261	OFFICIAL_TILASTOKESKUS	ALCO	Alcohol related diseases, tilastokeskus definition
0.0113591	0.00559571	2.02996	0.0423605	0.500114	38606	387841	1.01142	K11_HERING	K11	Inguinal hernia
0.0235341	0.0115963	2.02945	0.042412	0.506944	7161	255273	1.02381	ABDOM_HERNIA_POSTOP	K11	Hernia of abdominal wall, postoperative
0.0495216	0.0244089	2.02883	0.0424751	0.512244	1535	397685	1.05077	R18_SOMNO_STUPOR_COMA	R18	Somnolence, stupor and coma
-0.0907142	0.0447186	-2.02855	0.0425037	0.471472	486	452317	0.913279	F5_OTHRET	F5	Other and unspecified mental retardation
0.0792418	0.0390775	2.02781	0.0425795	0.524308	540	412885	1.08247	H7_LACRIMINFLAMACU	H7	Inflammation of lacrimal passages (acute and unspecified)
-0.159586	0.0787338	-2.0269	0.0426723	0.430194	120	345118	0.852497	C3_MACROGLOBULINEMIA_EXALLC	C3	Waldenstrom macroglobulinemia, lymphoplasmacytic lymphoma
0.0202108	0.0099717	2.02681	0.0426815	0.503442	10134	378292	1.02042	J10_INFLUENZA	J10	All influenza
0.0227448	0.0112281	2.0257	0.0427955	0.508264	7588	442447	1.02301	ST19_ADVER_EFFEC_NOT_ELSEW_CLASSIFIED	ST19	Adverse effects, not elsewhere classified
0.0649828	0.0321235	2.0229	0.0430831	0.520694	841	360393	1.06714	K11_VOLVU	K11	Volvulus
0.0330964	0.0163658	2.02229	0.0431461	0.507518	3730	314967	1.03365	R18_CARDIAC_MURMU_OTHER_CARDIAC_SOUNDS	R18	Cardiac murmurs and other cardiac sounds
0.0191345	0.00946952	2.02064	0.0433168	0.505012	10730	326530	1.01932	M13_SOFTOVERUSE	M13	Soft tissue disorders related to use, overuse and pressure
0.125853	0.0622838	2.02063	0.0433176	0.538523	198	432686	1.13412	L12_NAIL_DYSTROPHY	L12	Nail dystrophy
0.0836526	0.0414031	2.02044	0.0433377	0.528668	479	329493	1.08725	RX_MORPHIN	RX	Morphin
-0.0511772	0.0253385	-2.01974	0.0434108	0.47832	1354	452379	0.95011	C3_KIDNEY_CLEAR_CELL_CARCINOMA	C3	Clear cell adenocarcinoma of kidney
0.0173189	0.00857973	2.01858	0.0435304	0.496818	16902	436831	1.01747	G6_AD_WIDE	G6	Alzheimer‚Äôs disease, wide definition
-0.0157266	0.00779447	-2.01767	0.043626	0.496725	18260	119468	0.984396	N14_ENDOMETRIOSIS	N14	Endometriosis
0.0390605	0.019374	2.01614	0.0437859	0.508114	2436	451297	1.03983	OFFICIAL_TILASTOKESKUS_DEATH	ALCO	Alcohol related diseases, tilastokeskus definition, death only
0.0114853	0.00569671	2.01613	0.0437868	0.502937	33041	420692	1.01155	ST19_INJURI_ELBOW_FOREA	ST19	Injuries to the elbow and forearm
-0.0770632	0.0382375	-2.01538	0.0438646	0.477185	591	344987	0.925831	CD2_INSITU_SKIN_UPPERLIMB_EXALLC	CD2	Carcinoma in situ of skin of upper limb, including shoulder
0.0330898	0.0164458	2.01206	0.0442136	0.509327	3353	450380	1.03364	CD2_BENIGN_SALIVARY	CD2	Benign neoplasm of major salivary glands
-0.0493112	0.0245355	-2.00979	0.0444533	0.483888	1480	345118	0.951885	CD2_MULTIPLE_MYELOMA_PLASMA_CELL_EXALLC	CD2	Multiple myeloma and malignant plasma cell neoplasms
0.0835529	0.041581	2.0094	0.0444948	0.526741	472	403864	1.08714	ST19_COMPLICATIO_FOLLOWI_INFUS_TRANSFU_THERAPE_INJEC	ST19	Complications following infusion, transfusion and therapeutic injection
0.04564	0.0227211	2.00871	0.0445684	0.511439	1677	399163	1.0467	SCND_OTH_KNEEARTHROSIS	RHEUMA	Other secondary gonarthrosis
0.0313618	0.0156215	2.00761	0.0446851	0.503941	4083	420324	1.03186	I9_ABAORTANEUR	I9	Abdominal aortic aneurysm (AAA)
-0.0162519	0.00811037	-2.00384	0.0450873	0.49478	15418	438315	0.983879	C3_DIGESTIVE_ORGANS	C3	Malignant neoplasm of digestive organs
0.107274	0.0535601	2.00287	0.0451912	0.533259	262	452978	1.11324	SYSTSCLE_STRICT	RHEUMA	Systemic sclerosis,strict definition
0.0196477	0.00982215	2.00035	0.0454624	0.506888	10268	244350	1.01984	N14_CERVICAL_DYSPLASIA_ALL	N14	All dysplastic lesions of the cervix uteri
0.0324593	0.0162291	2.00007	0.0454924	0.508998	3448	403864	1.03299	ST19_OTHER_COMPLICATIO_SURGI_MEDICAL_CARE_NOT_ELSEW_CLASSIFIED	ST19	Other complications of surgical and medical care, not elsewhere classified
0.0288143	0.0144284	1.99706	0.0458187	0.507657	4450	412885	1.02923	H7_EYELIDINFLAMMATION	H7	Other inflammation of eyelid
0.0219693	0.0110033	1.99661	0.0458674	0.50298	7921	439540	1.02221	G6_XTRAPYROTH	G6	Other extrapyramidal and movement disorders in other diseases
0.152321	0.0763055	1.9962	0.0459118	0.558977	141	432149	1.16453	H7_COULOURVISDEF	H7	Colour vision deficiencies
0.197412	0.0989006	1.99606	0.0459269	0.558565	75	453658	1.21825	VWXY20_EXPOS_SUNLI	VWXY20	Exposure to sunlight
0.0557484	0.0279325	1.99583	0.0459529	0.514403	1165	249893	1.05733	ST19_TRAUMAT_SUBAR_HAEMORRHAGE	ST19	Traumatic subarachnoid haemorrhage
0.0775988	0.0389518	1.99218	0.0463515	0.523635	554	424573	1.08069	E4_VIT_D_DEF	E4	Vitamin D deficiency
0.0739126	0.0371109	1.99167	0.0464074	0.521651	591	453142	1.07671	BRUXISM	DENTAL	Bruxism
0.121869	0.0612504	1.98968	0.0466262	0.537544	210	403864	1.12961	ST19_COMPLICATIO_PECUL_REATTACHM_AMPUT	ST19	Complications peculiar to reattachment and amputation
0.220729	0.110951	1.98943	0.0466534	0.565991	73	453331	1.24699	P16_FET_NEWB_OTH_COMPLICATIO_LABOUR_DELIV	P16	Fetus and newborn affected by other complications of labour and delivery
0.0673613	0.0338685	1.98891	0.0467116	0.519672	741	368973	1.06968	N14_URETHRITISANDURSYNDR	N14	Urethritis and urethral syndrome
0.0258663	0.0130071	1.98862	0.0467428	0.50795	5624	443934	1.0262	ST19_FOREI_BODY_EXTER_EYE	ST19	Foreign body on external eye
0.0193394	0.0097337	1.98685	0.0469393	0.50408	10414	443319	1.01953	Z21_SPEECH_THERAPY	Z21	Speech therapy
0.0384428	0.0193553	1.98617	0.0470147	0.51096	2359	438050	1.03919	L12_URTICA_DERTMATOG	L12	Dermatographic urticaria
0.0377323	0.0190231	1.9835	0.0473116	0.51074	2594	451139	1.03845	VWXY20_CRUSHED_PUSHED_STEPP_CROWD_HUMAN_STAMP	VWXY20	Crushed, pushed or stepped on by crowd or human stampede
0.0114423	0.00576934	1.98329	0.0473349	0.503387	31371	422362	1.01151	R18_SYMPTOMS_SIGNS_INVOLVI_SKIN_SUBCU_TISSUE	R18	Symptoms and signs involving the skin and subcutaneous tissue
-0.0433798	0.0218813	-1.9825	0.0474229	0.486302	1830	439540	0.957548	G6_DYSTON	G6	Dystonia
0.026916	0.0135813	1.98184	0.0474969	0.506364	5025	420006	1.02728	VWXY20_MISAD_PATIENTS_SURGI_MEDICAL_CARE	VWXY20	Misadventures to patients during surgical and medical care
0.0426256	0.0215151	1.9812	0.0475688	0.511863	2082	432955	1.04355	H7_INTERHETEROTRO	H7	Intermittent heterotropia
0.168153	0.0849518	1.97939	0.047772	0.552766	106	452234	1.18312	ST19_BURN_CORROSION_OTHER_INTERNAL_ORGANS	ST19	Burn and corrosion of other internal organs
0.0270194	0.0136797	1.97515	0.0482514	0.502388	5150	448583	1.02739	G6_PARKINSON	G6	Parkinson's disease
-0.0337448	0.0170874	-1.97484	0.0482865	0.49182	3194	345118	0.966818	C3_RECTUM_ADENO_EXALLC	C3	Adenocarcinoma and papilloma adenocarcinoma of rectum
0.0365184	0.0185271	1.97108	0.0487147	0.510345	2606	451127	1.03719	CD2_BENIGN_PAROTID	CD2	Benign neoplasm: Parotid gland
0.0209842	0.0106578	1.96891	0.0489639	0.507314	8626	341884	1.02121	G6_MIGRAINE_NO_AURA	G6	Migraine without aura
0.0861408	0.0437516	1.96886	0.0489692	0.52943	439	437390	1.08996	ST19_OTHER_UNSPE_INJURI_ABDOMEN_LOWER_BACK_PELVIS	ST19	Other and unspecified injuries of abdomen, lower back and pelvis
0.0287047	0.0145865	1.96789	0.0490807	0.506061	4460	420324	1.02912	I9_THAORTANEUR	I9	Thoracic aortic aneurysm
-0.0434797	0.0221069	-1.96679	0.049207	0.480549	1772	322314	0.957452	M13_SPONDYLINFLAMNAS	M13	Other specified/unspecified inflammatory spondylopathies
0.0934233	0.047542	1.96507	0.049406	0.524093	379	412105	1.09793	I9_CERATHER	I9	Cerebral atherosclerosis
0.0347117	0.0176828	1.96302	0.0496436	0.506092	2940	429522	1.03532	AMN2	NEURO	Transient global amnesia
-0.183722	0.0936224	-1.96237	0.0497196	0.433041	95	453540	0.832167	P16_BIRTHINJY_PERIP_NERVOUS_SYSTEM	P16	Birth injury to peripheral nervous system
0.0575066	0.0293762	1.95759	0.050278	0.51724	982	438050	1.05919	L12_ERYTHEMANODOSUM	L12	Erythema nodosum
0.0286346	0.0146516	1.95437	0.0506574	0.504731	4247	426283	1.02905	R18_ABNORMAL_FINDI_DIAGNOST_IMAGI_OTHER_BODY_STRUCTURES	R18	Abnormal findings on diagnostic imaging of other body structures
0.0874737	0.044797	1.95267	0.0508585	0.528863	388	326530	1.09141	M13_CALCANSPUR	M13	Calcaneal spur
0.135931	0.0696984	1.95027	0.0511435	0.544714	166	453567	1.1456	VWXY20_SAIRAALO_LIITTYVAT_TAPATURMAT	VWXY20	Nosocomial condition (hospital)
0.0714726	0.0366712	1.94901	0.0512943	0.520811	651	198464	1.07409	CD2_BENIGN_MALE_GEN	CD2	Benign neoplasm of male genital organs
0.0305869	0.0156979	1.94847	0.0513593	0.511388	3769	449964	1.03106	VWXY20_UNSPE_PRIVA	VWXY20	Unspecified privation
0.0294157	0.0151036	1.9476	0.0514634	0.502547	4196	449537	1.02985	PDMED_LEVODOPA_DECARBOXYLASEINHIBITOR	RX	Use of levodopa decarboxylase inhibitor
0.0211405	0.0108758	1.94382	0.0519173	0.504778	9227	444506	1.02137	K11_ANOMALI_DENTAL_ARCH_RELATIONS1	K11	Anomalies of dental arch relationship, including avohilmo
0.0153715	0.00791459	1.94217	0.0521166	0.497058	20667	428053	1.01549	F5_DEMENTIA	F5	Dementia
0.192377	0.0990585	1.94205	0.0521312	0.563409	71	453662	1.21213	VWXY20_ACCIDENTAL_POISO_EXPOS_PESTI	VWXY20	Accidental poisoning by and exposure to pesticides
0.0377793	0.0194909	1.93831	0.052586	0.500234	2700	441967	1.0385	AD_AM	NEURO	Alzheimer‚Äôs disease (Atypical or mixed)
0.105003	0.0541759	1.9382	0.0525993	0.534548	273	254345	1.11071	C3_OVARY_ENDOMETROID	C3	Endometroid carcinoma of ovary
0.11697	0.0603751	1.93739	0.0526973	0.535095	213	439424	1.12409	M13_POLNODOSA	M13	Polyarteritis nodosa
-0.103885	0.0536416	-1.93664	0.0527889	0.459455	278	453455	0.901329	CD2_IMMUNOPROLIFERATIVE	CD2	Malignant immunoproliferative diseases
0.0337302	0.0174203	1.93626	0.0528363	0.51351	3065	288472	1.03431	K11_STOMATITIS	K11	Stomatitis and related lesions
0.00936745	0.00483844	1.93605	0.0528616	0.501257	48836	404897	1.00941	M13_ARTHROSIS_KNEE_PRIM_ICD10	M13	Gonarthrosis,primary
0.0136411	0.00704966	1.93501	0.0529892	0.502272	20778	432955	1.01373	H7_OCUMUSCLE	H7	Disorders of ocular muscles, binocular movement, accommodation and refraction
0.0485895	0.0251238	1.93401	0.0531125	0.509516	1416	430250	1.04979	H7_GLAUCCLOSEPRIM	H7	Primary angle-closure glaucoma
-0.0288286	0.0149172	-1.93257	0.0532894	0.490728	4160	342830	0.971583	CD2_BENIGN_MELANOCYTIC_TRUNK_EXALLC	CD2	Melanocytic naevi of trunk
0.084492	0.0437262	1.9323	0.0533228	0.528573	421	429396	1.08816	H7_CORNEALDYSTROPHY	H7	Corneal degeneration
0.0179751	0.00930581	1.9316	0.0534088	0.497344	13389	440344	1.01814	G6_NEURODEG	G6	Other degenerative diseases of the nervous system
0.0252342	0.013068	1.931	0.0534834	0.507952	5280	326530	1.02556	M13_LATERALEPICOND	M13	Lateral epicondylitis
0.117994	0.0611676	1.92903	0.0537278	0.536274	213	412885	1.12524	H7_ORBITINFLAMACU	H7	Acute inflammation of orbit
-0.0091205	0.00473087	-1.92787	0.0538714	0.499015	53469	400264	0.990921	E4_PCOS_CONSORTIUM_EXCLUSIONS	E4	Exclusions for E4_PCOS_CONSORTIUM
0.070563	0.0366069	1.92759	0.0539065	0.520792	609	448592	1.07311	J10_RESPCONDEXT	J10	Respiratory conditions due to other external agents
0.0812869	0.0421961	1.92641	0.0540535	0.523749	524	434894	1.08468	E4_DISPUB	E4	Disorders of puberty
0.0711505	0.0369395	1.92613	0.0540878	0.520576	624	403864	1.07374	ST19_COMPLICATIO_CARDIAC_VASCULAR_PROSTHET_DEVICES_IMPLANTS_GRAFTS	ST19	Complications of cardiac and vascular prosthetic devices, implants and grafts
-0.0222252	0.0115421	-1.92558	0.0541562	0.496124	7497	345118	0.97802	C3_BRONCHUS_LUNG_EXALLC	C3	Malignant neoplasm of bronchus and lung
0.0938485	0.0487438	1.92534	0.0541866	0.528894	333	326530	1.09839	M13_SYNOHYPERTROPH	M13	Synovial hypertrophy, not elsewhere classified
-0.0916274	0.0476295	-1.92375	0.0543856	0.471719	359	345020	0.912445	CD2_INSITU_MELANOMA_TRUNK_EXALLC	CD2	Melanoma in situ of trunk
0.114619	0.0596298	1.92217	0.0545841	0.527559	233	451642	1.12145	R18_UNATTE_DEATH	R18	Unattended death
0.0106317	0.0055418	1.91845	0.0550541	0.504874	36563	417170	1.01069	K11_CARIES_2_ONLYAVO	K11	Dental caries 2, only avohilmo
0.0170881	0.00890977	1.9179	0.0551232	0.505976	12694	441039	1.01723	AB1_OTHER_VIRAL	AB1	Other viral diseases
0.0120208	0.00627094	1.9169	0.0552501	0.502034	27791	330460	1.01209	KRA_PSY_SUBSTANCE_EXMORE	KRA_PSY	Substance abuse
0.0556533	0.0290579	1.91526	0.0554595	0.51848	987	326530	1.05723	M13_OVERUSENAS	M13	Other/unspecified soft tissue disorders related to use, overuse and pressure
0.0399569	0.0208935	1.91241	0.0558238	0.510129	2041	384093	1.04077	E4_CA_MET	E4	Disorders of calcium metabolism
0.0744579	0.0389477	1.91174	0.0559094	0.523776	572	447467	1.0773	J10_PULMOEDEMA	J10	Pulmonary oedema
0.0181944	0.00954941	1.90529	0.0567419	0.50069	12164	365977	1.01836	I9_NONISCHCARDMYOP	I9	Non-ischemic cardiomyopathy
0.0483499	0.0253773	1.90524	0.0567486	0.504173	1433	431048	1.04954	I9_VASCSYND	I9	Vascular syndromes of brain in cerebrovascular disorders
0.0378488	0.0198727	1.90456	0.0568375	0.511865	2355	434894	1.03857	E4_HYPOPIT	E4	Hypopituitarism
0.048041	0.0252466	1.90287	0.0570574	0.50464	1433	420369	1.04921	G6_VASCSYND	G6	Vascular syndromes of brain in cerebrovascular disorders
0.0815245	0.0429365	1.89872	0.0576008	0.524089	434	453299	1.08494	C3_TONSIL	C3	Malignant neoplasm of tonsil
0.0246988	0.0130091	1.89858	0.0576195	0.506666	5531	385381	1.02501	ST19_INJURY_MUSCLE_TENDON_LOWER_LEG_LEVEL	ST19	Injury of muscle and tendon at lower leg level
0.00925328	0.00487786	1.897	0.0578285	0.504159	49076	404657	1.0093	MIGRAINE_TRIPTAN	NEURO	Migraine, single triptan purchase ok & required. ICD-code if available is included
0.00925328	0.00487786	1.897	0.0578285	0.504159	49076	404657	1.0093	TRIPTAN1	RX	Triptan medication for migraine, single purchase ok
0.122735	0.0647035	1.89688	0.0578434	0.541634	192	141300	1.13058	N14_MALEGENINOTH	N14	Disorders of male genital organs in diseases classified elsewhere
0.0336926	0.0177945	1.89343	0.0583013	0.505691	3013	430206	1.03427	MEMLOSS	NEURO	Memory loss
0.137062	0.0724001	1.89313	0.0583412	0.546479	142	412885	1.1469	H7_ORBITNAS	H7	Other and unspecified disorders of orbit
0.0136436	0.00721039	1.89221	0.058463	0.503028	19486	341884	1.01374	G6_HEADACHE	G6	Other headache syndromes
0.14947	0.0790072	1.89186	0.0585099	0.54599	119	453614	1.16122	C3_GUM	C3	Malignant neoplasm of gum
-0.0870871	0.0460561	-1.89089	0.0586388	0.466431	378	345118	0.916597	C3_GBM_EXALLC	C3	Brain glioblastoma
0.21007	0.111224	1.88872	0.0589296	0.578478	63	384436	1.23376	Z21_FAMILY_HISTORY_MENTAL_BEHAVIOURAL_DISORD	Z21	Family history of mental and behavioural disorders
0.122354	0.0647987	1.88821	0.0589973	0.531178	192	397865	1.13015	H8_OTORRHAGIA	H8	Otorrhagia
0.0984299	0.0522466	1.88395	0.0595719	0.531787	293	453440	1.10344	ALCOPOLYNEU	ALCO	Alcohol induced polyneuropathy
0.0455909	0.0242033	1.88367	0.0596098	0.511106	1484	448691	1.04665	M13_BIOMECHLESIO	M13	Biomechanical lesions, not elsewhere classified
0.0982925	0.0522248	1.8821	0.0598219	0.532053	293	445865	1.10329	G6_ALCOPOLY	G6	Alcohol induced polyneuropathy
0.0709992	0.0377317	1.88169	0.0598787	0.517989	588	436431	1.07358	Z21_NEED_IMMUNI_OTH_SINGLE_VIRAL_DISEA	Z21	Need for immunization against other single viral diseases
0.0244526	0.0129987	1.88115	0.0599513	0.503797	5713	428311	1.02475	J10_ACUTELOWERNAS	J10	Unspecified acute lower respiratory infection
0.0405749	0.0215818	1.88005	0.060101	0.514819	1879	382065	1.04141	Z21_CONVALESCENCE	Z21	Convalescence
0.00822071	0.00437407	1.87942	0.0601877	0.501744	61228	392505	1.00825	ST19_INJURI_HEAD	ST19	Injuries to the head
-0.147729	0.0786505	-1.87829	0.0603411	0.432347	120	453613	0.862665	C3_MACROGLOBULINEMIA	C3	Waldenstrom macroglobulinemia, lymphoplasmacytic lymphoma
0.202626	0.107944	1.87713	0.0604997	0.569863	66	429396	1.22461	H7_ADHESIOIRIS	H7	Pupillary membranes and other adhesions and disruptions of iris and ciliary body
0.025182	0.0134421	1.87337	0.0610173	0.501538	5349	448384	1.0255	G6_PARKINSON_INCLAVO	G6	Parkinson's disease, including avohilmo
0.0157015	0.00838341	1.87293	0.061078	0.5041	14612	436431	1.01583	Z21_CONTACT_W_EXPOS_COMMUNICAB_DISEA	Z21	Contact with and exposure to communicable diseases
0.0184448	0.00984879	1.8728	0.0610966	0.503399	10214	441041	1.01862	F5_PERSONALITY	F5	Specific personality disorders
0.0126573	0.00676591	1.87075	0.0613804	0.504199	26066	119468	1.01274	N14_MENORRHAGIA	N14	Menorrhagia
0.0882332	0.0472005	1.86933	0.0615775	0.523879	379	453354	1.09224	I9_CEREBATHER	I9	Cerebral atherosclerosis
0.064146	0.0343935	1.86506	0.062173	0.518118	707	453026	1.06625	ALLERGIC_CONTACT_DERMA_DRUGS_CONTACT_W_SKIN	L12	Allergic contact dermatitis due to drugs in contact with skin
0.041606	0.0223112	1.8648	0.0622089	0.513323	1775	326530	1.04248	M13_SOFTTISSUENAS	M13	Other specified/unspecified soft tissue disorders
-0.0239281	0.0128567	-1.86113	0.0627254	0.49315	5727	233585	0.976356	N14_LUMPNASBREAST	N14	Unspecified lump in breast
0.0482913	0.0259803	1.85877	0.0630604	0.511409	1339	420112	1.04948	ST19_CONTU_ANKLE	ST19	Contusion of ankle
-0.0205904	0.0110786	-1.85857	0.0630886	0.48982	7835	423041	0.97962	L12_SEBORRKERAT	L12	Seborrhoeic keratosis
-0.0394043	0.021279	-1.85179	0.0640553	0.49221	2007	251656	0.961362	Q17_CONGEN_MALFO_OVARIES_FALLOP_TUBES_BROAD_LIGAM	Q17	Congenital malformations of ovaries, fallopian tubes and broad ligaments
0.0531562	0.0287508	1.84886	0.0644779	0.510812	1084	433177	1.05459	ST19_OPEN_WOUND_HIP_THIGH	ST19	Open wound of hip and thigh
0.0929142	0.0502636	1.84854	0.0645246	0.525998	315	453418	1.09737	PDMED_ROTIGOTINE	RX	Use of rotigotine
0.0410805	0.0222305	1.84793	0.0646122	0.509739	1744	429396	1.04194	H7_EPISCLERITIS	H7	Episcleritis
0.0976185	0.0528638	1.8466	0.0648046	0.53013	281	345118	1.10254	CD2_PRIMARY_LYMPHOID_HEMATOPOIETIC_NAS_EXALLC	CD2	Other and unspecified malignant neoplasms of lymphoid, haematopoietic and related tissue
0.0112245	0.00608132	1.84573	0.0649309	0.502152	28818	287796	1.01129	M13_MENISCUSDERANGEMENTS	M13	Meniscus derangement
-0.0206881	0.0112174	-1.84429	0.0651408	0.487925	8409	439144	0.979524	F5_PSYCHOTH	F5	Other and unspecified nonorganic psychotic disorders
0.0116123	0.00630189	1.84267	0.0653776	0.504284	26125	427608	1.01168	H7_ALLERGICCONJUNCTIVITIS	H7	Allergic conjunctivitis
0.0836516	0.0454099	1.84214	0.0654543	0.537355	388	446523	1.08725	D3_IMMUDEFANTIBODYNAS	D3	Other and unspecified immunodeficiencies with predominantly antibody defects
0.094066	0.051109	1.8405	0.0656953	0.531906	301	453432	1.09863	K11_OPEN_BITE_SURGERY	K11	Open bite that required surgery (Lefort1 or BSSRO)
0.117045	0.0636027	1.84025	0.0657314	0.536053	195	342690	1.12417	I9_CARDMSEC	I9	Cardiomyopathies, Secondary/extrinsic
0.0276085	0.015013	1.83898	0.0659188	0.504967	4197	449536	1.02799	ST19_TOXIC_EFFEC_SUBST_CHIEF_NONME_SOURCE	ST19	Toxic effects of substances chiefly nonmedicinal as to source
0.0532815	0.029008	1.83679	0.0662412	0.51056	1019	452714	1.05473	PDMED_ROPINIROLE	RX	Use of ropinirole
-0.0285787	0.01556	-1.83669	0.0662564	0.486849	3862	449871	0.971826	CD2_BENIGN_SKIN_FACE	CD2	Benign neoplasm: Skin of other and unspecified parts of face
0.137027	0.0746356	1.83595	0.0663654	0.560914	130	385630	1.14686	E4_THYROIDITACU	E4	Acute thyroiditis
-0.0182451	0.00994135	-1.83528	0.0664644	0.494787	9759	443974	0.98192	K11_IBD_STRICT	K11	Inflammatory bowel disease, strict (require KELA)
0.0311606	0.016989	1.83416	0.0666298	0.507557	3158	234147	1.03165	O15_GESTAT_OEDEM_PREINUR	O15	Gestational [pregnancy-induced] oedema and proteinuria without hypertension
-0.0535601	0.0292032	-1.83405	0.066647	0.479448	1052	345099	0.947849	CD2_INSITU_OTHER_NOS_EXALLC	CD2	Carcinoma in situ of other and unspecified sites
0.0341825	0.0186622	1.83165	0.0670041	0.50818	2595	451138	1.03477	AB1_VIRAL_CNS	AB1	Viral infections of the central nervous system
0.0153621	0.00838971	1.83106	0.0670918	0.497038	18216	330460	1.01548	KRA_PSY_DEMENTIA_EXMORE	KRA_PSY	Any dementia
0.0293984	0.0160745	1.82888	0.0674175	0.506722	3677	403936	1.02983	AB1_SEPSIS_BACT_EXPL	AB1	Explicit bacterial Sepsis
0.0207237	0.0113369	1.82798	0.067552	0.500869	7423	385630	1.02094	E4_GOITREMULTINOD	E4	Nontoxic multinodular goitre
0.0328994	0.0180148	1.82624	0.0678134	0.50753	2799	450934	1.03345	VWXY20_OTHER_UNSPE_DRUGS_MEDICAM	VWXY20	Other and unspecified drugs and medicaments
0.0594436	0.0325511	1.82617	0.0678253	0.516073	798	420112	1.06125	ST19_INJURY_MUSCLE_TENDON_ANKLE_FOOT_LEVEL	ST19	Injury of muscle and tendon at ankle and foot level
0.0331173	0.018139	1.82574	0.0678888	0.506013	2811	450922	1.03367	AB1_TUBERCULOSIS	AB1	Tuberculosis
0.0177843	0.0097419	1.82554	0.067919	0.500454	10294	384681	1.01794	COMB_ORAL_GLUCLOW	RX	Combinations of oral blood glucose lowering drugs
0.0761323	0.0417125	1.82517	0.0679758	0.522805	476	431119	1.07911	H8_VERTIGOCENT	H8	Vertigo of central origin
0.0840186	0.0460452	1.8247	0.0680465	0.530392	381	450415	1.08765	H7_OPTICDISCOTH	H7	Other disorders of optic disc
0.160622	0.0880414	1.82439	0.068093	0.565233	94	453639	1.17424	PHLEBI_THROMBOP_SUPERF_VESSE_LOWER_EXTREMITI	I9	Phlebitis and thrombophlebitis of superficial vessels of lower extremities, drug-induced
0.0332766	0.0182447	1.8239	0.0681668	0.515731	2694	450923	1.03384	AB1_SPIROCHE_OTHER	AB1	Spirochaetal infections, other/unspecified
0.0327353	0.0179499	1.8237	0.0681975	0.508181	2819	450914	1.03328	C3_HEAD_AND_NECK	C3	Malignant neoplasm of head and neck
0.0413751	0.0227055	1.82225	0.0684173	0.5116	1780	443934	1.04224	ST19_FOREI_BODY_ALIME_TRACT	ST19	Foreign body in alimentary tract
0.0117931	0.00647338	1.82178	0.0684888	0.501829	24337	429396	1.01186	H7_SCLERACORNEA	H7	Disorders of sclera, cornea, iris and ciliary body
0.0310717	0.0170599	1.82133	0.0685563	0.507516	3125	432149	1.03156	H7_VISDISTNAS	H7	Other and unspecified visual disturbances
0.117511	0.0646009	1.81904	0.0689058	0.531483	194	441041	1.12469	F5_PERSOTH	F5	Other and unspecified disorders of adult personality and behaviour
0.0550413	0.0302635	1.81874	0.0689516	0.513947	914	395832	1.05658	G6_MONOLOWOTHUNS	G6	Other and unspecified mononeuropathies of lower limb
0.0639843	0.0352145	1.81699	0.0692189	0.517783	698	413784	1.06608	H7_OTHRETARTOCC	H7	Other retinal artery occlusion
0.0416054	0.0229049	1.81644	0.0693029	0.513168	1638	326530	1.04248	M13_BICIPITALTEND	M13	Bicipital tendinitis
-0.0349575	0.0192582	-1.8152	0.069493	0.486268	2574	451159	0.965646	C3_BLADDER	C3	Malignant neoplasm of bladder
0.053102	0.0292867	1.81318	0.0698043	0.514204	1017	432955	1.05454	H7_PARASTRA6	H7	Sixth [abducent] nerve palsy
0.0292653	0.016156	1.81142	0.0700758	0.507277	3553	426987	1.0297	L12_INFECT_SKIN_OTHER	L12	Other local infections of skin and subcutaneous tissue
0.0799489	0.0441829	1.8095	0.0703733	0.527848	403	449186	1.08323	ULCER_ARTHR	RHEUMA	Arthropathy in ulcerative colitis
0.0334116	0.0184742	1.80856	0.0705199	0.51162	2615	341375	1.03398	RHEUMA_ARHTROPAT_REACTIVE	RHEUMA	Reactive arthropathies, FINNGEN
-0.0301402	0.0166907	-1.80581	0.0709478	0.488652	3318	450415	0.970309	C3_URINARY_TRACT	C3	Malignant neoplasm of urinary organs
0.0312501	0.017309	1.80542	0.0710083	0.508393	3129	434312	1.03174	F5_MENTALUNSPE	F5	Mental disorders, not otherwise specified
-0.0242552	0.0134369	-1.80512	0.0710564	0.491469	5284	448449	0.976037	C3_COLON	C3	Malignant neoplasm of colon
0.0332519	0.018438	1.80345	0.0713178	0.505918	2719	443701	1.03381	IBD_TUBERCULOSIS	AB1	Tuberculosis, IBD comorbidity
0.018191	0.0100899	1.8029	0.0714039	0.505241	9521	444212	1.01836	VWXY20_FALL_STAIRS_STEPS	VWXY20	Fall on and from stairs and steps
0.0738342	0.0409531	1.80289	0.0714047	0.52172	481	345118	1.07663	C3_OROPHARYNX_EXALLC	C3	Malignant neoplasm of oropharynx
0.0783012	0.0434333	1.80279	0.0714209	0.527745	425	384093	1.08145	E4_IRON_MET	E4	Disorders of iron metabolism
0.015481	0.00859621	1.80091	0.071717	0.506114	13701	440032	1.0156	VWXY20_STRIK_STRUCK_OTHER_OBJEC	VWXY20	Striking against or struck by other objects
-0.0563051	0.0312971	-1.79905	0.0720107	0.483463	893	226439	0.945251	N14_BARTHOABSCESS	N14	Abscess of Bartholin gland
0.0261344	0.0145326	1.79833	0.0721242	0.503909	4891	249893	1.02648	ST19_TRAUMAT_SUBDU_HAEMORRHAGE	ST19	Traumatic subdural haemorrhage
-0.0328338	0.0182945	-1.79473	0.0726961	0.487376	2692	343681	0.967699	CD2_BENIGN_MELANOCYTIC_NOS_EXALLC	CD2	Melanocytic naevi, other sites/unspecified
0.0753839	0.0420164	1.79416	0.0727881	0.528272	467	399149	1.0783	AB1_OTHER_MYCOBAC	AB1	Infection due to other mycobacteria
0.0413735	0.0230693	1.79344	0.0729023	0.510865	1669	119468	1.04224	N14_OTHNONINFCERVIX	N14	Other noninflammatory disorders of cervix uteri
0.0682659	0.0380777	1.79281	0.073004	0.52185	570	453163	1.07065	OPER_SGC	DENTAL	Other interventions on the root canals of the tooth
0.0428478	0.0239312	1.79046	0.0733801	0.514543	1500	450101	1.04378	K11_OTHPERITON	K11	Other diseases of peritoneum
0.0316967	0.0177163	1.78912	0.0735953	0.509059	2900	426283	1.0322	R18_ABNORMAL_RESULTS_FUNCTION_STUDI	R18	Abnormal results of function studies
0.0576939	0.0322537	1.78875	0.0736551	0.51617	816	322314	1.05939	M13_SPONDYLOPATHYNAS	M13	Other specified/unspecified spondylopathies
0.0946877	0.0529361	1.78872	0.0736601	0.53997	273	443932	1.09932	E4_THYTOXNOD	E4	Thyrotoxicosis with toxic single thyroid nodule
0.0454495	0.0254114	1.78855	0.0736875	0.51399	1380	452353	1.0465	ST19_ALIQU_COMPLICATI_PRAECO_TRAUMAT	ST19	!Aliquae complicationes praecoces traumatis
0.0454495	0.0254114	1.78855	0.0736875	0.51399	1380	452353	1.0465	ST19_EARLY_COMPLICATIO_TRAUMA	ST19	Early complications of trauma
0.00782546	0.00439733	1.77959	0.0751424	0.501424	60873	392860	1.00786	I9_DISVEINLYMPH	I9	Diseases of veins, lymphatic vessels and lymph nodes, not elsewhere classified
-0.0860299	0.0483466	-1.77944	0.0751675	0.467235	352	244020	0.917567	O15_VENOUS_COMPLIC	O15	Venous complications and haemorrhoids in the puerperium
0.0139195	0.00782415	1.77904	0.0752332	0.501044	16143	322314	1.01402	M13_CERVICDISC	M13	Cervical disc disorders
0.0435952	0.0245089	1.77875	0.075281	0.507221	1483	387841	1.04456	K11_FEMHER	K11	Femoral hernia
0.0874279	0.049155	1.77862	0.0753029	0.521176	337	437420	1.09136	L12_PAPULOSQUAOTH	L12	Other papulosquamous disorders
0.106699	0.0599918	1.77855	0.0753128	0.53376	221	360393	1.1126	K11_IMPACT	K11	Impaction of intestines
0.194713	0.109483	1.77848	0.0753253	0.564704	61	434885	1.21496	ST19_INJURY_HEART	ST19	Injury of heart
0.0528476	0.0297192	1.77823	0.0753664	0.512322	972	192896	1.05427	E4_TESTICHYPO	E4	Testicular hypofunction
0.096202	0.0541004	1.77821	0.0753686	0.532715	273	201494	1.10098	C3_OVARY_ENDOMETROID_EXALLC	C3	Endometroid carcinoma of ovary
0.012451	0.00700658	1.77705	0.07556	0.504165	21792	403817	1.01253	F5_ANXIETY	F5	Other anxiety disorders
-0.124074	0.0700103	-1.77222	0.0763577	0.446031	170	432207	0.883315	VD_SO	NEURO	Vascular dementia (sudden onset)
-0.0680973	0.0384325	-1.77187	0.0764164	0.476512	602	453131	0.93417	CD2_INSITU_SKIN_SCALPNECK	CD2	Carcinoma in situ of skin of scalp and neck
-0.0309355	0.0174606	-1.77173	0.0764387	0.488129	3009	450724	0.969538	C3_KIDNEY_NOTRENALPELVIS	C3	Malignant neoplasm of kidney, except renal pelvis
0.151343	0.0854913	1.77027	0.0766821	0.535341	106	249893	1.1634	ST19_TRAUMAT_CEREBRAL_OEDEMA	ST19	Traumatic cerebral oedema
0.0157987	0.00892632	1.7699	0.0767444	0.503361	12397	441336	1.01592	I9_PULMHEART	I9	Pulmonary heart disease, diseases of pulmonary circulation
0.0218456	0.0123622	1.76713	0.0772061	0.50652	6205	341533	1.02209	CD2_BENIGN_OTHERDIGESTIVE_EXALLC	CD2	Benign neoplasm of other and ill-defined parts of digestive system
0.0219185	0.0124228	1.76438	0.0776687	0.503778	6100	447633	1.02216	CD2_BENIGN_SIGMOID_COLON	CD2	Benign neoplasm: Sigmoid colon
0.0810584	0.0460699	1.75946	0.0784988	0.522071	378	447467	1.08443	J10_PULMEOS	J10	Pulmonary eosinophilia, not elsewhere classified
0.0481632	0.0273884	1.75853	0.0786576	0.513065	1132	392860	1.04934	I9_LYMPHOTH	I9	Other noninfective disorders of lymphatic vessels and lymph nodes
0.0396119	0.0225445	1.75706	0.0789083	0.510548	1714	326530	1.04041	M13_DISSYNOTENDNAS	M13	Other specified/unspecified disorders of synovium and tendon +Other specified/unspecified bursopathies
0.0246548	0.0140335	1.75686	0.0789425	0.504716	4732	392860	1.02496	I9_THROMBOTH	I9	Other embolism and thrombosis
0.143084	0.081449	1.75674	0.0789629	0.544632	115	453618	1.15383	N14_HENOCHSCHONLEIN_NEPHRITIS	N14	Henoch-Sch√∂nlein purpura nephritis¬†(HSPN)
0.0232706	0.0132488	1.75643	0.0790144	0.505867	5468	435242	1.02354	J10_PLEUREFFUSION	J10	Pleural effusion
0.164246	0.0935617	1.75548	0.0791766	0.564018	83	397865	1.1785	H8_EARNAS	H8	Other specified/unspecified disorders of ear
0.026861	0.0153088	1.75461	0.0793258	0.506853	3983	449750	1.02723	VWXY20_PEDAL_CYCLIST_INJURED_NONCOL_TRANSPO_ACCIDENTS	VWXY20	Pedal cyclist injured in noncollision transport accidents
-0.0174617	0.00995376	-1.75428	0.079383	0.495192	9759	432380	0.98269	K11_KELAIBD	K11	IBD patients in KELA-register
0.0772686	0.0440839	1.75276	0.0796428	0.521713	434	451906	1.08033	ST19_BURN_CORROSION_ANKLE_FOOT	ST19	Burn and corrosion of ankle and foot
0.0178609	0.0101931	1.75225	0.0797312	0.501317	9294	444439	1.01802	VWXY20_SEQUEL_EXTER_CAUSES_MORBIDI_MORTA	VWXY20	Sequelae of external causes of morbidity and mortality
-0.0368248	0.0210352	-1.75063	0.0800097	0.485635	1944	432955	0.963845	H7_PRESBYOPIA	H7	Presbyopia
0.0647232	0.0369717	1.75062	0.0800118	0.518534	602	345118	1.06686	C3_TONSIL_BASETONGUE	C3	Malignant cancer of tonsil and base of tongue
-0.0864069	0.0493948	-1.74931	0.0802376	0.472561	367	345062	0.917221	CD2_INSITU_SKIN_EAR_EXALLC	CD2	Carcinoma in situ of skin of ear and external auricular canal
0.0858802	0.0491178	1.74845	0.0803858	0.518337	358	384436	1.08968	Z21_DEPENDENCE_ENABL_MACHINES_DEVICES_NOT_ELSEW_CLASSIFIED	Z21	Dependence on enabling machines and devices, not elsewhere classified
0.0405654	0.0232026	1.74831	0.0804104	0.512382	1728	452005	1.0414	K11_OPEN_BITE	K11	Open bite
0.134236	0.0768337	1.7471	0.0806197	0.554489	143	441640	1.14366	Z21_OTHER_PROBL_RELATED_UPBRI	Z21	Other problems related to upbringing
0.22184	0.127004	1.74672	0.0806861	0.563482	53	453680	1.24837	VWXY20_INTENTI_SELF_H_JUMPI_LYING_MOVING_OBJECT	VWXY20	Intentional self-harm by jumping or lying before moving object
0.034245	0.0196058	1.74667	0.0806941	0.510432	2419	342690	1.03484	I9_LBBB	I9	Left bundle-branch block
-0.0228014	0.0130589	-1.74604	0.0808043	0.496513	5688	187290	0.977457	CD2_LEIOMYOMA_ENDOMETRIOSIS_EXALLC	N14	Benign leiomyoma with endometriosis
0.0941958	0.0540013	1.74432	0.0811026	0.520311	278	397685	1.09877	R18_SYMPTOMS_SIGNS_INVOLVI_APPEA_BEHVI	R18	Symptoms and signs involving appearance and behaviour
0.0384037	0.0220196	1.74407	0.0811474	0.510759	1845	432686	1.03915	L12_NAIL_INGROW	L12	Ingrowing nail
0.0516337	0.0296089	1.74386	0.0811841	0.509401	1032	288472	1.05299	K11_GINGIV_HYPERPLAS	K11	Gingival hyperplasia
0.0966802	0.0554539	1.74343	0.081258	0.539892	273	326530	1.10151	M13_TRANSSYNOVITIS	M13	Transient synovitis
0.0481761	0.0276537	1.74213	0.0814865	0.510678	1174	445700	1.04936	M13_JUVOSTEOCHONRHIP	M13	Juvenile osteochondrosis
0.0349509	0.02008	1.74058	0.0817567	0.503845	2331	412105	1.03557	I9_CEREBDOTH	I9	Other specified cerebrovascular diseases, other cerebrovascular disorders in diseases classified elsewhere
0.0994662	0.0571899	1.73923	0.0819946	0.539034	239	453494	1.10458	C3_PAROTIDGLAND	C3	Malignant neoplasm of parotid gland
-0.018799	0.0108144	-1.73833	0.0821522	0.497396	8641	345118	0.981377	C3_RESPIRATORY_INTRATHORACIC_EXALLC	C3	Malignant neoplasm of respiratory system and intrathoracic organs
0.066555	0.0383022	1.73763	0.0822762	0.514033	587	429396	1.06882	H7_VASCCILIARY	H7	Hyphaema and other vascular disorders of iris and ciliary body
0.0400153	0.023031	1.73746	0.0823065	0.511167	1654	452079	1.04083	Z21_TOBAC_USE	ASTHMA	Tobacco use
0.078213	0.0450643	1.73559	0.0826372	0.517421	422	449536	1.08135	ST19_TOXIC_EFFECT_OTHER_UNSPE_SUBST	ST19	Toxic effect of other and unspecified substances
0.0428198	0.0246939	1.73402	0.0829137	0.51508	1438	436431	1.04375	Z21_NEED_OTH_PROPHYLACT_MEASU	Z21	Need for other prophylactic measures
-0.0797827	0.0460235	-1.73352	0.0830028	0.468707	378	453355	0.923317	C3_GBM	C3	Brain glioblastoma
0.136981	0.0790847	1.73208	0.0832601	0.543834	119	345118	1.14681	C3_GUM_EXALLC	C3	Malignant neoplasm of gum
0.0309953	0.0178971	1.73186	0.083298	0.515138	2810	450923	1.03148	AB1_OTHER_SPIROCHAETAL	AB1	Other spirochaetal diseases
0.0968132	0.0559068	1.73169	0.0833286	0.526541	270	452285	1.10165	Q17_OTHER_CONGEN_MALFO_INTESTINE	Q17	Other congenital malformations of intestine
0.180425	0.104296	1.72994	0.0836403	0.564646	72	439424	1.19773	M13_KAWASAKI	M13	Mucocutaneous lymph node syndrome [Kawasaki]
0.0374179	0.0216456	1.72866	0.0838705	0.514517	1859	439424	1.03813	M13_HYPERMOBILITY	M13	Hypermobility syndrome
0.0166886	0.00967139	1.72556	0.0844264	0.50265	10552	443181	1.01683	VWXY20_SUICI_OTHER_INTENTI_SELF_H	KRA_PSY	Suicide or other Intentional self-harm
0.0360095	0.0208791	1.72467	0.0845877	0.511246	2049	432380	1.03667	ULCEROTH	GASTRO	Other ulcerative colitis
-0.0983147	0.0570232	-1.72412	0.0846863	0.46188	262	450595	0.906364	Q17_OTHER_CONGEN_MALFO_NOT_ELSEW_CLASSIFIED	Q17	Other congenital malformations, not elsewhere classified
0.0137217	0.00796046	1.72374	0.0847557	0.505062	16717	366465	1.01382	J10_TONSILLITIS	J10	Other and unspecified tonsillitis
0.15055	0.0874678	1.7212	0.0852146	0.557339	97	451899	1.16247	L12_PEMPHIGUS_NAS	L12	Other and unspecified pemphigus
-0.0988117	0.0574482	-1.72002	0.0854297	0.450245	262	452317	0.905913	F5_KELARET	F5	Kela-code for behavioural disturbances in mental retardation
0.100173	0.0582549	1.71956	0.0855122	0.510098	230	412885	1.10536	H7_EYELIDFUNC	H7	Other disorders affecting eyelid function
0.0409875	0.0238646	1.7175	0.085888	0.512369	1568	200533	1.04184	O15_POLYHYDR	O15	Polyhydramnios
0.0122309	0.00712829	1.71582	0.0861947	0.501927	21027	432706	1.01231	RX_GLUCOSAMINE	RX	Glucosamine medication
0.0580669	0.0338495	1.71544	0.0862642	0.515696	744	394476	1.05979	L12_PRURIGONOD	L12	Prurigo nodularis
0.0904456	0.0527343	1.71512	0.0863235	0.528215	277	412885	1.09466	H7_XANTHELASMA	H7	Xanthelasma of eyelid
-0.140536	0.0819619	-1.71465	0.0864092	0.448992	110	345118	0.868892	C3_RECTUM_NEUROENDOCRINE_EXALLC	C3	Neuroendocrine tumor and carcinoma of rectum
0.086953	0.0507179	1.71444	0.0864475	0.524551	326	249893	1.09085	ST19_EPIDU_HAEMORRHAGE	ST19	Epidural haemorrhage
0.0177578	0.0103606	1.71397	0.0865344	0.505618	11012	165601	1.01792	Z21_POSTPA_CARE_EXAMI	Z21	Postpartum care and examination
-0.087077	0.050832	-1.71303	0.0867063	0.467604	326	254292	0.916607	N14_CERVICAL_DYSPLASIA_NOS	N14	Dysplastic lesion of unknown severity of the cervix uteri
0.0484898	0.0283308	1.71156	0.0869782	0.51055	1066	452667	1.04968	C3_ORALCAVITY	C3	Malignant neoplasm of oral cavity
0.147695	0.086333	1.71076	0.0871259	0.535358	101	453632	1.15916	MACULA_NAS_ADVERSE	H7	Degenerative macular diseases, drug-induced
0.0618771	0.0361706	1.7107	0.0871363	0.519501	627	326530	1.06383	M13_BURSITISHIPOTH	M13	Other bursitis of hip
0.0244764	0.0143244	1.70872	0.0875033	0.505067	4599	413784	1.02478	MACULAR_PUCKER	H7	Macular pucker
0.0362807	0.0212352	1.70851	0.0875409	0.505128	2091	451642	1.03695	R18_ILL_D_UNKNO_CAUSES_MORTA	R18	Ill-defined and unknown causes of mortality
0.046205	0.0270663	1.7071	0.087803	0.510103	1175	438369	1.04729	L12_OTHACUSKINSUN	L12	Other acute skin changes due to ultraviolet radiation
0.0192243	0.0112654	1.70649	0.0879164	0.507194	7631	246987	1.01941	N14_FEMALE_GENITAL_HSIL	N14	HSIL lesion of the cervix uteri, vagina or vulva
0.0631906	0.0370557	1.70529	0.088141	0.517334	616	434925	1.06523	R18_OTHER_ABNORMAL_IMMUNOL_FINDI_SERUM	R18	Other abnormal immunological findings in serum
0.0540433	0.0317028	1.70468	0.0882533	0.516576	861	423041	1.05553	L12_EPIDERMTHICKNAS	L12	Other and unspecified epidermal thickening
0.0917556	0.0538409	1.7042	0.0883439	0.524811	274	432380	1.0961	COLITENTER	GASTRO	Pseudomembranous colitis
0.0285761	0.0167729	1.7037	0.0884362	0.506564	3288	426987	1.02899	L12_INFECT_SKIN_NAS	L12	Other and unspecified local infections of skin and subcutaneous tissue
-0.0346619	0.0203451	-1.70369	0.0884386	0.487732	2158	432380	0.965932	ULCERPROCT	GASTRO	Ulcerative proctitis
0.0678254	0.0398293	1.7029	0.0885862	0.507021	570	432207	1.07018	VD_MI	NEURO	Vascular dementia (multiple infarctions)
0.0464145	0.0272756	1.70169	0.0888139	0.51813	1127	452606	1.04751	DENTAL_TMD	DENTAL	TMD related pain
0.0239031	0.0140478	1.70155	0.0888392	0.507736	4616	449117	1.02419	CD2_BENIGN_LIPO_SKIN_TRUNK	CD2	Benign lipomatous neoplasm of skin and subcutaneous tissue of trunk
-0.0607679	0.0357176	-1.70134	0.0888784	0.477138	658	345118	0.941042	C3_SMALL_INTESTINE_EXALLC	C3	Malignant neoplasm of small intestine
0.097355	0.0572288	1.70115	0.0889142	0.542054	240	254378	1.10225	CD2_INSITU_CERVIX_UTERI_EXOCERVIX	CD2	Carcinoma in situ of cervix uteri, exocervix
0.0285164	0.0167681	1.70063	0.0890123	0.510129	3334	251284	1.02893	CD2_INSITU_CERVIX_UTERI	CD2	Carcinoma in situ of cervix uteri
0.0495563	0.0291573	1.69962	0.0892025	0.512076	1005	395832	1.0508	G6_MONOOTHUNS	G6	Other and unspecified mononeuropathies, also in other diseases
0.0215109	0.0126748	1.69713	0.0896712	0.504768	6092	378292	1.02174	INFLUENZA	ASTHMA	All influenza (not pneumonia)
0.0295201	0.0174	1.69656	0.0897796	0.506915	3009	450724	1.02996	CD2_BENIGN_TRANSVERSE_COLON	CD2	Benign neoplasm: Transverse colon
0.0422905	0.0249336	1.69612	0.0898625	0.510978	1391	452342	1.0432	CD2_BENIGN_MELANOCYTIC_LOWERLIMB	CD2	Melanocytic naevi of lower limb, including hip
0.0694937	0.0410342	1.69355	0.0903499	0.52456	494	446531	1.07197	D3_HAEMORRHAGICNAS	D3	Other and unspecified haemorrhagic conditions
0.019511	0.0115294	1.69228	0.0905925	0.505511	7371	441039	1.0197	AB1_VIRAL_NOS	AB1	Other viral diseases, not elsewhere classified
0.0426094	0.0252365	1.6884	0.0913339	0.508793	1400	452333	1.04353	R18_ABNORMAL_FINDI_EXAMI_URINE_WO_DIAGNOSIS	R18	Abnormal findings on examination of urine, without diagnosis
0.0109876	0.0065127	1.6871	0.0915846	0.502141	24647	420692	1.01105	ST19_FRACT_FOREA	ST19	Fracture of forearm
0.0383382	0.0227258	1.68699	0.0916056	0.505417	1729	444439	1.03908	VWXY20_SEQUEL_OTHER_EXTER_CAUSES	VWXY20	Sequelae of other external causes
-0.0318264	0.0188711	-1.68652	0.091696	0.490662	2677	201494	0.968675	C3_CORPUS_UTERI_EXALLC	C3	Malignant neoplasm of corpus uteri
0.0314671	0.0186771	1.6848	0.0920272	0.505712	2729	439144	1.03197	F5_DELUSIO	F5	Persistent delusional disorders
-0.195905	0.116462	-1.68213	0.092544	0.405892	58	453675	0.822091	VWXY20_INTENTI_SELF_H_DROWN_SUBME	VWXY20	Intentional self-harm by drowning and submersion
-0.0465128	0.0276549	-1.6819	0.0925877	0.484693	1139	452594	0.954552	CD2_INSITU_MELANOMA	CD2	Melanoma in situ
0.0782993	0.0465559	1.68184	0.0926007	0.528669	376	451530	1.08145	HEPATITIS_ACUTE_OTHER_VIRAL	AB1	Other acute viral hepatitis
0.0200785	0.0119402	1.68159	0.0926483	0.501818	6651	322314	1.02028	M13_RADICULOPATHY	M13	Radiculopathy
0.123207	0.0733598	1.67948	0.0930576	0.539333	160	432207	1.13112	VD_O	NEURO	Vascular dementia (other)
0.0249295	0.0148575	1.67791	0.0933644	0.508595	4177	412885	1.02524	H7_CHALAZION	H7	Chalazion
0.0151209	0.00902196	1.67601	0.0937369	0.502864	12339	360393	1.01524	K11_OTHANRECT	K11	Other diseases of anus and rectum
0.0887265	0.0529572	1.67544	0.093848	0.523401	285	412105	1.09278	I9_THROMBICV	I9	Nonpyogenic thrombosis of intracranial venous system
0.0372714	0.0222552	1.67473	0.0939874	0.509699	1789	445490	1.03797	D3_OTHERWHITECELL	D3	Other disorders of white blood cells
0.0273543	0.0163428	1.67379	0.0941719	0.503909	3625	387841	1.02773	HERING_BILATERAL	K11	Inguinal hernia, bilateral
0.041038	0.0245293	1.67302	0.0943237	0.513884	1476	452257	1.04189	K11_APHTA_RECUR	K11	Recurring oral aphthae
0.0404308	0.0241683	1.67288	0.0943508	0.513798	1480	432380	1.04126	ULCERILEO	GASTRO	Ulcerative ileocolitis
0.0895993	0.0535939	1.67182	0.0945602	0.533041	285	384436	1.09374	Z21_ACQUI_ABSENCE_LIMB	Z21	Acquired absence of limb
-0.0586089	0.0350814	-1.67066	0.0947895	0.480656	695	450415	0.943075	H7_PAPILLOEDEMA	H7	Papilloedema, unspecified
0.0306665	0.0183577	1.6705	0.0948205	0.514882	2659	451074	1.03114	AB1_LYME	AB1	Lyme disease
0.0717278	0.0429898	1.66848	0.0952197	0.521799	434	345118	1.07436	C3_TONSIL_EXALLC	C3	Malignant neoplasm of tonsil
0.0104646	0.00627423	1.66787	0.0953422	0.503278	26081	427652	1.01052	R18_ABNORMAL_FINDI_EXAMI_OTHER_BODY_FLUIDS_SUBST_TISSU_WO_DIAGNOSIS	R18	Abnormal findings on examination of other body fluids, substances and tissues, without diagnosis
0.0952426	0.0571569	1.66634	0.0956467	0.540176	240	201306	1.09993	CD2_INSITU_CERVIX_UTERI_EXOCERVIX_EXALLC	CD2	Carcinoma in situ of cervix uteri, exocervix
-0.0471343	0.0283022	-1.66539	0.0958342	0.483524	1080	384436	0.953959	Z21_PERSONAL_HISTORY_MALIG_NEOPLASM	Z21	Personal history of malignant neoplasm
0.0954992	0.0574058	1.66358	0.0961963	0.532578	247	432149	1.10021	H7_SEVVISIMPMONOC	H7	Severe visual impairment, monocular
0.0689903	0.0414824	1.66312	0.0962886	0.514128	497	366465	1.07143	J10_EPIGLOTTITIS	J10	Acute epiglottitis
0.010678	0.00642545	1.66183	0.0965472	0.50422	25127	413573	1.01074	H7_USEOFEYEANTIALLERGENS	H7	Use of eye-antiallergens (taken as indicator of allergic/atopic conjunctivitis)
0.0349603	0.0210851	1.65806	0.097306	0.501232	2155	365880	1.03558	Z21_PROBL_RELATED_MEDICAL_FACILITI_OTH_HEALTH_CARE	Z21	Problems related to medical facilities and other health care
0.19106	0.115311	1.65691	0.0975374	0.54756	51	438050	1.21053	L12_ERYTH_ANNULCENTRIFUG	L12	Erythema annulare centrifugum
0.170348	0.103063	1.65286	0.09836	0.557617	67	432955	1.18572	H7_STRABMECH	H7	Mechanical strabismus
0.0877037	0.0530682	1.65266	0.0984	0.517091	292	453192	1.09166	Q17_CONGEN_MALFO_TRACHEA_BRONCHUS	Q17	Congenital malformations of trachea and bronchus
-0.100913	0.0610836	-1.65205	0.0985245	0.461975	207	201484	0.904012	CD2_INSITU_BREAST_LOBULAR_EXALLC	CD2	Carcinoma in situ of breast, lobular
0.0210193	0.0127391	1.64998	0.0989469	0.50771	6139	366465	1.02124	J10_PHARYNGITIS	J10	Acute pharyngitis
0.0644727	0.0391573	1.64651	0.0996595	0.513092	548	341375	1.0666	RHEUMA_CHRYSTAL	RHEUMA	Crystal arthropathies, rheuma endpoint
0.0497193	0.0302065	1.64598	0.0997675	0.513491	932	429826	1.05098	M13_BONEDISNAS	M13	Other specified/unspecified disorders of bone/cartilage
0.0496323	0.0301705	1.64506	0.0999572	0.513191	920	395832	1.05088	G6_FACOTH	G6	Other facial nerve disorders
0.139546	0.0849046	1.64356	0.100267	0.531787	109	166614	1.14975	ABPA	ASTHMA	Allergic bronchopulmonary aspergillosis (ABPA)
0.110067	0.066978	1.64333	0.100314	0.532976	175	432686	1.11635	L12_RHINOPHYMA	L12	Rhinophyma
0.0239497	0.0145808	1.64255	0.100477	0.50849	4504	420112	1.02424	ST19_SUPERF_INJURY_ANKLE_FOOT	ST19	Superficial injury of ankle and foot
-0.0780554	0.0475797	-1.64052	0.100897	0.473967	359	453374	0.924913	CD2_INSITU_MELANOMA_TRUNK	CD2	Melanoma in situ of trunk
0.0167621	0.0102191	1.64028	0.100947	0.504535	9085	326530	1.0169	M13_GANGLION	M13	Ganglion
-0.0308486	0.0188143	-1.63964	0.10108	0.490342	2476	385630	0.969622	E4_GOITRENOD	E4	Nontoxic single thyroid nodule
0.0978025	0.0597244	1.63756	0.101513	0.522177	215	453518	1.10274	LUNG_TRANSPLANTATION	ILD	Lung transplantation
0.018348	0.0112053	1.63744	0.101539	0.504164	7399	384681	1.01852	SGLT2INH	RX	Sodium-glucose co-transporter 2 (SGLT2) inhibitors
0.0349184	0.0213429	1.63606	0.101826	0.509168	1958	451775	1.03554	CD2_BENIGN_DESCENDING_COLON	CD2	Benign neoplasm: Descending colon
0.0902515	0.0552229	1.63431	0.102193	0.521919	258	453475	1.09445	CD2_BENIGN_NASOPHARYNX	CD2	Benign neoplasm: Nasopharynx
0.0566773	0.0347494	1.63103	0.102884	0.513873	707	384093	1.05831	E4_HYPERGLYCER	E4	Pure hyperglyceridaemia
0.144332	0.0885148	1.6306	0.102974	0.542136	90	440301	1.15527	K11_LIVDISINOTH	K11	Liver disorders in diseases classified elsewhere
0.0572768	0.0351365	1.63013	0.103075	0.515718	803	432380	1.05895	COLITALLERG	GASTRO	Allergic colitis
0.0144899	0.00889591	1.62883	0.103349	0.502728	12692	441041	1.0146	F5_PERSOBEH	F5	Disorders of adult personality and behaviour
-0.0861424	0.0529028	-1.62832	0.103458	0.472181	291	200533	0.917464	O15_PLAC_DISORD	O15	Placental disorders
-0.0185409	0.0113875	-1.62818	0.103486	0.493861	7314	446419	0.98163	K11_KELAUC	K11	UC patients in KELA-register ( KELA 208 prior to 1994, or ICD K51)
0.0973849	0.0598522	1.62709	0.103718	0.521808	214	453518	1.10228	Z21_LUNG_TRANSPLANT_STATUS	Z21	Lung transplant status
-0.0134098	0.00824826	-1.62577	0.103998	0.495924	15222	354844	0.98668	Z21_PROCREATIVE_MANAG	Z21	Procreative management
-0.0809371	0.0498884	-1.62236	0.104726	0.467195	322	344887	0.922252	CD2_BENIGN_BONE_SCAPULA_LONG_UPPER_EXALLC	CD2	Benign neoplasm: Scapula and long bones of upper limb
0.152601	0.0942807	1.61858	0.105538	0.558322	83	432686	1.16486	L12_ACNE_VARIOLIFORMIS	L12	Acne varioliformis
0.074615	0.0461061	1.61833	0.10559	0.512794	391	453163	1.07747	AB1_TULARAEMIA	AB1	Tularaemia
0.0724786	0.0447864	1.61832	0.105594	0.521172	403	412885	1.07517	H7_EYELIDNAS	H7	Other specified and unspecified disorders of eyelid
0.0989407	0.0611819	1.61716	0.105844	0.529447	226	442447	1.104	ST19_EFFEC_HEAT_LIGHT	ST19	Effects of heat and light
0.0258838	0.0160107	1.61666	0.105952	0.505035	3446	395832	1.02622	G6_BRACHPLE	G6	Brachial plexus disorders
0.0326296	0.0201861	1.61644	0.105999	0.509164	2311	432149	1.03317	H7_BLINDANDVISIMPAIRMENT	H7	Visual impairment including blindness (binocular or monocular)
-0.0389049	0.0240768	-1.61587	0.106123	0.484361	1515	452218	0.961842	OPER_JFB31	GASTRO	Laparoscopic right hemicolectomy
-0.132389	0.0819513	-1.61546	0.106211	0.451228	110	453623	0.876	C3_RECTUM_NEUROENDOCRINE	C3	Neuroendocrine tumor and carcinoma of rectum
0.0840414	0.0520477	1.6147	0.106376	0.52853	305	432380	1.08767	COLITRAD	GASTRO	Colitis due to radiation
0.0631649	0.0391959	1.61152	0.107067	0.513257	548	287796	1.0652	M13_CRYSTALARTH	M13	Other crystal arthropathies
0.123322	0.0765299	1.61142	0.107089	0.537161	157	452972	1.13125	P16_BIRTH_ASPHYXIA	P16	Birth asphyxia
0.10257	0.063658	1.61126	0.107122	0.540923	201	198914	1.10801	CD2_BENIGN_PROSTATE	CD2	Benign neoplasm: Prostate
0.161226	0.10007	1.61112	0.107154	0.55987	73	453660	1.17495	CD2_BENIGN_PINEAL	CD2	Benign neoplasm: Pineal gland
0.0125057	0.00776382	1.61076	0.107232	0.505639	17285	365880	1.01258	Z21_PERSONS_ENCOUNTERI_HEALTH_SERVI_OTH_CIRCUMSTANC2	Z21	Persons encountering health services in other circumstances
0.0285796	0.0177484	1.61027	0.107339	0.507229	2928	440754	1.02899	R18_SPEECH_DISTU_NOT_ELSEW_CLASSIFIED	R18	Speech disturbances, not elsewhere classified
0.161182	0.100113	1.61	0.107398	0.557664	73	345062	1.1749	CD2_BENIGN_PINEAL_EXALLC	CD2	Benign neoplasm: Pineal gland
0.0408689	0.0254152	1.60805	0.107825	0.510967	1358	253260	1.04172	N14_VULVAL_DYSPLASIA_ALL	N14	All dysplastic lesions of the vulva
0.0694499	0.0432051	1.60745	0.107956	0.521698	446	432686	1.07192	L12_ACNE_NAS	L12	Other and unspecified acne
-0.0485604	0.0302384	-1.60592	0.108292	0.483942	956	345118	0.9526	C3_STOMACH_ADENO_EXALLC	C3	Adenocarcinoma and papillary adenocarcinoma of stomach
0.00880481	0.0054831	1.60581	0.108316	0.503068	45284	119468	1.00884	N14_MESNRUIRREG	N14	Excessive, frequent and irregular menstruation
0.0585624	0.0364725	1.60566	0.108349	0.518323	638	451138	1.06031	AB1_VIRAL_ENCEPHALITIS_NOS	AB1	Viral encephalitis, not elsewhere classified/unspecified
0.069258	0.0432117	1.60276	0.108987	0.516414	433	452938	1.07171	AB1_PNEUMOCYSTOSIS	AB1	Pneumocystosis
-0.162641	0.101549	-1.6016	0.109244	0.414729	71	453662	0.849896	VWXY20_EXPOS_UNCONT_FIRE_NOT_BUILD_STRUCTURE	VWXY20	Exposure to uncontrolled fire, not in building or structure
0.0269624	0.0168371	1.60136	0.109296	0.504161	3232	412885	1.02733	H7_STENOLACRI	H7	Stenosis and insufficiency of lacrimal passages
0.0162742	0.0101666	1.60075	0.109433	0.50152	9185	322314	1.01641	M13_CERVICOBRACHSDR	M13	Cervicobrachial syndrome
0.0258574	0.0161768	1.59843	0.109948	0.503291	3700	387841	1.02619	FEMINGHER_BILATERAL	K11	Inguinal or femoral hernia, bilateral
0.0293409	0.018416	1.59323	0.111108	0.505279	2892	250671	1.02978	RESPIRATORYINSUFF	ASTHMA	Respiratory insufficiency
-0.0165835	0.0104114	-1.59282	0.111201	0.494241	10242	119468	0.983553	N14_OTHNONINFUTER	N14	Other noninflammatory disorders of uterus, except cervix
0.0404221	0.0253829	1.5925	0.111273	0.509103	1332	423041	1.04125	L12_SCARCONDITIONS	L12	Scar conditions and fibrosis of skin
0.048395	0.0304031	1.59178	0.111435	0.515261	925	326530	1.04959	M13_INFBURSA	M13	Infective bursitis
0.0512675	0.0322412	1.59013	0.111807	0.514664	842	413573	1.0526	H7_PTERYGIUM	H7	Pterygium
-0.0846065	0.0532516	-1.58881	0.112104	0.465223	283	344925	0.918874	CD2_BENIGN_MELANOCYTIC_LIP_EXALLC	CD2	Melanocytic naevi of lip
0.0189396	0.0119289	1.5877	0.112355	0.497917	7936	445797	1.01912	ADMED_MEMANTINE	RX	Use of memantine
0.0189396	0.0119289	1.5877	0.112355	0.497917	7936	445797	1.01912	ADMED_OTHER_ANTI_DEMENTIA_DRUGS	RX	Use of other anti-dementia drugs
-0.127513	0.0803467	-1.58704	0.112504	0.451768	126	453607	0.880282	Q17_AVSD	Q17	Atrioventricular septal defect
0.0289702	0.0182565	1.58684	0.112548	0.509077	2700	448708	1.02939	H7_OCUPAIN	H7	Ocular pain
0.0635082	0.0401	1.58375	0.113252	0.518492	581	453152	1.06557	E4_DISPUB_ALL	E4	Disorders of puberty, all
0.0454523	0.0287113	1.58308	0.113403	0.518292	999	322314	1.0465	M13_SPININSTAB	M13	Spinal instabilities
0.0536392	0.0338937	1.58257	0.113519	0.513123	735	445490	1.0551	D3_SCNDPOLYCYTHAEMIA	D3	Secondary polycythaemia
0.0818609	0.0517341	1.58234	0.113573	0.518001	290	453443	1.0853	CD2_BENIGN_MENINGES_SPINAL	CD2	Benign neoplasm: Spinal meninges
0.145943	0.0924326	1.57892	0.114355	0.544519	83	384093	1.15713	E4_LIPOMATOSIS	E4	Lipomatosis, not elsewhere classified
0.120052	0.0760664	1.57825	0.114509	0.537848	131	453602	1.12756	CD2_BENIGN_CONNSOFT_THX	CD2	Benign neoplasm: Connective and other soft tissue of thorax
0.0120678	0.00764701	1.57811	0.114541	0.50216	17310	322314	1.01214	M13_DORSALGIANAS	M13	Other/unspecified dorsalgia
0.0172403	0.0109277	1.57767	0.114641	0.501661	8304	445429	1.01739	TRAUMBRAIN_NONCONCUS	NEURO	severe traumatic brain injury, does not include concussion
-0.0257096	0.0163044	-1.57685	0.114831	0.497446	3908	182510	0.974618	O15_POSTPART_HAEMORRH_ANATOMY	O15	Postpartum haemorrhage due to anatomy
0.0665799	0.0422384	1.57629	0.114959	0.52018	466	453267	1.06885	CD2_BENIGN_SMALL_INTESTINE_OTH	CD2	Benign neoplasm: Other and unspecified parts of small intestine
0.0867496	0.0551108	1.57409	0.115466	0.529791	266	180063	1.09062	O15_ABORT_OTHER	O15	Other abortion
0.028552	0.0181549	1.57269	0.115792	0.506848	2846	399149	1.02896	AB1_STREPTO_SEPSIS	AB1	Streptococcal septicaemia
0.0411309	0.0261894	1.57051	0.116295	0.502247	1350	322314	1.04199	M13_SPINENTHES	M13	Spinal enthesopathy
0.0241762	0.0153992	1.56997	0.116422	0.504649	3850	449883	1.02447	G6_RLS	G6	Restless leg syndrome
-0.0236861	0.0150885	-1.5698	0.116461	0.490528	4147	449586	0.976592	C3_COLON_ADENO	C3	Colon adenocarcinoma
0.0576691	0.0368295	1.56584	0.117386	0.518086	651	143288	1.05936	CD2_BENIGN_MALE_GEN_EXALLC	CD2	Benign neoplasm of male genital organs
-0.0223798	0.0142934	-1.56574	0.117409	0.493768	4531	194563	0.977869	O15_RETAINED_PLAC_MEMB_NO_HEAMORRH	O15	Retained placenta and membranes, without haemorrhage
0.147659	0.0943782	1.56455	0.117688	0.53842	84	451091	1.15912	G6_HCPOSTRAU	G6	Post-traumatic hydrocephalus, unspecified
0.0221245	0.0141488	1.56369	0.11789	0.505442	4732	432955	1.02237	H7_MYOPIA	H7	Myopia
0.109036	0.0697595	1.56303	0.118045	0.546373	155	434894	1.1152	E4_ADRENAS	E4	Disorders of adrenal gland, other and/or unspecified
0.0478941	0.0306486	1.56268	0.118127	0.508615	911	452822	1.04906	K11_MAJOR_ANOMALI_JAW_SIZE	K11	Major anomalies of jaw size
0.152487	0.097608	1.56224	0.118232	0.533657	92	453192	1.16473	Q17_CONGEN_MALFO_LARYNX	Q17	Congenital malformations of larynx
0.0189484	0.0121437	1.56034	0.118679	0.505869	6450	404657	1.01913	G6_MIGRAINE_NO_AURA_TRIPTAN	G6	Migraine without aura and triptan purchases
-0.0425533	0.0272809	-1.55982	0.118802	0.482855	1196	452537	0.958339	C3_NONHODGKIN	C3	Non-Hodgkin lymphoma, all
0.108539	0.0695919	1.55965	0.118843	0.535029	162	420112	1.11465	ST19_SUPERF_INJURY_ANKLE_FOOT_UNSPE	ST19	Superficial injury of ankle and foot, unspecified
0.0468131	0.0300866	1.55594	0.119721	0.518401	950	378074	1.04793	RX_L01BB02	RX	6-mercaptopurine
0.0252109	0.0162336	1.55301	0.120421	0.505223	3479	412885	1.02553	H7_PTOSIS	H7	Ptosis of eyelid
-0.0949395	0.0612096	-1.55106	0.120888	0.463836	207	254411	0.909428	CD2_INSITU_BREAST_LOBULAR	CD2	Carcinoma in situ of breast, lobular
0.0887378	0.0572154	1.55094	0.120915	0.536819	239	345118	1.09279	C3_PAROTIDGLAND_EXALLC	C3	Malignant neoplasm of parotid gland
0.0383924	0.0247667	1.55016	0.121103	0.511069	1423	452310	1.03914	CD2_BENIGN_URINARY	CD2	Benign neoplasm of urinary organs
0.0203069	0.0131	1.55014	0.121108	0.505804	5473	432380	1.02051	ULCERNAS	GASTRO	Ulcerative colitis, NAS
0.128759	0.0830989	1.54947	0.121269	0.543233	124	434894	1.13742	E4_PUBDISNAS	E4	Disorders of puberty, other/unspecified
0.0428606	0.0276723	1.54886	0.121416	0.507622	1170	420324	1.04379	I9_ARTEMBTHRLOW	I9	Arterial embolism and thrombosis of lower extremity artery
0.119375	0.0771137	1.54804	0.121612	0.539471	132	434925	1.12679	R18_FINDI_DRUGS_OTHER_SUBST_NOT_NORMALLY_FOUND_BLOOD	R18	Findings of drugs and other substances, not normally found in blood
0.017285	0.011179	1.54621	0.122055	0.503069	7601	446132	1.01744	PDMED_PRAMIPEXOLE	RX	Use of pramipexole
-0.0183929	0.0118982	-1.54586	0.122138	0.495576	6893	119468	0.981775	N14_ENDOMETRIOSIS_PELVICPERITONEUM	N14	Endometriosis of pelvic peritoneum
0.160509	0.103897	1.54488	0.122375	0.555477	68	385381	1.17411	ST19_TRAUMAT_AMPUT_LOWER_LEG	ST19	Traumatic amputation of lower leg
0.0701915	0.0454544	1.54422	0.122535	0.518024	396	322314	1.07271	M13_KYPHOSIS	M13	Kyphosis
0.112345	0.0728628	1.54186	0.123106	0.53828	144	424573	1.1189	E4_VIT_A_DEF	E4	Vitamin A deficiency
0.0127887	0.0082947	1.54179	0.123125	0.496157	18216	435517	1.01287	KRA_PSY_DEMENTIA	KRA_PSY	Any dementia
0.0937601	0.0608143	1.54174	0.123136	0.522069	218	452285	1.0983	Q17_OTHER_CONGEN_MALFO_UPPER_ALIME_TRACT	Q17	Other congenital malformations of upper alimentary tract
0.114437	0.0742265	1.54173	0.123139	0.526207	146	432149	1.12124	H7_SEVVISIMPBINOC	H7	Severe visual impairment, binocular
0.147209	0.0955884	1.54003	0.123553	0.552715	77	439424	1.1586	M13_POYARTOTH	M13	Other conditions related to polyarteritis nodosa
0.00949589	0.00617231	1.53847	0.123934	0.501394	27791	425942	1.00954	KRA_PSY_SUBSTANCE	KRA_PSY	Substance abuse
0.075374	0.0490612	1.53633	0.124458	0.516035	346	435305	1.07829	D3_OTHERAPLASTICANAEMIA	D3	Other and unspecified aplastic anaemias
-0.0765102	0.0498686	-1.53424	0.124972	0.469475	322	453411	0.926343	CD2_BENIGN_BONE_SCAPULA_LONG_UPPER	CD2	Benign neoplasm: Scapula and long bones of upper limb
0.159973	0.104312	1.53361	0.125126	0.550853	69	384093	1.17348	E4_LACTOCON	E4	Congenital lactase deficiency
0.0590301	0.0385287	1.53211	0.125496	0.521711	591	241581	1.06081	L12_HIRSUTISM	L12	Hirsutism in women
-0.104258	0.0680959	-1.53104	0.125759	0.464487	170	451875	0.900993	Z21_RIGHT_SIDE	Z21	Right side
0.0735389	0.0480711	1.52979	0.126068	0.522561	342	446969	1.07631	N14_ISOLPROTEINURIA	N14	Isolated proteinuria with specified morphological lesion
0.0144051	0.00941715	1.52967	0.126099	0.502918	11867	238922	1.01451	ALLERG_ASTHMA_EXMORE	ASTHMA	Allergic asthma (mode)
0.0206963	0.0135364	1.52893	0.126282	0.504081	5216	448517	1.02091	ST19_BURNS_CORROSIO	ST19	Burns and corrosions
0.046294	0.0302903	1.52835	0.126427	0.511903	937	437390	1.04738	ST19_DISLO_SPRAIN_STRAIN_JOINTS_LIGAM_LUMBAR_SPINE_PELVIS	ST19	Dislocation, sprain and strain of joints and ligaments of lumbar spine and pelvis
0.0419376	0.027447	1.52795	0.126526	0.50944	1153	431119	1.04283	H8_VESTIFUNCNAS	H8	Other/unspecified disorders of vestibular function
0.0219144	0.0143551	1.52659	0.126863	0.5071	4617	250001	1.02216	O15_POOR_FETGRO	O15	Poor fetal growth
-0.115243	0.0755298	-1.52579	0.127062	0.445898	139	422407	0.89115	H8_MYRINGCHRON	H8	Chronic myringitis
0.0420279	0.0276061	1.52241	0.127906	0.511345	1186	342690	1.04292	I9_RBBB	I9	Right bundle-branch block
0.0416948	0.0274029	1.52155	0.128122	0.509114	1199	382065	1.04258	Z21_ATTN_ARTIF_OPENI	Z21	Attention to artificial openings
0.0178893	0.0117631	1.5208	0.128311	0.506717	7447	103696	1.01805	K11_EROSION_INCLAVO	K11	Erosion of teeth, including avohilmo
0.0563775	0.0370777	1.52052	0.12838	0.516316	614	450415	1.058	H7_OPTNERVNAS	H7	Disorders of optic nerve, not elsewhere classified
0.0926004	0.0609624	1.51898	0.128768	0.528161	200	432686	1.09702	L12_HAIRLOSS_NONSCARNAS	L12	Other and unspecified nonscarring hair loss
0.0489512	0.0323134	1.51489	0.129801	0.504979	865	452868	1.05017	VWXY20_PUTOAM_VUOTE	VWXY20	Fall involving bed
0.0253424	0.0167478	1.51317	0.130236	0.506058	3333	450400	1.02567	ST19_INJURI_UNSPE_PART_TRUNK_LIMB_BODY_REGION	ST19	Injuries to unspecified part of trunk, limb or body region
0.0321408	0.0212603	1.51177	0.130592	0.509232	2533	428311	1.03266	J10_BRONCHIOLITIS	J10	Acute bronchiolitis
0.0396365	0.0262326	1.51097	0.130797	0.50274	1360	217833	1.04043	Z21_EXAM_ENCOUNTER_ADMINISTR_PURPO	Z21	Examination and encounter for administrative purposes
0.0126751	0.00839282	1.51023	0.130984	0.500213	14193	439540	1.01276	G6_XTRAPYR	G6	Extrapyramidal and movement disorders
0.0195974	0.0130032	1.50713	0.131778	0.498118	6741	428053	1.01979	F5_ALZHDEMENT	F5	Dementia in Alzheimer disease
0.0754777	0.0501579	1.5048	0.132375	0.524524	306	453427	1.0784	RX_ASTMA_BIOL	RX	Biological medicines for asthma
-0.086593	0.0575895	-1.50362	0.132678	0.467057	229	345118	0.91705	C3_LUNG_NEUROENDO_EXALLC	C3	Neuroendocrine tumor and carcinoma of lung
0.0374064	0.0248822	1.50334	0.132751	0.510904	1464	345118	1.03811	C3_BILIARY_GALLBLADDER_EXALLC	C3	Malignant neoplasm of intrahepatic ducts, biliary tract and gallbladder
-0.0800165	0.0532547	-1.50252	0.132962	0.467482	283	453450	0.923101	CD2_BENIGN_MELANOCYTIC_LIP	CD2	Melanocytic naevi of lip
0.017637	0.011751	1.5009	0.133382	0.506694	6977	247641	1.01779	N14_CERVICAL_HSIL	N14	HSIL lesion of the cervix uteri
0.0202156	0.0134747	1.50026	0.133547	0.507695	5195	249423	1.02042	N14_FEMALE_GENITAL_LSIL	N14	LSIL lesion of the cervix uteri, vagina or vulva
-0.0198072	0.0132517	-1.49469	0.134995	0.493066	5312	448421	0.980388	CD2_BENIGN_SKIN_EYELID	CD2	Benign neoplasm: Skin of eyelid, including canthus
0.0545798	0.0365331	1.49398	0.13518	0.51307	686	141300	1.0561	N14_TORSIOTEST	N14	Torsion of testis
-0.0302917	0.0203003	-1.49218	0.135651	0.491956	2195	226439	0.970162	N14_INFCERVIX	N14	Inflammatory disease of cervix uteri
0.0106022	0.00710593	1.49202	0.135694	0.500713	20381	433352	1.01066	ALCOHOLMENTAL	ALCO	Mental and behavioural disorders due to alcohol, excluding acute intoxication
0.058178	0.0389946	1.49195	0.135712	0.513084	585	453148	1.0599	E4_MALNUTRITION	E4	Malnutrition
0.0151887	0.0101813	1.49183	0.135745	0.505521	9136	322314	1.0153	M13_ENTESOPATHYLOW	M13	Enthesopathies of lower limb, excluding foot
-0.00948281	0.00635713	-1.49168	0.135783	0.498353	42795	165601	0.990562	Z21_SUPERV_NORMAL_PREGNAC1	Z21	Supervision of normal pregnancy
0.0954761	0.0640759	1.49005	0.136212	0.519552	188	448864	1.10018	FIBROLIV	GASTRO	Fibrosis of liver
0.0201984	0.0135606	1.48949	0.136357	0.507793	5146	440626	1.0204	U22_COVID19_SUSPECTED	U22	Covid-19 suspected case
-0.0567242	0.0380999	-1.48883	0.136533	0.479376	591	453142	0.944855	CD2_INSITU_SKIN_UPPERLIMB	CD2	Carcinoma in situ of skin of upper limb, including shoulder
0.138373	0.0930546	1.48701	0.137011	0.534696	101	453632	1.1484	EPILEPTIC_SEIZU_RELATED_DRUGS	G6	Epileptic seizures related to drugs
0.0820865	0.0552273	1.48634	0.13719	0.519695	258	344959	1.08555	CD2_BENIGN_NASOPHARYNX_EXALLC	CD2	Benign neoplasm: Nasopharynx
0.0762174	0.0512788	1.48633	0.137191	0.510559	353	333607	1.0792	R18_SENILITY	R18	Senility
0.0637367	0.0428993	1.48573	0.137351	0.517751	480	250671	1.06581	ESOSINOPHIL_DISEASE	D3	Eosinophilic disease (BM)
0.0249134	0.0167787	1.48482	0.137591	0.508299	3334	198767	1.02523	CD2_INSITU_CERVIX_UTERI_EXALLC	CD2	Carcinoma in situ of cervix uteri
-0.0703889	0.0474086	-1.48473	0.137616	0.470952	360	322314	0.932031	M13_SPONDYLOPATHINOTH	M13	Spondylopathies in diseases classified elsewhere
0.0517205	0.0348409	1.48448	0.137682	0.511283	702	433110	1.05308	COPD_OPPORTUNIST_INFECTIONS	COPD	COPD related to chronic (opportunist) infections
0.0228997	0.0154267	1.48442	0.137697	0.506689	3823	445490	1.02316	D3_AGRANULOCYTOSIS	D3	Agranulocytosis
0.112869	0.0760393	1.48435	0.137717	0.535674	131	345040	1.11948	CD2_BENIGN_CONNSOFT_THX_EXALLC	CD2	Benign neoplasm: Connective and other soft tissue of thorax
0.0558922	0.0376827	1.48323	0.138013	0.513748	609	453124	1.05748	C3_HEPATOCELLU_CARC	C3	Hepatocellular carcinoma
0.0802415	0.0541004	1.4832	0.138022	0.522189	287	453446	1.08355	VWXY20_INHAL_INGESTI_FOOD_CAUSI_OBSTRUCTION_RESPI_TRACT	VWXY20	Inhalation and ingestion of food causing obstruction of respiratory tract
0.0570521	0.0384746	1.48285	0.138114	0.510052	643	199772	1.05871	PD_DEMENTIA_EXMORE	NEURO	Dementia due to Parkinson's disease
0.107774	0.0727103	1.48224	0.138276	0.533387	148	342690	1.1138	I9_CARDMYOINOTH	I9	Cardiomyopathy in other diseases
0.086337	0.0583027	1.48084	0.138649	0.523997	230	288472	1.09017	K11_TEETH_HARD_NOS	K11	Disease of hard tissues of teeth, NOS
0.0109367	0.00739131	1.47967	0.138961	0.500591	18695	435038	1.011	AUD	F5	Alcohol use disorder, ICD-based
0.0521451	0.0353161	1.47652	0.139804	0.515385	671	413573	1.05353	H7_CONJUNCTDEGDEPOT	H7	conjunctival degenerations and deposits
0.0391663	0.0265354	1.476	0.139943	0.507999	1232	434113	1.03994	H7_VITROPACIT	H7	Other vitreous opacities
-0.058709	0.0397874	-1.47557	0.14006	0.482627	538	450415	0.942981	H7_OPTATROPHY	H7	Optic atrophy
0.0484395	0.0328445	1.47481	0.140263	0.511968	786	445865	1.04963	SFN	NEURO	Small fibre neuropathy
0.128369	0.0870794	1.47416	0.140438	0.502688	106	453171	1.13697	AB1_OTHER_CESTODE	AB1	Other cestode infections
0.150629	0.102327	1.47204	0.14101	0.547441	66	453198	1.16257	AB1_HIV_INFECT_PARASITES	AB1	Human immunodeficiency virus [HIV] disease resulting in infectious and parasitic diseases
0.0766414	0.0520852	1.47146	0.141166	0.527022	294	451899	1.07965	L12_OTHERBULL	L12	Other and unspecified bullous disorders
0.0346711	0.0236136	1.46827	0.142031	0.50732	1558	200533	1.03528	O15_MATERN_CARE_DISPROP	O15	Maternal care for known or suspected disproportion
0.0333333	0.0227042	1.46816	0.142061	0.503198	1744	403817	1.0339	F5_NEUROTICOTH	F5	Other neurotic disorders
-0.039786	0.0271329	-1.46634	0.142556	0.493344	1301	200728	0.960995	CD2_BENIGN_UTERUS_NOS_EXALLC	CD2	Other benign neoplasm of uterus: Other parts/unspecified
-0.0445797	0.0304061	-1.46614	0.14261	0.478078	956	452777	0.956399	CD2_INSITU_BLADDER	CD2	Carcinoma in situ, bladder
0.0564673	0.0385159	1.46608	0.142628	0.519377	601	450500	1.05809	Q17_CONGEN_DEFORMITI_HIP	Q17	Congenital deformities of hip
0.133278	0.0909339	1.46566	0.14274	0.543732	87	453646	1.14257	CD2_BENIGN_CONNSOFT_ABD	CD2	Benign neoplasm: Connective and other soft tissue of abdomen
0.0258884	0.0176887	1.46356	0.143314	0.507197	2913	450820	1.02623	G6_NEUINFL	G6	Inflammatory diseases of the central nervous system
-0.162738	0.111247	-1.46286	0.143507	0.418132	58	345105	0.849814	CD2_BENIGN_THYMUS_EXALLC	CD2	Benign neoplasm: Thymus
0.095507	0.065297	1.46265	0.143562	0.523028	184	453549	1.10022	EPISEIZALCO	ALCO	Epileptic seizures related to alcohol
0.0137367	0.00940765	1.46017	0.144244	0.502789	11867	248261	1.01383	ALLERG_ASTHMA	ASTHMA	Allergic asthma (mode)
0.0254772	0.0174483	1.46015	0.144248	0.508391	2951	431119	1.0258	H8_VESTIBNEUR	H8	Vestibular neuronitis
-0.0170296	0.0116651	-1.45988	0.144324	0.495916	7061	247557	0.983115	N14_ENDOMETRIOSIS_ASRM_STAGE1_2	N14	Endometriosis ASRM stages 1,2
0.0238833	0.0163708	1.45889	0.144595	0.508082	3384	287796	1.02417	M13_REACTARTH	M13	Reactive arthropathies
-0.0568087	0.0389409	-1.45885	0.144607	0.477787	535	453198	0.944775	AB1_HIV	AB1	Human immunodeficiency virus [HIV] disease
-0.0123728	0.00851327	-1.45336	0.146125	0.49974	18051	165601	0.987703	Z21_OUTCO_DELIV	Z21	Outcome of delivery
0.0346037	0.0238112	1.45325	0.146153	0.510129	1588	452145	1.03521	VWXY20_KAATUV_PUTOAV_TAI_SINKO_ESINEEN_OSUMAN_AIHEUTTAMAT_TAPATURMAT	VWXY20	Struck by thrown, projected or falling objec
0.0473399	0.0326019	1.45206	0.146485	0.508084	835	450500	1.04848	Q17_CONGEN_DEFORMITI_FEET	Q17	Congenital deformities of feet
0.0112007	0.00771589	1.45164	0.146602	0.501746	20634	119468	1.01126	N14_FEMGENPROL	N14	Female genital prolapse
0.0411097	0.0283669	1.44921	0.147278	0.507792	1104	433177	1.04197	ST19_DISLO_SPRAIN_STRAIN_JOINT_LIGAM_HIP	ST19	Dislocation, sprain and strain of joint and ligaments of hip
-0.0354166	0.0244408	-1.44907	0.147317	0.486108	1480	452253	0.965203	CD2_MULTIPLE_MYELOMA_PLASMA_CELL	CD2	Multiple myeloma and malignant plasma cell neoplasms
0.0343989	0.0237393	1.44903	0.14733	0.510552	1609	452124	1.035	VWXY20_JAAMI_PURISTUK_TAI_MURSK_JOUTU_ESINEI_SISAAN_TAI_VALIIN	VWXY20	Caught, crushed, jammed or pinched in or between objects
0.0361489	0.0249947	1.44626	0.148104	0.508455	1451	378292	1.03681	J10_PNEUMOPNEUMO	J10	Pneumonia due to Streptococcus pneumoniae
0.0192501	0.013318	1.44542	0.148341	0.509697	5227	337881	1.01944	J10_CHRONLARYNGITIS	J10	Chronic laryngitis and laryngotracheitis
0.0382837	0.0264899	1.44522	0.148397	0.517593	1245	452488	1.03903	I9_HYPERTROCARDMYOP	I9	Hypertrophic cardiomyopathy
-0.009777	0.00676711	-1.44478	0.148519	0.497517	25564	119468	0.990271	N14_OVARYCYST	N14	Ovarian cyst
0.0277831	0.0192436	1.44376	0.148806	0.505609	2480	451253	1.02817	VWXY20_FALL_LADDER	VWXY20	Fall on and from ladder
0.0268764	0.0186293	1.4427	0.149106	0.508312	2768	119468	1.02724	N14_AMENORRHEAPRIM	N14	Amenorrhoea
0.130467	0.0904525	1.44238	0.149196	0.547783	87	453646	1.13936	CD2_BENIGN_URINARY_NOS	CD2	Benign neoplasm: Urinary organ, other/unspecified
0.069922	0.0485506	1.44019	0.149814	0.513012	349	394476	1.07242	L12_PRURIGONAS	L12	Other prurigo
0.0838364	0.0582128	1.44017	0.149819	0.519243	239	433007	1.08745	D3_ANAEMIA_FOLATEDEF	D3	Folate deficiency anaemia
0.0391155	0.027184	1.43892	0.150173	0.516358	1160	180063	1.03989	O15_COMPLIC_ABORT_ECTOP_MOLAR	O15	Complications following abortion and ectopic and molar pregnancy
0.0849434	0.059057	1.43833	0.150341	0.528935	227	254391	1.08866	CD2_INSITU_VULVA	CD2	Carcinoma in situ of vulva
0.0918982	0.0639165	1.43779	0.150495	0.528042	197	453536	1.09625	VWXY20_INHAL_INGESTI_OTHER_OBJEC_CAUSI_OBSTRUCTION_RESPI_TRACT	VWXY20	Inhalation and ingestion of other objects causing obstruction of respiratory tract
0.0601061	0.0418604	1.43587	0.151039	0.517021	507	453226	1.06195	F5_READING	F5	Disorders in reading
0.0174525	0.0121557	1.43574	0.151076	0.504258	6834	382065	1.01761	Z21_ADJUS_MANAG_IMPLANTNTED_DEVICE	Z21	Adjustment and management of implanted device
0.0587292	0.0409292	1.4349	0.151317	0.516332	494	453239	1.06049	VWXY20_EXPOS_OTHER_UNSPE_MAN_M_ENVIRONMENTAL_FACTO	VWXY20	Exposure to other and unspecified man-made environmental factors
0.0638346	0.0445176	1.43392	0.151596	0.518755	413	420692	1.06592	ST19_INJURY_NERVES_FOREA_LEVEL	ST19	Injury of nerves at forearm level
-0.0138507	0.00965957	-1.43389	0.151605	0.496688	10598	244020	0.986245	O15_COMPLIC_PUERP	O15	Complications predominantly related to the puerperium
0.0404199	0.0282142	1.43261	0.151971	0.511245	1081	452652	1.04125	CD2_BENIGN_BONE_LONG_LOWER	CD2	Benign neoplasm: Long bones of lower limb
0.153712	0.107319	1.43228	0.152063	0.544363	67	453666	1.16615	VWXY20_EXPOS_EXCESSI_NATURAL_HEAT	VWXY20	Exposure to excessive natural heat
0.132349	0.0925414	1.43016	0.15267	0.555191	82	424573	1.14151	E4_MG_DEF	E4	Magnesium deficiency
0.0242273	0.0169573	1.42872	0.153085	0.505814	3319	420692	1.02452	ST19_OPEN_WOUND_FOREA	ST19	Open wound of forearm
0.044223	0.0309571	1.42853	0.153141	0.510227	896	452333	1.04522	R18_ISOLATED_PROTEINU	R18	Isolated proteinuria
0.0590719	0.0413689	1.42793	0.153312	0.514117	480	445490	1.06085	D3_EOSINOPHILIA	D3	Eosinophilia
0.0432659	0.0303344	1.4263	0.153782	0.514076	920	429396	1.04422	H7_KERATOCONUS	H7	Hereditary corneal dystrophies
0.0663974	0.0465636	1.42595	0.153883	0.518094	374	449507	1.06865	G6_CAUDA	G6	Cauda equina syndrome
0.102275	0.0717524	1.42539	0.154046	0.531198	179	453368	1.10769	P16_OTH_INFECTIONS_SPECIFIC_PERINA_PERIOD	P16	Other infections specific to the perinatal period
0.0346317	0.0243015	1.42509	0.154132	0.504675	1513	450922	1.03524	AB1_RESP_TUBERCU_NONCONF	AB1	Respiratory tuberculosis, not confirmed bacteriologically or histologically
0.0565993	0.0397232	1.42484	0.154203	0.517898	557	441041	1.05823	F5_HABIT	F5	Habit and impulse disorders
0.0347332	0.0243815	1.42457	0.154282	0.508127	1469	397583	1.03534	K11_GALLBLAOTH	K11	Other diseases of gallbladder
-0.047103	0.0330688	-1.42439	0.154333	0.485937	787	345105	0.953989	C3_MULT_MYELOMA_EXALLC	C3	Multiple myeloma
-0.0717083	0.0503444	-1.42436	0.154344	0.478263	311	451118	0.930802	ARTRHO_POSTDYSENTERIC	RHEUMA	Postdysenteric arthropathy
0.0277565	0.0195196	1.42198	0.155032	0.505117	2376	451357	1.02815	ALCODELIRIUM	F5	Alcohol withdrawal state with delirium¬†
0.0663607	0.0466747	1.42177	0.155093	0.516425	366	453367	1.06861	CD2_BENIGN_OESOPHAGUS	CD2	Benign neoplasm: Oesophagus
-0.0183024	0.0128746	-1.4216	0.155144	0.493434	5662	443974	0.981864	K11_UC_NOCD	K11	Ulcerative colitis (strict definition, all Crohn cases excluded)
-0.05733	0.0403432	-1.42105	0.155301	0.474725	514	344815	0.944282	CD2_BENIGN_BRAIN_SUPRATENT_EXALLC	CD2	Benign neoplasm: Brain, supratentorial
0.159701	0.11239	1.42094	0.155333	0.558911	56	450820	1.17316	G6_ADEM	G6	Acute disseminated encephalitis/encephalomyelitis
-0.0375385	0.0264476	-1.41936	0.155795	0.485531	1301	448451	0.963157	Q17_CONGEN_MALFO_AORTIC_MITRAL_VALVES	Q17	Congenital malformations of aortic and mitral valves
-0.0699093	0.0492655	-1.41903	0.155889	0.467956	321	395832	0.932478	G6_TARSTUN	G6	Tarsal tunnel syndrome
0.0246664	0.0173856	1.41879	0.155961	0.506925	3043	343216	1.02497	CD2_BENIGN_LIPO_NOS_EXALLC	CD2	Benign lipomatous neoplasm of other sites/unspecified
0.0356905	0.0251558	1.41878	0.155964	0.506862	1460	217833	1.03634	Z21_SPECIAL_SCREEN_EXAM_NEOPLASMS	Z21	Special screening examination for neoplasms
0.0191971	0.0135375	1.41807	0.156171	0.500912	5042	448691	1.01938	M13_MUSCULOSKELEOTH	M13	Other disorders of the musculoskeletal system and connective tissue
0.0228861	0.0161472	1.41734	0.156382	0.506673	3623	215354	1.02315	O15_PREG_GU_INFECT	O15	Infections of genitourinary tract in pregnancy
0.0797598	0.0563267	1.41602	0.156769	0.518379	264	378019	1.08303	I9_MI_COMPLICATIONS	I9	Complications following myocardial infarction
0.0353051	0.0249588	1.41454	0.157204	0.508756	1391	344344	1.03594	CD2_BENIGN_MELANOCYTIC_LOWERLIMB_EXALLC	CD2	Melanocytic naevi of lower limb, including hip
0.0643016	0.0455237	1.41249	0.157807	0.515304	410	453323	1.06641	HYPOTE_DRUGS	I9	Hypotension due to drugs
0.0757331	0.0536176	1.41247	0.157813	0.513879	337	450153	1.07867	Q17_UNDES_TESTICLE	Q17	Undescended testicle
0.0150294	0.0106417	1.41231	0.157858	0.50231	8548	445185	1.01514	CD2_BENIGN_COLON_NOS	CD2	Benign neoplasm: Colon, unspecified
0.10854	0.0768646	1.41209	0.157923	0.529148	129	453604	1.11465	C3_BONE_CARTILAGE_LIMBS	C3	Malignant neoplasm of bone and articular cartilage of limbs
0.0176291	0.0124943	1.41097	0.158253	0.506974	6242	403817	1.01779	F5_GAD	F5	Generalized anxiety disorder
0.0965646	0.0684436	1.41086	0.158285	0.531594	166	424573	1.10138	E4_THIA_DEF	E4	Thiamine deficiency
-0.0777975	0.0551618	-1.41035	0.158436	0.464227	279	453454	0.925152	OTHER_DRUGADVERS_SECONDA_PARKINSONI	G6	Other drug-induced secondary parkinsonism
0.128067	0.0908665	1.4094	0.158716	0.541517	87	345061	1.13663	CD2_BENIGN_CONNSOFT_ABD_EXALLC	CD2	Benign neoplasm: Connective and other soft tissue of abdomen
0.139408	0.0989849	1.40838	0.159019	0.550962	71	450368	1.14959	AB1_OTHER_MOSQUITO_FEVER	AB1	Other mosquito-borne viral fevers
0.0770514	0.0548242	1.40543	0.159894	0.529252	256	453477	1.0801	C3_MARGINAL_ZONE_LYMPHOMA	C3	Marginal zone B-cell lymphoma
0.046359	0.0330054	1.40459	0.160143	0.508456	864	439144	1.04745	F5_SCHIZOTYP	F5	Schizotypal disorder
0.0531045	0.0378662	1.40242	0.160789	0.509246	593	384093	1.05454	E4_ACIDOSIS	E4	Acidosis
-0.0822792	0.0587415	-1.4007	0.161304	0.467275	227	345046	0.921015	CD2_INSITU_RECTUM_EXALLC	CD2	Carcinoma in situ of rectum
0.0375389	0.026812	1.40008	0.161489	0.507566	1252	360393	1.03825	K11_PARALIL	K11	Paralytic ileus
0.0686591	0.0490499	1.39978	0.161579	0.520239	418	453303	1.07107	P16_TRANSITO_DISORD_CARBOH_METABOLISM_SPECIFIC_FETUS_NEWBO	P16	Transitory disorders of carbohydrate metabolism specific to fetus and newborn
0.131301	0.0938053	1.39971	0.161599	0.542517	83	412885	1.14031	H7_ORBITINFLAMCHRON	H7	Chronic inflammatory disorders of orbit
0.0245191	0.0175493	1.39715	0.162368	0.506549	2921	450812	1.02482	CD2_BENIGN_SALIVARY_KNOWN	CD2	Benign neoplasm: salivary glands, exclude unknown (D119)
0.0722208	0.0517268	1.3962	0.162655	0.515732	290	344948	1.07489	CD2_BENIGN_MENINGES_SPINAL_EXALLC	CD2	Benign neoplasm: Spinal meninges
0.0239524	0.0171811	1.39412	0.163282	0.508293	3060	431119	1.02424	H8_PERIPHVERTIGO	H8	Other peripheral vertigo
0.142435	0.1022	1.39369	0.163412	0.548975	67	451899	1.15308	L12_PEMPHIGUS_VULG	L12	Pemphigus vulgaris
0.0727334	0.0522117	1.39305	0.163605	0.51693	289	451215	1.07544	CML	C3	Chronic myeloid leukaemia [CML], BCR/ABL-positive
-0.0367399	0.0263847	-1.39247	0.163781	0.484119	1416	452317	0.963927	F5_MENTRET	F5	Mental retardation
0.0645492	0.0463652	1.39219	0.163864	0.519877	372	446531	1.06668	D3_SCNDTHROMBOCYTOPENIA	D3	Secondary thrombocytopenia
0.0930562	0.0668743	1.39151	0.164071	0.532183	171	453562	1.09752	C3_MOUTHNAS	C3	Malignant neoplasm of other and unspecified parts of mouth
0.0602755	0.0433191	1.39143	0.164096	0.520275	439	434925	1.06213	R18_OTHER_ABNORMALITI_PLASMA_PROTEINS	R18	Other abnormalities of plasma proteins
0.0400614	0.0288058	1.39074	0.164304	0.509135	1026	429396	1.04087	H7_CORNEALNAS	H7	Other and unspecified corneal deformities and disorders
0.114929	0.0826471	1.3906	0.164346	0.532303	107	453037	1.12179	G6_AUTOTHUNS	G6	Other and unspecified disorders of autonomic nervous system
0.109269	0.0786036	1.39012	0.164491	0.530793	122	437420	1.11546	L12_PARAPSO_PITYLICHCHRON	L12	Pityriasis lichenoides chronica
0.0598106	0.0430503	1.38932	0.164736	0.506922	484	374263	1.06164	H7_LENSDISLOCATIO	H7	Dislocation of lens
0.0373463	0.0268959	1.38855	0.16497	0.503753	1369	119468	1.03805	N14_PROHERNOV	N14	Prolapse and hernia of ovary and fallopian tube
0.0150843	0.0108778	1.3867	0.165534	0.50319	8142	394756	1.0152	F5_PERSMOOD	F5	Persistent mood disorders
0.0501995	0.0362427	1.38509	0.166024	0.512556	643	426987	1.05148	L12_PYODERMA	L12	Pyoderma
-0.0762532	0.0550777	-1.38447	0.166216	0.467376	267	345118	0.926582	C3_MANTLE_CELL_LYMPHOMA_EXALLC	C3	Mantle cell lymphoma
0.0182777	0.0132058	1.38407	0.166338	0.504273	5321	287796	1.01845	M13_HALLUXRIGIDUS	M13	Hallux rigidus
-0.0671723	0.048534	-1.38403	0.166351	0.474227	350	450595	0.935034	Q17_PHAKOMATOSES_NOT_ELSEW_CLASSIFIED	Q17	Phakomatoses, not elsewhere classified
-0.0275909	0.0199432	-1.38348	0.166519	0.490449	2315	451418	0.972786	CD2_INSITU_SKIN	CD2	Carcinoma in situ of skin
0.0128438	0.0092859	1.38315	0.166619	0.501933	11914	330456	1.01293	KRA_PSY_PERSON_EXMORE	KRA_PSY	Personality disorders
-0.0252432	0.0182625	-1.38224	0.166897	0.48957	2692	451041	0.975073	CD2_BENIGN_MELANOCYTIC_NOS	CD2	Melanocytic naevi, other sites/unspecified
0.072415	0.0524677	1.38018	0.16753	0.518649	277	432686	1.0751	L12_HAIRLOSSNONSCAR	L12	Other nonscarring hair loss
-0.0491962	0.0356611	-1.37955	0.167726	0.479347	658	453075	0.951994	C3_SMALL_INTESTINE	C3	Malignant neoplasm of small intestine
0.0177848	0.0128928	1.37943	0.167762	0.497647	8241	199505	1.01794	AD_LO_EXMORE	NEURO	Alzheimer‚Äôs disease (Late onset)
-0.085895	0.0622932	-1.37888	0.167931	0.466414	198	345118	0.917691	C3_PANCREAS_DUCTAL_EXALLC	C3	Ductal carcinoma of pancreas
-0.114062	0.0827504	-1.37839	0.168083	0.462879	114	452508	0.892202	ST19_OPEN_WOUNDS_INVOLVI_MULTIPLE_BODY_REGIONS	ST19	Open wounds involving multiple body regions
0.0212646	0.0154303	1.37811	0.16817	0.50401	3991	365880	1.02149	Z21_PROBL_RELATED_LIFESTYLE	Z21	Problems related to lifestyle
-0.0204642	0.0148638	-1.37678	0.168579	0.495251	4271	250347	0.979744	CD2_BENIGN_BREAST	CD2	Benign neoplasm of breast
0.0823644	0.0598274	1.3767	0.168605	0.525333	215	384093	1.08585	E4_PLASMAPROT	E4	Disorders of plasma-protein metabolism, not elsewhere classified
-0.0204769	0.0148813	-1.37602	0.168816	0.492965	4160	449573	0.979731	CD2_BENIGN_MELANOCYTIC_TRUNK	CD2	Melanocytic naevi of trunk
0.0385586	0.0280339	1.37543	0.168999	0.507602	1104	192896	1.03931	E4_TESTIDYS	E4	Testicular dysfunction
0.0530745	0.0385879	1.37542	0.169002	0.514056	559	453174	1.05451	Z21_ALCOHOL_ABUSE_COUNSELLI_SURVE	ALCO	Alcohol abuse counselling and surveillance
0.0474711	0.0345194	1.3752	0.169069	0.518311	712	449507	1.04862	G6_PARDIPLE	G6	Paraplegia, diplegia of upper limbs
-0.0232327	0.0168969	-1.37497	0.16914	0.492295	3213	450520	0.977035	C3_RECTUM	C3	Malignant neoplasm of rectum
0.0264996	0.0193119	1.37219	0.170004	0.505929	2469	450400	1.02685	ST19_INJURY_UNSPE_BODY_REGION	ST19	Injury of unspecified body region
0.0473466	0.0345087	1.37202	0.170057	0.509552	701	453032	1.04849	PDMED_RASAGILINE	RX	Use of rasagiline
0.0134161	0.00978391	1.37124	0.170299	0.498992	10961	397865	1.01351	H8_OTHHEARINGLOSS	H8	Other hearing loss
-0.152197	0.111238	-1.36821	0.171247	0.420472	58	453675	0.858819	CD2_BENIGN_THYMUS	CD2	Benign neoplasm: Thymus
-0.129355	0.0946465	-1.36672	0.171713	0.441164	84	345105	0.878662	CD2_INSITU_SKIN_LIP_EXALLC	CD2	Carcinoma in situ of skin of lip
0.109387	0.0800473	1.36653	0.171772	0.536666	120	453613	1.11559	C3_ADRENAL_GLAND	C3	Malignant neoplasm of adrenal gland
0.140719	0.102994	1.36628	0.171853	0.542699	68	438050	1.1511	L12_ERYTHINOTH	L12	Erythema in diseases classified elsewhere
0.0224797	0.0164841	1.36372	0.172656	0.506669	3407	426987	1.02273	L12_PILONIDALCYST	L12	Pilonidal cyst
0.035092	0.0257819	1.36111	0.173479	0.509821	1312	452421	1.03572	CD2_NONHODGKIN_NAS	CD2	Other and unspecified types of non-Hodgkin lymphoma
0.0582574	0.0428382	1.35994	0.173849	0.510911	455	401125	1.05999	ST19_CRUSHI_INJURY_WRIST_HAND	ST19	Crushing injury of wrist and hand
0.169923	0.125051	1.35883	0.174201	0.572124	50	444295	1.18521	ST19_SEQUEL_POISO_DRUGS_MEDICAM_BIOLO_SUBST	ST19	Sequelae of poisoning by drugs, medicaments and biological substances
0.00773637	0.00569525	1.35839	0.17434	0.500673	34542	392860	1.00777	I9_VARICVE	I9	Varicose veins
0.0350143	0.0257984	1.35723	0.174708	0.509877	1448	452285	1.03563	Q17_OTHER_CONGEN_MALFO_DIGES_SYSTEM1	Q17	Other congenital malformations of the digestive system
0.0574252	0.0423424	1.35621	0.175032	0.517971	466	344879	1.05911	CD2_BENIGN_SMALL_INTESTINE_OTH_EXALLC	CD2	Benign neoplasm: Other and unspecified parts of small intestine
-0.0142072	0.0104765	-1.3561	0.175067	0.496957	9048	345118	0.985893	CD2_PRIMARY_LYMPHOID_HEMATOPOIETIC_EXALLC	CD2	Primary_lymphoid and hematopoietic malignant neoplasms
0.135469	0.0999418	1.35548	0.175266	0.5354	72	453661	1.14507	C3_ACCESSORY_SINUS	C3	Malignant neoplasm of accessory sinuses
0.0668132	0.0492939	1.3554	0.175289	0.524267	321	446523	1.0691	D3_NONHEREDHYPOGAMMA	D3	Nonhereditary hypogammaglobulinemia
-0.0321974	0.0237617	-1.35501	0.175415	0.494274	1692	200445	0.968315	CD2_BENIGN_UTERUS_OTH_EXALLC	CD2	Other benign neoplasms of uterus
0.0311448	0.0229972	1.35429	0.175644	0.509666	1794	333607	1.03163	R18_OTHER_GENERAL_SYMPTOMS_SIGNS	R18	Other general symptoms and signs
-0.0613067	0.0452707	-1.35422	0.175665	0.48123	391	453342	0.940535	VWXY20_ANIMAL_R_OCCUPANT_ANIMAL_D_VEHIC_INJURED_TRANSPO_ACCIDENT	VWXY20	Animal-rider or occupant of animal-drawn vehicle injured in transport accident
0.0112139	0.00828236	1.35395	0.175752	0.503297	14734	401125	1.01128	ST19_FRACT_WRIST_HAND_LEVEL	ST19	Fracture at wrist and hand level
0.122395	0.0904034	1.35387	0.175778	0.545549	87	345067	1.1302	CD2_BENIGN_URINARY_NOS_EXALLC	CD2	Benign neoplasm: Urinary organ, other/unspecified
-0.0779378	0.057584	-1.35346	0.175908	0.469316	229	453504	0.925022	C3_LUNG_NEUROENDO	C3	Neuroendocrine tumor and carcinoma of lung
0.060814	0.0449666	1.35243	0.176239	0.526005	385	453348	1.0627	AB1_OTHER_CHLAMYDIAE	AB1	Other diseases caused by chlamydiae
0.00820902	0.00607771	1.35068	0.176799	0.500972	28748	424985	1.00824	F5_SUBSTANCE	F5	Mental and behavioural disorders due to psychoactive substance use
0.0135742	0.01005	1.35067	0.176802	0.496486	11393	442340	1.01367	ADMED_ACHEI	RX	Use of anticholinesterases
0.0135742	0.01005	1.35067	0.176802	0.496486	11393	442340	1.01367	RX_N06DA	RX	N06DA Anticholinesterases
0.102827	0.0761443	1.35043	0.176879	0.542939	129	445490	1.1083	D3_HYPERSPLENISM	D3	Hypersplenism
0.0738259	0.0547794	1.3477	0.177756	0.519621	261	438277	1.07662	K11_UC_STRICT_PSC	GASTRO	Ulcerative colitis (strict) with PSC
0.0298028	0.0221289	1.34678	0.178051	0.506917	1825	385082	1.03025	K11_OESITIS	K11	Oesophagitis
0.0273868	0.020368	1.3446	0.178754	0.508291	2168	288472	1.02777	K11_TONGUE	K11	Diseases of tongue
0.051904	0.0386451	1.3431	0.179241	0.516256	566	434885	1.05327	ST19_OTHER_UNSPE_INJURI_THORAX	ST19	Other and unspecified injuries of thorax
0.0543991	0.0405878	1.34028	0.180154	0.515877	509	453224	1.05591	C3_LARYNX	C3	Malignant neoplasm of larynx
0.03896	0.0290802	1.33974	0.180328	0.507924	1030	378292	1.03973	J10_PNEUMONONBACT	J10	Pneumonia due to other infectious organisms, not elsewhere classified
[truncated: 2,025 more rows]

## Sheet: ST 7 PGS Opposite Direction
Estimate	SE	z	p	AUC	Cases	Controls	OR	Endpoint	p_noMHC	OR_noMHC	p_noAIHTcases	OR_noAIHTcases	Description
-0.093659	0.00714583	-13.1068	3.01e-39	0.474768	23424	345118	0.910593	C3_BASAL_CELL_CARCINOMA_EXALLC	1.64e-45	0.904	6.57584e-31	0.914515	Basal cell carcinoma
-0.0922186	0.00707775	-13.0294	8.33e-39	0.475221	23936	344784	0.911906	C3_BASAL_CELL_CARCINOMA_INCLAVO_EXALLC	2.17e-45	0.905	1.48107e-30	0.915751	Basal cell carcinoma, including avohilmo
-0.0830377	0.0066479	-12.4908	8.38e-36	0.477714	27435	345118	0.920316	C3_SKIN_EXALLC	9.55e-42	0.914	3.80127e-27	0.925332	Malignant neoplasm of skin
-0.0883696	0.00714916	-12.3608	4.26e-35	0.47589	23503	345118	0.915422	C3_OTHER_SKIN_EXALLC	1.87e-42	0.907	9.77291e-27	0.921	Other malignant neoplasms of skin (=non-melanoma skin cancer)
-0.0406075	0.00385477	-10.5343	6e-26	0.490056	100190	345118	0.960206	C3_CANCER_EXALLC	1.05e-30	0.957	1.94443e-21	0.961	Malignant neoplasm
-0.114086	0.0161381	-7.06936	1.56e-12	0.462013	3484	322314	0.892181	M13_ANKYLOSPON	0.56	1.009	3.38e-13	0.884	Ankylosing spondylitis
-0.0594709	0.00861009	-6.90712	4.95e-12	0.486255	17258	143624	0.942263	C3_PROSTATE_EXALLC	8.53e-12	0.943	7.79e-10	0.947	Malignant neoplasm of prostate
-0.0777807	0.0127841	-6.08418	1.17e-09	0.474419	5703	341375	0.925167	SPONDYLOPATHY_FG	0.08	1.023	4.43e-13	0.906	Spondylopathies (FG)
-0.0549838	0.00925097	-5.94357	2.79e-09	0.486895	12081	201226	0.9465	C3_BREAST_ERPLUS_EXALLC	1.99e-07	0.953	1.81e-09	0.94	Malignant neoplasm of breast, HER-positive
-0.140248	0.0237866	-5.89609	3.72e-09	0.452956	1521	450477	0.869143	M13_ANKYLOSPON_STRICT	0.98	0.999	1.43e-08	0.869	Ankylosing spondylitis, strict definition
-0.0433535	0.00736425	-5.88702	3.93e-09	0.490309	20586	201494	0.957573	C3_BREAST_EXALLC	4.12e-07	0.963	4.26e-09	0.953	Malignant neoplasm of breast
-0.0498931	0.00881509	-5.65997	1.514e-08	0.483595	13737	438369	0.951331	L12_ACTINKERA	1.72e-11	0.942	1.07e-09	0.943	Actinic keratosis
-0.0499466	0.00919685	-5.43084	5.6089e-08	0.484085	11446	442287	0.95128	E4_NONTOXIC_THYROID	3.86e-06	0.958	5.64e-10	0.925	Nontoxic goitre/thyroid nodule
-0.0522779	0.0111568	-4.68573	2.7896e-06	0.481959	7700	410029	0.949065	SPONDYLOARTHRITIS	0.016	1.027	2.14e-09	0.931	Spondyloarthritis

## Sheet: ST 8 PGS No MHC
Estimate	SE	z	p	AUC	Cases	Controls	OR	Endpoint	Phenotypic group (ICD10)	Description
0.569746	0.0106262	53.617	0	0.648285	14521	104630	1.76782	HYPOTHY_REIMB	E4	Hypothyroidism, drug reimbursement
0.474309	0.00500927	94.6862	0	0.627088	48392	397350	1.6069	E4_HYTHY_AI_STRICT_PURCH	E4	Hypothyroidism, strict autoimmune, 3 medication purchases required
0.496297	0.0051032	97.2521	0	0.631937	49055	329775	1.64263	E4_HYTHY_AI_STRICT	E4	Hypothyroidism, strict autoimmune
0.467455	0.00646083	72.3521	0	0.618972	56383	104642	1.59593	HYPOTHY_LEVOTHY	RX	Hypothyroidism, levothyroxine purchases
0.467455	0.00646083	72.3521	0	0.618972	56383	104642	1.59593	HYPOTHY_PURCHASE	E4	Hypothyroidism and >3 levothyroxin purchases
0.439851	0.00468066	93.9719	0	0.617484	57166	385630	1.55248	E4_HYTHYNAS	E4	Hypothyroidism, other/unspecified
0.46391	0.00641842	72.2779	0	0.617979	57286	104642	1.59028	HYPOTHYROIDISM	NEURO	Hypothyroidism (congenital or acquired)
0.437528	0.00465314	94.0285	0	0.617133	57305	396428	1.54887	HYPOT_THYRO_INCL	K11	Hypothyreosis and Thyroxine purchase for inclusion criteria
0.373064	0.00432775	86.2029	0	0.598988	68103	385630	1.45218	E4_THYROID	E4	Disorders of the thyroid gland
0.288109	0.00350178	82.2751	0	0.578814	115447	338286	1.3339	AUTOIMMUNE	AUTOIMMUNE	Autoimmune diseases
0.262738	0.00337782	77.7832	0	0.571423	130392	323341	1.30049	E4_THYROID_CTRL_EXCLUSION	E4	Used for control exclusion in common control thyroid runs
0.170893	0.0031627	54.0338	0	0.542723	187511	266222	1.18636	E4_ENDONUTRMET	E4	Endocrine, nutritional and metabolic diseases
0.483598	0.0144943	33.3648	4.44164e-244	0.644329	4348	410029	1.6219	THYROIDITIS_ILD	ILD	Thyroiditis, ILD-related definition
0.304399	0.00984857	30.908	9.33697e-210	0.587263	10320	369161	1.35581	T1D_WIDE	DIAB	Type 1 diabetes, wide definition
0.310925	0.0102039	30.4711	6.28886e-204	0.589113	9582	364479	1.36469	T1D_WIDE1	DIAB	Type 1 diabetes, wide definition, subgroup 1
0.278001	0.00918328	30.2725	2.6413e-201	0.579048	11952	369038	1.32049	E4_DM1	E4	Type 1 diabetes
0.128552	0.00430219	29.8806	3.51429e-196	0.536942	63967	337247	1.13718	AUTOIMMUNE_NONTHYROID	AUTOIMMUNE	Autoimmune diseases excluding thyroid diseases
0.387894	0.0130768	29.6629	2.31563e-193	0.619604	5366	385630	1.47387	E4_THYTOXGOITDIF	E4	Thyrotoxicosis with diffuse goitre
0.182703	0.00624863	29.2389	6.21936e-188	0.552606	26134	427599	1.20046	K11_REIMB_202	GASTRO	KELA_REIMBURSEMENT_202
0.124828	0.00435462	28.6656	1.02493e-180	0.53605	62294	331969	1.13295	AUTOIMMUNE_NONTHYROID_STRICT	AUTOIMMUNE	Autoimmune diseases excluding thyroid diseases, strict definition
0.27714	0.00986149	28.1032	8.94362e-174	0.575308	12128	106310	1.31935	THYROID_DISORDER_IBD	GASTRO	Disorders of thyroid, IBD co-morbidities
0.233039	0.00838881	27.7798	7.6088e-170	0.565455	14376	439357	1.26243	T1D_ICD9_10	DIAB	Sub-endpoint used in defining T1D endpoints
0.21838	0.00792104	27.5697	2.57164e-167	0.560724	16174	437559	1.24406	INSULIN_SHORTFAST	RX	Insulin, fast-acting or short human
0.220536	0.0080424	27.4216	1.51605e-165	0.561418	15686	428397	1.24674	INSULIN_FAST	RX	Insulin, fast-acting
0.225721	0.00826882	27.2978	4.50654e-164	0.564159	14818	287796	1.25323	M13_RHEUMA	M13	Rheumatoid arthritis
0.328428	0.0121226	27.0923	1.21491e-161	0.594797	6532	428397	1.38878	INSULIN_SHORT_HUMAN	RX	Insulin, fast-acting (human)
0.255597	0.00948896	26.9363	8.26305e-160	0.57355	10819	341375	1.29123	RHEUMA_SEROPOS	RHEUMA	Seropositive rheumatoid arthritis
0.209482	0.00780235	26.8486	8.75092e-159	0.56078	16127	437606	1.23304	M13_RHEUMA_INCLAVO	M13	Rheumatoid arthritis
0.157073	0.00598194	26.2578	5.81652e-152	0.54593	29165	366945	1.17008	ILD_IMMUNOSUPPRESSIVE	RX	ILD medications: immunosuppressive drugs
0.243905	0.00938993	25.9751	9.45589e-149	0.57163	10814	442914	1.27622	RHEUMA_SEROPOS_WIDE	RHEUMA	Seropositive rheumatoid arthritis, wide
0.243761	0.00944099	25.8194	5.36489e-147	0.571601	10688	442914	1.27604	RHEUMA_SEROPOS_OTH	RHEUMA	Other/unspecified seropositive rheumatoid arthritis
0.24578	0.00954367	25.7532	2.97158e-146	0.572311	10438	443295	1.27862	RHEUMA_SEROPOS_OTH_ICD10	RHEUMA	Other/unspecified seropositive rheumatoid arthritis (ICD-10)
0.285596	0.0111173	25.6894	1.53525e-145	0.585219	7639	385630	1.33056	E4_THYTOXNAS	E4	Thyrotoxicosis, other and/or unspecified
0.137234	0.0054032	25.3987	2.60493e-142	0.537674	39202	287796	1.1471	M13_POLYARTHROPATHIES	M13	Polyarthropathies
0.156211	0.00648885	24.0738	4.70486e-128	0.541431	25336	376677	1.16907	INSULINS	RX	Insulin medication
0.153354	0.00640332	23.9491	9.43468e-127	0.544921	24774	428959	1.16574	RX_CROHN_2NDLINE	RX	Second line medication for Crohn's disease
0.153935	0.00648527	23.7361	1.53075e-124	0.545066	24082	429651	1.16641	RX_L04AX	RX	L04AX Other immunosuppressants
0.0762322	0.00326627	23.3392	1.77272e-120	0.51556	260614	193119	1.07921	ANY_REIMB	SHARED	Any reimbursement code in KELA
0.152722	0.00658615	23.1884	5.9642e-119	0.54106	24140	428397	1.165	INSULIN_INTER_AND_LONG	RX	Insulin, intermediate and long-acting
0.0869797	0.00378137	23.0022	4.43545e-117	0.524736	86788	366945	1.09087	ILD_MEDICATIONS	RX	ILD medications
0.222352	0.00984791	22.5786	7.0284e-113	0.568042	9801	441605	1.24901	THYROTOXICOSIS	GASTRO	Thyrotoxicosis
0.272771	0.0123477	22.0908	3.87287e-108	0.583743	6059	378074	1.3136	RX_L01BA01	RX	Methotrexate
0.325581	0.0147443	22.0818	4.73145e-108	0.594468	4486	370057	1.38483	E4_DM1_STRICT	E4	Type 1 diabetes, strict (exclude DM2)
0.109772	0.00497247	22.076	5.38081e-108	0.532031	43704	405870	1.11602	ILD_SYST_AUTO_DISEASES	ILD	Autoimmune diseases related-to ILD
0.32377	0.0146766	22.0603	7.60369e-108	0.594118	4526	369007	1.38233	T1D	DIAB	Type1 diabetes, definitions combined
0.336668	0.0153891	21.877	4.30375e-106	0.595385	3982	433007	1.40027	D3_ANAEMIA_B12_DEF	D3	Vitamin B12 deficiency anaemia
0.346248	0.0162024	21.3701	2.53462e-101	0.601684	3690	369007	1.41375	T1D_STRICT	DIAB	Type 1 diabetes, strict definition
0.0843226	0.00394684	21.3646	2.8538e-101	0.52401	78149	366945	1.08798	ILD_CORTISONE	RX	ILD medications: prednisolone, methylprednisolone, prednisone
0.0847289	0.00397982	21.2896	1.41644e-100	0.523648	75659	378074	1.08842	IBD_DRUGS	RX	Inflammatory bowel disease treatment related agents
0.344057	0.0166518	20.6619	7.6348e-95	0.601103	3481	364434	1.41066	T1D_STRICT1	DIAB	Type 1 diabetes, strict definition, subgroup 1
0.264456	0.0129267	20.4582	5.07737e-93	0.580214	5426	443295	1.30272	RHEUMA_SEROPOS_STRICT	RHEUMA	Seropositive rheumatoid arthritis, strict definition
0.0857863	0.00428742	20.0088	4.61494e-89	0.523842	63282	378074	1.08957	RX_H02AB06	RX	Oral corticosteroids
0.319646	0.0160415	19.9262	2.41397e-88	0.605726	3437	450296	1.37664	E4_GRAVES_STRICT	E4	Graves disease, strict definition
0.396439	0.0199404	19.8812	5.91809e-88	0.62809	2190	336787	1.48652	AUTOIMMUNE_HYPERTHYROIDISM	E4	Autoimmune hyperthyroidism
0.0722854	0.00367685	19.6596	4.78463e-86	0.520652	93616	360117	1.07496	RX_CROHN_1STLINE	RX	First line medication for Crohn's disease
0.0762606	0.00392199	19.4443	3.25412e-84	0.512054	125654	295780	1.07924	DM_COMORB_EXMORE	E4	Diabetes-related co-morbidities/complications
0.14998	0.00780413	19.218	2.61637e-82	0.534723	33700	104642	1.16181	D3_ANAEMIA	D3	Anaemias
0.344597	0.0181413	18.9952	1.87051e-80	0.600533	2947	450786	1.41142	T1D_EARLY	DIAB	Type1 diabetes, definitions combined, early onset
0.201918	0.0112999	17.869	2.05779e-71	0.560588	7314	446419	1.22375	RHEUMA_OTHER_WIDE	RHEUMA	Other (seronegative) rheumatoid arthritis, wide
0.408538	0.0228782	17.8571	2.54749e-71	0.631181	1613	452120	1.50462	K11_ORAL_LICHEN_WIDE_HYPOT_THYRO	K11	Oral lichen ruber planus wide, hypothyreosis or thyroxin
0.0793549	0.00449288	17.6624	8.1738e-70	0.519295	131176	104642	1.08259	ANTIDEPRESSANTS	NEURO	Depression medications
0.153128	0.00868946	17.6222	1.66312e-69	0.545495	12814	378074	1.16547	RX_A07EC01	RX	Sulfasalazine
0.630971	0.0362203	17.4204	5.78065e-68	0.707135	612	385630	1.87943	E4_THYROIDITAUTOIM	E4	Autoimmune thyroiditis
0.0740028	0.00425529	17.3908	9.69186e-68	0.517416	68356	368997	1.07681	KELA_DIAB_INSUL_EXMORE	DIAB	Diabetes, insulin treatment (Kela reimbursement)
0.505553	0.0291584	17.3382	2.42295e-67	0.659612	1006	385630	1.6579	E4_CONGEIOD	E4	Congenital iodine-deficiency syndrome/hypothyroidism
0.0672854	0.00391066	17.2056	2.40882e-66	0.51554	84695	369038	1.0696	E4_DIABETES	E4	Diabetes mellitus
0.0723237	0.00422581	17.1147	1.15232e-65	0.517077	68356	385377	1.075	KELA_DIAB_INSUL	DIAB	Diabetes, insulin treatment (Kela reimbursement)
0.241365	0.0141423	17.0668	2.62101e-65	0.571974	4589	449037	1.27298	RHEUMA_NOS	RHEUMA	Other/unspecified rheumatoid arthritis
0.0665054	0.0039201	16.9652	1.48528e-64	0.515298	84277	369456	1.06877	DIABETES_FG	DIAB	Diabetes, varying definitions
0.0680742	0.00404117	16.8452	1.13818e-63	0.515719	77056	376408	1.07044	DIAB_MED	RX	Diabetes medication
0.178232	0.0108802	16.3813	2.60325e-60	0.553556	7868	445865	1.1951	RX_L04AA	RX	L04AA Selective immunosuppressants
0.0578344	0.00355514	16.2678	1.67002e-59	0.514492	112358	341375	1.05954	RHEUMA_ENDPOINTS	RHEUMA	Finngen Rheumatological endpoints
0.0637157	0.0040597	15.6947	1.64478e-55	0.514627	203840	106310	1.06579	NEURODIS	GASTRO	Neurological diseases
0.128401	0.00830169	15.4669	5.80467e-54	0.538286	14309	439424	1.13701	M13_SYSTCONNECT	M13	Systemic connective tissue disorders
0.194365	0.0129562	15.0017	7.15681e-51	0.55989	5459	448274	1.21454	RX_RHEUMA_BIOLOGICAL	RX	Biological medication for rheuma
0.0686519	0.00467616	14.6812	8.50269e-49	0.518838	52361	401372	1.07106	D3_BLOOD_IMMUN	D3	Diseases of the blood and blood-forming organs and certain disorders involving the immune mechanism
0.207597	0.0141404	14.6812	8.50972e-49	0.563123	4567	341375	1.23072	RHEUMA_SERONEG	RHEUMA	Seronegative rheumatoid arthritis
0.160416	0.0109933	14.5922	3.14947e-48	0.550834	7679	446054	1.174	GRAVES_COND	E4	Carbimazole or st.post thyroidectomy, condition for graves disease
0.128059	0.0089215	14.354	1.00633e-46	0.533683	12681	426197	1.13662	DM_RETINOPATHY	DIAB	Diabetic retinopathy
0.100807	0.00707837	14.2416	5.05919e-46	0.527979	20726	433007	1.10606	D3_NUTRIANAEMIA	D3	Nutritional anaemias
0.136268	0.00961111	14.1782	1.25069e-45	0.54024	10681	341375	1.14599	OTHER_SYSTCON_FG	RHEUMA	Other systemic involvement of connective tissue (FG)
-0.101357	0.00715841	-14.1592	1.63947e-45	0.473094	23424	345118	0.90361	C3_BASAL_CELL_CARCINOMA_EXALLC	C3	Basal cell carcinoma
-0.100254	0.00709035	-14.1395	2.16874e-45	0.473424	23936	344784	0.904608	C3_BASAL_CELL_CARCINOMA_INCLAVO_EXALLC	C3	Basal cell carcinoma, including avohilmo
0.192383	0.0136466	14.0975	3.93274e-45	0.559435	4898	448835	1.21214	RX_L04AB	RX	Tumor necrosis factor alpha inhibitors
0.0481621	0.00341829	14.0895	4.40632e-45	0.506949	240395	213338	1.04934	RX_ANTIHYP	RX	Antihypertensive medication - note that there are other indications
0.0592351	0.00424249	13.9623	2.64659e-44	0.513124	69640	384093	1.06102	E4_METABOLIA	E4	Metabolic disorders
0.058958	0.00426734	13.8161	2.03843e-43	0.507551	137388	231952	1.06073	FG_HYPERTENSION	CARDIO	Hypertensive diseases (excluding secondary)
-0.0978037	0.00716228	-13.6554	1.87475e-42	0.473743	23503	345118	0.906827	C3_OTHER_SKIN_EXALLC	C3	Other malignant neoplasms of skin (=non-melanoma skin cancer)
0.105629	0.00774422	13.6397	2.32633e-42	0.530801	16313	437420	1.11141	L12_PAPULOSQUAMOUS	L12	Papulosquamous disorders
0.326017	0.0239903	13.5895	4.62082e-42	0.60662	1454	441650	1.38544	D1_ICD8	DIAB	ICD-8 DM (Sub-endpoint used for defining DM endpoints)
0.0479156	0.0035294	13.5761	5.54736e-42	0.506778	155745	297988	1.04908	RX_STATIN	RX	Statin medication
-0.0901443	0.00665946	-13.5363	9.55142e-42	0.476239	27435	345118	0.913799	C3_SKIN_EXALLC	C3	Malignant neoplasm of skin
0.126244	0.00942678	13.392	6.73372e-41	0.535772	11226	385082	1.13456	K11_CHRONGASTR	K11	Chronic gastritis
-0.0913406	0.00692466	-13.1906	9.93593e-40	0.474037	23424	430309	0.912707	C3_BASAL_CELL_CARCINOMA	C3	Basal cell carcinoma
-0.0903724	0.00685681	-13.1799	1.14472e-39	0.474358	23936	429797	0.913591	C3_BASAL_CELL_CARCINOMA_INCLAVO	C3	Basal cell carcinoma, including avohilmo
0.112907	0.00857075	13.1735	1.2471e-39	0.532353	13415	341375	1.11953	RHEU_ARTHRITIS_OTH	RHEUMA	Other arthritis (FG)
0.124196	0.00944277	13.1525	1.64683e-39	0.537488	10882	439424	1.13224	M13_OTHCONN	M13	Other systemic involvement of connective tissue
-0.0886223	0.00693445	-12.78	2.12049e-37	0.474644	23503	426298	0.915191	C3_OTHER_SKIN	C3	Other malignant neoplasms of skin (=non-melanoma skin cancer)
0.0396334	0.00310924	12.747	3.24107e-37	0.50899	266517	187216	1.04043	M13_MUSCULOSKELETAL	M13	Diseases of the musculoskeletal system and connective tissue
0.0446783	0.00352742	12.666	9.12458e-37	0.506585	247713	206020	1.04569	I9_CVD	I9	Cardiovascular diseases
0.11653	0.00923339	12.6205	1.6272e-36	0.533605	11511	287796	1.12359	M13_ARTHRITISNAS	M13	Other specified/unspecified arthritis
0.404948	0.032114	12.6097	1.8673e-36	0.638652	778	412885	1.49922	H7_LACRIMALORBITINOTH	H7	Disorders of lacrimal system and orbit in diseases classified elsewhere
-0.0811752	0.00644129	-12.6023	2.04998e-36	0.477139	27435	426298	0.922032	C3_SKIN	C3	Malignant neoplasm of skin
0.140166	0.0111825	12.5344	4.83977e-36	0.540395	7450	446283	1.15046	K11_LICHEN_PLANUS_WIDE	K11	Lichen ruber planus, wide definition including periferal and oral lichen planus
0.0480183	0.00383209	12.5306	5.0788e-36	0.507507	116714	316345	1.04919	I9_HYPTENSESS	I9	Hypertension, essential
0.0453522	0.00362245	12.5198	5.82052e-36	0.506835	137312	316345	1.0464	I9_HYPTENS	I9	Hypertension
0.0453375	0.00362146	12.5191	5.86788e-36	0.506835	137388	316345	1.04638	I9_HYPERTENSION	I9	Hypertensive diseases
0.0502124	0.00403371	12.4482	1.43029e-35	0.510918	79190	369038	1.05149	E4_DM2	E4	Type 2 diabetes
0.038201	0.00307818	12.4103	2.29849e-35	0.509476	251759	201974	1.03894	K11_GIDISEASES	K11	Gastrointestinal diseases
0.401333	0.0324423	12.3707	3.76628e-35	0.638336	761	452972	1.49382	GRAVES_OPHT	E4	Graves ophthalmopathy
0.0442727	0.00358344	12.3548	4.59017e-35	0.505696	221781	231952	1.04527	FG_CVD	CARDIO	Cardiovascular diseases (excluding rheumatic etc)
0.038955	0.00315631	12.3419	5.38395e-35	0.509681	165937	287796	1.03972	M13_ARTHROPATHIES	M13	Arthropathies
0.1835	0.0148904	12.3234	6.77926e-35	0.552591	4248	369362	1.20141	DM_MACULOPATHY_EXMORE	DIAB	Diabetic maculopathy
0.232305	0.0189674	12.2476	1.72997e-34	0.569866	2436	441605	1.2615	THYROIDITIS	GASTRO	Thyroiditis
0.147266	0.0120506	12.2207	2.4113e-34	0.542147	6379	447354	1.15866	L12_LICHENPLANUS_INCLAVO	L12	Lichen planus, including avohilmo
0.16839	0.0143218	11.7576	6.45278e-32	0.548313	4568	433899	1.1834	K11_COELIAC	K11	Coeliac disease
0.0414308	0.00352731	11.7457	7.42954e-32	0.51027	134582	217833	1.0423	Z21_OTHER_SPECIAL_EXAM_INVES_PERSONS_WO_COMPLA_REPOR_DIAGNOSIS	Z21	Other special examinations and investigations of persons without complaint or reported diagnosis
0.242573	0.0206852	11.7269	9.27867e-32	0.576621	2027	448835	1.27452	RX_L04AB01	RX	Etanercept
0.73048	0.0625527	11.6778	1.65469e-31	0.754695	185	385630	2.07608	E4_HYTHYPOSTINF	E4	Postinfectious hypothyroidism
0.280357	0.0242692	11.552	7.21398e-31	0.589317	1447	412885	1.3236	H7_ORBIT	H7	Disorders of orbit
0.158833	0.0137783	11.5278	9.55855e-31	0.548103	4811	384093	1.17214	E4_METABO	E4	Other metabolic disorders
0.0984268	0.00854188	11.5229	1.01204e-30	0.530238	13322	440411	1.10343	E4_HYTHY_AI_EXCL	E4	Developmental endpoint to exclude non autoimmune-cases from E4_HYTHY_AI_STRICT
-0.0444737	0.00386066	-11.5197	1.04961e-30	0.489823	100190	345118	0.956501	C3_CANCER_EXALLC	C3	Malignant neoplasm
-0.0441224	0.00383291	-11.5115	1.15514e-30	0.489872	100190	353543	0.956837	C3_CANCER	C3	Malignant neoplasm
0.16449	0.0143538	11.4596	2.10367e-30	0.550472	4403	384093	1.17879	E4_ENDOMETPOSTOP	E4	Postprocedural endocrine and metabolic disorders, not elsewhere classified
0.0512323	0.00447851	11.4396	2.6508e-30	0.506525	75592	378141	1.05257	I9_IHD	I9	Ischaemic heart disease, wide definition
0.0708808	0.00621083	11.4124	3.62388e-30	0.517017	28876	413784	1.07345	H7_RETINALDISOTH	H7	Other retinal disorders
0.0564987	0.00496237	11.3854	4.94275e-30	0.511394	49101	370829	1.05813	T2D_WIDE	DIAB	Type 2 diabetes, wide definition
0.396183	0.0350951	11.2888	1.49011e-29	0.635319	646	453087	1.48614	E4_GRAVES_OPHT_STRICT	E4	Graves ophthalmopathy, strict
0.0341	0.00304277	11.2069	3.77099e-29	0.50924	196153	250671	1.03469	PULMONARYDG	ASTHMA	Other pulmonary diagnosis
0.0564585	0.00503972	11.2027	3.95497e-29	0.507526	56685	378019	1.05808	I9_CORATHER	I9	Coronary atherosclerosis
0.0335354	0.00301193	11.1342	8.55178e-29	0.509093	204313	249420	1.0341	ILD_DIFF_DG	ILD	ILD differential diagnosis
0.0335207	0.00301391	11.122	9.80418e-29	0.50919	203062	250671	1.03409	ASTHMA_EXCL	ASTHMA	Excluding asthma or asthma-COPD overlap
0.0495362	0.00445644	11.1156	1.05301e-28	0.506185	75714	378019	1.05078	I9_ISCHHEART	I9	Ischemic heart diseases
-0.0415894	0.00374404	-11.1082	1.14491e-28	0.490449	108592	345141	0.959264	C3_CANCER_WIDE	C3	Malignant neoplasm, wide definition for exclusion
-0.0415613	0.00374412	-11.1004	1.24844e-28	0.490451	108592	345118	0.959291	C3_CANCER_WIDE_EXALLC	C3	Malignant neoplasm, wide definition for exclusion
0.033382	0.00301215	11.0824	1.5264e-28	0.509031	204044	249689	1.03395	COPD_EXCL	COPD	COPD differential diagnosis
0.0357362	0.00322497	11.0811	1.54926e-28	0.509761	141837	311896	1.03638	AB1_INFECT_PARASIT	AB1	Certain infectious and parasitic diseases
0.248481	0.0225509	11.0187	3.10629e-28	0.576801	1798	341375	1.28208	JUVEN_ARTHR	RHEUMA	Juvenile arthritis (FINNGEN)
0.158295	0.0143871	11.0026	3.71466e-28	0.546276	4395	437420	1.17151	L12_LICHENPLANUS	L12	Lichen planus
0.0328948	0.00301644	10.9052	1.08899e-27	0.509014	235900	217833	1.03344	Z21_PERSONS_ENCOUNTERI_HEALTH_SERVI_EXAM_INVES	Z21	Persons encountering health services for examination and investigation
-0.0403025	0.00371126	-10.8595	1.7973e-27	0.490825	107477	346256	0.960499	ANY_CANC	SHARED	Any event in cancer register
0.0336267	0.00309816	10.8538	1.91355e-27	0.50739	176220	277513	1.0342	G6_NEURO	G6	Neurological diseases
0.261902	0.0243435	10.7586	5.399e-27	0.579392	1548	287796	1.2994	M13_JUVEARTH	M13	Other juvenile arthritis
0.0344573	0.00320624	10.747	6.12487e-27	0.507215	189686	264047	1.03506	H7_EYE_ADNEXA	H7	Diseases of the eye and adnexa
0.0509342	0.00487966	10.4381	1.66172e-25	0.508187	58975	394758	1.05225	I9_HEARTFAIL_NS	I9	Heart failure, not strict
0.142448	0.0137144	10.3867	2.849e-25	0.539114	5042	431022	1.15309	DM_NEPHROPATHY	DIAB	Diabetic nephropathy
0.0337112	0.00325222	10.3656	3.55513e-25	0.509485	136974	316759	1.03429	L12_SKIN_SUBCUTAN	L12	Diseases of the skin and subcutaneous tissue
0.149137	0.0145518	10.2486	1.20019e-24	0.536367	5403	106310	1.16083	IBD_PULM	GASTRO	Respiratory diseases principally affecting the interstitium, IBD co-morbidites
0.175122	0.0171519	10.2101	1.78713e-24	0.558142	2981	439424	1.19139	M13_SJOGREN	M13	Sicca syndrome [Sj√∂gren]
0.174288	0.0172509	10.1031	5.34984e-24	0.554893	2980	448835	1.1904	RX_L04AB04	RX	Adalimumab
0.266896	0.0264526	10.0896	6.14102e-24	0.590843	1198	338286	1.3059	SLE_FG	RHEUMA	SLE (Finngen)
0.0597576	0.0059484	10.046	9.56807e-24	0.518392	29160	424573	1.06158	E4_NUTRIDEF	E4	Other nutritional deficiencies
0.048731	0.00485096	10.0456	9.60202e-24	0.509596	50955	384093	1.04994	E4_LIPOPROT	E4	Disorders of lipoprotein metabolism and other lipidaemias
0.050872	0.00510346	9.96814	2.10127e-23	0.507105	51098	402635	1.05219	I9_CHD	I9	Major coronary heart disease event
0.0451945	0.00457128	9.88661	4.75859e-23	0.513305	100406	98965	1.04623	RX_COXIBS	RX	Coxibs
0.096003	0.00977198	9.82431	8.84764e-23	0.533826	13942	50504	1.10076	DM1_RETINOPATHY	E4	Type 1 diabetes with retinopathy
0.116039	0.0118556	9.7877	1.27157e-22	0.532922	6764	446969	1.12304	N14_GLOMERULAR	N14	Glomerular diseases
0.031017	0.00317783	9.76043	1.66451e-22	0.506246	174010	279723	1.0315	RX_PARASETAMOL	RX	Parasetamol
0.0293268	0.00300657	9.75423	1.76943e-22	0.507692	249461	204272	1.02976	J10_RESPIRATORY	J10	Diseases of the respiratory system
0.0293135	0.00301655	9.71755	2.53821e-22	0.507462	212869	239973	1.02975	PAIN	MISC	Pain (limb, back, neck, head abdominally)
0.0326082	0.00336128	9.70113	2.98192e-22	0.507804	124240	329493	1.03315	RX_OPIOIDS	RX	Opioids
0.0663951	0.00688211	9.64749	5.03717e-22	0.508715	26345	378019	1.06865	I9_REVASC	I9	Coronary revascularization (ANGIO or CABG)
0.0968856	0.0100728	9.61857	6.67499e-22	0.524603	12681	51410	1.10173	DM_RETINOPATHY_EXMORE	DIAB	Diabetic retinopathy
0.0549313	0.00572565	9.59389	8.48219e-22	0.505926	40366	378019	1.05647	I9_ANGINA	I9	Angina pectoris
0.0872591	0.00913088	9.55649	1.21821e-21	0.52655	11479	437420	1.09118	L12_PSORIASIS	L12	Psoriasis
0.0810135	0.00849157	9.54046	1.42206e-21	0.523677	13432	440301	1.08439	K11_LIVER	K11	Diseases of liver
0.0429138	0.00451331	9.50827	1.9386e-21	0.505303	72410	381323	1.04385	I9_CVD_HARD	CARDIO	Hard cardiovascular diseases
0.0755843	0.00797449	9.47826	2.58563e-21	0.511488	26613	231952	1.07851	FG_DOAAC	I9	Diseases of arteries, arterioles and capillaries (FINNGEN)
0.0416943	0.0044013	9.47319	2.71426e-21	0.509799	57901	395832	1.04258	G6_NERPLEX	G6	Nerve, nerve root and plexus disorders
0.0488393	0.00517441	9.43861	3.77744e-21	0.511888	40848	412885	1.05005	H7_LIDLACRIMALORBIT	H7	Disorders of eyelid, lacrimal system and orbit
0.164009	0.0173902	9.43109	4.05858e-21	0.548558	3087	450646	1.17822	E4_GLUCOPANCREAS	E4	Other disorders of glucose regulation and pancreatic internal secretion
0.0488937	0.00520137	9.40015	5.44866e-21	0.513697	41292	287796	1.05011	M13_JOINTOTH	M13	Other specific joint derangements/joint disorders
0.0497116	0.00535201	9.28841	1.56616e-20	0.511689	39949	413784	1.05097	H7_CHOROIDRETINA	H7	Disorders of choroid and retina
0.0307217	0.00332264	9.24618	2.32652e-20	0.507195	318238	135495	1.0312	R18_SYMPTOMS_SIGNS_ABNORMAL_CLINI_LABOR_FINDI_NOT_ELSEW_CLASSIFIED	R18	Symptoms, signs and abnormal clinical and laboratory findings, not elsewhere classified
0.0384456	0.00416901	9.22174	2.92311e-20	0.510005	68651	385082	1.03919	K11_OESSTODUO	K11	Diseases of oesophagus, stomach and duodenum
0.0349585	0.00379296	9.21669	3.06423e-20	0.509914	286737	98965	1.03558	RX_PROPIONIX	RX	Propionic acid derivatives
0.0513382	0.00558869	9.18609	4.07376e-20	0.50996	36338	384093	1.05268	E4_HYPERCHOL	E4	Pure hypercholesterolaemia
0.0517316	0.00569666	9.08105	1.07534e-19	0.514936	34952	240864	1.05309	JOINTPAIN	M13	Pain in joint
0.0308225	0.0034109	9.03648	1.61796e-19	0.507862	120126	333607	1.0313	R18_GENERAL_SYMPTOMS_SIGNS	R18	General symptoms and signs
0.0440652	0.00487665	9.03594	1.62593e-19	0.510094	52144	238922	1.04505	J10_ASTHMA_EXMORE	J10	Asthma
0.0639313	0.00713331	8.96237	3.17773e-19	0.51749	19856	337881	1.06602	J10_CHRONSINUSITIS	J10	Chronic sinusitis
0.0405655	0.00452868	8.95747	3.32217e-19	0.512739	103071	98965	1.0414	RX_ACETICDERIV	RX	Acetic acid derivatives and related substances
0.0431991	0.00484928	8.90835	5.17966e-19	0.510009	52144	248261	1.04415	J10_ASTHMA	J10	Asthma
0.0519808	0.00584016	8.90059	5.55499e-19	0.511092	33409	420324	1.05336	I9_DOAAC	I9	Diseases of arteries, arterioles and capillaries
0.125331	0.014101	8.88806	6.21875e-19	0.540785	4547	341375	1.13352	PSOR_ENTE_ARTHR	RHEUMA	Psoriatic and enteropathic arthropathies
0.173436	0.0195997	8.84894	8.83576e-19	0.552642	2406	450646	1.18938	E4_HYPOGLYC	E4	Hypoglycaemia, other or unspecified
0.0362165	0.00410725	8.81771	1.16822e-18	0.509135	71544	329493	1.03688	RX_CODEINE	RX	Codeine
0.0586152	0.00664998	8.81434	1.20396e-18	0.508158	26345	427388	1.06037	I9_REVACS	I9	Emergency coronary revascularization (for ACS)
0.0291745	0.00331128	8.81064	1.24432e-18	0.507138	127203	326530	1.0296	M13_SOFTTISSUE	M13	Soft tissue disorders
0.0302999	0.00344005	8.80799	1.27412e-18	0.508721	115852	337881	1.03076	J10_UPPERDIS	J10	Other diseases of upper respiratory tract
0.174551	0.0198862	8.77749	1.6717e-18	0.554304	2190	451543	1.19071	M13_MCTD	M13	Mixed connective tissue disease
0.0532421	0.00606828	8.77384	1.72676e-18	0.516643	27852	425881	1.05468	E4_OBESITY_HYPER	E4	Obesity and other hyperalimentation
0.0532886	0.00608268	8.7607	1.9404e-18	0.516641	27711	425881	1.05473	E4_OBESITY	E4	Obesity
0.211278	0.0242456	8.71409	2.93099e-18	0.577637	1784	51410	1.23526	DM1_NEPHROPATHY	E4	Type 1 diabetes with nephropathy
0.0321386	0.00369003	8.7096	3.04961e-18	0.509154	354768	98965	1.03266	RX_NSAID	RX	Anti-inflammatory and antirheumatic products, non-steroids
0.362874	0.0417536	8.69086	3.59708e-18	0.631941	440	453293	1.43746	K11_ORAL_LICHEN_HYPOT_THYRO	K11	Oral lichen ruber planus, hypothyreosis or thyroxin
0.0473522	0.00546126	8.67056	4.29991e-18	0.506675	43101	402144	1.04849	I9_CHD_NOREV	I9	Major coronary heart disease event excluding revascularizations
0.0298254	0.00344213	8.66481	4.52272e-18	0.507265	111849	341884	1.03027	G6_EPIPAROX	G6	Episodal and paroxysmal disorders
0.141048	0.0162857	8.66081	4.68418e-18	0.541438	3514	395832	1.15148	G6_DIABETNEUR	G6	Diabetic neuropathy
[truncated: 3,824 more rows]
[truncated: 5 more columns]

[truncated: 1 more sheets: ST 9 PGS no AIHT]
